# Supplementary material
Source: PubMed Central journal article supplement (PMC3131479)
Supplement: NIHMS272612-supplement-supplement_1.pdf [file NIHMS272612-supplement-supplement_1.pdf]

## **Description of additional data files**

### **Additional file 1**

Title: Supplementary methods

File format: PDF (Adobe Acrobat)

Description: Document listing quantitative RT-PCR probes and oligonucleotides used.

### **Additional file 2**

Title: Supplementary table 2

File format: Tab-delimited spreadsheet (Microsoft Excel spreadsheet)

Description: Spreadsheet containing a list of probe sets regulated by PEDF in A375-pCEP4-PEDF Pool compared to control A375-pCEP4 Pool. For each probe set, linear ratios of GCRMA-normalized expression in PEDF-over-expressing cells compared to control cells in the two hybridizations are shown, as well as Affymetrix probe set ID, gene symbol, Unigene ID Ensemble ID and Gene Ontology (GO) functional categories.

Supplementary Table 2. Orgaz et al Gene expression profile of A375 melanoma cell line overexpressing pigment epithelium-derived factor unveils molecular aspects of its dual action on angiogenic potential and aggressiveness of human melanoma.....

Supplementary Table 2. Probe sets regulated by PEDF in A375-pCEP4-PEDF cell line compared to control A375-pCEP4 cell line Linear ratios of GCRMA-normalized expression in PEDF-overexpressing cells compared to control cells in the two hybridizations (Hybr. 1 and Hybr. 2) are shown.....

Probe set ID•Descriptions•GCRMA PEDF vs Control Hybr. 1•GCRMA PEDF vs Control Hybr. 2•Title•Gene symbol•Unigene•Ensemble ID•Biological process GO•Cellular component GO•Molecular function GO

202283\_at•"gb:NM\_002615.1 /DB\_XREF=gi:4505708 /GEN=SERPINF1 /FEA=FLmRNA /CNT=211 /TID=Hs.173594.0 /TIER=FL+Stack /STK=146 /UG=Hs.173594 /LL=5176 /DEF=Homo sapiens serine (or cysteine) proteinase inhibitor, clade F (alpha-2 antiplasmin, pigment epithelium derived fac"•66.04550743•81.0000421•"serine (or cysteine) proteinase inhibitor, clade F (alpha-2 antiplasmin, pigment epithelium derived factor), member 1"•SERPINF1•Hs.532768•ENSG00000132386•7275 // development // traceable author statement /// 8283 // cell proliferation // traceable author statement /// 16525 // negative regulation of angiogenesis // inferred from direct assay /// 50769 // positive regulation of neurogenesis // inferred from•5576 // extracellular region // inferred from direct assay•4867 // serine-type endopeptidase inhibitor activity // traceable author statement

220217\_x\_at•"gb:NM\_022661.1 /DB\_XREF=gi:13435136 /GEN=SPANXC /FEA=FLmRNA /CNT=11 /TID=Hs.178053.0 /TIER=FL /STK=0 /UG=Hs.178053 /LL=64663 /DEF=Homo sapiens SPANX family, member C (SPANXC), mRNA. /PROD=SPANX family, member C /FL=gb:NM\_022661.1 gb:BC005382.1"•34.80619013•25.90017443•"SPANX family, member C"•SPANXC•Hs.343879•ENSG00000198573•••

220922\_s\_at•"gb:NM\_013453.1 /DB\_XREF=gi:7305516 /GEN=SPANXA1 /FEA=FLmRNA /CNT=3 /TID=Hs.293266.0 /TIER=FL /STK=1 /UG=Hs.293266 /LL=30014 /DEF=Homo sapiens sperm protein associated with the nucleus, X chromosome, family member A1 (SPANXA1), mRNA. /PROD=sperm protein as"•31.8824945•45.30323786•"sperm protein associated with the nucleus, X-linked, family member A1 /// SPANX family, member B1 /// SPANX family, member A2 /// SPANX family, member C /// SPANX family, member B2"•SPANXA1 /// SPANXB1 /// SPANXA2 /// SPANXC /// SPANXB2•Hs.343879•ENSG00000198021 /// ENSG00000198820 /// ENSG00000198573•7283 // spermatogenesis // traceable author statement /// 7286 // spermatid cell development // non-traceable author statement•5634 // nucleus // traceable author statement /// 5737 // cytoplasm // traceable author statement•

224032\_x\_at•"gb:AF098306.1 /DB\_XREF=gi:6808523 /GEN=SPANX /FEA=FLmRNA /CNT=4 /TID=Hs.293266.1 /TIER=FL /STK=2 /UG=Hs.293266 /LL=30014 /DEF=Homo sapiens nuclear-associated protein SPAN-Xa (SPANX) mRNA, complete cds. /PROD=nuclear-associated protein SPAN-Xa /FL=gb:AF098"•29.67426027•19.37656374•"sperm protein associated with the nucleus, X-linked, family member A1 /// SPANX family, member A2"•SPANXA1 /// SPANXA2•Hs.334464•ENSG00000198021•7283 // spermatogenesis // traceable author statement•5634 // nucleus // traceable author statement /// 5737 // cytoplasm // traceable author statement•

1564491\_at•"gb:AK093505.1 /DB\_XREF=gi:21752399 /TID=Hs2.376478.1 /CNT=1 /FEA=mRNA /TIER=ConsEnd /STK=0 /UG=Hs.376478 /UG\_TITLE=Homo sapiens cDNA FLJ36186 fis, clone TESTI2027013, weakly similar to FIBRILLARIN. /DEF=Homo sapiens cDNA FLJ36186 fis, clone TESTI2027013, "•18.52708469•26.41751189•"CDNA FLJ36186 fis, clone TESTI2027013, weakly similar to FIBRILLARIN"••Hs.545964••••

219014\_at•"gb:NM\_016619.1 /DB\_XREF=gi:7706157 /GEN=LOC51316 /FEA=FLmRNA /CNT=86 /TID=Hs.107139.0 /TIER=FL /STK=0 /UG=Hs.107139 /LL=51316 /DEF=Homo sapiens hypothetical protein (LOC51316), mRNA. /PROD=hypothetical protein /FL=gb:NM\_016619.1 gb:AF208846.1"•15.85369814•35.93977207•placenta-specific 8•PLAC8•Hs.546392•ENSG00000145287•••

218211\_s\_at•"gb:NM\_024101.1 /DB\_XREF=gi:13129107 /GEN=MGC2771 /FEA=FLmRNA /CNT=148 /TID=Hs.321130.0 /TIER=FL+Stack /STK=78 /UG=Hs.321130 /LL=79083 /DEF=Homo sapiens hypothetical protein MGC2771 (MGC2771), mRNA. /PROD=hypothetical protein MGC2771 /FL=gb:BC001653.1 gb:N"•15.69713816•28.89682266•melanophilin•MLPH•Hs.102406•ENSG00000115648•6886 // intracellular protein transport // inferred from electronic annotation••5515 // protein binding // inferred from electronic annotation /// 17137 // Rab GTPase binding // inferred from electronic annotation

212012\_at•gb:BF342851 /DB\_XREF=gi:11289878 /DB\_XREF=602015135F1 /CLONE=IMAGE:4150664 /FEA=mRNA /CNT=397 /TID=Hs.118893.0 /TIER=Stack /STK=116 /UG=Hs.118893 /LL=7837 /UG\_GENE=D2S448 /UG\_TITLE=Melanoma associated gene•15.174786•27.85516329•Melanoma associated gene•D2S448•Hs.332197•ENSG00000130508•6955 // immune response // non-traceable author statement••4601 // peroxidase activity // inferred from electronic annotation /// 5152 // interleukin-1 receptor antagonist activity // non-traceable author statement /// 16491 // oxidoreductase activity // inferred from electronic annotation

212464\_s\_at•gb:X02761.1 /DB\_XREF=gi:31396 /FEA=mRNA /CNT=525 /TID=Hs.287820.1 /TIER=Stack /STK=509 /UG=Hs.287820 /LL=2335 /UG\_GENE=FN1 /DEF=Human mRNA for fibronectin (FN precursor). /PROD=fibronectin

precursor•14.21826924•16.52472325•fibronectin  
1•FN1•Hs.203717•ENSG00000115414•6953 // acute-phase response // inferred from  
electronic annotation /// 7155 // cell adhesion // non-traceable author  
statement /// 8152 // metabolism // inferred from electronic annotation ///  
9611 // response to wounding // non-traceable author statement•5576 //  
extracellular region // inferred from electronic annotation /// 5578 //  
extracellular matrix (sensu Metazoa) // non-traceable author statement•5201  
// extracellular matrix structural constituent // non-traceable author  
statement /// 5518 // collagen binding // non-traceable author statement ///  
8201 // heparin binding // non-traceable author statement /// 16491 //  
oxidoreductase activity // infe  
216442\_x\_at•"gb:AK026737.1 /DB\_XREF=gi:10439658 /FEA=mRNA /CNT=1  
/TID=Hs.287820.2 /TIER=ConsEnd /STK=0 /UG=Hs.287820 /LL=2335 /UG\_GENE=FN1  
/UG\_TITLE=fibronectin 1 /DEF=Homo sapiens cDNA: FLJ23084 fis, clone LNG06602,  
highly similar to HSFIB1 Human mRNA for  
fibronectin"•13.69382814•17.17159443•fibronectin  
1•FN1•Hs.203717•ENSG00000115414•6953 // acute-phase response // inferred from  
electronic annotation /// 7155 // cell adhesion // non-traceable author  
statement /// 8152 // metabolism // inferred from electronic annotation ///  
9611 // response to wounding // non-traceable author statement•5576 //  
extracellular region // inferred from electronic annotation /// 5578 //  
extracellular matrix (sensu Metazoa) // non-traceable author statement•5201  
// extracellular matrix structural constituent // non-traceable author  
statement /// 5518 // collagen binding // non-traceable author statement ///  
8201 // heparin binding // non-traceable author statement /// 16491 //  
oxidoreductase activity // infe  
210495\_x\_at•"gb:AF130095.1 /DB\_XREF=gi:11493493 /FEA=FLmRNA /CNT=8  
/TID=Hs.287820.0 /TIER=FL /STK=0 /UG=Hs.287820 /LL=2335 /UG\_GENE=FN1  
/DEF=Homo sapiens clone FLC0562 PRO2841 mRNA, complete cds. /PROD=PRO2841  
/FL=gb:AF130095.1"•13.45218576•18.24544483•fibronectin  
1•FN1•Hs.203717•ENSG00000115414•6953 // acute-phase response // inferred from  
electronic annotation /// 7155 // cell adhesion // non-traceable author  
statement /// 8152 // metabolism // inferred from electronic annotation ///  
9611 // response to wounding // non-traceable author statement•5576 //  
extracellular region // inferred from electronic annotation /// 5578 //  
extracellular matrix (sensu Metazoa) // non-traceable author statement•5201  
// extracellular matrix structural constituent // non-traceable author  
statement /// 5518 // collagen binding // non-traceable author statement ///  
8201 // heparin binding // non-traceable author statement /// 16491 //  
oxidoreductase activity // infe  
212013\_at•"gb:D86983.1 /DB\_XREF=gi:1504039 /GEN=KIAA0230 /FEA=mRNA /CNT=397  
/TID=Hs.118893.0 /TIER=Stack /STK=98 /UG=Hs.118893 /LL=7837  
/UG\_TITLE=Melanoma associated gene /DEF=Human mRNA for KIAA0230 gene, partial  
cds."•12.96386257•21.1040196•Melanoma associated  
gene•D2S448•Hs.332197•ENSG00000130508•6955 // immune response //  
non-traceable author statement••4601 // peroxidase activity // inferred from  
electronic annotation /// 5152 // interleukin-1 receptor antagonist activity  
// non-traceable author statement /// 16491 // oxidoreductase activity //  
inferred from electronic annotation  
234994\_at•gb:AA088177 /DB\_XREF=gi:1633698 /DB\_XREF=zk71a08.s1  
/CLONE=IMAGE:488246 /FEA=EST /CNT=35 /TID=Hs.172870.0 /TIER=ConsEnd /STK=1  
/UG=Hs.172870  
/UG\_TITLE=ESTs•12.51511401•7.013363264•KIAA1913•KIAA1913•Hs.172870•ENSG0000016  
4484••16021 // integral to membrane // inferred from electronic annotation•  
211719\_x\_at•"gb:BC005858.1 /DB\_XREF=gi:13543399 /FEA=FLmRNA /CNT=1  
/TID=HsAffx.900722.926 /TIER=FL /STK=0 /DEF=Homo sapiens, clone MGC:3255,  
mRNA, complete cds. /PROD=Unknown (protein for MGC:3255)  
/FL=gb:BC005858.1"•12.21664886•17.74429307•fibronectin 1 /// fibronectin  
1•FN1•Hs.203717•ENSG00000115414•6953 // acute-phase response // inferred from  
electronic annotation /// 7155 // cell adhesion // non-traceable author  
statement /// 8152 // metabolism // inferred from electronic annotation ///  
9611 // response to wounding // non-traceable author statement•5576 //  
extracellular region // inferred from electronic annotation /// 5578 //  
extracellular matrix (sensu Metazoa) // non-traceable author statement•5201  
// extracellular matrix structural constituent // non-traceable author  
statement /// 5518 // collagen binding // non-traceable author statement ///  
8201 // heparin binding // non-traceable author statement /// 16491 //  
oxidoreductase activity // infe  
209598\_at•"gb:AB020690.1 /DB\_XREF=gi:4240254 /GEN=KIAA0883 /FEA=FLmRNA  
/CNT=85 /TID=Hs.7782.0 /TIER=FL+Stack /STK=20 /UG=Hs.7782 /LL=10687 /DEF=Homo  
sapiens mRNA for KIAA0883 protein, complete cds. /PROD=KIAA0883 protein  
/FL=gb:NM\_007257.1 gb:AB020690.1  
gb:AF286487."•10.62999254•11.36750894••••••••  
205832\_at•"gb:NM\_016352.1 /DB\_XREF=gi:10047105 /GEN=LOC51200 /FEA=FLmRNA  
/CNT=38 /TID=Hs.93764.0 /TIER=FL /STK=0 /UG=Hs.93764 /LL=51200 /DEF=Homo  
sapiens carboxypeptidase A3 (LOC51200), mRNA. /PROD=carboxypeptidase A3  
/FL=gb:NM\_016352.1 gb:AF095719.1"•9.840773868•10.96643553•carboxypeptidase  
A4•CPA4•Hs.93764•ENSG00000128510•6508 // proteolysis and peptidolysis //  
non-traceable author statement /// 16573 // histone acetylation //  
non-traceable author statement••4180 // carboxypeptidase activity // inferred  
from electronic annotation /// 4182 // carboxypeptidase A activity //

non-traceable author statement /// 8237 // metallopeptidase activity // inferred from electronic annotation  
205547\_s\_at\*"gb:NM\_003186.2 /DB\_XREF=gi:12621918 /GEN=TAGLN /FEA=FLmRNA /CNT=39 /TID=Hs.75777.0 /TIER=FL /STK=0 /UG=Hs.75777 /LL=6876 /DEF=Homo sapiens transgelin (TAGLN), mRNA. /PROD=transgelin /FL=gb:NM\_003186.2 gb:D17409.1  
gb:M95787.1"\*9.786239022\*8.495929709\*transgelin\*TAGLN\*Hs.503998\*ENSG0000014959 1\*7517 // muscle development // traceable author statement\*\*3779 // actin binding // inferred from electronic annotation  
1555401\_at\*"gb:BC025383.1 /DB\_XREF=gi:19263486 /TID=Hs2.130546.2 /CNT=1 /FEA=FLmRNA /TIER=FL /STK=1 /LL=54937 /UG\_GENE=FLJ20449 /UG=Hs.130546 /DEF=Homo sapiens, clone MGC:26186 IMAGE:4829809, mRNA, complete cds. /PROD=Unknown (protein for MGC:26186) /FL=gb:BC025383.1"\*9.129536997\*4.377122703\*hypothetical protein FLJ20449\*FLJ20449\*Hs.124519\*ENSG00000083622\*\*\*  
222557\_at\*"gb:AL353715 /DB\_XREF=gi:11121028 /FEA=FLmRNA /CNT=140 /TID=Hs.285753.0 /TIER=Stack /STK=66 /UG=Hs.285753 /LL=50861 /UG\_GENE=SCLIP /UG\_TITLE=SCG10-like-protein /DEF=Human DNA sequence from clone CTD-3184A7 on chromosome 20 Contains the 5 end of the GMEB2 (9.129339648\*8.951603164\*stathmin-like 3\*STMN3\*Hs.348326\*ENSG00000197457\*7242 // intracellular signaling cascade // inferred from electronic annotation /// 7399 // neurogenesis // traceable author statement\*\*  
201009\_s\_at\*"gb:AI439556 /DB\_XREF=gi:4305149 /DB\_XREF=tc90c12.x1 /CLONE=IMAGE:2073430 /FEA=FLmRNA /CNT=488 /TID=Hs.179526.0 /TIER=Stack /STK=91 /UG=Hs.179526 /LL=10628 /UG\_GENE=VDUP1 /UG\_TITLE=upregulated by 1,25-dihydroxyvitamin D-3 /FL=gb:NM\_006472.1  
gb:S73591.1"\*8.92597045\*27.97179704\*thioredoxin interacting protein\*TXNIP\*Hs.533977\*ENSG00000117289\*\*\*  
201008\_s\_at\*"gb:AA812232 /DB\_XREF=gi:2881843 /DB\_XREF=ob84h09.s1 /CLONE=IMAGE:1338113 /FEA=FLmRNA /CNT=488 /TID=Hs.179526.0 /TIER=Stack /STK=15 /UG=Hs.179526 /LL=10628 /UG\_GENE=VDUP1 /UG\_TITLE=upregulated by 1,25-dihydroxyvitamin D-3 /FL=gb:NM\_006472.1  
gb:S73591.1"\*8.843520316\*20.74697562\*thioredoxin interacting protein\*TXNIP\*Hs.533977\*ENSG00000117289\*\*\*  
237435\_at\*"gb:AI093492 /DB\_XREF=gi:3432468 /DB\_XREF=qb15c01.x1 /CLONE=IMAGE:1696320 /FEA=EST /CNT=6 /TID=Hs.61596.0 /TIER=ConsEnd /STK=6 /UG=Hs.61596 /UG\_TITLE=ESTs\*8.670211945\*6.189522144\*Transcribed locus\*\*Hs.61596\*\*\*\*  
201010\_s\_at\*"gb:NM\_006472.1 /DB\_XREF=gi:5454161 /GEN=VDUP1 /FEA=FLmRNA /CNT=488 /TID=Hs.179526.0 /TIER=FL /STK=0 /UG=Hs.179526 /LL=10628 /DEF=Homo sapiens upregulated by 1,25-dihydroxyvitamin D-3 (VDUP1), mRNA. /PROD=upregulated by 1,25-dihydroxyvitamin D-3 /FL=gb:NM\_\*8.251454587\*18.04908706\*thioredoxin interacting protein\*TXNIP\*Hs.533977\*ENSG00000117289\*\*\*  
232884\_s\_at\*"gb:AL133055.1 /DB\_XREF=gi:6453475 /GEN=DKFZp434J1015 /FEA=mRNA /CNT=4 /TID=Hs.283779.0 /TIER=ConsEnd /STK=0 /UG=Hs.283779 /LL=54753 /DEF=Homo sapiens mRNA; cDNA DKFZp434J1015 (from clone DKFZp434J1015). /PROD=hypothetical protein\*7.626830205\*3.670275276\*hypothetical protein DKFZp434J1015\*DKFZp434J1015\*Hs.381239\*ENSG00000175419\*\*\*  
209035\_at\*"gb:M69148.1 /DB\_XREF=gi:182650 /GEN=hMK-1 /FEA=FLmRNA /CNT=196 /TID=Hs.82045.0 /TIER=FL /STK=1 /UG=Hs.82045 /LL=4192 /DEF=Human midkine mRNA, complete cds. /PROD=midkine /FL=gb:NM\_002391.1  
gb:M69148.1"\*7.291285814\*9.423256966\*midkine (neurite growth-promoting factor 2)\*MDK\*Hs.82045\*ENSG00000110492\*74 // regulation of cell cycle // inferred from electronic annotation /// 7165 // signal transduction // non-traceable author statement /// 7267 // cell-cell signaling // not recorded /// 7399 // neurogenesis // non-traceable author statement /// 8283 // \*5615 // extracellular space // not recorded\*5125 // cytokine activity // not recorded /// 8083 // growth factor activity // non-traceable author statement /// 8201 // heparin binding // inferred from direct assay  
213905\_x\_at\*"gb:AA845258 /DB\_XREF=gi:2931709 /DB\_XREF=ak84a11.s1 /CLONE=IMAGE:1414556 /FEA=EST /CNT=21 /TID=Hs.821.1 /TIER=Stack /STK=11 /UG=Hs.821 /LL=633 /UG\_GENE=BGN /UG\_TITLE=biglycan\*7.041892249\*14.21166508\*biglycan /// serologically defined colon cancer antigen 33\*BGN /// SDCCAG33\*Hs.821\*ENSG00000182492 /// ENSG00000179981\*"6355 // regulation of transcription, DNA-dependent // inferred from electronic annotation"\*5578 // extracellular matrix (sensu Metazoa) // inferred from electronic annotation /// 5578 // extracellular matrix (sensu Metazoa) // non-traceable author statement /// 5634 // nucleus // inferred from electronic annotation\*5201 // extracellular matrix structural constituent // non-traceable author statement /// 3700 // transcription factor activity // inferred from electronic annotation /// 8270 // zinc ion binding // inferred from electronic annotation  
205858\_at\*"gb:NM\_002507.1 /DB\_XREF=gi:4505392 /GEN=NGFR /FEA=FLmRNA /CNT=33 /TID=Hs.1827.0 /TIER=FL+Stack /STK=16 /UG=Hs.1827 /LL=4804 /DEF=Homo sapiens nerve growth factor receptor (TNFR superfamily, member 16) (NGFR), mRNA. /PROD=nerve growth factor receptor precu"\*6.674405371\*4.560259297\*"nerve growth factor receptor (TNFR superfamily, member 16)"\*NGFR\*Hs.415768\*ENSG00000064300\*6915 // apoptosis // inferred from electronic annotation /// 7165 // signal transduction // inferred from

electronic annotation /// 7399 // neurogenesis // inferred from electronic  
annotation /// 30154 // cell differentiation // inferred from electronic  
a•5886 // plasma membrane // traceable author statement /// 5887 // integral  
to plasma membrane // traceable author statement•4888 // transmembrane  
receptor activity // traceable author statement /// 5515 // protein binding  
// inferred from electronic annotation  
205229\_s\_at•gb:AA669336 /DB\_XREF=gi:2630835 /DB\_XREF=ad47a02.s1  
/CLONE=IMAGE:884810 /FEA=FLmRNA /CNT=56 /TID=Hs.21016.0 /TIER=Stack /STK=15  
/UG=Hs.21016 /LL=1690 /UG\_GENE=COCH /UG\_TITLE=coagulation factor C (Limulus  
polyphemus) homology (cochlin) /FL=gb:NM\_004086.1  
g•6.665126078•5.286138451•"coagulation factor C homolog, cochlin (Limulus  
polyphemus)"•COCH•Hs.21016•ENSG00000100473•7605 // perception of sound //  
traceable author statement••  
226408\_at•gb:AA905942 /DB\_XREF=gi:3041065 /DB\_XREF=oj83b12.s1  
/CLONE=IMAGE:1504895 /FEA=EST /CNT=46 /TID=Hs.153053.1 /TIER=Stack /STK=29  
/UG=Hs.153053 /LL=951 /UG\_GENE=CD37 /UG\_TITLE=CD37  
antigen•6.4173292•7.32604182•TEA domain family member  
2•TEAD2•Hs.515534•ENSG00000074219•"6350 // transcription // inferred from  
electronic annotation /// 6355 // regulation of transcription, DNA-dependent  
// inferred from electronic annotation /// 6355 // regulation of  
transcription, DNA-dependent // non-traceable author statement"•5634 //  
nucleus // inferred from electronic annotation /// 5634 // nucleus //  
non-traceable author statement•3700 // transcription factor activity //  
inferred from electronic annotation /// 3700 // transcription factor activity  
// non-traceable author statement  
212488\_at•"gb:N30339 /DB\_XREF=gi:1148859 /DB\_XREF=yw75f06.s1  
/CLONE=IMAGE:258083 /FEA=EST /CNT=164 /TID=Hs.146428.2 /TIER=Stack /STK=53  
/UG=Hs.146428 /LL=1289 /UG\_GENE=COL5A1 /UG\_TITLE=collagen, type V, alpha  
1"•6.403080019•14.91145881•"collagen, type V, alpha  
1"•COL5A1•Hs.210283•ENSG00000130635•6817 // phosphate transport // inferred  
from electronic annotation /// 7155 // cell adhesion // inferred from  
electronic annotation•5581 // collagen // inferred from electronic annotation  
/// 5588 // collagen type V // traceable author statement /// 5737 //  
cytoplasm // inferred from electronic annotation•5201 // extracellular matrix  
structural constituent // inferred from electronic annotation /// 8201 //  
heparin binding // inferred from electronic annotation  
226103\_at•gb:AF114264.1 /DB\_XREF=gi:4768674 /FEA=mRNA /CNT=107  
/TID=Hs.216381.0 /TIER=Stack /STK=15 /UG=Hs.216381 /DEF=Homo sapiens clone  
HH409 unknown mRNA. /PROD=unknown•6.281844•6.002869581•nexilin (F actin  
binding protein)•NEXN•Hs.22370•ENSG00000162614•••  
228716\_at•gb:BG494007 /DB\_XREF=gi:13455521 /DB\_XREF=602542289F1  
/CLONE=IMAGE:4673182 /FEA=EST /CNT=19 /TID=Hs.203213.0 /TIER=Stack /STK=12  
/UG=Hs.203213 /UG\_TITLE=ESTs•6.222918909•13.21065271•Hypothetical gene  
supported by AK096885; AK098084••Hs.551610••••  
226701\_at•gb:AI692880 /DB\_XREF=gi:4970220 /DB\_XREF=wd42d02.x1  
/CLONE=IMAGE:2330787 /FEA=EST /CNT=66 /TID=Hs.7473.0 /TIER=Stack /STK=27  
/UG=Hs.7473 /UG\_TITLE=ESTs•6.12832212•5.830934948•"gap junction protein,  
alpha 5, 40kDa (connexin 40)"•GJA5•Hs.447968•ENSG00000143140•6810 //  
transport // non-traceable author statement /// 6936 // muscle contraction //  
traceable author statement /// 7043 // intercellular junction assembly //  
traceable author statement /// 7154 // cell communication // inferred from  
electronic annotation•5922 // connexon complex // inferred from electronic  
annotation /// 16021 // integral to membrane // inferred from electronic  
annotation•15285 // connexon channel activity // traceable author statement  
59705\_at•"Cluster Incl. AA911739:oil5f09.s1 Homo sapiens cDNA, 3 end  
/clone=IMAGE-1476617 /clone\_end=3 /gb=AA911739 /gi=3051103 /ug=Hs.21421  
/len=1049"•6.042521229•5.84955926•selenocysteine  
lyase•SCLY•Hs.512606•ENSG00000132330•6520 // amino acid metabolism //  
traceable author statement /// 8152 // metabolism // inferred from electronic  
annotation•5829 // cytosol // traceable author statement•8483 // transaminase  
activity // inferred from electronic annotation /// 9000 // selenocysteine  
lyase activity // traceable author statement /// 16740 // transferase  
activity // inferred from electronic annotation /// 16829 // lyase activity  
// inferred f  
242363\_at•gb:BF592008 /DB\_XREF=gi:11684332 /DB\_XREF=7o35e09.x1  
/CLONE=IMAGE:3576280 /FEA=EST /CNT=6 /TID=Hs.87372.1 /TIER=ConsEnd /STK=1  
/UG=Hs.87372 /UG\_TITLE=ESTs•5.757388088•5.884397428•"Dynein, cytoplasmic,  
intermediate polypeptide 2"•DNCI2•Hs.546250•ENSG00000077380•7018 //  
microtubule-based movement // non-traceable author statement•5737 //  
cytoplasm // non-traceable author statement /// 30286 // dynein complex //  
inferred from electronic annotation•3777 // microtubule motor activity //  
non-traceable author statement  
230112\_at•"gb:AB037820.1 /DB\_XREF=gi:7243178 /GEN=KIAA1399 /FEA=mRNA /CNT=20  
/TID=Hs.66159.0 /TIER=Stack /STK=11 /UG=Hs.66159 /LL=57574 /DEF=Homo sapiens  
mRNA for KIAA1399 protein, partial cds. /PROD=KIAA1399  
protein"•5.754819615•10.20200617•membrane-associated ring finger (C3HC4)  
4•38780•Hs.170388•ENSG00000144583•16567 // protein ubiquitination // inferred  
from electronic annotation•151 // ubiquitin ligase complex // inferred from  
electronic annotation /// 16021 // integral to membrane // inferred from  
electronic annotation•4842 // ubiquitin-protein ligase activity // inferred  
from electronic annotation /// 8270 // zinc ion binding // inferred from

electronic annotation

203325\_s\_at•"gb:AI130969 /DB\_XREF=gi:3600985 /DB\_XREF=qc15e01.x1  
/CLONE=IMAGE:1709688 /FEA=FLmRNA /CNT=102 /TID=Hs.146428.0 /TIER=Stack  
/STK=37 /UG=Hs.146428 /LL=1289 /UG\_GENE=COL5A1 /UG\_TITLE=collagen, type V,  
alpha 1 /FL=gb:D90279.1 gb:NM\_000093.1  
gb:M76729.1"•5.647754005•6.954854734•"collagen, type V, alpha  
1"•COL5A1•Hs.210283•ENSG00000130635•6817 // phosphate transport // inferred  
from electronic annotation /// 7155 // cell adhesion // inferred from  
electronic annotation•5581 // collagen // inferred from electronic annotation  
/// 5588 // collagen type V // traceable author statement /// 5737 //  
cytoplasm // inferred from electronic annotation•5201 // extracellular matrix  
structural constituent // inferred from electronic annotation /// 8201 //  
heparin binding // inferred from electronic annotation  
230033\_at•gb:BF436398 /DB\_XREF=gi:11448713 /DB\_XREF=7p10d03.x1  
/CLONE=IMAGE:3645364 /FEA=EST /CNT=19 /TID=Hs.120036.0 /TIER=Stack /STK=16  
/UG=Hs.120036 /UG\_TITLE=ESTs•5.428847032•11.65718855•similar to hypothetical  
testis protein from macaque•LOC352909•Hs.351582•ENSG00000167646•••  
203438\_at•gb:AI435828 /DB\_XREF=gi:4305913 /DB\_XREF=th79e05.x1  
/CLONE=IMAGE:2124896 /FEA=FLmRNA /CNT=109 /TID=Hs.155223.0 /TIER=Stack  
/STK=18 /UG=Hs.155223 /LL=8614 /UG\_GENE=STC2 /UG\_TITLE=stanniocalcin 2  
/FL=gb:AF098462.1 gb:AF031036.1 gb:NM\_003714.1 gb:BC000658.1  
•5.403475213•5.783847195•stanniocalcin 2•STC2•Hs.233160•ENSG00000113739•7166  
// cell surface receptor linked signal transduction // traceable author  
statement /// 7267 // cell-cell signaling // traceable author statement ///  
7584 // response to nutrients // traceable author statement•5576 //  
extracellular region // inferred from electronic annotation•5179 // hormone  
activity // traceable author statement  
231921\_at•"gb:AK021599.1 /DB\_XREF=gi:10432811 /FEA=mRNA /CNT=20  
/TID=Hs.278337.0 /TIER=ConsEnd /STK=0 /UG=Hs.278337 /UG\_TITLE=Homo sapiens  
cDNA FLJ11537 fis, clone HEMBA1002742 /DEF=Homo sapiens cDNA FLJ11537 fis,  
clone HEMBA1002742."•5.218415363•6.258205939•hypothetical protein  
FLJ13096•FLJ13096•Hs.413518•ENSG00000115827•••  
212489\_at•"gb:AI983428 /DB\_XREF=gi:5810647 /DB\_XREF=wt49a04.x1  
/CLONE=IMAGE:2510766 /FEA=EST /CNT=164 /TID=Hs.146428.2 /TIER=Stack /STK=33  
/UG=Hs.146428 /LL=1289 /UG\_GENE=COL5A1 /UG\_TITLE=collagen, type V, alpha  
1"•4.884225072•9.022496386•"collagen, type V, alpha  
1"•COL5A1•Hs.210283•ENSG00000130635•6817 // phosphate transport // inferred  
from electronic annotation /// 7155 // cell adhesion // inferred from  
electronic annotation•5581 // collagen // inferred from electronic annotation  
/// 5588 // collagen type V // traceable author statement /// 5737 //  
cytoplasm // inferred from electronic annotation•5201 // extracellular matrix  
structural constituent // inferred from electronic annotation /// 8201 //  
heparin binding // inferred from electronic annotation  
236609\_at•gb:BF062287 /DB\_XREF=gi:10821185 /DB\_XREF=7k76b01.x1  
/CLONE=IMAGE:3481273 /FEA=EST /CNT=7 /TID=Hs.47660.0 /TIER=ConsEnd /STK=7  
/UG=Hs.47660 /UG\_TITLE=ESTs•4.461115799•2.430322081•PMS1 postmeiotic  
segregation increased 1 (S. cerevisiae)•PMS1•Hs.111749•ENSG00000064933•"6298  
// mismatch repair // traceable author statement /// 6355 // regulation of  
transcription, DNA-dependent // inferred from electronic annotation /// 7049  
// cell cycle // inferred from electronic annotation /// 45786 // negative  
regulation of cell cycl"•5634 // nucleus // inferred from electronic  
annotation /// 5634 // nucleus // traceable author statement /// 19866 //  
inner membrane // inferred from electronic annotation•3677 // DNA binding //  
traceable author statement /// 5524 // ATP binding // inferred from  
electronic annotation  
204468\_s\_at•"gb:NM\_005424.1 /DB\_XREF=gi:4885630 /GEN=TIE /FEA=FLmRNA /CNT=77  
/TID=Hs.78824.0 /TIER=FL+Stack /STK=32 /UG=Hs.78824 /LL=7075 /DEF=Homo  
sapiens tyrosine kinase with immunoglobulin and epidermal growth factor  
homology domains (TIE), mRNA. /PROD=tyrosine  
kin"•4.396206123•17.44242743•tyrosine kinase with immunoglobulin-like and  
EGF-like domains 1•TIE1•Hs.78824•ENSG00000066056•6468 // protein amino acid  
phosphorylation // inferred from electronic annotation /// 7165 // signal  
transduction // traceable author statement /// 7498 // mesoderm development  
// traceable author statement•5887 // integral to plasma membrane //  
traceable author statement•4714 // transmembrane receptor protein tyrosine  
kinase activity // traceable author statement /// 4872 // receptor activity  
// inferred from electronic annotation /// 5524 // ATP binding // inferred  
from electronic annotation /// 16740 // transferase acti  
209318\_x\_at•gb:BG547855 /DB\_XREF=gi:13546520 /DB\_XREF=602576153F1  
/CLONE=IMAGE:4704108 /FEA=FLmRNA /CNT=143 /TID=Hs.75825.2 /TIER=Stack /STK=24  
/UG=Hs.75825 /LL=5325 /UG\_GENE=PLAGL1 /UG\_TITLE=pleiomorphic adenoma  
gene-like 1 /FL=gb:U72621.3•4.347391258•13.8101903•pleiomorphic adenoma  
gene-like 1•PLAGL1•Hs.444975•ENSG00000118495•"6350 // transcription //  
inferred from electronic annotation /// 6355 // regulation of transcription,  
DNA-dependent // inferred from electronic annotation /// 6917 // induction of  
apoptosis // traceable author statement /// 7050 // cell cycle arrest //  
tr"•5634 // nucleus // inferred from electronic annotation•3676 // nucleic  
acid binding // inferred from electronic annotation /// 3677 // DNA binding  
// inferred from electronic annotation /// 8270 // zinc ion binding //  
inferred from electronic annotation  
239195\_at•gb:BF791698 /DB\_XREF=gi:12096752 /DB\_XREF=602251863F1

/CLONE=IMAGE:4344375 /FEA=EST /CNT=7 /TID=Hs.318446.0 /TIER=ConsEnd /STK=1  
/UG=Hs.318446 /UG\_TITLE=ESTs\*4.300312443\*3.858460564\*  
207002\_s\_at\*"gb:NM\_002656.1 /DB\_XREF=gi:4505856 /GEN=PLAGL1 /FEA=FLmRNA  
/CNT=7 /TID=Hs.75825.1 /TIER=FL /STK=0 /UG=Hs.75825 /LL=5325 /DEF=Homo  
sapiens pleiomorphic adenoma gene-like 1 (PLAGL1), transcript variant 1,  
mRNA. /PROD=pleiomorphic adenoma gene-like 1  
isoform\*"4.208397994\*2.004847822\*pleiomorphic adenoma gene-like  
1\*PLAGL1\*Hs.444975\*ENSG00000118495\*"6350 // transcription // inferred from  
electronic annotation /// 6355 // regulation of transcription, DNA-dependent  
// inferred from electronic annotation /// 6917 // induction of apoptosis //  
traceable author statement /// 7050 // cell cycle arrest // tr\*"5634 //  
nucleus // inferred from electronic annotation\*3676 // nucleic acid binding  
// inferred from electronic annotation /// 3677 // DNA binding // inferred  
from electronic annotation /// 8270 // zinc ion binding // inferred from  
electronic annotation  
229349\_at\*"gb:AL039884 /DB\_XREF=gi:5866718 /DB\_XREF=DKFZp434F0512\_s1  
/CLONE=DKFZp434F0512 /FEA=EST /CNT=36 /TID=Hs.23616.0 /TIER=Stack /STK=16  
/UG=Hs.23616 /UG\_TITLE=ESTs\*4.136002004\*7.691544971\*FLJ16517  
protein\*FLJ16517\*Hs.23616\*ENSG00000187772\*"6355 // regulation of  
transcription, DNA-dependent // inferred from electronic annotation\*\*3677 //  
DNA binding // inferred from electronic annotation  
236987\_at\*"gb:AI741514 /DB\_XREF=gi:5109802 /DB\_XREF=wg21b12.x1  
/CLONE=IMAGE:2365727 /FEA=EST /CNT=6 /TID=Hs.24176.0 /TIER=ConsEnd /STK=6  
/UG=Hs.24176 /UG\_TITLE=ESTs\*4.110533671\*5.45150907\*  
1555976\_s\_at\*"gb:BU676221 /DB\_XREF=gi:23521013  
/DB\_XREF=UI-CF-DU1-aao-n-04-0-UI.s1 /CLONE=UI-CF-DU1-aao-n-04-0-UI  
/TID=Hs2.311412.1 /CNT=16 /FEA=mRNA /TIER=Stack /STK=9 /UG=Hs.311412  
/UG\_TITLE=Homo sapiens cDNA FLJ33153 fis, clone  
UTERU2000332."\*4.110218085\*2.568011047\*LOC440476\*\*Hs.233936\*  
1564166\_s\_at\*"gb:AK098276.1 /DB\_XREF=gi:21758257 /TID=Hs2.424660.1 /CNT=1  
/FEA=mRNA /TIER=ConsEnd /STK=0 /UG=Hs.424660 /UG\_TITLE=Homo sapiens cDNA  
FLJ40957 fis, clone UTERU2011574, moderately similar to Human PMS2 related  
(hPMSR3) gene. /DEF=Homo sapiens cDNA FLJ40957 "\*"4.107661964\*5.645290257\*PRKR  
interacting protein 1 (IL11 inducible)\*PRKRIP1\*Hs.406395\*ENSG00000128563\*  
208782\_at\*"gb:BC000055.1 /DB\_XREF=gi:12652618 /FEA=FLmRNA /CNT=480  
/TID=Hs.296267.1 /TIER=FL+Stack /STK=198 /UG=Hs.296267 /LL=11167  
/UG\_GENE=FSTL1 /DEF=Homo sapiens, follistatin-like 1, clone MGC:1993, mRNA,  
complete cds. /PROD=follistatin-like 1 /FL=gb:U06863.1  
gb:"\*4.078761079\*4.958399037\*follistatin-like  
1\*FSTL1\*Hs.269512\*ENSG00000163430\*\*5615 // extracellular space // traceable  
author statement\*5509 // calcium ion binding // inferred from electronic  
annotation /// 8201 // heparin binding // traceable author statement  
204265\_s\_at\*"gb:NM\_022107.1 /DB\_XREF=gi:11545816 /GEN=G18.2 /FEA=FLmRNA  
/CNT=61 /TID=Hs.288316.0 /TIER=FL+Stack /STK=31 /UG=Hs.288316 /LL=63940  
/DEF=Homo sapiens G18.2 protein (G18.2), mRNA. /PROD=G18.2 protein  
/FL=gb:NM\_022107.1 gb:AF155657.1\*"4.011715502\*3.681434311\*"G-protein  
signalling modulator 3 (AGS3-like, C. elegans)\*GPSM3\*Hs.520046\*\*6955 //  
immune response // non-traceable author statement /// 7165 // signal  
transduction // inferred from electronic annotation\*\*5096 // GTPase activator  
activity // inferred from electronic annotation  
211709\_s\_at\*"gb:BC005810.1 /DB\_XREF=gi:13543291 /FEA=FLmRNA /CNT=1  
/TID=HsAffx.900692.678 /TIER=FL /STK=0 /DEF=Homo sapiens, stem cell growth  
factor; lymphocyte secreted C-type lectin, clone MGC:10378, mRNA, complete  
cds. /PROD=stem cell growth factor; lymphocyte  
secr\*"3.936231097\*3.519331679\*"C-type lectin domain family 11, member A ///  
C-type lectin domain family 11, member  
A\*"CLEC11A\*Hs.512680\*ENSG00000105472\*8284 // positive regulation of cell  
proliferation // inferred from direct assay\*5576 // extracellular region //  
inferred from direct assay\*3676 // nucleic acid binding // inferred from  
electronic annotation /// 5529 // sugar binding // non-traceable author  
statement /// 8083 // growth factor activity // inferred from direct assay  
228850\_s\_at\*"gb:AI963304 /DB\_XREF=gi:5756017 /DB\_XREF=wt61d01.x1  
/CLONE=IMAGE:2511937 /FEA=EST /CNT=18 /TID=Hs.110373.0 /TIER=Stack /STK=13  
/UG=Hs.110373 /UG\_TITLE=ESTs\*3.888345286\*2.751804597\*  
204915\_s\_at\*"gb:AB028641.1 /DB\_XREF=gi:6527111 /GEN=sox11 /FEA=FLmRNA /CNT=71  
/TID=Hs.32964.0 /TIER=FL+Stack /STK=12 /UG=Hs.32964 /LL=6664 /DEF=Homo  
sapiens mRNA for SOX11, complete cds. /PROD=SOX11 /FL=gb:AB028641.1  
gb:NM\_003108.1 gb:U23752.1\*"3.850466418\*4.098805472\*SRY (sex determining  
region Y)-box 11\*SOX11\*Hs.432638\*ENSG00000176887\*"6350 // transcription //  
inferred from electronic annotation /// 6355 // regulation of transcription,  
DNA-dependent // inferred from electronic annotation /// 7399 // neurogenesis  
// traceable author statement\*"5634 // nucleus // inferred from electronic  
annotation\*3677 // DNA binding // inferred from electronic annotation  
1556429\_a\_at\*"gb:BC026969.1 /DB\_XREF=gi:20071617 /TID=Hs2.170268.1 /CNT=7  
/FEA=mRNA /TIER=ConsEnd /STK=3 /UG=Hs.170268 /UG\_TITLE=Homo sapiens, clone  
IMAGE:5116073, mRNA, partial cds /DEF=Homo sapiens, clone IMAGE:5116073,  
mRNA, partial cds."\*3.792604164\*3.678367161\*unknown MGC21654  
product\*MGC21654\*Hs.492716\*ENSG00000156787\*  
220007\_at\*"gb:NM\_024770.1 /DB\_XREF=gi:13376116 /GEN=FLJ13984 /FEA=FLmRNA  
/CNT=12 /TID=Hs.135146.0 /TIER=FL /STK=1 /UG=Hs.135146 /LL=79828 /DEF=Homo  
sapiens hypothetical protein FLJ13984 (FLJ13984), mRNA. /PROD=hypothetical

protein FLJ13984 /FL=gb:NM\_024770.1"•3.731525461•2.546563772•hypothetical  
protein FLJ13984•FLJ13984•Hs.135146•ENSG00000123600•••  
221586\_s\_at•"gb:U15642.1 /DB\_XREF=gi:758415 /FEA=FLmRNA /CNT=51  
/TID=Hs.2331.0 /TIER=FL /STK=0 /UG=Hs.2331 /LL=1875 /UG\_GENE=E2F5 /DEF=Human  
transcription factor E2F-5 mRNA, complete cds. /PROD=E2F-5 /FL=gb:U15642.1  
gb:NM\_001951.2 gb:U31556.1"•3.719645472•3.914098684•"E2F transcription factor  
5, p130-binding"•E2F5•Hs.445758•ENSG00000133740•"74 // regulation of cell  
cycle // traceable author statement /// 6350 // transcription // inferred  
from electronic annotation /// 6355 // regulation of transcription,  
DNA-dependent // inferred from electronic annotation"•5634 // nucleus //  
inferred from electronic annotation /// 5667 // transcription factor complex  
// inferred from electronic annotation•3700 // transcription factor activity  
// non-traceable author statement /// 5515 // protein binding // traceable  
author statement  
238520\_at•gb:BF724270 /DB\_XREF=gi:12040179 /DB\_XREF=bx02h06.x1 /CLONE=bx02h06  
/FEA=EST /CNT=11 /TID=Hs.123364.0 /TIER=ConsEnd /STK=1 /UG=Hs.123364  
/UG\_TITLE=ESTs•3.682669551•2.65589233•Transcriptional regulating factor  
1•TRERF1•Hs.485392•ENSG00000124496•"6355 // regulation of transcription,  
DNA-dependent // inferred from electronic annotation /// 6694 // steroid  
biosynthesis // non-traceable author statement /// 6707 // cholesterol  
catabolism // non-traceable author statement /// 7275 // development //  
no"•5634 // nucleus // inferred from direct assay /// 5634 // nucleus //  
inferred from electronic annotation•3677 // DNA binding // inferred from  
electronic annotation /// 3700 // transcription factor activity // inferred  
from direct assay /// 8134 // transcription factor binding // inferred from  
physical interaction /// 8270 // zinc ion binding // inferred from  
228158\_at•gb:AI623211 /DB\_XREF=gi:4648136 /DB\_XREF=ts78e11.x1  
/CLONE=IMAGE:2237420 /FEA=EST /CNT=24 /TID=Hs.56729.3 /TIER=Stack /STK=17  
/UG=Hs.56729 /LL=4046 /UG\_GENE=LSP1 /UG\_TITLE=lymphocyte-specific protein  
1•3.67743156•3.220717838•similar to D(1B) dopamine receptor (D(5) dopamine  
receptor) (D1beta dopamine receptor)•LOC440684•Hs.456465••7186 // G-protein  
coupled receptor protein signaling pathway // inferred from electronic  
annotation•16021 // integral to membrane // inferred from electronic  
annotation•1584 // rhodopsin-like receptor activity // inferred from  
electronic annotation /// 4872 // receptor activity // inferred from  
electronic annotation /// 4952 // dopamine receptor activity // inferred from  
electronic annotation  
213558\_at•"gb:AB011131.1 /DB\_XREF=gi:3043641 /GEN=KIAA0559 /FEA=mRNA /CNT=37  
/TID=Hs.12376.1 /TIER=Stack /STK=8 /UG=Hs.12376 /LL=27445 /DEF=Homo sapiens  
mRNA for KIAA0559 protein, partial cds. /PROD=KIAA0559  
protein"•3.604456718•3.339010098•piccolo (presynaptic cytomatrix  
protein)•PCLO•Hs.12376••6810 // transport // inferred from electronic  
annotation /// 7010 // cytoskeleton organization and biogenesis // inferred  
from sequence or structural similarity /// 16080 // synaptic vesicle  
targeting // inferred from sequence or structural similarity•5856 //  
cytoskeleton // non-traceable author statement /// 8021 // synaptic vesicle  
// inferred from electronic annotation /// 16020 // membrane // inferred from  
electronic annotation /// 45202 // synapse // inferred from sequence or  
structural similarity•5198 // structural molecule activity // inferred from  
electronic annotation /// 5215 // transporter activity // inferred from  
electronic annotation /// 5509 // calcium ion binding // inferred from  
sequence or structural similarity /// 5522 // profilin bin  
204913\_s\_at•gb:AI360875 /DB\_XREF=gi:4112496 /DB\_XREF=qy01c03.x1  
/CLONE=IMAGE:2010724 /FEA=FLmRNA /CNT=71 /TID=Hs.32964.0 /TIER=Stack /STK=12  
/UG=Hs.32964 /LL=6664 /UG\_GENE=SOX11 /UG\_TITLE=SRY (sex determining region  
Y)-box 11 /FL=gb:AB028641.1 gb:NM\_003108.1  
gb:U2375•3.598921652•4.84068802•SRY (sex determining region Y)-box  
11•SOX11•Hs.432638•ENSG00000176887•"6350 // transcription // inferred from  
electronic annotation /// 6355 // regulation of transcription, DNA-dependent  
// inferred from electronic annotation /// 7399 // neurogenesis // traceable  
author statement"•5634 // nucleus // inferred from electronic annotation•3677  
// DNA binding // inferred from electronic annotation  
241682\_at•"gb:BE873351 /DB\_XREF=gi:10322127 /DB\_XREF=601450410F1  
/CLONE=IMAGE:3854163 /FEA=EST /CNT=8 /TID=Hs.171443.0 /TIER=ConsEnd /STK=0  
/UG=Hs.171443 /UG\_TITLE=ESTs, Weakly similar to actin binding protein MAYVEN  
(H.sapiens)"•3.587757439•3.996615106•hypothetical protein  
MGC2610•MGC2610•Hs.470549•ENSG00000144362•••5515 // protein binding //  
inferred from electronic annotation  
226429\_at•gb:BE218238 /DB\_XREF=gi:8905556 /DB\_XREF=hv36a10.x1  
/CLONE=IMAGE:3175482 /FEA=mRNA /CNT=50 /TID=Hs.283709.3 /TIER=Stack /STK=9  
/UG=Hs.283709 /LL=55425 /UG\_GENE=LSR7 /UG\_TITLE=lipopolysaccharide specific  
response-7  
protein•3.499351417•5.027113126•KIAA1704•KIAA1704•Hs.507922•ENSG00000133114•••  
229657\_at•gb:BF431989 /DB\_XREF=gi:11444103 /DB\_XREF=nab84a05.x1  
/CLONE=IMAGE:3274280 /FEA=EST /CNT=15 /TID=Hs.203213.1 /TIER=Stack /STK=12  
/UG=Hs.203213 /UG\_TITLE=ESTs•3.489655869•2.67109826•Hypothetical gene  
supported by AK096885; AK098084••Hs.551610••••  
204914\_s\_at•gb:AW157202 /DB\_XREF=gi:6228603 /DB\_XREF=au92g06.x1  
/CLONE=IMAGE:2783770 /FEA=FLmRNA /CNT=71 /TID=Hs.32964.0 /TIER=Stack /STK=8  
/UG=Hs.32964 /LL=6664 /UG\_GENE=SOX11 /UG\_TITLE=SRY (sex determining region  
Y)-box 11 /FL=gb:AB028641.1 gb:NM\_003108.1



gb:U23752•3.461887423•4.328038868•SRY (sex determining region Y)-box  
11•SOX11•Hs.432638•ENSG00000176887•"6350 // transcription // inferred from  
electronic annotation /// 6355 // regulation of transcription, DNA-dependent  
// inferred from electronic annotation /// 7399 // neurogenesis // traceable  
author statement"•5634 // nucleus // inferred from electronic annotation•3677  
// DNA binding // inferred from electronic annotation  
226982\_at•"gb:AI745624 /DB\_XREF=gi:5113912 /DB\_XREF=wc33h03.x1  
/CLONE=IMAGE:2317013 /FEA=EST /CNT=41 /TID=Hs.173334.0 /TIER=Stack /STK=25  
/UG=Hs.173334 /LL=22936 /UG\_GENE=ELL2 /UG\_TITLE=ELL-RELATED RNA POLYMERASE  
II, ELONGATION FACTOR"•3.448554128•5.862095008•"Elongation factor, RNA  
polymerase II, 2"•ELL2•Hs.192221•ENSG00000118985•"6350 // transcription //  
inferred from electronic annotation /// 6355 // regulation of transcription,  
DNA-dependent // inferred from electronic annotation /// 6368 // RNA  
elongation from RNA polymerase II promoter // traceable author  
statement"•5634 // nucleus // inferred from electronic annotation /// 8023 //  
transcription elongation factor complex // traceable author statement•3702 //  
RNA polymerase II transcription factor activity // traceable author  
statement  
225897\_at•"gb:AI709406 /DB\_XREF=gi:4999182 /DB\_XREF=as37d05.x1  
/CLONE=IMAGE:2319369 /FEA=mRNA /CNT=71 /TID=Hs.330716.0 /TIER=Stack /STK=9  
/UG=Hs.330716 /UG\_TITLE=Homo sapiens mRNA, 3UTR, up-regulated by  
BCG-CWS"•3.432744271•3.202863545•Myristoylated alanine-rich protein kinase C  
substrate•MARCKS•Hs.519909•ENSG00000155130•6928 // cell motility // not  
recorded•5886 // plasma membrane // not recorded /// 15629 // actin  
cytoskeleton // traceable author statement•5516 // calmodulin binding //  
traceable author statement /// 51015 // actin filament binding // traceable  
author statement  
226611\_s\_at•gb:AA722878 /DB\_XREF=gi:2740585 /DB\_XREF=zg89f10.s1  
/CLONE=IMAGE:409771 /FEA=EST /CNT=47 /TID=Hs.326184.0 /TIER=Stack /STK=27  
/UG=Hs.326184 /UG\_TITLE=ESTs•3.400473388•3.009376866•proline rich  
6•PRR6•Hs.433422•ENSG00000166582•8152 // metabolism // inferred from  
electronic annotation•16846 // carbon-sulfur lyase activity // inferred from  
electronic annotation  
237411\_at•gb:N71063 /DB\_XREF=gi:1227643 /DB\_XREF=za86a11.s1  
/CLONE=IMAGE:299420 /FEA=EST /CNT=5 /TID=Hs.38173.0 /TIER=ConsEnd /STK=5  
/UG=Hs.38173 /UG\_TITLE=ESTs•3.390882319•8.659032723•"a disintegrin-like and  
metalloprotease (reprolysin type) with thrombospondin type 1 motif,  
6"•ADAMTS6•Hs.344757•ENSG0000049192•6508 // proteolysis and peptidolysis //  
inferred from electronic annotation•5578 // extracellular matrix (sensu  
Metazoa) // inferred from electronic annotation /// 31012 // extracellular  
matrix // inferred from electronic annotation•4222 // metalloendopeptidase  
activity // inferred from electronic annotation /// 8233 // peptidase  
activity // inferred from electronic annotation /// 8270 // zinc ion binding  
// inferred from electronic annotation  
226610\_at•gb:AA722878 /DB\_XREF=gi:2740585 /DB\_XREF=zg89f10.s1  
/CLONE=IMAGE:409771 /FEA=EST /CNT=47 /TID=Hs.326184.0 /TIER=Stack /STK=27  
/UG=Hs.326184 /UG\_TITLE=ESTs•3.383031406•2.085314982•proline rich  
6•PRR6•Hs.433422•ENSG00000166582•8152 // metabolism // inferred from  
electronic annotation•16846 // carbon-sulfur lyase activity // inferred from  
electronic annotation  
227399\_at•gb:AI754423 /DB\_XREF=gi:5132687 /DB\_XREF=cr25b07.x1  
/CLONE=HBMSC\_cr25b07 /FEA=EST /CNT=67 /TID=Hs.30343.0 /TIER=Stack /STK=23  
/UG=Hs.30343 /UG\_TITLE=ESTs•3.3225196•6.276333749•vestigial-like  
3•VGL-3•Hs.435013••45449 // regulation of transcription // inferred from  
electronic annotation•5634 // nucleus // inferred from electronic  
annotation•30528 // transcription regulator activity // inferred from  
electronic annotation  
209604\_s\_at•"gb:BC003070.1 /DB\_XREF=gi:13111765 /FEA=FLmRNA /CNT=105  
/TID=Hs.169946.0 /TIER=FL /STK=0 /UG=Hs.169946 /LL=2625 /UG\_GENE=GATA3  
/DEF=Homo sapiens, GATA-binding protein 3, clone MGC:2346, mRNA, complete  
cds. /PROD=GATA-binding protein 3 /FL=gb:NM\_002051.1  
g"•3.294185372•13.52594972•GATA binding protein  
3•GATA3•Hs.524134•ENSG00000107485•"6350 // transcription // inferred from  
electronic annotation /// 6355 // regulation of transcription, DNA-dependent  
// inferred from electronic annotation /// 6366 // transcription from RNA  
polymerase II promoter // traceable author statement /// 6952 // "•5634 //  
nucleus // inferred from electronic annotation•3700 // transcription factor  
activity // traceable author statement  
242828\_at•gb:BG109695 /DB\_XREF=gi:12603201 /DB\_XREF=602280828F1  
/CLONE=IMAGE:4368415 /FEA=EST /CNT=5 /TID=Hs.170999.0 /TIER=ConsEnd /STK=0  
/UG=Hs.170999  
/UG\_TITLE=ESTs•3.280115561•3.090523309•Fidgetin•FIGN•Hs.170999•ENSG00000182263  
•6457 // protein folding // inferred from electronic annotation•5739 //  
mitochondrion // inferred from electronic annotation•166 // nucleotide  
binding // inferred from electronic annotation /// 5524 // ATP binding //  
inferred from electronic annotation /// 17111 // nucleoside-triphosphatase  
activity // inferred from electronic annotation /// 51082 // unfolded protein  
binding //  
227828\_s\_at•gb:AV700753 /DB\_XREF=gi:10302724 /DB\_XREF=AV700753  
/CLONE=GKCBZEO6 /FEA=mRNA /CNT=42 /TID=Hs.75576.1 /TIER=Stack /STK=18  
/UG=Hs.75576 /LL=5340 /UG\_GENE=PLG

/UG\_TITLE=plasminogen\*3.255977507\*3.40355209\*hypothetical protein  
FLJ13391\*FLJ13391\*Hs.549210\*ENSG00000115363\*\*\*  
208998\_at\*"gb:U94592.1 /DB\_XREF=gi:2052354 /GEN=UCPH /FEA=FLmRNA /CNT=226  
/TID=Hs.80658.0 /TIER=FL /STK=1 /UG=Hs.80658 /LL=7351 /DEF=Human uncoupling  
protein homolog (UCPH) mRNA, complete cds. /PROD=uncoupling protein homolog  
/FL=gb:U76367.1 gb:U82819.1 gb:U94592.1 "\*3.239466043\*2.950002776\*"uncoupling  
protein 2 (mitochondrial, proton carrier)"\*UCP2\*Hs.80658\*ENSG00000175567\*6810  
// transport // non-traceable author statement /// 6839 // mitochondrial  
transport // inferred from electronic annotation /// 15992 // proton  
transport // traceable author statement\*5624 // membrane fraction // not  
recorded /// 5739 // mitochondrion // inferred from electronic annotation ///  
5743 // mitochondrial inner membrane // non-traceable author statement ///  
16021 // integral to membrane // inferred from electronic annotation\*5215 //  
transporter activity // inferred from electronic annotation /// 5488 //  
binding // inferred from electronic annotation  
209156\_s\_at\*"gb:AY029208.1 /DB\_XREF=gi:13603393 /GEN=COL6A2 /FEA=FLmRNA  
/CNT=294 /TID=Hs.159263.1 /TIER=FL+Stack /STK=223 /UG=Hs.159263 /LL=1292  
/DEF=Homo sapiens type VI collagen alpha 2 chain precursor (COL6A2) mRNA,  
complete cds, alternatively spliced. /PROD=type  
V"\*3.232952315\*7.275632454\*"collagen, type VI, alpha  
2"\*COL6A2\*Hs.420269\*ENSG00000142173\*6817 // phosphate transport // inferred  
from electronic annotation /// 16337 // cell-cell adhesion // non-traceable  
author statement /// 30198 // extracellular matrix organization and  
biogenesis // non-traceable author statement\*5581 // collagen // inferred  
from electronic annotation /// 5737 // cytoplasm // inferred from electronic  
annotation\*5201 // extracellular matrix structural constituent //  
non-traceable author statement /// 30674 // protein binding, bridging //  
non-traceable author statement"  
223791\_at\*"gb:BC002886.1 /DB\_XREF=gi:12804066 /FEA=FLmRNA /CNT=12  
/TID=Hs.191817.0 /TIER=FL /STK=7 /UG=Hs.191817 /DEF=Homo sapiens, clone  
MGC:11241, mRNA, complete cds. /PROD=Unknown (protein for MGC:11241)  
/FL=gb:BC002886.1"\*3.198896814\*2.418687642\*Hypothetical gene supported by  
AK131029; BC002886 /// Hypothetical gene supported by AK131029;  
BC002886\*\*Hs.455306 /// Hs.455316\*\*\*\*  
212057\_at\*gb:AA206161 /DB\_XREF=gi:1801720 /DB\_XREF=zq55f01.s1  
/CLONE=IMAGE:645529 /FEA=mRNA /CNT=291 /TID=Hs.75909.0 /TIER=Stack /STK=17  
/UG=Hs.75909 /LL=23199 /UG\_GENE=KIAA0182 /UG\_TITLE=KIAA0182  
protein\*3.189229052\*2.927669133\*KIAA0182  
protein\*KIAA0182\*Hs.461647\*ENSG00000131149\*\*\*  
201859\_at\*"gb:NM\_002727.1 /DB\_XREF=gi:4506044 /GEN=PRG1 /FEA=FLmRNA /CNT=337  
/TID=Hs.1908.0 /TIER=FL+Stack /STK=97 /UG=Hs.1908 /LL=5552 /DEF=Homo sapiens  
proteoglycan 1, secretory granule (PRG1), mRNA. /PROD=proteoglycan 1,  
secretory granule /FL=gb:J03223.1  
gb:NM\_00"\*3.160232569\*2.837484849\*"proteoglycan 1, secretory  
granule"\*PRG1\*Hs.1908\*ENSG00000122862\*\*\*  
242979\_at\*gb:AI474666 /DB\_XREF=gi:4327711 /DB\_XREF=tm35e04.x1  
/CLONE=IMAGE:2160126 /FEA=EST /CNT=5 /TID=Hs.257786.0 /TIER=ConsEnd /STK=2  
/UG=Hs.257786 /UG\_TITLE=ESTs\*3.15621762\*2.334431177\*Transcribed  
locus\*\*Hs.257786\*\*\*\*  
1555673\_at\*"gb:BC012486.1 /DB\_XREF=gi:15214703 /TID=Hs2Affx.1.428 /CNT=1  
/FEA=FLmRNA /TIER=FL /STK=1 /NOTE=sequence(s) not in UniGene /DEF=Homo  
sapiens, clone MGC:21715 IMAGE:4472166, mRNA, complete cds. /PROD=Unknown  
(protein for MGC:21715) /FL=gb:BC012486.1"\*3.137401525\*5.312916997\*keratin  
associated protein 2-1 /// keratin associated protein 2-4\*KRTAP2-1 ///  
KRTAP2-4\*Hs.528921\*ENSG00000196103 /// ENSG00000184928\*\*45095 // keratin  
filament // inferred from electronic annotation\*  
209946\_at\*"gb:U58111.1 /DB\_XREF=gi:1373426 /FEA=FLmRNA /CNT=61  
/TID=Hs.79141.0 /TIER=FL /STK=2 /UG=Hs.79141 /LL=7424 /UG\_GENE=VEGFC  
/DEF=Human FLT4 ligand mRNA, complete cds. /PROD=FLT4 ligand DHM  
/FL=gb:NM\_005429.1 gb:U43142.1 gb:U58111.1"\*3.134866502\*4.636488185\*vascular  
endothelial growth factor C\*VEGFC\*Hs.435215\*ENSG00000150630\*74 // regulation  
of cell cycle // inferred from electronic annotation /// 1525 // angiogenesis  
// inferred from electronic annotation /// 6929 // substrate-bound cell  
migration // traceable author statement /// 7165 // signal transduction //  
traceable aut\*16020 // membrane // inferred from electronic annotation\*8083  
// growth factor activity // inferred from electronic annotation  
221730\_at\*"gb:NM\_000393.1 /DB\_XREF=gi:4502958 /GEN=COL5A2 /FEA=FLmRNA  
/CNT=405 /TID=Hs.82985.0 /TIER=FL+Stack /STK=45 /UG=Hs.82985 /LL=1290  
/DEF=Homo sapiens collagen, type V, alpha 2 (COL5A2), mRNA. /PROD=collagen,  
type V, alpha 2 /FL=gb:NM\_000393.1"\*3.130016476\*2.819486983\*"collagen, type  
V, alpha 2"\*COL5A2\*Hs.445827\*\*6817 // phosphate transport // inferred from  
electronic annotation\*5581 // collagen // inferred from electronic annotation  
/// 5588 // collagen type V // traceable author statement /// 5737 //  
cytoplasm // inferred from electronic annotation\*5201 // extracellular matrix  
structural constituent // not recorded  
218880\_at\*gb:N36408 /DB\_XREF=gi:1157550 /DB\_XREF=yy33f03.s1  
/CLONE=IMAGE:273053 /FEA=FLmRNA /CNT=53 /TID=Hs.325364.0 /TIER=Stack /STK=12  
/UG=Hs.325364 /LL=79579 /UG\_GENE=FLJ23306 /UG\_TITLE=hypothetical protein  
FLJ23306 /FL=gb:NM\_024530.1\*3.122846284\*2.50537457\*FOS-like antigen  
2\*FOSL2\*Hs.220971\*ENSG00000075426\*6357 // regulation of transcription from  
RNA polymerase II promoter // traceable author statement /// 8219 // cell

death // traceable author statement•5634 // nucleus // traceable author statement•3700 // transcription factor activity // traceable author statement  
215933\_s\_at•gb:Z21533.1 /DB\_XREF=gi:32068 /GEN=HEX /FEA=mRNA /CNT=2 /TID=Hs.118651.1 /TIER=ConsEnd /STK=0 /UG=Hs.118651 /LL=3087 /DEF=H.sapiens HEX gene encoding homeobox related protein. /PROD=homeobox related protein•3.102967533•4.379330831•hematopoietically expressed homeobox•HHEX•Hs.118651•ENSG00000152804•"6355 // regulation of transcription, DNA-dependent // inferred from electronic annotation /// 7275 // development // traceable author statement /// 19735 // antimicrobial humoral response (sensu Vertebrata) // traceable author statement"•5634 // nucleus // inferred from electronic annotation /// 5634 // nucleus // not recorded•3700 // transcription factor activity // inferred from electronic annotation /// 3700 // transcription factor activity // traceable author statement  
201792\_at•"gb:NM\_001129.2 /DB\_XREF=gi:4755145 /GEN=AEBP1 /FEA=FLmRNA /CNT=208 /TID=Hs.118397.0 /TIER=FL+Stack /STK=78 /UG=Hs.118397 /LL=165 /DEF=Homo sapiens AE-binding protein 1 (AEBP1), mRNA. /PROD=adipocyte enhancer binding protein 1 precursor /FL=gb:AF053944.1 g"•3.091870165•3.305067656•AE binding protein 1•AEBP1•Hs.439463•ENSG00000106624•1501 // skeletal development // traceable author statement /// 6508 // proteolysis and peptidolysis // inferred from electronic annotation /// 7155 // cell adhesion // inferred from electronic annotation /// 7517 // muscle development // traceable author •5737 // cytoplasm // not recorded•3700 // transcription factor activity // traceable author statement /// 4180 // carboxypeptidase activity // traceable author statement /// 4182 // carboxypeptidase A activity // inferred from electronic annotation  
31845\_at•"Cluster Incl. U32645:Human myeloid elf-1 like factor (MEF) mRNA, complete cds /cds=(382,2373) /gb=U32645 /gi=1761934 /ug=Hs.151139 /len=4167"•3.062837053•3.094320715•E74-like factor 4 (ets domain transcription factor)•ELF4•Hs.271940•ENSG00000102034•"6355 // regulation of transcription, DNA-dependent // non-traceable author statement /// 6357 // regulation of transcription from RNA polymerase II promoter // inferred from direct assay"•5634 // nucleus // inferred from electronic annotation /// 5634 // nucleus // non-traceable author statement /// 16605 // PML body // inferred from direct assay•3700 // transcription factor activity // inferred from electronic annotation /// 3700 // transcription factor activity // non-traceable author statement /// 3713 // transcription coactivator activity // traceable author statement /// 16563 // transcriptio  
201466\_s\_at•"gb:NM\_002228.2 /DB\_XREF=gi:7710122 /GEN=JUN /FEA=FLmRNA /CNT=376 /TID=Hs.78465.0 /TIER=FL+Stack /STK=45 /UG=Hs.78465 /LL=3725 /DEF=Homo sapiens v-jun avian sarcoma virus 17 oncogene homolog (JUN), mRNA. /PROD=v-jun avian sarcoma virus 17 oncogene homolog "•3.062721613•2.259279209•v-jun sarcoma virus 17 oncogene homolog (avian)•JUN•Hs.525704•ENSG00000177606•"6350 // transcription // inferred from electronic annotation /// 6355 // regulation of transcription, DNA-dependent // inferred from electronic annotation"•228 // nuclear chromosome // traceable author statement•3700 // transcription factor activity // traceable author statement /// 3702 // RNA polymerase II transcription factor activity // traceable author statement /// 8134 // transcription factor binding // inferred from physical interaction  
205122\_at•gb:BF439316 /DB\_XREF=gi:11451833 /DB\_XREF=nab62g12.x1 /CLONE=IMAGE:3272638 /FEA=FLmRNA /CNT=65 /TID=Hs.78531.0 /TIER=Stack /STK=27 /UG=Hs.78531 /LL=8577 /UG\_GENE=TMEFF1 /UG\_TITLE=transmembrane protein with EGF-like and two follistatin-like domains 1 /FL=g•3.01499751•5.539378111•transmembrane protein with EGF-like and two follistatin-like domains 1•TMEFF1•Hs.336224•ENSG00000066697••16021 // integral to membrane // inferred from electronic annotation•  
219410\_at•"gb:NM\_018004.1 /DB\_XREF=gi:8922242 /GEN=FLJ10134 /FEA=FLmRNA /CNT=36 /TID=Hs.104800.0 /TIER=FL+Stack /STK=20 /UG=Hs.104800 /LL=55076 /DEF=Homo sapiens hypothetical protein FLJ10134 (FLJ10134), mRNA. /PROD=hypothetical protein FLJ10134 /FL=gb:NM\_018004.1"•2.948642219•3.089077777•transmembrane protein 45A•TMEM45A•Hs.126598•ENSG00000181458••16021 // integral to membrane // inferred from electronic annotation•  
236916\_at•gb:AU151944 /DB\_XREF=gi:11013465 /DB\_XREF=AU151944 /CLONE=NT2RP2006434 /FEA=EST /CNT=6 /TID=Hs.13997.0 /TIER=ConsEnd /STK=5 /UG=Hs.13997 /UG\_TITLE=ESTs•2.935480082•2.334211919•Transcribed locus••Hs.13997••••  
229404\_at•"gb:AI086614 /DB\_XREF=gi:3425037 /DB\_XREF=oz76e09.x1 /CLONE=IMAGE:1681288 /FEA=EST /CNT=31 /TID=Hs.32366.0 /TIER=Stack /STK=8 /UG=Hs.32366 /UG\_TITLE=ESTs, Highly similar to G01204 twist protein homolog (H.sapiens)"•2.926777138•4.214082045•twist homolog 2 (Drosophila)•TWIST2•Hs.422585••6350 // transcription // inferred from electronic annotation /// 30154 // cell differentiation // inferred from electronic annotation /// 45668 // negative regulation of osteoblast differentiation // inferred from direct assay /// 45892 // negative regula•5634 // nucleus // inferred from direct assay /// 5737 // cytoplasm // inferred from direct assay•3677 // DNA binding // inferred from electronic annotation /// 16564 // transcriptional repressor activity // inferred from sequence or structural similarity  
212364\_at•"gb:BF432550 /DB\_XREF=gi:11444700 /DB\_XREF=nac56e10.x1

/CLONE=IMAGE:3406555 /FEA=mRNA /CNT=213 /TID=Hs.121576.0 /TIER=Stack /STK=27 /UG=Hs.121576 /UG\_TITLE=Homo sapiens cDNA FLJ20153 fis, clone COL08656, highly similar to AJ001381 Homo sapiens incomplete c"•2.92223405•3.096626406•myosin IB•MYO1B•Hs.439620•ENSG00000128641••16459 // myosin // inferred from electronic annotation•3774 // motor activity // inferred from electronic annotation /// 3779 // actin binding // inferred from electronic annotation /// 5516 // calmodulin binding // inferred from electronic annotation /// 5524 // ATP binding // inferred from electronic annota

209875\_s\_at•"gb:M83248.1 /DB\_XREF=gi:189150 /GEN=nephropontin /FEA=FLmRNA /CNT=157 /TID=Hs.313.0 /TIER=FL /STK=0 /UG=Hs.313 /LL=6696 /DEF=Human nephropontin mRNA, complete cds. /PROD=nephropontin /FL=gb:M83248.1"•2.910671599•4.289451111"secreted phosphoprotein 1 (osteopontin, bone sialoprotein I, early T-lymphocyte activation 1)"•SPP1•Hs.313•ENSG00000118785•1503 // ossification // inferred from electronic annotation /// 1503 // ossification // traceable author statement /// 6916 // anti-apoptosis // inferred from sequence or structural similarity /// 7155 // cell adhesion // inferred from electronic annotati•5578 // extracellular matrix (sensu Metazoa) // traceable author statement•5125 // cytokine activity // inferred from sequence or structural similarity /// 5178 // integrin binding // non-traceable author statement /// 5515 // protein binding // inferred from electronic annotation /// 8083 // growth factor activity // traceable

1552309\_a\_at•"gb:NM\_144573.1 /DB\_XREF=gi:21389338 /GEN=nexilin /TID=Hs2.216381.1 /CNT=24 /FEA=FLmRNA /TIER=FL+Stack /STK=8 /LL=91624 /UG=Hs.216381 /DEF=Homo sapiens likely ortholog of rat F-actin binding protein nexilin (nexilin), mRNA. /PROD=likely ortholog of rat F-a"•2.905285743•7.01404278•nexilin (F actin binding protein)•NEXN•Hs.22370•ENSG00000162614•••

204823\_at•"gb:NM\_014903.1 /DB\_XREF=gi:7662389 /GEN=KIAA0938 /FEA=FLmRNA /CNT=57 /TID=Hs.174188.0 /TIER=FL+Stack /STK=20 /UG=Hs.174188 /LL=22840 /DEF=Homo sapiens KIAA0938 protein (KIAA0938), mRNA. /PROD=KIAA0938 protein /FL=gb:AB023155.1 gb:NM\_014903.1"•2.891980906•7.250994048•neuron navigator 3•NAV3•Hs.306322•ENSG00000067798••5739 // mitochondrion // inferred from electronic annotation•166 // nucleotide binding // inferred from electronic annotation /// 5524 // ATP binding // inferred from electronic annotation /// 17111 // nucleoside-triphosphatase activity // inferred from electronic annotation

200790\_at•gb:NM\_002539.1 /DB\_XREF=gi:4505488 /GEN=ODC1 /FEA=FLmRNA /CNT=464 /TID=Hs.75212.0 /TIER=FL+Stack /STK=132 /UG=Hs.75212 /LL=4953 /DEF=Homo sapiens ornithine decarboxylase 1 (ODC1) mRNA. /PROD=ornithine decarboxylase 1 /FL=gb:NM\_002539.1 gb:M16650.1"•2.885516899•2.806448519•ornithine decarboxylase 1•ODC1•Hs.467701•ENSG00000115758•6596 // polyamine biosynthesis // non-traceable author statement••4586 // ornithine decarboxylase activity // traceable author statement /// 16829 // lyase activity // inferred from electronic annotation

204689\_at•"gb:NM\_001529.1 /DB\_XREF=gi:10835016 /GEN=HHEX /FEA=FLmRNA /CNT=50 /TID=Hs.118651.0 /TIER=FL+Stack /STK=25 /UG=Hs.118651 /LL=3087 /DEF=Homo sapiens hematopoietically expressed homeobox (HHEX), mRNA. /PROD=hematopoietically expressed homeobox /FL=gb:NM\_0015"•2.882766955•3.396837896•hematopoietically expressed homeobox•HHEX•Hs.118651•ENSG00000152804"•6355 // regulation of transcription, DNA-dependent // inferred from electronic annotation /// 7275 // development // traceable author statement /// 19735 // antimicrobial humoral response (sensu Vertebrata) // traceable author statement"•5634 // nucleus // inferred from electronic annotation /// 5634 // nucleus // not recorded•3700 // transcription factor activity // inferred from electronic annotation /// 3700 // transcription factor activity // traceable author statement

243514\_at•gb:AI475902 /DB\_XREF=gi:4328947 /DB\_XREF=tc95f02.xl /CLONE=IMAGE:2073915 /FEA=EST /CNT=5 /TID=Hs.143056.0 /TIER=ConsEnd /STK=1 /UG=Hs.143056 /UG\_TITLE=ESTs•2.863185701•5.620230464••••••••

204602\_at•"gb:NM\_012242.1 /DB\_XREF=gi:7110718 /GEN=DKK1 /FEA=FLmRNA /CNT=108 /TID=Hs.40499.0 /TIER=FL /STK=0 /UG=Hs.40499 /LL=22943 /DEF=Homo sapiens dickkopf (Xenopus laevis) homolog 1 (DKK1), mRNA. /PROD=dickkopf (Xenopus laevis) homolog 1 /FL=gb:AF177394.1 gb:NM\_"•2.861384986•2.873163864•dickkopf homolog 1 (Xenopus laevis)•DKK1•Hs.40499•ENSG00000107984•7275 // development // inferred from electronic annotation /// 16055 // Wnt receptor signaling pathway // inferred from electronic annotation /// 30178 // negative regulation of Wnt receptor signaling pathway // inferred from electronic annotation•5576 // extracellular region // inferred from electronic annotation•4871 // signal transducer activity // traceable author statement /// 8083 // growth factor activity // traceable author statement

225095\_at•gb:W81119 /DB\_XREF=gi:1391618 /DB\_XREF=zh49e09.s1 /CLONE=IMAGE:415432 /FEA=EST /CNT=115 /TID=Hs.315482.0 /TIER=Stack /STK=12 /UG=Hs.315482 /UG\_TITLE=ESTs•2.846599813•2.146861753"Serine palmitoyltransferase, long chain base subunit 2"•SPTLC2•Hs.435661•ENSG00000100596•9058 // biosynthesis // inferred from electronic annotation•5783 // endoplasmic reticulum // inferred from electronic annotation /// 16021 // integral to membrane // inferred from electronic annotation"•4758 // serine C-palmitoyltransferase activity // traceable author statement /// 8415 // acyltransferase activity // inferred

from electronic annotation /// 16769 // transferase activity, transferring nitrogenous groups // inferred from electronic annotat  
225262\_at\*"gb:AI670862 /DB\_XREF=gi:4850593 /DB\_XREF=wa06b06.x1 /CLONE=IMAGE:2297267 /FEA=EST /CNT=74 /TID=Hs.5890.1 /TIER=Stack /STK=18 /UG=Hs.5890 /UG\_TITLE=ESTs, Weakly similar to A49134 Ig kappa chain V-I region (H.sapiens)"\*2.832099821\*4.854189153\*FOS-like antigen 2\*FOSL2\*Hs.220971\*ENSG00000075426\*6357 // regulation of transcription from RNA polymerase II promoter // traceable author statement /// 8219 // cell death // traceable author statement\*5634 // nucleus // traceable author statement\*3700 // transcription factor activity // traceable author statement  
235976\_at\*"gb:AI680986 /DB\_XREF=gi:4891168 /DB\_XREF=tx43a12.x1 /CLONE=IMAGE:2272318 /FEA=EST /CNT=6 /TID=Hs.120910.0 /TIER=ConsEnd /STK=5 /UG=Hs.120910 /UG\_TITLE=ESTs\*2.827163064\*2.304388409\*"SLIT and NTRK-like family, member 6"\*SLITRK6\*Hs.525105\*ENSG00000184564\*\*16021 // integral to membrane // inferred from electronic annotation\*  
215011\_at\*"gb:AJ006835.1 /DB\_XREF=gi:3236105 /FEA=mRNA /CNT=7 /TID=Hs.196769.0 /TIER=ConsEnd /STK=0 /UG=Hs.196769 /LL=8420 /UG\_GENE=RNU17D /UG\_TITLE=RNA, U17D small nucleolar /DEF=Homo sapiens RNA transcript from U17 small nucleolar RNA host gene, variant U17HG-AB."\*2.805041138\*3.185930243\*"RNA, U17D small nucleolar"\*RNU17D\*\*\*\*  
207325\_x\_at\*"gb:NM\_004988.1 /DB\_XREF=gi:4826821 /GEN=MAGEA1 /FEA=FLmRNA /CNT=6 /TID=Hs.72879.0 /TIER=FL /STK=1 /UG=Hs.72879 /LL=4100 /DEF=Homo sapiens melanoma antigen, family A, 1 (directs expression of antigen MZ2-E) (MAGEA1), mRNA. /PROD=melanoma antigen, family A,"\*2.77615688\*2.776163583\*"melanoma antigen family A, 1 (directs expression of antigen MZ2-E)"\*MAGEA1\*Hs.72879\*ENSG00000126977\*\*5886 // plasma membrane // traceable author statement\*  
220014\_at\*"gb:NM\_016644.1 /DB\_XREF=gi:7706193 /GEN=LOC51334 /FEA=FLmRNA /CNT=15 /TID=Hs.157461.0 /TIER=FL /STK=3 /UG=Hs.157461 /LL=51334 /DEF=Homo sapiens mesenchymal stem cell protein DSC54 (LOC51334), mRNA. /PROD=mesenchymal stem cell protein DSC54 /FL=gb:NM\_01664\*"\*2.769645263\*2.439863893\*mesenchymal stem cell protein DSC54\*LOC51334\*Hs.157461\*ENSG00000184838\*\*\*  
225656\_at\*"gb:AI564473 /DB\_XREF=gi:4522930 /DB\_XREF=tq57f12.x1 /CLONE=IMAGE:2212943 /FEA=mRNA /CNT=80 /TID=Hs.121073.1 /TIER=Stack /STK=13 /UG=Hs.121073 /LL=55712 /UG\_GENE=FLJ10466 /UG\_TITLE=hypothetical protein FLJ10466\*2.769614313\*2.615217348\*EF-hand domain (C-terminal) containing 1\*EFHC1\*Hs.403171\*ENSG00000096093\*7517 // muscle development // inferred from electronic annotation\*16459 // myosin // inferred from electronic annotation\*3774 // motor activity // inferred from electronic annotation /// 5509 // calcium ion binding // inferred from electronic annotation  
219654\_at\*"gb:NM\_014241.1 /DB\_XREF=gi:7657481 /GEN=PTPLA /FEA=FLmRNA /CNT=23 /TID=Hs.114062.0 /TIER=FL+Stack /STK=8 /UG=Hs.114062 /LL=9200 /DEF=Homo sapiens protein tyrosine phosphatase-like (proline instead of catalytic arginine), member a (PTPLA), mRNA. /PROD=prot"\*2.769532171\*2.304493033\*"protein tyrosine phosphatase-like (proline instead of catalytic arginine), member a"\*PTPLA\*Hs.114062\*ENSG00000165996\*6470 // protein amino acid dephosphorylation // traceable author statement /// 7165 // signal transduction // non-traceable author statement /// 7275 // development // traceable author statement\*\*4725 // protein tyrosine phosphatase activity // traceable author statement  
1552489\_s\_at\*"gb:NM\_033066.1 /DB\_XREF=gi:14780901 /GEN=MPP4 /TID=Hs.2.63085.1 /CNT=16 /FEA=FLmRNA /TIER=FL /STK=3 /LL=58538 /UG=Hs.63085 /DEF=Homo sapiens membrane protein, palmitoylated 4 (MAGUK p55 subfamily member 4) (MPP4), mRNA. /PROD=membrane protein, palmitoylate"\*2.765603076\*2.61152846\*"membrane protein, palmitoylated 4 (MAGUK p55 subfamily member 4)"\*MPP4\*Hs.63085\*ENSG00000082126\*\*5515 // protein binding // inferred from electronic annotation  
210448\_s\_at\*"gb:U49396.1 /DB\_XREF=gi:1552523 /FEA=FLmRNA /CNT=8 /TID=Hs.77807.1 /TIER=FL /STK=0 /UG=Hs.77807 /LL=5026 /UG\_GENE=P2RX5 /DEF=Human ionotropic ATP receptor P2X5b mRNA, complete cds. /PROD=P2X5b /FL=gb:U49396.1 gb:AF070573.1"\*2.747102148\*2.323059214\*"purinergic receptor P2X, ligand-gated ion channel, 5"\*P2RX5\*Hs.408615\*ENSG00000083454\*6811 // ion transport // inferred from electronic annotation\*16020 // membrane // inferred from electronic annotation\*4872 // receptor activity // inferred from electronic annotation /// 5216 // ion channel activity // inferred from electronic annotation /// 5524 // ATP binding // inferred from electronic annotation  
202075\_s\_at\*"gb:NM\_006227.1 /DB\_XREF=gi:5453913 /GEN=PLTP /FEA=FLmRNA /CNT=330 /TID=Hs.283007.0 /TIER=FL+Stack /STK=135 /UG=Hs.283007 /LL=5360 /DEF=Homo sapiens phospholipid transfer protein (PLTP), mRNA. /PROD=phospholipid transfer protein /FL=gb:NM\_006227.1 gb:L2623"\*2.728055176\*2.708260441\*phospholipid transfer protein\*PLTP\*Hs.439312\*ENSG00000100979\*6629 // lipid metabolism // traceable author statement /// 6869 // lipid transport // inferred from electronic annotation\*5576 // extracellular region // traceable author statement\*8289 // lipid binding // inferred from electronic annotation  
229334\_at\*"gb:BF515942 /DB\_XREF=gi:11601121 /DB\_XREF=UI-H-BW1-aoa-f-07-0-UI.s1 /CLONE=IMAGE:3084061 /FEA=EST /CNT=15 /TID=Hs.35088.1 /TIER=Stack /STK=11

/UG=Hs.35088 /UG\_TITLE=ESTs•2.715674617•2.29486169•Similar to RUN and FYVE domain-containing 2; Run- and FYVE-domain containing protein••Hs.518801•••• 228882\_at•"gb:AL042088 /DB\_XREF=gi:5935428 /DB\_XREF=DKFZp434A1420\_s1 /CLONE=DKFZp434A1420 /FEA=mRNA /CNT=25 /TID=Hs.128751.0 /TIER=Stack /STK=11 /UG=Hs.128751 /UG\_TITLE=Homo sapiens cDNA FLJ12235 fis, clone MAMMA1001243"•2.709896911•4.576424897•tubby homolog (mouse)•TUB•Hs.231850•ENSG00000166402••5634 // nucleus // traceable author statement /// 5737 // cytoplasm // traceable author statement• 221729\_at•"gb:AL575735 /DB\_XREF=gi:12937190 /DB\_XREF=AL575735 /CLONE=CS0DI070YK23 (3 prime) /FEA=FLmRNA /CNT=405 /TID=Hs.82985.0 /TIER=Stack /STK=18 /UG=Hs.82985 /LL=1290 /UG\_GENE=COL5A2 /UG\_TITLE=collagen, type V, alpha 2 /FL=gb:NM\_000393.1"•2.65581525•3.405496426•"collagen, type V, alpha 2"•COL5A2•Hs.445827••6817 // phosphate transport // inferred from electronic annotation•5581 // collagen // inferred from electronic annotation /// 5588 // collagen type V // traceable author statement /// 5737 // cytoplasm // inferred from electronic annotation•5201 // extracellular matrix structural constituent // not recorded 214110\_s\_at•gb:BF195104 /DB\_XREF=gi:11081627 /DB\_XREF=7n15a07.x1 /CLONE=IMAGE:3564565 /FEA=EST /CNT=14 /TID=Hs.56729.2 /TIER=Stack /STK=12 /UG=Hs.56729 /LL=4046 /UG\_GENE=LSP1 /UG\_TITLE=lymphocyte-specific protein 1•2.649756264•3.264791981•Similar to lymphocyte-specific protein 1••Hs.546673•••• 225664\_at•"gb:AA788946 /DB\_XREF=gi:2849066 /DB\_XREF=ag40c06.s1 /CLONE=IMAGE:1119274 /FEA=EST /CNT=118 /TID=Hs.16869.0 /TIER=Stack /STK=91 /UG=Hs.16869 /UG\_TITLE=ESTs, Moderately similar to CALC RAT COLLAGEN ALPHA 1(XII) CHAIN (R.norvegicus)"•2.634888031•8.209536868•"collagen, type XII, alpha 1"•COL12A1•Hs.101302•ENSG00000111799•1501 // skeletal development // traceable author statement /// 6817 // phosphate transport // inferred from electronic annotation /// 7155 // cell adhesion // inferred from electronic annotation /// 30199 // collagen fibril organization // non-traceable a•5578 // extracellular matrix (sensu Metazoa) // inferred from electronic annotation /// 5595 // collagen type XII // non-traceable author statement /// 5595 // collagen type XII // traceable author statement /// 5737 // cytoplasm // inferred from electron•5198 // structural molecule activity // inferred from electronic annotation /// 5515 // protein binding // inferred from electronic annotation /// 30020 // extracellular matrix structural constituent conferring tensile strength // non-traceable author sta 207686\_s\_at•"gb:NM\_001228.1 /DB\_XREF=gi:4502582 /GEN=CASP8 /FEA=FLmRNA /CNT=3 /TID=Hs.19949.0 /TIER=FL /STK=0 /UG=Hs.19949 /LL=841 /DEF=Homo sapiens caspase 8, apoptosis-related cysteine protease (CASP8), mRNA. /PROD=caspase 8, apoptosis-related cysteine protease /FL="•2.633981682•3.489270188•"caspase 8, apoptosis-related cysteine protease"•CASP8•Hs.369736•ENSG00000064012•6508 // proteolysis and peptidolysis // traceable author statement /// 8632 // apoptotic program // traceable author statement /// 42981 // regulation of apoptosis // inferred from electronic annotation /// 43123 // positive regulation of I-kappaB kinase/•5739 // mitochondrion // traceable author statement /// 5856 // cytoskeleton // traceable author statement•4871 // signal transducer activity // inferred from expression pattern /// 5515 // protein binding // inferred from electronic annotation /// 8234 // cysteine-type peptidase activity // traceable author statement /// 30693 // caspase activity // traceable 214717\_at•gb:AL137534.1 /DB\_XREF=gi:6808209 /GEN=DKFZp434H1419 /FEA=mRNA /CNT=33 /TID=Hs.56876.0 /TIER=ConsEnd /STK=0 /UG=Hs.56876 /DEF=Homo sapiens mRNA; cDNA DKFZp434H1419 (from clone DKFZp434H1419); partial cds. /PROD=hypothetical protein•2.631700344•2.628901578•hypothetical protein DKFZp434H1419•DKFZp434H1419•Hs.56876•••• 228280\_at•gb:AI188445 /DB\_XREF=gi:3739654 /DB\_XREF=qd14b09.x1 /CLONE=IMAGE:1723673 /FEA=EST /CNT=20 /TID=Hs.152618.0 /TIER=Stack /STK=8 /UG=Hs.152618 /UG\_TITLE=ESTs•2.623947691•2.286094039•similar to RIKEN cDNA 1200014N16 gene•MGC14289•Hs.512833•ENSG00000146858••• 213201\_s\_at•"gb:AJ011712 /DB\_XREF=gi:4056561 /FEA=mRNA /CNT=448 /TID=Hs.73980.1 /TIER=Stack /STK=29 /UG=Hs.73980 /LL=7138 /UG\_GENE=TNNT1 /UG\_TITLE=troponin T1, skeletal, slow /DEF=Homo sapiens TNNT1 gene, exons 1-11 (and joined CDS)"•2.619298093•2.395028589•"troponin T1, skeletal, slow"•TNNT1•Hs.534085•ENSG00000105048•6937 // regulation of muscle contraction // traceable author statement /// 7517 // muscle development // inferred from electronic annotation••5523 // tropomyosin binding // traceable author statement 210220\_at•"gb:L37882.1 /DB\_XREF=gi:736678 /GEN=frizzled /FEA=FLmRNA /CNT=18 /TID=Hs.81217.0 /TIER=FL /STK=6 /UG=Hs.81217 /LL=2535 /UG\_TITLE=frizzled (Drosophila) homolog 2 /DEF=Human frizzled gene product mRNA, complete cds. /FL=gb:NM\_001466.2 gb:AB017364.1 gb:L3788"•2.604269513•2.37928671•frizzled homolog 2 (Drosophila)•FZD2•Hs.142912•ENSG00000180340•7164 // establishment of tissue polarity // traceable author statement /// 7186 // G-protein coupled receptor protein signaling pathway // inferred from electronic annotation /// 7275 // development // inferred from electronic annotation /// 16055 // Wnt •5887 // integral to plasma membrane // traceable author statement /// 16020 // membrane // inferred from electronic annotation•4926 // non-G-protein coupled 7TM receptor activity // inferred from electronic annotation /// 4930 // G-protein coupled receptor activity // inferred from electronic annotation

227726\_at\*"gb:BF057084 /DB\_XREF=gi:10810980 /DB\_XREF=7k15f02.x1  
/CLONE=IMAGE:3444602 /FEA=EST /CNT=25 /TID=Hs.105280.0 /TIER=Stack /STK=8  
/UG=Hs.105280 /UG\_TITLE=ESTs, Weakly similar to dJ963K23.2  
(H.sapiens)"\*2.591620334\*2.556374732\*ring finger protein  
166\*RNFL166\*Hs.513804\*ENSG00000158717\*16567 // protein ubiquitination //  
inferred from electronic annotation\*151 // ubiquitin ligase complex //  
inferred from electronic annotation /// 5634 // nucleus // inferred from  
electronic annotation\*3676 // nucleic acid binding // inferred from  
electronic annotation /// 4842 // ubiquitin-protein ligase activity //  
inferred from electronic annotation /// 8270 // zinc ion binding // inferred  
from electronic annotation  
205123\_s\_at\*"gb:NM\_003692.1 /DB\_XREF=gi:4507548 /GEN=TMEFF1 /FEA=FLmRNA  
/CNT=65 /TID=Hs.78531.0 /TIER=FL /STK=0 /UG=Hs.78531 /LL=8577 /DEF=Homo  
sapiens transmembrane protein with EGF-like and two follistatin-like domains  
1 (TMEFF1), mRNA. /PROD=transmembrane protein  
w"\*2.583638039\*2.151563274\*transmembrane protein with EGF-like and two  
follistatin-like domains 1\*TMEFF1\*Hs.336224\*ENSG00000066697\*\*16021 //  
integral to membrane // inferred from electronic annotation\*  
222258\_s\_at\*"gb:AF015043.1 /DB\_XREF=gi:4102710 /FEA=mRNA /CNT=1  
/TID=Hs.17667.1 /TIER=ConsEnd /STK=1 /UG=Hs.17667 /LL=23677 /UG\_GENE=SH3BP4  
/DEF=Homo sapiens EH-binding protein mRNA, partial cds. /PROD=EH-binding  
protein"\*2.574159877\*3.844837956\*SH3-domain binding protein  
4\*SH3BP4\*Hs.516777\*ENSG00000130147\*6897 // endocytosis // traceable author  
statement /// 7049 // cell cycle // traceable author statement\*5634 //  
nucleus // traceable author statement\*4871 // signal transducer activity //  
traceable author statement  
236453\_at\*"gb:AW243154 /DB\_XREF=gi:6576958 /DB\_XREF=xn29c01.x1  
/CLONE=IMAGE:2695104 /FEA=EST /CNT=5 /TID=Hs.121276.0 /TIER=ConsEnd /STK=5  
/UG=Hs.121276 /UG\_TITLE=ESTs\*2.569718714\*2.209242242\*similar to 60S ribosomal  
protein L7a (Surfeit locus protein 3) (PLA-X  
polypeptide)\*LOC441422\*Hs.99081\*\*\*\*  
213610\_s\_at\*"gb:BE326381 /DB\_XREF=gi:9200157 /DB\_XREF=hw02e08.x1  
/CLONE=IMAGE:3181766 /FEA=EST /CNT=30 /TID=Hs.18724.0 /TIER=Stack /STK=10  
/UG=Hs.18724 /UG\_TITLE=Homo sapiens mRNA; cDNA DKFZp564F093 (from clone  
DKFZp564F093)\*2.567573224\*2.469808801\*hypothetical protein  
MGC2610\*MGC2610\*Hs.470549\*ENSG00000144362\*\*5515 // protein binding //  
inferred from electronic annotation  
226876\_at\*"gb:AI961778 /DB\_XREF=gi:5754491 /DB\_XREF=wt67d10.x1  
/CLONE=IMAGE:2512531 /FEA=EST /CNT=36 /TID=Hs.124707.0 /TIER=Stack /STK=10  
/UG=Hs.124707 /UG\_TITLE=ESTs\*2.563760898\*3.249418478\*hypothetical protein  
MGC45871\*MGC45871\*Hs.345588\*ENSG00000183688\*\*\*\*  
232667\_at\*"gb:AK023752.1 /DB\_XREF=gi:10435780 /FEA=mRNA /CNT=5  
/TID=Hs.306657.0 /TIER=ConsEnd /STK=0 /UG=Hs.306657 /UG\_TITLE=Homo sapiens  
cDNA FLJ13690 fis, clone PLACE2000097 /DEF=Homo sapiens cDNA FLJ13690 fis,  
clone PLACE2000097."\*2.554002057\*3.339829937\*"CDNA FLJ13690 fis, clone  
PLACE2000097"\*Hs.435835\*\*\*\*  
203910\_at\*"gb:NM\_004815.1 /DB\_XREF=gi:4758881 /GEN=PARG1 /FEA=FLmRNA /CNT=91  
/TID=Hs.70983.0 /TIER=FL+Stack /STK=17 /UG=Hs.70983 /LL=9411 /DEF=Homo  
sapiens PTPL1-associated RhoGAP 1 (PARG1), mRNA. /PROD=PTPL1-associated  
RhoGAP 1 /FL=gb:U90920.1  
gb:NM\_004815.1"\*2.547167006\*4.29723847\*PTPL1-associated RhoGAP  
1\*PARG1\*Hs.483238\*ENSG00000137962\*7242 // intracellular signaling cascade //  
inferred from electronic annotation /// 7266 // Rho protein signal  
transduction // traceable author statement\*\*5100 // Rho GTPase activator  
activity // traceable author statement /// 1992 // diacylglycerol binding //  
inferred from electronic annotation  
1554667\_s\_at\*"gb:BC025250.1 /DB\_XREF=gi:19264122 /TID=Hs2.135146.2 /CNT=5  
/FEA=FLmRNA /TIER=FL /STK=1 /LL=79828 /UG\_GENE=FLJ13984 /UG=Hs.135146  
/UG\_TITLE=hypothetical protein FLJ13984 /DEF=Homo sapiens, hypothetical  
protein FLJ13984, clone MGC:39122 IMAGE:5433692,  
mRNA"\*2.540769053\*3.364315985\*hypothetical protein  
FLJ13984\*FLJ13984\*Hs.135146\*ENSG00000123600\*\*\*\*  
206170\_at\*"gb:NM\_000024.2 /DB\_XREF=gi:13162366 /GEN=ADRB2 /FEA=FLmRNA /CNT=35  
/TID=Hs.2551.0 /TIER=FL /STK=0 /UG=Hs.2551 /LL=154 /DEF=Homo sapiens  
adrenergic, beta-2-, receptor, surface (ADRB2), mRNA. /PROD=adrenergic,  
beta-2-, receptor, surface /FL=gb:NM\_000024.2  
g"\*2.526389418\*5.277317656\*"adrenergic, beta-2-, receptor,  
surface"\*ADRB2\*Hs.2551\*ENSG00000169252\*187 // activation of MAPK // traceable  
author statement /// 6898 // receptor mediated endocytosis // traceable  
author statement /// 7171 // transmembrane receptor protein tyrosine kinase  
activation (dimerization) // traceable author statement /// 7186 // \*5764 //  
lysosome // traceable author statement /// 5768 // endosome // traceable  
author statement /// 5886 // plasma membrane // traceable author statement  
/// 5887 // integral to plasma membrane // traceable author statement\*1584 //  
rhodopsin-like receptor activity // inferred from electronic annotation ///  
4872 // receptor activity // inferred from electronic annotation /// 4941 //  
beta2-adrenergic receptor activity // traceable author statement  
205659\_at\*"gb:NM\_014707.1 /DB\_XREF=gi:7662279 /GEN=HDAC7B-PENDING /FEA=FLmRNA  
/CNT=32 /TID=Hs.116753.0 /TIER=FL /STK=6 /UG=Hs.116753 /LL=9734 /DEF=Homo  
sapiens histone deacetylase 7B (HDAC7B-PENDING), mRNA. /PROD=histone  
deacetylase 7B /FL=gb:AB018287.1

gb:NM\_014707"•2.517783004•3.355270376•histone deacetylase  
9•HDAC9•Hs.196054•ENSG00000048052•"74 // regulation of cell cycle //  
traceable author statement /// 6350 // transcription // inferred from  
electronic annotation /// 6355 // regulation of transcription, DNA-dependent  
// inferred from electronic annotation /// 6954 // inflammatory response  
/"•118 // histone deacetylase complex // traceable author statement /// 5634  
// nucleus // inferred from electronic annotation /// 5634 // nucleus //  
non-traceable author statement /// 5737 // cytoplasm // traceable author  
statement•4407 // histone deacetylase activity // non-traceable author  
statement /// 8134 // transcription factor binding // traceable author  
statement /// 16566 // specific transcriptional repressor activity //  
traceable author statement /// 16787 // hydrolase act  
203702\_s\_at•gb:AL043927 /DB\_XREF=gi:5935917 /DB\_XREF=DKFZp434F1028\_s1  
/CLONE=DKFZp434F1028 /FEA=FLmRNA /CNT=93 /TID=Hs.169910.0 /TIER=Stack /STK=31  
/UG=Hs.169910 /LL=9654 /UG\_GENE=KIAA0173 /UG\_TITLE=KIAA0173 gene product  
/FL=gb:NM\_014640.1 gb:D79995.1•2.51326902•2.87824903•"tubulin tyrosine  
ligase-like family, member 4"•TTLL4•Hs.471405•ENSG00000135912•6464 // protein  
modification // inferred from electronic annotation••4835 // tubulin-tyrosine  
ligase activity // inferred from electronic annotation /// 16874 // ligase  
activity // inferred from electronic annotation  
228987\_at•gb:AA156238 /DB\_XREF=gi:1727856 /DB\_XREF=zl50c10.s1  
/CLONE=IMAGE:505362 /FEA=EST /CNT=23 /TID=Hs.32501.0 /TIER=Stack /STK=15  
/UG=Hs.32501 /UG\_TITLE=ESTs•2.454515722•2.7034823•"Family with sequence  
similarity 49, member B"•FAM49B•Hs.492869•ENSG00000153310•••  
215767\_at•gb:AF052145.1 /DB\_XREF=gi:3360454 /FEA=mRNA /CNT=4 /TID=Hs.159528.0  
/TIER=ConsEnd /STK=0 /UG=Hs.159528 /UG\_TITLE=Homo sapiens clone 24400 mRNA  
sequence /DEF=Homo sapiens clone 24400 mRNA  
sequence. •2.446333193•4.238097657•chromosome 2 open reading frame  
10•C2orf10•Hs.159528•ENSG00000170396••5634 // nucleus // inferred from  
electronic annotation•3676 // nucleic acid binding // inferred from  
electronic annotation /// 8270 // zinc ion binding // inferred from  
electronic annotation  
208025\_s\_at•"gb:NM\_003483.2 /DB\_XREF=gi:6631086 /GEN=HMGIC /FEA=FLmRNA /CNT=1  
/TID=HsAffx.900004.136 /TIER=FL /STK=0 /DEF=Homo sapiens high-mobility group  
(nonhistone chromosomal) protein isoform I-C (HMGIC), mRNA.  
/PROD=high-mobility group (nonhistone  
chromosomal)pro"•2.445292313•3.291838163•high mobility group AT-hook 2 ///  
high mobility group AT-hook 2•HMG2•Hs.505924••6325 // establishment and/or  
maintenance of chromatin architecture // traceable author statement /// 6350  
// transcription // inferred from electronic annotation /// 6355 //  
regulation of transcription, DNA-dependent // traceable author statement ///  
7275"•785 // chromatin // inferred from electronic annotation /// 5634 //  
nucleus // inferred from electronic annotation•3680 // AT DNA binding //  
traceable author statement  
224932\_at•"gb:AI814909 /DB\_XREF=gi:5426124 /DB\_XREF=wk68e04.x1  
/CLONE=IMAGE:2420574 /FEA=EST /CNT=174 /TID=Hs.66915.0 /TIER=Stack /STK=113  
/UG=Hs.66915 /UG\_TITLE=ESTs, Weakly similar to 16.7Kd protein  
(H.sapiens)"•2.431785465•2.053811276•chromosome 22 open reading frame  
16•C22orf16•Hs.66915•ENSG00000138869•••  
219622\_at•"gb:NM\_017817.1 /DB\_XREF=gi:8923400 /GEN=FLJ20429 /FEA=FLmRNA  
/CNT=29 /TID=Hs.179791.0 /TIER=FL /STK=0 /UG=Hs.179791 /LL=55647 /DEF=Homo  
sapiens hypothetical protein FLJ20429 (FLJ20429), mRNA. /PROD=hypothetical  
protein FLJ20429 /FL=gb:NM\_017817.1"•2.429696434•2.379064084•"RAB20, member  
RAS oncogene family"•RAB20•Hs.508720•ENSG00000139832•7264 // small GTPase  
mediated signal transduction // inferred from electronic annotation /// 15031  
// protein transport // inferred from electronic annotation••5525 // GTP  
binding // inferred from electronic annotation  
203286\_at•"gb:NM\_014901.1 /DB\_XREF=gi:7662485 /GEN=KIAA1100 /FEA=FLmRNA  
/CNT=120 /TID=Hs.179946.0 /TIER=FL+Stack /STK=53 /UG=Hs.179946 /LL=22838  
/DEF=Homo sapiens KIAA1100 protein (KIAA1100), mRNA. /PROD=KIAA1100 protein  
/FL=gb:AB029023.1 gb:NM\_014901.1"•2.423933754•2.408633846•ring finger protein  
44•RNF44•Hs.434888•ENSG00000146083•16567 // protein ubiquitination //  
inferred from electronic annotation•151 // ubiquitin ligase complex //  
inferred from electronic annotation•4842 // ubiquitin-protein ligase activity  
// inferred from electronic annotation /// 8270 // zinc ion binding //  
inferred from electronic annotation  
242300\_at•gb:BF432276 /DB\_XREF=gi:11444390 /DB\_XREF=nab88e12.x1  
/CLONE=IMAGE:3274870 /FEA=EST /CNT=4 /TID=Hs.104580.0 /TIER=ConsEnd /STK=3  
/UG=Hs.104580 /UG\_TITLE=ESTs•2.420334303•2.220955051••••••••••  
243367\_at•gb:AI018561 /DB\_XREF=gi:3233080 /DB\_XREF=ou30g09.x1  
/CLONE=IMAGE:1627840 /FEA=EST /CNT=3 /TID=Hs.122156.0 /TIER=ConsEnd /STK=3  
/UG=Hs.122156 /UG\_TITLE=ESTs•2.39988025•3.015378058•Similar to D(1B) dopamine  
receptor (D(5) dopamine receptor) (D1beta dopamine receptor)••Hs.456465••7186  
// G-protein coupled receptor protein signaling pathway // inferred from  
electronic annotation•16021 // integral to membrane // inferred from  
electronic annotation•1584 // rhodopsin-like receptor activity // inferred  
from electronic annotation /// 4872 // receptor activity // inferred from  
electronic annotation /// 4952 // dopamine receptor activity // inferred from  
electronic annotation  
212365\_at•"gb:BF215996 /DB\_XREF=gi:11109582 /DB\_XREF=601881549F1  
/CLONE=IMAGE:4093740 /FEA=mRNA /CNT=213 /TID=Hs.121576.0 /TIER=Stack /STK=19



/UG=Hs.121576 /UG\_TITLE=Homo sapiens cDNA FLJ20153 fis, clone COL08656, highly similar to AJ001381 Homo sapiens incomplete  
c"•2.388798857•3.451925589•myosin IB•MYO1B•Hs.439620•ENSG00000128641••16459  
// myosin // inferred from electronic annotation•3774 // motor activity // inferred from electronic annotation /// 3779 // actin binding // inferred from electronic annotation /// 5516 // calmodulin binding // inferred from electronic annotation /// 5524 // ATP binding // inferred from electronic annota  
200884\_at•"gb:NM\_001823.1 /DB\_XREF=gi:4502850 /GEN=CKB /FEA=FLmRNA /CNT=452 /TID=Hs.173724.0 /TIER=FL+Stack /STK=171 /UG=Hs.173724 /LL=1152 /DEF=Homo sapiens creatine kinase, brain (CKB), mRNA. /PROD=creatine kinase, brain /FL=gb:L47647.1 gb:BC004914.1  
gb:NM\_001823."•2.383458051•2.248337883•"creatine kinase, brain"•CKB•Hs.173724•ENSG00000166165••5737 // cytoplasm // not recorded•4111 // creatine kinase activity // traceable author statement  
226136\_at•gb:N32834 /DB\_XREF=gi:1153233 /DB\_XREF=yw85h01.s1 /CLONE=IMAGE:259057 /FEA=EST /CNT=61 /TID=Hs.154762.2 /TIER=Stack /STK=16 /UG=Hs.154762 /LL=11103 /UG\_GENE=HRB2 /UG\_TITLE=HIV-1 rev binding protein 2•2.383362814•5.38889447••••••••••  
202806\_at•"gb:NM\_004395.1 /DB\_XREF=gi:4758123 /GEN=DNB1 /FEA=FLmRNA /CNT=134 /TID=Hs.89434.0 /TIER=FL+Stack /STK=22 /UG=Hs.89434 /LL=1627 /DEF=Homo sapiens drebrin 1 (DNB1), mRNA. /PROD=drebrin 1 /FL=gb:D17530.1 gb:BC000283.1 gb:U00802.1 gb:NM\_004395.1"•2.379011511•2.241481847•drebrin 1•DNB1•Hs.130316•ENSG00000113758•7015 // actin filament organization // inferred from sequence or structural similarity /// 7399 // neurogenesis // inferred from electronic annotation /// 30154 // cell differentiation // inferred from electronic annotation /// 48168 // regulation of neur•5622 // intracellular // inferred from electronic annotation /// 5737 // cytoplasm // non-traceable author statement /// 15629 // actin cytoskeleton // inferred from sequence or structural similarity /// 30425 // dendrite // non-traceable author statement•3779 // actin binding // inferred from electronic annotation /// 3779 // actin binding // non-traceable author statement /// 5522 // profilin binding // inferred from sequence or structural similarity  
225806\_at•"gb:AI289311 /DB\_XREF=gi:3932575 /DB\_XREF=qw28a05.x1 /CLONE=IMAGE:1992368 /FEA=mRNA /CNT=66 /TID=Hs.64552.0 /TIER=Stack /STK=13 /UG=Hs.64552 /UG\_TITLE=Homo sapiens cDNA: FLJ21914 fis, clone HEP03892"•2.378127673•3.612201131•"jub, ajuba homolog (Xenopus laevis)"•JUB•Hs.508910•ENSG00000129474•••8270 // zinc ion binding // inferred from electronic annotation  
232231\_at•gb:AL353944.1 /DB\_XREF=gi:7669984 /FEA=mRNA /CNT=13 /TID=Hs.50115.0 /TIER=ConsEnd /STK=7 /UG=Hs.50115 /UG\_TITLE=Homo sapiens mRNA; cDNA DKFZp761J1112 (from clone DKFZp761J1112) /DEF=Homo sapiens mRNA; cDNA DKFZp761J1112 (from clone DKFZp761J1112).•2.372693021•2.332245255•Runt-related transcription factor 2•RUNX2•Hs.122116•ENSG00000124813•"1503 // ossification // traceable author statement /// 6350 // transcription // inferred from electronic annotation /// 6355 // regulation of transcription, DNA-dependent // inferred from electronic annotation"•5634 // nucleus // inferred from electronic annotation•3700 // transcription factor activity // non-traceable author statement /// 3702 // RNA polymerase II transcription factor activity // traceable author statement /// 5515 // protein binding // inferred from physical interaction /// 5524 // ATP binding //  
227377\_at•"gb:AK022784.1 /DB\_XREF=gi:10434388 /FEA=mRNA /CNT=51 /TID=Hs.24739.0 /TIER=Stack /STK=24 /UG=Hs.24739 /UG\_TITLE=Homo sapiens cDNA FLJ12555 fis, clone NT2RM4000764 /DEF=Homo sapiens cDNA FLJ12722 fis, clone NT2RP1001311."•2.370966449•4.006236137••••••••••  
206343\_s\_at•"gb:NM\_013959.1 /DB\_XREF=gi:7669517 /GEN=NRG1 /FEA=FLmRNA /CNT=25 /TID=Hs.172816.2 /TIER=FL+Stack /STK=12 /UG=Hs.172816 /LL=3084 /DEF=Homo sapiens neuregulin 1 (NRG1), transcript variant SMDF, mRNA. /PROD=neuregulin 1 isoform SMDF /FL=gb:L41827.1 gb:NM\_013"•2.365782906•2.305997181•neuregulin 1•NRG1•Hs.453951•ENSG00000157168•7399 // neurogenesis // non-traceable author statement /// 9790 // embryonic development // inferred from electronic annotation /// 30154 // cell differentiation // non-traceable author statement•5576 // extracellular region // non-traceable author statement /// 16020 // membrane // non-traceable author statement /// 16021 // integral to membrane // inferred from electronic annotation•5102 // receptor binding // inferred from electronic annotation /// 8083 // growth factor activity // inferred from electronic annotation /// 8083 // growth factor activity // non-traceable author statement /// 30297 // transmembrane receptor protein tyro  
231192\_at•gb:AW274018 /DB\_XREF=gi:6661048 /DB\_XREF=xv26d05.x1 /CLONE=IMAGE:2814249 /FEA=EST /CNT=8 /TID=Hs.99083.0 /TIER=Stack /STK=8 /UG=Hs.99083 /UG\_TITLE=ESTs•2.364837633•2.195193938•"Endothelial differentiation, lysophosphatidic acid G-protein-coupled receptor, 7"•EDG7•Hs.527909•ENSG00000171517•"7165 // signal transduction // inferred from electronic annotation /// 7187 // G-protein signaling, coupled to cyclic nucleotide second messenger // traceable author statement /// 7204 // positive regulation of cytosolic calcium ion concentration // trace"•5886 // plasma membrane // traceable author statement /// 5887 // integral to plasma membrane // traceable author statement•1619 // lysosphingolipid and lysophosphatidic acid receptor activity // inferred from electronic

annotation /// 4872 // receptor activity // inferred from electronic  
annotation /// 8289 // lipid binding // traceable author statement  
227986\_at\*gb:AW014719 /DB\_XREF=gi:5863476 /DB\_XREF=UI-H-BI0-aae-a-10-0-UI.s1  
/CLONE=IMAGE:2709018 /FEA=EST /CNT=23 /TID=Hs.59317.0 /TIER=Stack /STK=16  
/UG=Hs.59317 /UG\_TITLE=ESTs\*2.342273181\*2.471815444\*zinc finger protein  
343\*ZNF343\*Hs.516846\*ENSG00000088876\*6355 // regulation of transcription,  
DNA-dependent // inferred from electronic annotation\*5634 // nucleus //  
inferred from electronic annotation\*3676 // nucleic acid binding // inferred  
from electronic annotation /// 3677 // DNA binding // inferred from  
electronic annotation /// 8270 // zinc ion binding // inferred from  
electronic annotation  
212816\_s\_at\*gb:BE613178 /DB\_XREF=gi:9894775 /DB\_XREF=601452166T1  
/CLONE=IMAGE:3855712 /FEA=mRNA /CNT=102 /TID=Hs.84152.2 /TIER=Stack /STK=9  
/UG=Hs.84152 /LL=875 /UG\_GENE=CBS  
/UG\_TITLE=cystathionine-beta-synthase\*2.327552592\*2.910850454\*cystathionine-be  
ta-synthase\*CBS\*Hs.533013\*ENSG00000160200\*6535 // cysteine biosynthesis from  
serine // inferred from electronic annotation /// 8152 // metabolism //  
inferred from electronic annotation /// 8652 // amino acid biosynthesis //  
inferred from electronic annotation /// 19343 // cysteine biosynthesis  
vi\*5737 // cytoplasm // inferred from electronic annotation\*4122 //  
cystathionine beta-synthase activity // traceable author statement /// 16829  
// lyase activity // inferred from electronic annotation  
244359\_s\_at\*gb:H28915 /DB\_XREF=gi:899825 /DB\_XREF=yms33b09.s1  
/CLONE=IMAGE:49766 /FEA=EST /CNT=3 /TID=Hs.117689.0 /TIER=ConsEnd /STK=3  
/UG=Hs.117689 /UG\_TITLE=ESTs\*2.324033912\*2.928502274\*.....  
206290\_s\_at\*"gb:NM\_002924.1 /DB\_XREF=gi:11140808 /GEN=RGS7 /FEA=FLmRNA  
/CNT=26 /TID=Hs.79348.0 /TIER=FL /STK=4 /UG=Hs.79348 /LL=6000 /DEF=Homo  
sapiens regulator of G-protein signalling 7 (RGS7), mRNA. /PROD=regulator of  
G-protein signalling 7 /FL=gb:AF090116.1  
gb:NM\_0\*2.323900791\*4.237641817\*regulator of G-protein signalling  
7\*RGS7\*Hs.130171\*ENSG00000182901\*7242 // intracellular signaling cascade //  
inferred from electronic annotation /// 8277 // regulation of G-protein  
coupled receptor protein signaling pathway // non-traceable author  
statement\*5834 // heterotrimeric G-protein complex // inferred from  
electronic annotation\*4871 // signal transducer activity // inferred from  
electronic annotation /// 16299 // regulator of G-protein signaling activity  
// non-traceable author statement  
242346\_x\_at\*gb:BF222929 /DB\_XREF=gi:11130106 /DB\_XREF=7q25b10.x1  
/CLONE=IMAGE:3699402 /FEA=EST /CNT=3 /TID=Hs.290585.0 /TIER=ConsEnd /STK=3  
/UG=Hs.290585 /UG\_TITLE=ESTs\*2.302882486\*3.257919735\*.....  
210387\_at\*"gb:BC001131.1 /DB\_XREF=gi:12654590 /FEA=FLmRNA /CNT=22  
/TID=Hs.247817.1 /TIER=FL /STK=0 /UG=Hs.247817 /LL=8339 /UG\_GENE=H2BFA  
/DEF=Homo sapiens, H2B histone family, member A, clone MGC:2561, mRNA,  
complete cds. /PROD=H2B histone family, member A  
/FL=gb:NM\*2.301642011\*2.756495359\*"histone 1,  
H2bg"\*HIST1H2BG\*Hs.182137\*ENSG00000180596 /// ENSG00000197697 ///  
ENSG00000197846 /// ENSG00000187990 /// ENSG00000168242\*...  
201288\_at\*"gb:NM\_001175.1 /DB\_XREF=gi:10835001 /GEN=ARHGDI1B /FEA=FLmRNA  
/CNT=466 /TID=Hs.83656.0 /TIER=FL+Stack /STK=151 /UG=Hs.83656 /LL=397  
/DEF=Homo sapiens Rho GDP dissociation inhibitor (GDI) beta (ARHGDI1B), mRNA.  
/PROD=Rho GDP dissociation inhibitor (GDI) beta\*2.297366627\*2.293440087\*Rho  
GDP dissociation inhibitor (GDI) beta\*ARHGDI1B\*Hs.504877\*ENSG00000111348\*6955  
// immune response // traceable author statement /// 7162 // negative  
regulation of cell adhesion // traceable author statement /// 7266 // Rho  
protein signal transduction // traceable author statement /// 7275 //  
development // traceable author stat\*16023 // cytoplasmic vesicle //  
traceable author statement\*5094 // Rho GDP-dissociation inhibitor activity //  
traceable author statement /// 5096 // GTPase activator activity // inferred  
from electronic annotation  
1553972\_a\_at\*"gb:BC007257.1 /DB\_XREF=gi:13938262 /TID=Hs2.84152.2 /CNT=70  
/FEA=FLmRNA /TIER=FL+Stack /STK=33 /LL=875 /UG\_GENE=CBS /UG=Hs.84152  
/DEF=Homo sapiens, cystathionine-beta-synthase, clone MGC:15515  
IMAGE:3028099, mRNA, complete cds.  
/PROD=cystathionine-beta-sy\*2.290334394\*3.733051597\*cystathionine-beta-syntha  
se\*CBS\*Hs.533013\*ENSG00000160200\*6535 // cysteine biosynthesis from serine //  
inferred from electronic annotation /// 8152 // metabolism // inferred from  
electronic annotation /// 8652 // amino acid biosynthesis // inferred from  
electronic annotation /// 19343 // cysteine biosynthesis vi\*5737 // cytoplasm  
// inferred from electronic annotation\*4122 // cystathionine beta-synthase  
activity // traceable author statement /// 16829 // lyase activity //  
inferred from electronic annotation  
230425\_at\*gb:AI674183 /DB\_XREF=gi:4874663 /DB\_XREF=wc09c07.x1  
/CLONE=IMAGE:2314668 /FEA=EST /CNT=14 /TID=Hs.78436.4 /TIER=Stack /STK=14  
/UG=Hs.78436 /LL=2047 /UG\_GENE=EPHB1  
/UG\_TITLE=EphB1\*2.288704607\*3.45822466\*EPH receptor  
B1\*EPHB1\*Hs.116092\*ENSG00000154928\*6468 // protein amino acid phosphorylation  
// inferred from electronic annotation /// 7165 // signal transduction //  
traceable author statement /// 7169 // transmembrane receptor protein  
tyrosine kinase signaling pathway // inferred from electronic annota\*5886 //  
plasma membrane // traceable author statement /// 5887 // integral to plasma  
membrane // traceable author statement\*4872 // receptor activity // inferred

from electronic annotation /// 5003 // ephrin receptor activity // inferred from electronic annotation /// 5524 // ATP binding // inferred from electronic annotation /// 16740 // transferase activity // inferred from 230508\_at\*gb:AL569601 /DB\_XREF=gi:12925101 /DB\_XREF=AL569601 /CLONE=CS0DE011YL13 (3 prime) /FEA=EST /CNT=14 /TID=Hs.85591.0 /TIER=Stack /STK=10 /UG=Hs.85591 /UG\_TITLE=ESTs\*2.283448847\*2.848495884\*Dickkopf homolog 3 (Xenopus laevis)\*DKK3\*Hs.292156\*ENSG00000050165\*6118 // electron transport // inferred from electronic annotation /// 7275 // development // inferred from electronic annotation /// 9653 // morphogenesis // traceable author statement /// 16055 // Wnt receptor signaling pathway // inferred from electroni\*5576 // extracellular region // inferred from electronic annotation /// 5615 // extracellular space // traceable author statement /// 16020 // membrane // inferred from electronic annotation /// 45285 // ubiquinol-cytochrome-c reductase complex // inferre\*8121 // ubiquinol-cytochrome-c reductase activity // inferred from electronic annotation 213677\_s\_at\*gb:BG434893 /DB\_XREF=gi:13341399 /DB\_XREF=602507842F1 /CLONE=IMAGE:4604891 /FEA=EST /CNT=30 /TID=Hs.111749.1 /TIER=Stack /STK=19 /UG=Hs.111749 /LL=5378 /UG\_GENE=PMS1 /UG\_TITLE=postmeiotic segregation increased (S. cerevisiae) 1\*2.283303648\*2.571175387\*PMS1 postmeiotic segregation increased 1 (S. cerevisiae)\*PMS1\*Hs.111749\*ENSG00000064933\*"6298 // mismatch repair // traceable author statement /// 6355 // regulation of transcription, DNA-dependent // inferred from electronic annotation /// 7049 // cell cycle // inferred from electronic annotation /// 45786 // negative regulation of cell cycl"\*5634 // nucleus // inferred from electronic annotation /// 5634 // nucleus // traceable author statement /// 19866 // inner membrane // inferred from electronic annotation\*3677 // DNA binding // traceable author statement /// 5524 // ATP binding // inferred from electronic annotation 202976\_s\_at\*"gb:NM\_014899.1 /DB\_XREF=gi:7662355 /GEN=KIAA0878 /FEA=FLmRNA /CNT=168 /TID=Hs.188006.0 /TIER=FL+Stack /STK=10 /UG=Hs.188006 /LL=22836 /DEF=Homo sapiens KIAA0878 protein (KIAA0878), mRNA. /PROD=KIAA0878 protein /FL=gb:NM\_014899.1 gb:AB020685.1"\*2.276868745\*2.445252723\*Rho-related BTB domain containing 3\*RHOBTB3\*Hs.445030\*ENSG00000164292\*3924 // GTPase activity // non-traceable author statement /// 5515 // protein binding // inferred from electronic annotation 243366\_s\_at\*gb:AI936034 /DB\_XREF=gi:5674904 /DB\_XREF=wo47c10.x1 /CLONE=IMAGE:2458482 /FEA=EST /CNT=3 /TID=Hs.43936.0 /TIER=ConsEnd /STK=3 /UG=Hs.43936 /UG\_TITLE=ESTs\*2.26983377\*3.208883825\*Transcribed locus\*Hs.541511\*3924 202936\_s\_at\*"gb:NM\_000346.1 /DB\_XREF=gi:4557852 /GEN=SOX9 /FEA=FLmRNA /CNT=136 /TID=Hs.2316.0 /TIER=FL+Stack /STK=39 /UG=Hs.2316 /LL=6662 /DEF=Homo sapiens SRY (sex determining region Y)-box 9 (campomelic dysplasia, autosomal sex-reversal) (SOX9), mRNA. /PROD=transcri"\*2.268398917\*12.33668725\*"SRY (sex determining region Y)-box 9 (campomelic dysplasia, autosomal sex-reversal)"\*SOX9\*Hs.2316\*ENSG00000125398\*1501 // skeletal development // not recorded /// 1502 // cartilage condensation // not recorded /// 6350 // transcription // inferred from electronic annotation /// 6357 // regulation of transcription from RNA polymerase II promoter // traceable author st\*5634 // nucleus // traceable author statement\*3677 // DNA binding // inferred from electronic annotation /// 3704 // specific RNA polymerase II transcription factor activity // traceable author statement 201952\_at\*gb:AA156721 /DB\_XREF=gi:1728335 /DB\_XREF=z118b04.s1 /CLONE=IMAGE:502255 /FEA=FLmRNA /CNT=267 /TID=Hs.10247.0 /TIER=Stack /STK=87 /UG=Hs.10247 /LL=214 /UG\_GENE=ALCAM /UG\_TITLE=activated leucocyte cell adhesion molecule /FL=gb:NM\_001627.1 gb:L38608.1\*2.263320532\*2.665619982\*3924 225525\_at\*"gb:AB051458.1 /DB\_XREF=gi:13359214 /GEN=KIAA1671 /FEA=mRNA /CNT=72 /TID=Hs.7890.0 /TIER=Stack /STK=32 /UG=Hs.7890 /DEF=Homo sapiens mRNA for KIAA1671 protein, partial cds. /PROD=KIAA1671 protein\*2.257437115\*4.541134999\*KIAA1671 protein\*KIAA1671\*Hs.419171\*3924 228188\_at\*"gb:AI860150 /DB\_XREF=gi:5513766 /DB\_XREF=wh39g07.x1 /CLONE=IMAGE:2383164 /FEA=EST /CNT=24 /TID=Hs.5890.0 /TIER=Stack /STK=13 /UG=Hs.5890 /UG\_TITLE=ESTs, Weakly similar to A49134 Ig kappa chain V-I region (H.sapiens)"\*2.252535997\*2.037948208\*FOS-like antigen 2\*FOSL2\*Hs.220971\*ENSG00000075426\*6357 // regulation of transcription from RNA polymerase II promoter // traceable author statement /// 8219 // cell death // traceable author statement\*5634 // nucleus // traceable author statement\*3700 // transcription factor activity // traceable author statement 1560099\_at\*"gb:BC041488.1 /DB\_XREF=gi:27371106 /TID=Hs2.210654.1 /CNT=4 /FEA=mRNA /TIER=ConsEnd /STK=0 /UG=Hs.210654 /UG\_TITLE=Homo sapiens cDNA FLJ32911 fis, clone TESTI2006210. /DEF=Homo sapiens, clone IMAGE:5494257, mRNA."\*2.238788875\*3.030885219\*Hypothetical gene supported by BC072410\*Hs.441073\*3924 219002\_at\*"gb:NM\_024622.1 /DB\_XREF=gi:13375843 /GEN=FLJ21901 /FEA=FLmRNA /CNT=45 /TID=Hs.32646.0 /TIER=FL /STK=0 /UG=Hs.32646 /LL=79675 /DEF=Homo sapiens hypothetical protein FLJ21901 (FLJ21901), mRNA. /PROD=hypothetical protein FLJ21901 /FL=gb:NM\_024622.1"\*2.225873997\*2.909875544\*hypothetical protein FLJ21901\*FLJ21901\*Hs.529276\*ENSG00000138399\*6915 // apoptosis // inferred from electronic annotation\*4672 // protein kinase activity //

inferred from electronic annotation /// 5524 // ATP binding // inferred from electronic annotation  
238035\_at\*gb:N66313 /DB\_XREF=gi:1218438 /DB\_XREF=yz38a07.s1  
/CLONE=IMAGE:285300 /FEA=EST /CNT=11 /TID=Hs.120770.0 /TIER=ConsEnd /STK=5  
/UG=Hs.120770 /UG\_TITLE=ESTs\*2.224475244\*2.944973851\*Sp3 transcription factor\*SP3\*Hs.531587\*ENSG00000172845\*6350 // transcription // inferred from electronic annotation /// 6355 // regulation of transcription, DNA-dependent // non-traceable author statement\*5634 // nucleus // non-traceable author statement\*3677 // DNA binding // inferred from electronic annotation /// 8270 // zinc ion binding // inferred from electronic annotation /// 16563 // transcriptional activator activity // non-traceable author statement /// 16564 // transcriptional repressor activit  
228367\_at\*"gb:BE551416 /DB\_XREF=gi:9793119 /DB\_XREF=7b64e10.x1  
/CLONE=IMAGE:3233034 /FEA=EST /CNT=29 /TID=Hs.55950.0 /TIER=Stack /STK=20  
/UG=Hs.55950 /UG\_TITLE=ESTs, Weakly similar to KIAA1330 protein (H.sapiens)\*2.220666363\*2.897973295\*alpha-kinase  
2\*ALPK2\*Hs.388674\*ENSG00000198796\*6468 // protein amino acid phosphorylation // inferred from electronic annotation\*\*4674 // protein serine/threonine kinase activity // inferred from electronic annotation /// 5524 // ATP binding // inferred from electronic annotation  
230147\_at\*gb:AI378647 /DB\_XREF=gi:4188500 /DB\_XREF=tc57a04.x1  
/CLONE=IMAGE:2068686 /FEA=EST /CNT=22 /TID=Hs.42502.0 /TIER=Stack /STK=11  
/UG=Hs.42502 /UG\_TITLE=ESTs\*2.217905202\*3.083959715\*coagulation factor II (thrombin) receptor-like 2\*F2RL2\*Hs.42502\*ENSG00000164220\*7165 // signal transduction // inferred from electronic annotation /// 7186 // G-protein coupled receptor protein signaling pathway // inferred from electronic annotation /// 7596 // blood coagulation // traceable author statement /// 9611 // response to \*5886 // plasma membrane // traceable author statement /// 5887 // integral to plasma membrane // traceable author statement\*1584 // rhodopsin-like receptor activity // inferred from electronic annotation /// 4435 // phosphoinositide phospholipase C activity // traceable author statement /// 4872 // receptor activity // inferred from electronic annotation /// 15057 // thrombin  
224469\_s\_at\*"gb:BC006173.1 /DB\_XREF=gi:13544085 /FEA=FLmRNA /CNT=1  
/TID=HsAffx.900892.1010 /TIER=FL /STK=0 /DEF=Homo sapiens, clone MGC:13251, mRNA, complete cds. /PROD=Unknown (protein for MGC:13251)  
/FL=gb:BC006173.1\*2.205421797\*2.659248712\*chromosome 14 open reading frame 151 /// chromosome 14 open reading frame  
151\*C14orf151\*Hs.317821\*ENSG00000130235\*16043 // cell organization and biogenesis // inferred from electronic annotation /// 30036 // actin cytoskeleton organization and biogenesis // inferred from electronic annotation\*\*3779 // actin binding // inferred from electronic annotation /// 17048 // Rho GTPase binding // inferred from electronic annotation  
223492\_s\_at\*"gb:BC004958.1 /DB\_XREF=gi:13436343 /FEA=FLmRNA /CNT=55  
/TID=Hs.326740.0 /TIER=FL /STK=0 /UG=Hs.326740 /DEF=Homo sapiens, Similar to leucine rich repeat (in FLII) interacting protein 1, clone MGC:10947, mRNA, complete cds. /PROD=Similar to leucine rich rep\*2.197747823\*5.30075484\*leucine rich repeat (in FLII) interacting protein 1\*LRRFIP1\*Hs.471779\*ENSG00000124831\*6357 // regulation of transcription from RNA polymerase II promoter // traceable author statement /// 16481 // negative regulation of transcription // non-traceable author statement\*5634 // nucleus // non-traceable author statement /// 5634 // nucleus // traceable author statement /// 5737 // cytoplasm // traceable author statement /// 5856 // cytoskeleton // traceable author statement\*3702 // RNA polymerase II transcription factor activity // not recorded /// 3725 // double-stranded RNA binding // traceable author statement /// 16564 // transcriptional repressor activity // non-traceable author statement  
232481\_s\_at\*gb:AL137517.1 /DB\_XREF=gi:6808177 /GEN=DKFZp56401278 /FEA=mRNA /CNT=7 /TID=Hs.306201.0 /TIER=ConsEnd /STK=0 /UG=Hs.306201 /LL=54773  
/DEF=Homo sapiens mRNA; cDNA DKFZp56401278 (from clone DKFZp56401278). /PROD=hypothetical protein\*2.19241537\*2.234621858\*"SLIT and NTRK-like family, member 6"\*SLITRK6\*Hs.525105\*ENSG00000184564\*\*16021 // integral to membrane // inferred from electronic annotation\*  
229572\_at\*gb:BF037662 /DB\_XREF=gi:10745973 /DB\_XREF=601462103F1  
/CLONE=IMAGE:3865344 /FEA=EST /CNT=17 /TID=Hs.25786.0 /TIER=Stack /STK=13  
/UG=Hs.25786 /UG\_TITLE=ESTs\*2.189866937\*3.014588081\*"Transcribed locus, moderately similar to XP\_508230.1 zinc finger protein 195 [Pan troglodytes]\*\*Hs.25786\*\*\*\*  
225703\_at\*gb:AL583509 /DB\_XREF=gi:12952541 /DB\_XREF=AL583509  
/CLONE=CS0DC009Y013 (5 prime) /FEA=mRNA /CNT=99 /TID=Hs.127270.0 /TIER=Stack /STK=24 /UG=Hs.127270 /LL=57666 /UG\_GENE=KIAA1545 /UG\_TITLE=KIAA1545 protein\*2.189121178\*3.050840991\*KIAA1545 protein\*KIAA1545\*Hs.411138\*\*\*\*  
212170\_at\*gb:BF447705 /DB\_XREF=gi:11512843 /DB\_XREF=7q94d07.x1  
/CLONE=IMAGE:3706021 /FEA=mRNA /CNT=219 /TID=Hs.180895.0 /TIER=Stack /STK=33  
/UG=Hs.180895 /LL=10137 /UG\_GENE=KIAA0765 /UG\_TITLE=putative brain nuclearly-targeted protein\*2.188325051\*2.257961539\*RNA binding motif protein 12\*RBM12\*Hs.246413\*ENSG00000125976\*\*5634 // nucleus // inferred from electronic annotation\*166 // nucleotide binding // inferred from electronic annotation /// 3676 // nucleic acid binding // inferred from electronic annotation /// 3723 // RNA binding // inferred from electronic annotation  
218494\_s\_at\*"gb:NM\_020062.1 /DB\_XREF=gi:13236503 /GEN=GEF /FEA=FLmRNA

/CNT=104 /TID=Hs.170088.0 /TIER=FL /STK=0 /UG=Hs.170088 /LL=56731 /DEF=Homo sapiens GLUT4 enhancer factor (GEF), mRNA. /PROD=GLUT4 enhancer factor /FL=gb:AF249267.3 gb:NM\_020062.1"•2.187741366•2.204163954•SLC2A4 regulator•SLC2A4RG•Hs.435126•ENSG00000125520"•6350 // transcription // inferred from electronic annotation /// 6355 // regulation of transcription, DNA-dependent // traceable author statement"•5634 // nucleus // non-traceable author statement•3700 // transcription factor activity // traceable author statement /// 8270 // zinc ion binding // inferred from electronic annotation

231806\_s\_at•gb:AL133630.1 /DB\_XREF=gi:6599272 /GEN=DKFZp434N0223 /FEA=FLmRNA /CNT=3 /TID=Hs.26996.1 /TIER=ConsEnd /STK=0 /UG=Hs.26996 /LL=27148 /DEF=Homo sapiens mRNA; cDNA DKFZp434N0223 (from clone DKFZp434N0223); partial cds. /PROD=hypothetical protein /FL=gb:AF200•2.186252902•6.249008772"•serine/threonine kinase 36 (fused homolog, Drosophila)"•STK36•Hs.471404•ENSG00000163482•6468 // protein amino acid phosphorylation // non-traceable author statement /// 7076 // mitotic chromosome condensation // inferred from electronic annotation"•4674 // protein serine/threonine kinase activity // non-traceable author statement /// 5488 // binding // inferred from electronic annotation /// 5524 // ATP binding // non-traceable author statement /// 16740 // transferase activity // inferred from elec

205930\_at•"gb:NM\_005513.1 /DB\_XREF=gi:5031726 /GEN=GTF2E1 /FEA=FLmRNA /CNT=28 /TID=Hs.145381.0 /TIER=FL+Stack /STK=10 /UG=Hs.145381 /LL=2960 /DEF=Homo sapiens general transcription factor IIE, polypeptide 1 (alpha subunit, 56kD) (GTF2E1), mRNA. /PROD=general transcr"•2.186176186•2.449048287"•general transcription factor IIE, polypeptide 1, alpha 56kDa"•GTF2E1•Hs.445272•ENSG00000153767"•6350 // transcription // inferred from electronic annotation /// 6355 // regulation of transcription, DNA-dependent // inferred from electronic annotation /// 6367 // transcription initiation from RNA polymerase II promoter // traceable author statement"•5634 // nucleus // inferred from electronic annotation /// 5673 // transcription factor TFIIE complex // not recorded•16251 // general RNA polymerase II transcription factor activity // not recorded

200988\_s\_at•"gb:NM\_005789.1 /DB\_XREF=gi:5031996 /GEN=PSME3 /FEA=FLmRNA /CNT=330 /TID=Hs.152978.0 /TIER=FL /STK=0 /UG=Hs.152978 /LL=10197 /DEF=Homo sapiens proteasome (prosome, macropain) activator subunit 3 (PA28 gamma; Ki) (PSME3), mRNA. /PROD=proteasome (prosome, ma"•2.173604313•2.909135876"•proteasome (prosome, macropain) activator subunit 3 (PA28 gamma; Ki)"•PSME3•Hs.152978•ENSG00000131467"•8537 // proteasome activator complex // inferred from electronic annotation•8538 // proteasome activator activity // inferred from electronic annotation

227143\_s\_at•"gb:AA706658 /DB\_XREF=gi:2716576 /DB\_XREF=ag90h05.r1 /CLONE=IMAGE:1141785 /FEA=EST /CNT=31 /TID=Hs.315689.1 /TIER=Stack /STK=20 /UG=Hs.315689 /UG\_TITLE=Homo sapiens cDNA: FLJ22373 fis, clone HRC06741"•2.17180362•2.275882422•BH3 interacting domain death agonist•BID•Hs.474150•ENSG0000015475•8625 // induction of apoptosis via death domain receptors // traceable author statement /// 8637 // apoptotic mitochondrial changes // traceable author statement /// 43065 // positive regulation of apoptosis // inferred from electronic annotation•5624 // membrane fraction // traceable author statement /// 5737 // cytoplasm // inferred from electronic annotation /// 5739 // mitochondrion // traceable author statement /// 5829 // cytosol // traceable author statement•5123 // death receptor binding // traceable author statement

242996\_at•"gb:AI341686 /DB\_XREF=gi:4078613 /DB\_XREF=qq95h06.x1 /CLONE=IMAGE:1939163 /FEA=EST /CNT=3 /TID=Hs.246268.0 /TIER=ConsEnd /STK=3 /UG=Hs.246268 /UG\_TITLE=ESTs, highly similar to RF1M\_HUMAN MITOCHONDRIAL PEPTIDE CHAIN RELEASE FACTOR 1 PRECURSOR (H.sapiens)"•2.163604023•2.022705133•mitochondrial translational release factor 1•MTRF1•Hs.382176•ENSG00000120662•6412 // protein biosynthesis // inferred from electronic annotation /// 6415 // translational termination // inferred from electronic annotation /// 6449 // regulation of translational termination // traceable author statement•5739 // mitochondrion // traceable author statement•3747 // translation release factor activity // inferred from electronic annotation /// 3747 // translation release factor activity // traceable author statement

206377\_at•"gb:NM\_001452.1 /DB\_XREF=gi:4557594 /GEN=FOXF2 /FEA=FLmRNA /CNT=15 /TID=Hs.44481.0 /TIER=FL+Stack /STK=8 /UG=Hs.44481 /LL=2295 /DEF=Homo sapiens forkhead box F2 (FOXF2), mRNA. /PROD=forkhead box F2 /FL=gb:U13220.1 gb:NM\_001452.1"•2.158766665•2.318718032•forkhead box F2•FOXF2•Hs.484423•ENSG00000137273"•6350 // transcription // inferred from electronic annotation /// 6355 // regulation of transcription, DNA-dependent // inferred from electronic annotation /// 6366 // transcription from RNA polymerase II promoter // not recorded"•5634 // nucleus // traceable author statement /// 5667 // transcription factor complex // traceable author statement•3700 // transcription factor activity // non-traceable author statement /// 3702 // RNA polymerase II transcription factor activity // not recorded /// 3713 // transcription coactivator activity // not recorded

224655\_at•gb:AA432267 /DB\_XREF=gi:2114655 /DB\_XREF=zw78e08.s1 /CLONE=IMAGE:782342 /FEA=FLmRNA /CNT=268 /TID=Hs.43436.1 /TIER=Stack /STK=30 /UG=Hs.43436 /LL=50808 /UG\_GENE=AKL3L /UG\_TITLE=adenylate kinase 3 alpha like /FL=gb:NM\_016282.1 gb:AB021870.1"•2.154872507•2.291640888•adenylate kinase

3•AK3•Hs.493362•ENSG00000147853•"6139 // nucleobase, nucleoside, nucleotide and nucleic acid metabolism // inferred from electronic annotation /// 8652 // amino acid biosynthesis // inferred from electronic annotation"•5739 // mitochondrion // inferred from electronic annotation /// 5739 // mitochondrion // inferred from sequence or structural similarity•4017 // adenylate kinase activity // inferred from electronic annotation /// 4017 // adenylate kinase activity // not recorded /// 4765 // shikimate kinase activity // inferred from electronic annotation /// 5524 // ATP binding // inferred from electronic

225943\_at•gb:BF222737 /DB\_XREF=gi:11129828 /DB\_XREF=7q32e10.x1 /CLONE=IMAGE:3699955 /FEA=mRNA /CNT=84 /TID=Hs.22151.1 /TIER=Stack /STK=10 /UG=Hs.22151 /LL=57486 /UG\_GENE=KIAA1226 /UG\_TITLE=KIAA1226 protein•2.15318262•2.273737937•neurolysin (metallopeptidase M3 family)•NLN•Hs.247460•ENSG00000123213•6508 // proteolysis and peptidolysis // inferred from electronic annotation•5739 // mitochondrion // inferred from electronic annotation•4222 // metalloendopeptidase activity // inferred from electronic annotation /// 8270 // zinc ion binding // inferred from electronic annotation /// 16787 // hydrolase activity // inferred from electronic annotation

203874\_s\_at•"gb:NM\_003069.1 /DB\_XREF=gi:4507066 /GEN=SMARCA1 /FEA=FLmRNA /CNT=98 /TID=Hs.152292.0 /TIER=FL+Stack /STK=28 /UG=Hs.152292 /LL=6594 /DEF=Homo sapiens SWISNF related, matrix associated, actin dependent regulator of chromatin, subfamily a, member 1 (SMARCA1)"•2.145924929•2.398900649•"SWI/SNF related, matrix associated, actin dependent regulator of chromatin, subfamily a, member 1"•SMARCA1•Hs.152292•ENSG00000102038•"6338 // chromatin remodeling // traceable author statement /// 6350 // transcription // inferred from electronic annotation /// 6355 // regulation of transcription, DNA-dependent // inferred from electronic annotation"•5634 // nucleus // inferred from electronic annotation /// 5634 // nucleus // traceable author statement•3677 // DNA binding // inferred from electronic annotation /// 4386 // helicase activity // inferred from electronic annotation /// 4386 // helicase activity // traceable author statement /// 5524 // ATP binding // inferred from electronic annotation ///

211684\_s\_at•"gb:AF250307.1 /DB\_XREF=gi:13649464 /FEA=FLmRNA /CNT=1 /TID=HsAffx.900515.594 /TIER=FL /STK=0 /DEF=Homo sapiens cytoplasmic dynein intermediate chain 2C mRNA, complete cds. /PROD=cytoplasmic dynein intermediate chain 2C /FL=gb:AF250307.1"•2.141391738•2.165141845•"dynein, cytoplasmic, intermediate polypeptide 2 /// dynein, cytoplasmic, intermediate polypeptide 2"•DNCI2•Hs.546250•ENSG00000077380•7018 // microtubule-based movement // non-traceable author statement•5737 // cytoplasm // non-traceable author statement /// 30286 // dynein complex // inferred from electronic annotation•3777 // microtubule motor activity // non-traceable author statement

238880\_at•gb:AI241331 /DB\_XREF=gi:3836728 /DB\_XREF=qk17c02.x1 /CLONE=IMAGE:1869218 /FEA=EST /CNT=7 /TID=Hs.131765.0 /TIER=ConsEnd /STK=1 /UG=Hs.131765 /UG\_TITLE=ESTs•2.141091724•2.900411142•general transcription factor IIIA•GTF3A•Hs.445977•ENSG00000122034•"6350 // transcription // inferred from electronic annotation /// 6355 // regulation of transcription, DNA-dependent // inferred from electronic annotation /// 6383 // transcription from RNA polymerase III promoter // traceable author statement /// 9303 ///"•5634 // nucleus // inferred from electronic annotation•3677 // DNA binding // inferred from electronic annotation /// 3709 // RNA polymerase III transcription factor activity // traceable author statement /// 3723 // RNA binding // inferred from electronic annotation /// 8270 // zinc ion binding // inferred f

224995\_at•gb:AJ277587.1 /DB\_XREF=gi:8920229 /GEN=Spir-1 /FEA=mRNA /CNT=163 /TID=Hs.16758.0 /TIER=Stack /STK=39 /UG=Hs.16758 /LL=56907 /DEF=Homo sapiens partial mRNA for Spir-1 protein (Spir-1 gene). /PROD=Spir-1 protein•2.134906775•2.153281215•spire homolog 1 (Drosophila)•SPIRE1•Hs.515283•ENSG00000134278•"5634 // nucleus // inferred from electronic annotation•

230130\_at•gb:AI692523 /DB\_XREF=gi:4969863 /DB\_XREF=wd73d06.x1 /CLONE=IMAGE:2337227 /FEA=EST /CNT=13 /TID=Hs.110373.1 /TIER=Stack /STK=10 /UG=Hs.110373 /UG\_TITLE=ESTs•2.130605708•3.910086543•Slit homolog 2 (Drosophila)•SLIT2•Hs.29802•ENSG00000145147•1657 // ureteric bud development // inferred from mutant phenotype /// 6935 // chemotaxis // inferred from electronic annotation /// 7155 // cell adhesion // inferred from electronic annotation /// 7186 // G-protein coupled receptor protein signaling path•5615 // extracellular space // not recorded /// 16021 // integral to membrane // inferred from electronic annotation•4963 // follicle stimulating hormone receptor activity // inferred from electronic annotation /// 5102 // receptor binding // traceable author statement /// 5198 // structural molecule activity // inferred from electronic annotation /// 5509 // calcium io

231766\_s\_at•gb:U73778.1 /DB\_XREF=gi:1846004 /GEN=COL12A1 /FEA=FLmRNA /CNT=26 /TID=Hs.101302.0 /TIER=ConsEnd /STK=0 /UG=Hs.101302 /LL=1303 /DEF=Human collagen type XII alpha-1 precursor (COL12A1) mRNA. /PROD=collagen type XII alpha-1 /FL=gb:NM\_004370.3•2.12937992•2.719933315•"collagen, type XII, alpha 1"•COL12A1•Hs.101302•ENSG00000111799•1501 // skeletal development // traceable author statement /// 6817 // phosphate transport // inferred from electronic annotation /// 7155 // cell adhesion // inferred from electronic

annotation /// 30199 // collagen fibril organization // non-traceable a•5578  
// extracellular matrix (sensu Metazoa) // inferred from electronic  
annotation /// 5595 // collagen type XII // non-traceable author statement  
/// 5595 // collagen type XII // traceable author statement /// 5737 //  
cytoplasm // inferred from electron•5198 // structural molecule activity //  
inferred from electronic annotation /// 5515 // protein binding // inferred  
from electronic annotation /// 30020 // extracellular matrix structural  
constituent conferring tensile strength // non-traceable author sta  
210868\_s\_at•"gb:BC001305.1 /DB\_XREF=gi:12654918 /FEA=FLmRNA /CNT=2  
/TID=Hs.211556.1 /TIER=FL /STK=0 /UG=Hs.211556 /LL=79071 /UG\_GENE=MGC5487  
/DEF=Homo sapiens, clone MGC:5487, mRNA, complete cds. /PROD=Unknown (protein  
for MGC:5487) /FL=gb:BC001305.1"•2.129329528•2.591424322•"ELOVL family member  
6, elongation of long chain fatty acids (FEN1/Elo2, SUR4/Elo3-like,  
yeast)"•ELOVL6•Hs.412939•ENSG00000170522••16021 // integral to membrane //  
inferred from electronic annotation•  
232181\_at•"gb:AU157049 /DB\_XREF=gi:11018570 /DB\_XREF=AU157049  
/CLONE=PLACE1005898 /FEA=mRNA /CNT=11 /TID=Hs.159475.0 /TIER=ConsEnd /STK=3  
/UG=Hs.159475 /UG\_TITLE=Homo sapiens cDNA FLJ14284 fis, clone  
PLACE1005898"•2.127169268•3.531424951•hypothetical protein  
LOC153346•LOC153346•••••  
202925\_s\_at•"gb:NM\_002657.2 /DB\_XREF=gi:6031195 /GEN=PLAGL2 /FEA=FLmRNA  
/CNT=148 /TID=Hs.154104.0 /TIER=FL+Stack /STK=58 /UG=Hs.154104 /LL=5326  
/DEF=Homo sapiens pleiomorphic adenoma gene-like 2 (PLAGL2), mRNA.  
/PROD=pleiomorphic adenoma gene-like 2  
/FL=gb:NM\_002657.2"•2.124718537•3.492289387•pleiomorphic adenoma gene-like  
2•PLAGL2•Hs.154104•ENSG00000126003"•6350 // transcription // inferred from  
electronic annotation /// 6355 // regulation of transcription, DNA-dependent  
// inferred from electronic annotation"•5634 // nucleus // inferred from  
electronic annotation•3700 // transcription factor activity // traceable  
author statement /// 8270 // zinc ion binding // inferred from electronic  
annotation  
227261\_at•"gb:AA020010 /DB\_XREF=gi:1483683 /DB\_XREF=ze62f10.s1  
/CLONE=IMAGE:363595 /FEA=EST /CNT=35 /TID=Hs.294018.0 /TIER=Stack /STK=13  
/UG=Hs.294018 /UG\_TITLE=ESTs•2.120400755•2.488821862•Kruppel-like factor  
12•KLF12•Hs.373857•ENSG00000118922•6350 // transcription // inferred from  
electronic annotation /// 6357 // regulation of transcription from RNA  
polymerase II promoter // traceable author statement•5634 // nucleus //  
inferred from electronic annotation•3700 // transcription factor activity //  
traceable author statement /// 3714 // transcription corepressor activity //  
traceable author statement /// 8270 // zinc ion binding // inferred from  
electronic annotation  
204540\_at•"gb:NM\_001958.1 /DB\_XREF=gi:4503474 /GEN=EEF1A2 /FEA=FLmRNA  
/CNT=112 /TID=Hs.2642.0 /TIER=FL+Stack /STK=16 /UG=Hs.2642 /LL=1917 /DEF=Homo  
sapiens eukaryotic translation elongation factor 1 alpha 2 (EEF1A2), mRNA.  
/PROD=eukaryotic translation elongation  
fac"•2.118715748•2.868424992•eukaryotic translation elongation factor 1 alpha  
2•EEF1A2•Hs.433839•ENSG00000101210•6412 // protein biosynthesis // inferred  
from electronic annotation /// 6414 // translational elongation // inferred  
from electronic annotation•5634 // nucleus // inferred from electronic  
annotation /// 5737 // cytoplasm // inferred from electronic annotation•3746  
// translation elongation factor activity // inferred from electronic  
annotation /// 5525 // GTP binding // inferred from electronic annotation  
208995\_s\_at•"gb:U40763.1 /DB\_XREF=gi:1117967 /FEA=FLmRNA /CNT=195  
/TID=Hs.77965.0 /TIER=FL /STK=0 /UG=Hs.77965 /LL=9360 /UG\_GENE=PPIG  
/DEF=Human Clk-associated RS cyclophilin CARS-Cyp mRNA, complete cds.  
/PROD=CARS-Cyp /FL=gb:NM\_004792.1  
gb:U40763.1"•2.117453557•2.027158489•peptidyl-prolyl isomerase G (cyclophilin  
G)•PPIG•Hs.470544•ENSG00000138398•6457 // protein folding // inferred from  
electronic annotation /// 8380 // RNA splicing // traceable author  
statement•5654 // nucleoplasm // traceable author statement•3755 //  
peptidyl-prolyl cis-trans isomerase activity // inferred from electronic  
annotation /// 16018 // cyclosporin A binding // traceable author statement  
/// 16853 // isomerase activity // inferred from electronic annotation  
203159\_at•"gb:NM\_014905.1 /DB\_XREF=gi:7662327 /GEN=GLS /FEA=FLmRNA /CNT=140  
/TID=Hs.239189.0 /TIER=FL+Stack /STK=52 /UG=Hs.239189 /LL=2744 /DEF=Homo  
sapiens glutaminase (GLS), mRNA. /PROD=glutaminase C /FL=gb:AF223943.1  
gb:AF327434.1 gb:NM\_014905.1 gb:AB020645.1  
gb:"•2.109268267•2.020916554•glutaminase•GLS•Hs.116448•ENSG00000115419•6543  
// glutamine catabolism // non-traceable author statement•5739 //  
mitochondrion // non-traceable author statement•4359 // glutaminase activity  
// non-traceable author statement /// 16787 // hydrolase activity // inferred  
from electronic annotation  
1553764\_a\_at•"gb:NM\_032876.1 /DB\_XREF=gi:14249621 /TID=Hs2.64552.1 /CNT=12  
/FEA=FLmRNA /TIER=FL /STK=0 /LL=84962 /UG\_GENE=JUB /UG=Hs.64552  
/UG\_TITLE=jub, ajuba homolog (Xenopus laevis) /DEF=Homo sapiens jub, ajuba  
homolog (Xenopus laevis) (JUB), mRNA.  
/FL=gb:NM\_032876."•2.099279274•4.992485733•"jub, ajuba homolog (Xenopus  
laevis)"•JUB•Hs.508910•ENSG00000129474••8270 // zinc ion binding // inferred  
from electronic annotation  
241687\_at•"gb:BE886288 /DB\_XREF=gi:10340244 /DB\_XREF=601509872F1  
/CLONE=IMAGE:3911656 /FEA=EST /CNT=5 /TID=Hs.155775.0 /TIER=ConsEnd /STK=0

/UG=Hs.155775 /UG\_TITLE=ESTs•2.098108031•3.681359734•Transcribed  
locus••Hs.155775••••  
235147\_at•gb:R56118 /DB\_XREF=gi:826224 /DB\_XREF=yg94d01.s1 /CLONE=IMAGE:41385  
/FEA=EST /CNT=17 /TID=Hs.177788.0 /TIER=ConsEnd /STK=0 /UG=Hs.177788  
/UG\_TITLE=ESTs•2.093624047•2.654197554•Hypothetical gene supported by  
AK096649••Hs.528187••••  
226166\_x\_at•gb:AU149216 /DB\_XREF=gi:11010737 /DB\_XREF=AU149216  
/CLONE=NT2RM4001836 /FEA=mRNA /CNT=64 /TID=Hs.26996.0 /TIER=Stack /STK=31  
/UG=Hs.26996 /LL=27148 /UG\_GENE=KIAA1278 /UG\_TITLE=KIAA1278  
protein•2.08641926•2.500748169•"serine/threonine kinase 36 (fused homolog,  
Drosophila)"•STK36•Hs.471404•ENSG00000163482•6468 // protein amino acid  
phosphorylation // non-traceable author statement /// 7076 // mitotic  
chromosome condensation // inferred from electronic annotation••4674 //  
protein serine/threonine kinase activity // non-traceable author statement  
/// 5488 // binding // inferred from electronic annotation /// 5524 // ATP  
binding // non-traceable author statement /// 16740 // transferase activity  
// inferred from elec  
203875\_at•"gb:NM\_003069.1 /DB\_XREF=gi:4507066 /GEN=SMARCA1 /FEA=FLmRNA  
/CNT=98 /TID=Hs.152292.0 /TIER=FL+Stack /STK=28 /UG=Hs.152292 /LL=6594  
/DEF=Homo sapiens SWISNF related, matrix associated, actin dependent  
regulator of chromatin, subfamily a, member 1  
(SMARCA1)"•2.086187632•2.96295447•"SWI/SNF related, matrix associated, actin  
dependent regulator of chromatin, subfamily a, member  
1"•SMARCA1•Hs.152292•ENSG00000102038•"6338 // chromatin remodeling //  
traceable author statement /// 6350 // transcription // inferred from  
electronic annotation /// 6355 // regulation of transcription, DNA-dependent  
// inferred from electronic annotation"•5634 // nucleus // inferred from  
electronic annotation /// 5634 // nucleus // traceable author statement•3677  
// DNA binding // inferred from electronic annotation /// 4386 // helicase  
activity // inferred from electronic annotation /// 4386 // helicase activity  
// traceable author statement /// 5524 // ATP binding // inferred from  
electronic annotation ///  
244686\_at•gb:AI939467 /DB\_XREF=gi:5678430 /DB\_XREF=tf28h05.x5  
/CLONE=IMAGE:2097561 /FEA=EST /CNT=3 /TID=Hs.161210.0 /TIER=ConsEnd /STK=3  
/UG=Hs.161210 /UG\_TITLE=ESTs•2.082787556•2.4543356•Treacher  
Collins-Franceschetti syndrome 1•TCOF1•Hs.519672•ENSG00000070814•1501 //  
skeletal development // traceable author statement /// 6810 // transport //  
inferred from electronic annotation•5634 // nucleus // inferred from  
electronic annotation /// 5730 // nucleolus // traceable author  
statement•5215 // transporter activity // traceable author statement  
219559\_at•"gb:NM\_022082.1 /DB\_XREF=gi:11545794 /GEN=FLJ23412 /FEA=FLmRNA  
/CNT=29 /TID=Hs.34487.0 /TIER=FL+Stack /STK=24 /UG=Hs.34487 /LL=63910  
/DEF=Homo sapiens hypothetical protein FLJ23412 (FLJ23412), mRNA.  
/PROD=hypothetical protein FLJ23412  
/FL=gb:NM\_022082.1"•2.082337262•2.861953839•chromosome 20 open reading frame  
59•C20orf59•Hs.512686•ENSG00000101194•6810 // transport // inferred from  
electronic annotation•16020 // membrane // inferred from electronic  
annotation /// 16021 // integral to membrane // inferred from electronic  
annotation•5215 // transporter activity // inferred from electronic  
annotation  
225202\_at•gb:BE620739 /DB\_XREF=gi:9891677 /DB\_XREF=601483201T1  
/CLONE=IMAGE:3885601 /FEA=EST /CNT=142 /TID=Hs.10432.0 /TIER=Stack /STK=69  
/UG=Hs.10432 /UG\_TITLE=ESTs•2.068828957•2.118237802•Rho-related BTB domain  
containing 3•RHOBTB3•Hs.445030•ENSG00000164292•••3924 // GTPase activity //  
non-traceable author statement /// 5515 // protein binding // inferred from  
electronic annotation  
224428\_s\_at•"gb:AY029179.1 /DB\_XREF=gi:13641303 /GEN=JP1 /FEA=FLmRNA /CNT=1  
/TID=HsAffx.900675.874 /TIER=FL /STK=0 /DEF=Homo sapiens c-Myc target JP1  
(JP1) mRNA, complete cds. /PROD=c-Myc target JP1  
/FL=gb:AY029179.1"•2.068601364•2.551220643•cell division cycle associated 7  
/// cell division cycle associated 7•CDCA7•Hs.470654•ENSG00000144354•910 //  
cytokinesis // inferred from electronic annotation••  
224151\_s\_at•"gb:AF183419.1 /DB\_XREF=gi:9963776 /FEA=FLmRNA /CNT=2  
/TID=Hs.43436.0 /TIER=FL /STK=0 /UG=Hs.43436 /LL=50808 /UG\_GENE=AKL3L  
/DEF=Homo sapiens GTP:AMP phosphotransferase mRNA, complete cds; nuclear gene  
for mitochondrial product. /PROD=GTP:AMP  
phosphotransf"•2.065756364•2.460862268•adenylate kinase  
3•AK3•Hs.493362•ENSG00000147853•"6139 // nucleobase, nucleoside, nucleotide  
and nucleic acid metabolism // inferred from electronic annotation /// 8652  
// amino acid biosynthesis // inferred from electronic annotation"•5739 //  
mitochondrion // inferred from electronic annotation /// 5739 //  
mitochondrion // inferred from sequence or structural similarity•4017 //  
adenylate kinase activity // inferred from electronic annotation /// 4017 //  
adenylate kinase activity // not recorded /// 4765 // shikimate kinase  
activity // inferred from electronic annotation /// 5524 // ATP binding //  
inferred from electronic  
1556121\_at•"gb:AK021751.1 /DB\_XREF=gi:10432997 /TID=Hs2.419776.1 /CNT=28  
/FEA=mRNA /TIER=ConsEnd /STK=5 /UG=Hs.419776 /UG\_TITLE=Homo sapiens cDNA  
FLJ11689 fis, clone HEMBA1004977. /DEF=Homo sapiens cDNA FLJ11689 fis, clone  
HEMBA1004977."•2.058627156•2.383566787•Nucleosome assembly protein 1-like  
1•NAP1L1•Hs.524599•ENSG00000187109•6260 // DNA replication // traceable



author statement /// 6334 // nucleosome assembly // traceable author  
statement /// 8284 // positive regulation of cell proliferation // traceable  
author statement•5634 // nucleus // inferred from electronic annotation ///  
5678 // chromatin assembly complex // traceable author statement•  
203574\_at•"gb:NM\_005384.1 /DB\_XREF=gi:4885516 /GEN=NFIL3 /FEA=FLmRNA /CNT=96  
/TID=Hs.79334.0 /TIER=FL+Stack /STK=37 /UG=Hs.79334 /LL=4783 /DEF=Homo  
sapiens nuclear factor, interleukin 3 regulated (NFIL3), mRNA. /PROD=nuclear  
factor, interleukin 3 regulated /FL=gb:NM"•2.058042334•3.586866201•"nuclear  
factor, interleukin 3 regulated"•NFIL3•Hs.79334•ENSG00000165030•"6355 //  
regulation of transcription, DNA-dependent // inferred from electronic  
annotation /// 6366 // transcription from RNA polymerase II promoter //  
traceable author statement /// 6955 // immune response // traceable author  
statement"•5634 // nucleus // traceable author statement•3700 //  
transcription factor activity // traceable author statement /// 3714 //  
transcription corepressor activity // traceable author statement  
210764\_s\_at•"gb:AF003114.1 /DB\_XREF=gi:6649848 /GEN=CYR61 /FEA=FLmRNA /CNT=3  
/TID=Hs.8867.1 /TIER=FL /STK=0 /UG=Hs.8867 /LL=3491 /UG\_TITLE=cysteine-rich,  
angiogenic inducer, 61 /DEF=Homo sapiens CYR61 mRNA, complete cds.  
/FL=gb:AF003114.1"•2.057980668•2.547293996•"cysteine-rich, angiogenic  
inducer, 61"•CYR61•Hs.8867•ENSG00000142871•1558 // regulation of cell growth  
// inferred from electronic annotation /// 6935 // chemotaxis // inferred  
from electronic annotation /// 7155 // cell adhesion // inferred from  
electronic annotation /// 7600 // sensory perception // inferred from  
electro•5576 // extracellular region // inferred from electronic  
annotation•5520 // insulin-like growth factor binding // inferred from  
electronic annotation /// 8201 // heparin binding // inferred from electronic  
annotation  
229083\_at•gb:AI672356 /DB\_XREF=gi:4852087 /DB\_XREF=ty64c02.x1  
/CLONE=IMAGE:2283842 /FEA=EST /CNT=15 /TID=Hs.96996.0 /TIER=Stack /STK=15  
/UG=Hs.96996 /UG\_TITLE=ESTs•2.056405047•2.006488979•Heterogeneous nuclear  
ribonucleoprotein A0•HNRPA0•Hs.96996•ENSG00000177733•6397 // mRNA processing  
// traceable author statement•30530 // heterogeneous nuclear  
ribonucleoprotein complex // traceable author statement•166 // nucleotide  
binding // inferred from electronic annotation /// 3723 // RNA binding //  
traceable author statement  
209897\_s\_at•"gb:AF055585.1 /DB\_XREF=gi:4151204 /FEA=FLmRNA /CNT=39  
/TID=Hs.29802.1 /TIER=FL /STK=0 /UG=Hs.29802 /LL=9353 /UG\_GENE=SLIT2  
/DEF=Homo sapiens neurogenic extracellular slit protein Slit2 mRNA, complete  
cds. /PROD=neurogenic extracellular slit protein Slit2  
"•2.052969788•3.115307187•slit homolog 2  
(Drosophila)•SLIT2•Hs.29802•ENSG00000145147•1657 // ureteric bud development  
// inferred from mutant phenotype /// 6935 // chemotaxis // inferred from  
electronic annotation /// 7155 // cell adhesion // inferred from electronic  
annotation /// 7186 // G-protein coupled receptor protein signaling path•5615  
// extracellular space // not recorded /// 16021 // integral to membrane //  
inferred from electronic annotation•4963 // follicle stimulating hormone  
receptor activity // inferred from electronic annotation /// 5102 // receptor  
binding // traceable author statement /// 5198 // structural molecule  
activity // inferred from electronic annotation /// 5509 // calcium io  
226316\_at•gb:BF592957 /DB\_XREF=gi:11685281 /DB\_XREF=7j97d11.x1  
/CLONE=IMAGE:3442629 /FEA=EST /CNT=45 /TID=Hs.104413.0 /TIER=Stack /STK=26  
/UG=Hs.104413 /UG\_TITLE=ESTs•2.049595349•3.382698928•"CDNA clone  
IMAGE:5295896, partial cds"••Hs.224080••••  
219470\_x\_at•"gb:NM\_019084.1 /DB\_XREF=gi:9506628 /GEN=FLJ10895 /FEA=FLmRNA  
/CNT=35 /TID=Hs.281348.0 /TIER=FL /STK=1 /UG=Hs.281348 /LL=54619 /DEF=Homo  
sapiens hypothetical protein FLJ10895 (FLJ10895), mRNA. /PROD=hypothetical  
protein FLJ10895 /FL=gb:NM\_019084.1"•2.048303242•2.911399121•cyclin  
J•CCNJ•Hs.281348•ENSG00000107443•74 // regulation of cell cycle // inferred  
from electronic annotation•5634 // nucleus // inferred from electronic  
annotation•  
214919\_s\_at•gb:R39094 /DB\_XREF=gi:796550 /DB\_XREF=yf50c09.s1  
/CLONE=IMAGE:25528 /FEA=mRNA /CNT=10 /TID=Hs.301226.2 /TIER=ConsEnd /STK=0  
/UG=Hs.301226 /LL=57450 /UG\_GENE=KIAA1085 /UG\_TITLE=KIAA1085  
protein•2.047639336•3.437818512•eukaryotic translation initiation factor 4E  
binding protein 3 /// MASK-4E-BP3 alternate reading frame gene•EIF4EBP3 ///  
MASK-BP3••ENSG00000131503•6445 // regulation of translation // inferred from  
electronic annotation /// 17148 // negative regulation of protein  
biosynthesis // inferred from electronic annotation /// 45947 // negative  
regulation of translational initiation // non-traceable author s•16281 //  
eukaryotic translation initiation factor 4F complex // non-traceable author  
statement•8190 // eukaryotic initiation factor 4E binding // inferred from  
electronic annotation /// 30371 // translation repressor activity //  
non-traceable author statement /// 3676 // nucleic acid binding // inferred  
from electronic annotation  
242584\_at•gb:AI954412 /DB\_XREF=gi:5746722 /DB\_XREF=wr49a05.x1  
/CLONE=IMAGE:2490992 /FEA=EST /CNT=7 /TID=Hs.98427.0 /TIER=ConsEnd /STK=0  
/UG=Hs.98427 /UG\_TITLE=ESTs•2.045313129•2.349988904•hypothetical protein  
FLJ13305•FLJ13305•Hs.440466•ENSG00000170264••••  
228308\_at•gb:AI452444 /DB\_XREF=gi:4285654 /DB\_XREF=tj62a09.x1  
/CLONE=IMAGE:2146072 /FEA=EST /CNT=19 /TID=Hs.24048.1 /TIER=Stack /STK=9  
/UG=Hs.24048 /LL=51303 /UG\_GENE=LOC51303 /UG\_TITLE=FK506 binding protein

precursor•2.043707227•2.914934374•"FK506 binding protein 11, 19 kDa"•FKBP11•Hs.438695•ENSG00000134285•6457 // protein folding // inferred from electronic annotation••3755 // peptidyl-prolyl cis-trans isomerase activity // inferred from electronic annotation /// 16853 // isomerase activity // inferred from electronic annotation  
233518\_at•"gb:AU144449 /DB\_XREF=gi:11005970 /DB\_XREF=AU144449 /CLONE=HEMBA1001940 /FEA=mRNA /CNT=3 /TID=Hs.324024.0 /TIER=ConsEnd /STK=1 /UG=Hs.324024 /UG\_TITLE=Homo sapiens cDNA FLJ11493 fis, clone HEMBA1001940"•2.042813572•6.830071568•Clone pp9372 unknown mRNA••Hs.469287••••  
221731\_x\_at•gb:BF218922 /DB\_XREF=gi:11112418 /DB\_XREF=601885091F1 /CLONE=IMAGE:4103447 /FEA=mRNA /CNT=344 /TID=Hs.81800.4 /TIER=Stack /STK=72 /UG=Hs.81800 /LL=1462 /UG\_GENE=CSPG2 /UG\_TITLE=chondroitin sulfate proteoglycan 2 (versican)•2.035585844•2.346026753•chondroitin sulfate proteoglycan 2 (versican)•CSPG2•Hs.443681•ENSG00000038427•7275 // development // traceable author statement /// 8037 // cell recognition // traceable author statement•5578 // extracellular matrix (sensu Metazoa) // traceable author statement•5509 // calcium ion binding // inferred from electronic annotation /// 5529 // sugar binding // inferred from electronic annotation /// 5540 // hyaluronic acid binding // traceable author statement  
202786\_at•"gb:NM\_013233.1 /DB\_XREF=gi:7019542 /GEN=SPAK /FEA=FLmRNA /CNT=138 /TID=Hs.199263.0 /TIER=FL+Stack /STK=50 /UG=Hs.199263 /LL=27347 /DEF=Homo sapiens Ste-20 related kinase (SPAK), mRNA. /PROD=Ste-20 related kinase /FL=gb:NM\_013233.1 gb:AF030403.1 gb:AF09998"•2.033782057•2.577912573•"serine threonine kinase 39 (STE20/SPS1 homolog, yeast)"•STK39•Hs.276271•ENSG00000198648•6468 // protein amino acid phosphorylation // non-traceable author statement /// 6950 // response to stress // non-traceable author statement•5634 // nucleus // non-traceable author statement /// 5737 // cytoplasm // non-traceable author statement•4702 // receptor signaling protein serine/threonine kinase activity // non-traceable author statement /// 4713 // protein-tyrosine kinase activity // inferred from electronic annotation /// 5524 // ATP binding // non-traceable author statement /// 16740 /  
1555765\_a\_at•"gb:AF493872.1 /DB\_XREF=gi:20147636 /GEN=GNG4 /TID=Hs2.32976.3 /CNT=1 /FEA=FLmRNA /TIER=FL /STK=1 /LL=2786 /UG=Hs.32976 /DEF=Homo sapiens guanine nucleotide binding protein gamma 4 (GNG4) mRNA, complete cds. /PROD=guanine nucleotide binding protein gamma 4"•2.020614872•3.023647346•"guanine nucleotide binding protein (G protein), gamma 4"•GNG4•Hs.159711•ENSG00000168243•7165 // signal transduction // inferred from electronic annotation /// 8277 // regulation of G-protein coupled receptor protein signaling pathway // traceable author statement•5834 // heterotrimeric G-protein complex // inferred from electronic annotation /// 5886 // plasma membrane // traceable author statement•4871 // signal transducer activity // inferred from electronic annotation  
212624\_s\_at•gb:BF339445 /DB\_XREF=gi:11285900 /DB\_XREF=602038795F1 /CLONE=IMAGE:4186582 /FEA=mRNA /CNT=135 /TID=Hs.169965.1 /TIER=Stack /STK=42 /UG=Hs.169965 /LL=1123 /UG\_GENE=CHN1 /UG\_TITLE=chimerin (chimaerin) 1•2.013541258•2.268678916•chimerin (chimaerin) 1•CHN1•Hs.380138•ENSG00000128656•7242 // intracellular signaling cascade // inferred from electronic annotation••5070 // SH3/SH2 adaptor activity // traceable author statement /// 5096 // GTPase activator activity // not recorded /// 19992 // diacylglycerol binding // inferred from electronic annotation  
235573\_at•gb:AL536101 /DB\_XREF=gi:12799594 /DB\_XREF=AL536101 /CLONE=CS0DF022YM06 (3 prime) /FEA=EST /CNT=11 /TID=Hs.201615.0 /TIER=ConsEnd /STK=0 /UG=Hs.201615 /UG\_TITLE=ESTs•2.013374408•4.312608304•Heat shock 105kDa/110kDa protein 1•HSPH1•Hs.36927•ENSG00000120694•6457 // protein folding // inferred from electronic annotation /// 6986 // response to unfolded protein // traceable author statement•5737 // cytoplasm // traceable author statement•5524 // ATP binding // inferred from electronic annotation  
204693\_at•"gb:NM\_007061.1 /DB\_XREF=gi:5902007 /GEN=MSE55 /FEA=FLmRNA /CNT=57 /TID=Hs.148101.0 /TIER=FL /STK=0 /UG=Hs.148101 /LL=11135 /DEF=Homo sapiens serum constituent (MSE55), mRNA. /PROD=serum constituent protein /FL=gb:M88338.1 gb:NM\_007061.1"•2.010641162•2.873314705•CDC42 effector protein (Rho GTPase binding) 1•CDC42EP1•Hs.474797•ENSG00000128283•7275 // development // traceable author statement•5615 // extracellular space // traceable author statement•  
235392\_at•gb:BG403162 /DB\_XREF=gi:13296610 /DB\_XREF=602418990F1 /CLONE=IMAGE:4525798 /FEA=EST /CNT=14 /TID=Hs.43845.0 /TIER=ConsEnd /STK=0 /UG=Hs.43845 /UG\_TITLE=ESTs•2.00716042•2.315951359•Insulin receptor substrate 1•IRS1•Hs.471508•ENSG00000169047•7165 // signal transduction // traceable author statement•5737 // cytoplasm // traceable author statement•4871 // signal transducer activity // traceable author statement /// 5069 // transmembrane receptor protein tyrosine kinase docking protein activity // traceable author statement /// 5158 // insulin receptor binding // inferred from electronic annotation  
229700\_at•gb:BE966267 /DB\_XREF=gi:11771500 /DB\_XREF=601660507R1 /CLONE=IMAGE:3906240 /FEA=EST /CNT=10 /TID=Hs.158101.0 /TIER=Stack /STK=9 /UG=Hs.158101 /UG\_TITLE=ESTs•2.00709271•2.365285405•hypothetical protein LOC148203•LOC148203•Hs.359535•"6355 // regulation of transcription, DNA-dependent // inferred from electronic annotation"•5622 // intracellular

// inferred from electronic annotation•3676 // nucleic acid binding //  
inferred from electronic annotation  
227682\_at•"gb:BE645154 /DB\_XREF=gi:9969389 /DB\_XREF=7e64b02.x1  
/CLONE=IMAGE:3287211 /FEA=EST /CNT=33 /TID=Hs.99216.0 /TIER=Stack /STK=22  
/UG=Hs.99216 /UG\_TITLE=ESTs, Moderately similar to ALU8\_HUMAN ALU SUBFAMILY  
SX SEQUENCE CONTAMINATION WARNING ENTRY  
(H.sapiens)"•0.498765774•0.465094396•Transcribed locus•Hs.99216••••  
204359\_at•"gb:NM\_013231.1 /DB\_XREF=gi:7019380 /GEN=FLRT2 /FEA=FLmRNA /CNT=86  
/TID=Hs.48998.0 /TIER=FL+Stack /STK=27 /UG=Hs.48998 /LL=23768 /DEF=Homo  
sapiens fibronectin leucine rich transmembrane protein 2 (FLRT2), mRNA.  
/PROD=fibronectin leucine rich transmembrane  
"•0.497739655•0.247544704•fibronectin leucine rich transmembrane protein  
2•FLRT2•Hs.533710•ENSG00000185070•7155 // cell adhesion // inferred from  
electronic annotation•5578 // extracellular matrix (sensu Metazoa) //  
non-traceable author statement /// 5887 // integral to plasma membrane //  
non-traceable author statement•"5057 // receptor signaling protein activity  
// non-traceable author statement /// 30674 // protein binding, bridging //  
non-traceable author statement"  
208936\_x\_at•"gb:AF074000.1 /DB\_XREF=gi:5577965 /FEA=FLmRNA /CNT=266  
/TID=Hs.4082.0 /TIER=FL /STK=0 /UG=Hs.4082 /LL=3964 /UG\_GENE=LGALS8 /DEF=Homo  
sapiens Po66 carbohydrate binding protein mRNA, complete cds. /PROD=Po66  
carbohydrate binding protein /FL=gb:AF074000.1  
gb"•0.497445045•0.470824799•"lectin, galactoside-binding, soluble, 8  
(galectin 8)"•LGALS8•Hs.4082•ENSG00000116977••5615 // extracellular space //  
traceable author statement•5529 // sugar binding // inferred from electronic  
annotation /// 5529 // sugar binding // traceable author statement  
227487\_s\_at•"gb:AI359165 /DB\_XREF=gi:4110786 /DB\_XREF=qy26d12.x1  
/CLONE=IMAGE:2013143 /FEA=EST /CNT=33 /TID=Hs.21858.1 /TIER=Stack /STK=21  
/UG=Hs.21858 /LL=10292 /UG\_GENE=TNRC3 /UG\_TITLE=trinucleotide repeat  
containing 3•0.496088147•0.337904897••••••••  
204491\_at•"gb:R40917 /DB\_XREF=gi:823119 /DB\_XREF=yf75d09.s1  
/CLONE=IMAGE:28220 /FEA=FLmRNA /CNT=58 /TID=Hs.172081.0 /TIER=Stack /STK=8  
/UG=Hs.172081 /LL=5144 /UG\_GENE=PDE4D /UG\_TITLE=phosphodiesterase 4D,  
cAMP-specific (dunce (Drosophila)-homolog phosphodiesterase  
E"•0.495878127•0.20918572•"Phosphodiesterase 4D, cAMP-specific  
(phosphodiesterase E3 dunce homolog,  
Drosophila)"•PDE4D•Hs.117545•ENSG00000113448•7165 // signal transduction //  
inferred from electronic annotation /// 9187 // cyclic nucleotide metabolism  
// inferred from sequence or structural similarity•5625 // soluble fraction  
// traceable author statement /// 5626 // insoluble fraction // traceable  
author statement•"4114 // 3',5'-cyclic-nucleotide phosphodiesterase activity  
// non-traceable author statement /// 4115 // cAMP-specific phosphodiesterase  
activity // traceable author statement /// 16787 // hydrolase activity //  
inferred from electronic annotation"  
209763\_at•"gb:AL049176 /DB\_XREF=gi:4808226 /FEA=FLmRNA /CNT=84 /TID=Hs.82223.0  
/TIER=Stack /STK=46 /UG=Hs.82223 /LL=57803 /UG\_GENE=LOC57803  
/UG\_TITLE=chordin-like /DEF=Human DNA sequence from clone 141H5 on chromosome  
Xq22.1-23. Contains parts of a novel Chordin  
LIK•0.495190031•0.353425976•chordin-like  
1•CHRDL1•Hs.496587•ENSG00000101938•7275 // development // inferred from  
electronic annotation••  
223633\_s\_at•"gb:BC005081.1 /DB\_XREF=gi:13477230 /FEA=FLmRNA /CNT=42  
/TID=Hs.158515.0 /TIER=FL /STK=2 /UG=Hs.158515 /DEF=Homo sapiens, clone  
MGC:13038, mRNA, complete cds. /PROD=Unknown (protein for MGC:13038)  
/FL=gb:BC005081.1"•0.494656489•0.486576549•brevican•BCAN•Hs.516904•ENSG0000013  
2692•7155 // cell adhesion // inferred from electronic annotation•16020 //  
membrane // inferred from electronic annotation•5529 // sugar binding //  
inferred from electronic annotation /// 5540 // hyaluronic acid binding //  
inferred from electronic annotation  
226748\_at•"gb:AI674731 /DB\_XREF=gi:4875211 /DB\_XREF=wd19g07.x1  
/CLONE=IMAGE:2328636 /FEA=EST /CNT=44 /TID=Hs.293658.0 /TIER=Stack /STK=21  
/UG=Hs.293658 /UG\_TITLE=ESTs•0.493731763•0.466308805•hypothetical protein  
MGC35274•MGC35274•Hs.134045•ENSG00000140280•16998 // cell wall catabolism //  
inferred from electronic annotation••  
209102\_s\_at•"gb:AF019214.1 /DB\_XREF=gi:2460168 /FEA=FLmRNA /CNT=179  
/TID=Hs.10882.1 /TIER=FL+Stack /STK=98 /UG=Hs.10882 /LL=26959 /UG\_GENE=HBP1  
/DEF=Homo sapiens HMG box containing protein 1 mRNA, complete cds. /PROD=HMG  
box containing protein 1 /FL=gb:AF019214.1"•0.491287807•0.399539028•HMG-box  
transcription factor 1•HBP1•Hs.162032•ENSG00000105856•"6355 // regulation of  
transcription, DNA-dependent // inferred from electronic annotation"•5634 //  
nucleus // inferred from electronic annotation•3677 // DNA binding //  
inferred from electronic annotation  
219090\_at•"gb:NM\_020689.2 /DB\_XREF=gi:10518346 /GEN=NCKX3 /FEA=FLmRNA /CNT=81  
/TID=Hs.12321.0 /TIER=FL+Stack /STK=21 /UG=Hs.12321 /LL=57419 /DEF=Homo  
sapiens sodium calcium exchanger (NCKX3), mRNA. /PROD=sodium calcium  
exchanger /FL=gb:AF169257.2 gb:NM\_020689.2"•0.490291045•0.187346281•"solute  
carrier family 24 (sodium/potassium/calcium exchanger), member  
3"•SLC24A3•Hs.211252•ENSG00000185052•6811 // ion transport // inferred from  
electronic annotation /// 6813 // potassium ion transport // inferred from  
electronic annotation /// 6814 // sodium ion transport // inferred from  
electronic annotation /// 6816 // calcium ion transport // inferred f•16021

// integral to membrane // inferred from electronic annotation•15293 //  
symporter activity // inferred from electronic annotation /// 15297 //  
antiporter activity // inferred from electronic annotation  
205364\_at•"gb:NM\_003500.1 /DB\_XREF=gi:4501868 /GEN=ACOX2 /FEA=FLmRNA /CNT=47  
/TID=Hs.9795.0 /TIER=FL+Stack /STK=26 /UG=Hs.9795 /LL=8309 /DEF=Homo sapiens  
acyl-Coenzyme A oxidase 2, branched chain (ACOX2), mRNA. /PROD=acyl-Coenzyme  
A oxidase 2, branched chain /FL=gb:"•0.489066396•0.298773856•"acyl-Coenzyme A  
oxidase 2, branched chain"•ACOX2•Hs.444959•ENSG00000168306•6118 // electron  
transport // inferred from electronic annotation /// 6629 // lipid metabolism  
// inferred from electronic annotation /// 6631 // fatty acid metabolism //  
inferred from electronic annotation /// 6635 // fatty acid beta-oxidation //  
inferred from electronic annotation /// 6635 // fatty acid beta-oxidation //  
inferre•5777 // peroxisome // non-traceable author statement•3995 // acyl-CoA  
dehydrogenase activity // inferred from electronic annotation /// 3997 //  
acyl-CoA oxidase activity // traceable author statement /// 16491 //  
oxidoreductase activity // inferred from electronic annotation  
206761\_at•"gb:NM\_005816.1 /DB\_XREF=gi:5032140 /GEN=TACTILE /FEA=FLmRNA /CNT=9  
/TID=Hs.142023.0 /TIER=FL /STK=1 /UG=Hs.142023 /LL=10225 /DEF=Homo sapiens T  
cell activation, increased late expression (TACTILE), mRNA. /PROD=T cell  
activation, increased late expression "•0.487977518•0.354348581•CD96  
antigen•CD96•Hs.142023•ENSG00000153283•6955 // immune response // traceable  
author statement /// 7155 // cell adhesion // traceable author statement•5886  
// plasma membrane // traceable author statement /// 5887 // integral to  
plasma membrane // traceable author statement•  
222269\_at•"gb:W87634 /DB\_XREF=gi:1401698 /DB\_XREF=zh67b09.s1  
/CLONE=IMAGE:417113 /FEA=EST /CNT=19 /TID=Hs.17947.0 /TIER=ConsEnd /STK=4  
/UG=Hs.17947 /UG\_TITLE=ESTs, Weakly similar to K02F3.10  
(C.elegans)"•0.487814463•0.386487221•chromosome X open reading frame  
33•CXorf33•Hs.512181•ENSG00000155008•••  
218706\_s\_at•gb:AW575493 /DB\_XREF=gi:7247032  
/DB\_XREF=UI-HF-BM0-adp-a-04-0-UI.s1 /CLONE=IMAGE:3062287 /FEA=FLmRNA /CNT=96  
/TID=Hs.235445.0 /TIER=Stack /STK=19 /UG=Hs.235445 /LL=65983  
/UG\_GENE=FLJ21313 /UG\_TITLE=hypothetical protein FLJ21313  
/FL=gb:NM\_023927.1•0.487267562•0.258522569•HCV NS3-transactivated protein  
2•NS3TP2•Hs.363558•ENSG00000155324•••  
231535\_x\_at•gb:AI340264 /DB\_XREF=gi:4077191 /DB\_XREF=qx86d02.x1  
/CLONE=IMAGE:2009379 /FEA=EST /CNT=9 /TID=Hs.194093.2 /TIER=Stack /STK=9  
/UG=Hs.194093 /LL=54763 /UG\_GENE=DKFZp434B1222 /UG\_TITLE=AKAP-binding sperm  
protein ropporin•0.487173212•0.240528417•"ropporin, rhophilin associated  
protein 1"•ROPN1•Hs.458304•ENSG00000065371•7165 // signal transduction //  
inferred from electronic annotation•16021 // integral to membrane // inferred  
from electronic annotation /// 19867 // outer membrane // inferred from  
electronic annotation•8603 // cAMP-dependent protein kinase regulator  
activity // inferred from electronic annotation /// 15288 // porin activity  
// inferred from electronic annotation  
213537\_at•gb:AI128225 /DB\_XREF=gi:3596739 /DB\_XREF=qc33e05.x1  
/CLONE=IMAGE:1711424 /FEA=EST /CNT=30 /TID=Hs.914.1 /TIER=Stack /STK=16  
/UG=Hs.914 /UG\_TITLE=Human mRNA for SB classII histocompatibility antigen  
alpha-chain•0.487110537•0.484878743•"major histocompatibility complex, class  
II, DP alpha 1"•HLA-DPA1•Hs.347270•ENSG00000168384•"6955 // immune response  
// non-traceable author statement /// 19884 // antigen presentation,  
exogenous antigen // inferred from electronic annotation /// 19886 // antigen  
processing, exogenous antigen via MHC class II // inferred from electronic  
annotatio"•5887 // integral to plasma membrane // non-traceable author  
statement /// 16020 // membrane // inferred from electronic annotation•45012  
// MHC class II receptor activity // non-traceable author statement  
201005\_at•"gb:NM\_001769.1 /DB\_XREF=gi:4502692 /GEN=CD9 /FEA=FLmRNA /CNT=342  
/TID=Hs.1244.0 /TIER=FL+Stack /STK=126 /UG=Hs.1244 /LL=928 /DEF=Homo sapiens  
CD9 antigen (p24) (CD9), mRNA. /PROD=CD9 antigen (p24) /FL=gb:NM\_001769.1  
gb:L34068.1 gb:M38690.1"•0.485742804•0.473187647•CD9 antigen  
(p24)•CD9•Hs.114286•ENSG0000010278•6928 // cell motility // inferred from  
direct assay /// 7155 // cell adhesion // inferred from direct assay /// 7342  
// fusion of sperm to egg plasma membrane // inferred from direct assay ///  
30168 // platelet activation // non-traceable author statement•5886 // plasma  
membrane // non-traceable author statement /// 5887 // integral to plasma  
membrane // non-traceable author statement•5515 // protein binding //  
inferred from physical interaction  
222424\_s\_at•"gb:BC000805.1 /DB\_XREF=gi:12654010 /FEA=FLmRNA /CNT=190  
/TID=Hs.118064.0 /TIER=FL /STK=0 /UG=Hs.118064 /LL=64710 /UG\_GENE=NUCKS  
/DEF=Homo sapiens, similar to rat nuclear ubiquitous casein kinase 2, clone  
MGC:5494, mRNA, complete cds. /PROD=similar to rat  
"•0.484294177•0.371697343•nuclear ubiquitous casein kinase and  
cyclin-dependent kinase substrate•NUCKS•Hs.213061•ENSG00000069275••5634 //  
nucleus // inferred from electronic annotation•  
229232\_at•"gb:AW135740 /DB\_XREF=gi:6139873 /DB\_XREF=UI-H-BI1-acf-a-08-0-UI.s1  
/CLONE=IMAGE:2714007 /FEA=EST /CNT=16 /TID=Hs.194071.0 /TIER=Stack /STK=10  
/UG=Hs.194071 /UG\_TITLE=ESTs, Weakly similar to unnamed protein product  
(H.sapiens)"•0.483490329•0.441512199•hypothetical protein  
FLJ36812•FLJ36812•Hs.234681•ENSG00000180979•••  
216942\_s\_at•"gb:D28586.1 /DB\_XREF=gi:466540 /FEA=mRNA /CNT=1 /TID=Hs.75626.2  
/TIER=ConsEnd /STK=0 /UG=Hs.75626 /LL=965 /UG\_GENE=CD58 /DEF=Human mRNA for  
LFA-3(delta D2), partial cds. /PROD=LFA-3(delta

D2)"\*0.482670273\*0.387967681\*"CD58 antigen, (lymphocyte function-associated antigen 3)"\*CD58\*Hs.34341\*ENSG00000116815\*16337 // cell-cell adhesion // non-traceable author statement /// 19735 // antimicrobial humoral response (sensu Vertebrata) // not recorded\*5624 // membrane fraction // not recorded /// 5887 // integral to plasma membrane // non-traceable author statement /// 16020 // membrane // inferred from electronic annotation\*5515 // protein binding // inferred from physical interaction  
232238\_at\*"gb:AK001380.1 /DB\_XREF=gi:7022604 /FEA=mRNA /CNT=10 /TID=Hs.145479.0 /TIER=ConsEnd /STK=3 /UG=Hs.145479 /UG\_TITLE=Homo sapiens cDNA FLJ10518 fis, clone NT2RP2000814 /DEF=Homo sapiens cDNA FLJ10518 fis, clone NT2RP2000814."\*0.480444757\*0.439701825\*"asp (abnormal spindle)-like, microcephaly associated (Drosophila)"\*ASPM\*Hs.121028\*ENSG00000066279\*910 // cytokinesis // inferred from electronic annotation /// 7049 // cell cycle // inferred from electronic annotation /// 7067 // mitosis // inferred from electronic annotation\*5634 // nucleus // inferred from electronic annotation\*5516 // calmodulin binding // inferred from electronic annotation  
211990\_at\*"gb:M27487.1 /DB\_XREF=gi:703088 /GEN=HLA-DPA1 /FEA=FLmRNA /CNT=358 /TID=Hs.914.0 /TIER=FL+Stack /STK=139 /UG=Hs.914 /DEF=Homo sapiens MHC class II DPw3-alpha-1 chain mRNA, complete cds. /PROD=MHC class II DP3-alpha /FL=gb:M27487.1"\*0.480131624\*0.401457362\*"major histocompatibility complex, class II, DP alpha 1"\*HLA-DPA1\*Hs.347270\*ENSG00000168384\*"6955 // immune response // non-traceable author statement /// 19884 // antigen presentation, exogenous antigen // inferred from electronic annotation /// 19886 // antigen processing, exogenous antigen via MHC class II // inferred from electronic annotation\*5887 // integral to plasma membrane // non-traceable author statement /// 16020 // membrane // inferred from electronic annotation\*45012 // MHC class II receptor activity // non-traceable author statement  
202191\_s\_at\*"gb:BE439987 /DB\_XREF=gi:9439470 /DB\_XREF=HTM1-745F /FEA=FLmRNA /CNT=244 /TID=Hs.226133.0 /TIER=Stack /STK=21 /UG=Hs.226133 /LL=8522 /UG\_GENE=GAS7 /UG\_TITLE=growth arrest-specific 7 /FL=gb:AB007854.1 gb:NM\_005890.1\*0.478524055\*0.472600783\*growth arrest-specific 7\*GAS7\*Hs.462214\*ENSG00000007237\*7050 // cell cycle arrest // traceable author statement /// 7399 // neurogenesis // inferred from electronic annotation /// 30154 // cell differentiation // inferred from electronic annotation\*3700 // transcription factor activity // traceable author statement  
201310\_s\_at\*"gb:NM\_004772.1 /DB\_XREF=gi:4758865 /GEN=P311 /FEA=FLmRNA /CNT=470 /TID=Hs.142827.0 /TIER=FL+Stack /STK=195 /UG=Hs.142827 /LL=9315 /DEF=Homo sapiens P311 protein (P311), mRNA. /PROD=P311 protein /FL=gb:U30521.1 gb:NM\_004772.1  
gb:U36189.1"\*0.478126845\*0.344337108\*chromosome 5 open reading frame 13\*C5orf13\*Hs.483067\*ENSG00000134986\*\*\*  
206701\_x\_at\*"gb:NM\_003991.1 /DB\_XREF=gi:4503466 /GEN=EDNRB /FEA=FLmRNA /CNT=11 /TID=Hs.82002.1 /TIER=FL /STK=0 /UG=Hs.82002 /LL=1910 /DEF=Homo sapiens endothelin receptor type B (EDNRB), transcript variant 2, mRNA. /PROD=endothelin receptor type B isoform 2 /FL=gb:NM\_\*0.478053423\*0.391106406\*endothelin receptor type B\*EDNRB\*Hs.82002\*ENSG00000136160\*"7194 // negative regulation of adenylate cyclase activity // traceable author statement /// 7200 // G-protein signaling, coupled to IP3 second messenger (phospholipase C activating) // traceable author statement /// 7399 // neurogenesis // traceable autho"\*5886 // plasma membrane // traceable author statement /// 5887 // integral to plasma membrane // traceable author statement\*1584 // rhodopsin-like receptor activity // inferred from electronic annotation /// 4872 // receptor activity // inferred from electronic annotation /// 4962 // endothelin receptor activity // traceable author statement  
206560\_s\_at\*"gb:NM\_006533.1 /DB\_XREF=gi:5729924 /GEN=MIA /FEA=FLmRNA /CNT=15 /TID=Hs.279651.0 /TIER=FL /STK=5 /UG=Hs.279651 /LL=8190 /DEF=Homo sapiens melanoma inhibitory activity (MIA), mRNA. /PROD=melanoma inhibitory activity /FL=gb:NM\_006533.1"\*0.477749735\*0.438956087\*melanoma inhibitory activity\*MIA\*Hs.279651\*ENSG00000187570\*8283 // cell proliferation // traceable author statement\*5615 // extracellular space // traceable author statement\*8083 // growth factor activity // inferred from electronic annotation  
211744\_s\_at\*"gb:BC005930.1 /DB\_XREF=gi:13543544 /FEA=FLmRNA /CNT=1 /TID=HsAffx.900771.975 /TIER=FL /STK=0 /DEF=Homo sapiens, Similar to CD58 antigen, (lymphocyte function-associated antigen 3), clone MGC:14538, mRNA, complete cds. /PROD=Similar to CD58 antigen, (lymph"\*0.477654281\*0.425737464\*"CD58 antigen, (lymphocyte function-associated antigen 3) /// CD58 antigen, (lymphocyte function-associated antigen 3)"\*CD58\*Hs.34341\*ENSG00000116815\*16337 // cell-cell adhesion // non-traceable author statement /// 19735 // antimicrobial humoral response (sensu Vertebrata) // not recorded\*5624 // membrane fraction // not recorded /// 5887 // integral to plasma membrane // non-traceable author statement /// 16020 // membrane // inferred from electronic annotation\*5515 // protein binding // inferred from physical interaction  
221752\_at\*"gb:AL041728 /DB\_XREF=gi:5421076 /DB\_XREF=DKFZp43400717\_s1 /CLONE=DKFZp43400717 /FEA=mRNA /CNT=143 /TID=Hs.60377.0 /TIER=Stack /STK=42 /UG=Hs.60377 /LL=54434 /UG\_GENE=KIAA1298 /UG\_TITLE=KIAA1298 protein\*0.477617619\*0.448588433\*"Homo sapiens, clone IMAGE:3832417,

mRNA"••Hs.199763•••••  
204457\_s\_at•"gb:NM\_002048.1 /DB\_XREF=gi:4503918 /GEN=GAS1 /FEA=FLmRNA /CNT=82  
/TID=Hs.65029.0 /TIER=FL+Stack /STK=22 /UG=Hs.65029 /LL=2619 /DEF=Homo  
sapiens growth arrest-specific 1 (GAS1), mRNA. /PROD=growth arrest-specific 1  
/FL=gb:NM\_002048.1 gb:L13698.1"•0.477348608•0.299755966•growth  
arrest-specific 1•GAS1•Hs.65029•ENSG00000180447•7049 // cell cycle //  
inferred from electronic annotation /// 7050 // cell cycle arrest //  
traceable author statement /// 8285 // negative regulation of cell  
proliferation // traceable author statement /// 45749 // negative regulation  
of S phase of mitoti•16020 // membrane // inferred from electronic annotation  
/// 46658 // anchored to plasma membrane // inferred from sequence or  
structural similarity•  
215253\_s\_at•gb:AL049369.1 /DB\_XREF=gi:4500160 /FEA=mRNA /CNT=5  
/TID=Hs.250724.0 /TIER=ConsEnd /STK=0 /UG=Hs.250724 /UG\_TITLE=Homo sapiens  
mRNA; cDNA DKFZp586D0518 (from clone DKFZp586D0518) /DEF=Homo sapiens mRNA;  
cDNA DKFZp586D0518 (from clone DKFZp586D0518).•0.476932594•0.340893874•Down  
syndrome critical region gene 1•DSCR1•Hs.282326•ENSG00000159200•7165 //  
signal transduction // traceable author statement /// 7417 // central nervous  
system development // traceable author statement /// 8015 // circulation //  
traceable author statement /// 19722 // calcium-mediated signaling //  
inferred from electroni•5634 // nucleus // traceable author statement•3700 //  
transcription factor activity // traceable author statement  
221558\_s\_at•"gb:AF288571.1 /DB\_XREF=gi:9858157 /GEN=LEF1 /FEA=FLmRNA /CNT=138  
/TID=Hs.44865.1 /TIER=FL /STK=0 /UG=Hs.44865 /LL=51176 /DEF=Homo sapiens  
lymphoid enhancer factor-1 (LEF1) mRNA, complete cds. /PROD=lymphoid enhancer  
factor-1 /FL=gb:AF288571.1 gb:NM\_016269"•0.476700799•0.365278954•lymphoid  
enhancer-binding factor 1•LEF1•Hs.125132•ENSG00000138795"•6350 //  
transcription // inferred from electronic annotation /// 6355 // regulation  
of transcription, DNA-dependent // inferred from electronic annotation ///  
16055 // Wnt receptor signaling pathway // inferred from electronic  
annotation"•5634 // nucleus // inferred from electronic annotation•3700 //  
transcription factor activity // inferred from electronic annotation  
224990\_at•"gb:BE972723 /DB\_XREF=gi:10586059 /DB\_XREF=601652143F1  
/CLONE=IMAGE:3935242 /FEA=mRNA /CNT=118 /TID=Hs.122489.0 /TIER=Stack /STK=14  
/UG=Hs.122489 /UG\_TITLE=Homo sapiens cDNA FLJ13289 fis, clone  
OVARC1001170"•0.476425678•0.388754667•hypothetical protein  
LOC201895•LOC201895•Hs.205952•ENSG00000163683•••  
230532\_at•gb:BF001685 /DB\_XREF=gi:10701960 /DB\_XREF=7g91g02.x1  
/CLONE=IMAGE:3313874 /FEA=EST /CNT=9 /TID=Hs.99736.0 /TIER=Stack /STK=8  
/UG=Hs.99736 /UG\_TITLE=ESTs•0.47608068•0.466317611•chromosome X open reading  
frame 38•CXorf38•Hs.495961•ENSG00000185753•••  
225612\_s\_at•gb:BE672260 /DB\_XREF=gi:10032801 /DB\_XREF=7d27a05.x1  
/CLONE=IMAGE:3248432 /FEA=EST /CNT=63 /TID=Hs.101799.0 /TIER=Stack /STK=22  
/UG=Hs.101799 /LL=54532 /UG\_GENE=KIAA1350 /UG\_TITLE=KIAA1350  
protein•0.474927108•0.405075622"•UDP-GlcNAc:betaGal  
beta-1,3-N-acetylglucosaminyltransferase  
5"•B3GNT5•Hs.208267•ENSG00000176597•6486 // protein amino acid glycosylation  
// traceable author statement /// 7417 // central nervous system development  
// inferred from direct assay /// 9247 // glycolipid biosynthesis //  
traceable author statement•5622 // intracellular // inferred from direct  
assay /// 16020 // membrane // inferred from electronic annotation"•8378 //  
galactosyltransferase activity // inferred from electronic annotation ///  
8457 // beta-galactosyl-N-acetylglucosaminylgalactosylglucosyl-ceramide  
beta-1,3-acetylglucosaminyltransferase activity // inferred from direct assay  
/// 16757 // transferas"  
226034\_at•"gb:BE222344 /DB\_XREF=gi:8909662 /DB\_XREF=hul10g08.x1  
/CLONE=IMAGE:3166238 /FEA=EST /CNT=70 /TID=Hs.166975.4 /TIER=Stack /STK=24  
/UG=Hs.166975 /LL=6430 /UG\_GENE=SFRR5 /UG\_TITLE=splicing factor,  
arginineserine-rich 5"•0.474647699•0.428456355"•Homo sapiens, clone  
IMAGE:3881549, mRNA"••Hs.346735•••••  
214608\_s\_at•gb:AJ000098.1 /DB\_XREF=gi:3928169 /GEN=EYA1C /FEA=FLmRNA /CNT=16  
/TID=Hs.94210.0 /TIER=ConsEnd /STK=7 /UG=Hs.94210 /LL=2138 /UG\_TITLE=eyes  
absent (Drosophila) homolog 1 /DEF=Homo sapiens mRNA for EYA1C gene.  
/FL=gb:NM\_000503.1•0.471886076•0.282595378•eyes absent homolog 1  
(Drosophila)•EYA1•Hs.491997•ENSG00000104313"•6350 // transcription //  
inferred from electronic annotation /// 6355 // regulation of transcription,  
DNA-dependent // inferred from electronic annotation /// 7275 // development  
// inferred from electronic annotation /// 7605 // perception of sound //  
tr"•5634 // nucleus // inferred from electronic annotation•287 // magnesium  
ion binding // inferred from electronic annotation /// 4721 // phosphoprotein  
phosphatase activity // inferred from electronic annotation /// 4725 //  
protein tyrosine phosphatase activity // inferred from electronic annotation  
/// 16787 //  
212314\_at•"gb:AB018289.1 /DB\_XREF=gi:3882212 /GEN=KIAA0746 /FEA=mRNA /CNT=199  
/TID=Hs.49500.0 /TIER=Stack /STK=73 /UG=Hs.49500 /LL=23231 /DEF=Homo sapiens  
mRNA for KIAA0746 protein, partial cds. /PROD=KIAA0746  
protein"•0.469871615•0.48806017•KIAA0746  
protein•KIAA0746•Hs.479384•ENSG00000091490•••5488 // binding // inferred from  
electronic annotation  
226353\_at•gb:AI674647 /DB\_XREF=gi:4875127 /DB\_XREF=wd18g05.x1  
/CLONE=IMAGE:2328536 /FEA=mRNA /CNT=55 /TID=Hs.28980.0 /TIER=Stack /STK=19

/UG=Hs.28980 /UG\_TITLE=Homo sapiens clone  
HQ0270•0.46968837•0.419141996•signal peptide peptidase-like  
2A•SPPL2A•Hs.401537•ENSG00000138600•6508 // proteolysis and peptidolysis //  
inferred from electronic annotation•16021 // integral to membrane // inferred  
from electronic annotation•8233 // peptidase activity // inferred from  
electronic annotation /// 8717 // D-alanyl-D-alanine endopeptidase activity  
// inferred from electronic annotation  
222631\_at•gb:AI862887 /DB\_XREF=gi:5526994 /DB\_XREF=tz91e02.x1  
/CLONE=IMAGE:2295962 /FEA=FLmRNA /CNT=97 /TID=Hs.23920.0 /TIER=Stack /STK=30  
/UG=Hs.23920 /LL=55300 /UG\_GENE=FLJ11105 /UG\_TITLE=hypothetical protein  
FLJ11105 /FL=gb:NM\_018323.1•0.468403462•0.49443516•phosphatidylinositol  
4-kinase type-II beta•PI4K2B•Hs.443733•ENSG00000038210•••"16301 // kinase  
activity // inferred from electronic annotation /// 16773 //  
phosphotransferase activity, alcohol group as acceptor // inferred from  
electronic annotation"  
225847\_at•"gb:AB037784.1 /DB\_XREF=gi:7243106 /GEN=KIAA1363 /FEA=mRNA /CNT=76  
/TID=Hs.22941.0 /TIER=Stack /STK=14 /UG=Hs.22941 /LL=57552 /DEF=Homo sapiens  
mRNA for KIAA1363 protein, partial cds. /PROD=KIAA1363  
protein"•0.467970058•0.354005654•arylacetylamine deacetylase-like  
1•AADACL1•Hs.444099•ENSG00000144959•••3824 // catalytic activity // inferred  
from electronic annotation  
221487\_s\_at•"gb:AF157510.1 /DB\_XREF=gi:8886010 /FEA=FLmRNA /CNT=217  
/TID=Hs.111680.1 /TIER=FL /STK=6 /UG=Hs.111680 /LL=2029 /UG\_GENE=ENSA  
/DEF=Homo sapiens beta endosulfine mRNA, complete cds. /PROD=beta endosulfine  
/FL=gb:AF067170.1 gb:AF157510.1"•0.467728248•0.186751804•endosulfine  
alpha•ENSA•Hs.510087•ENSG00000143420•6810 // transport // traceable author  
statement /// 7584 // response to nutrients // traceable author  
statement••5102 // receptor binding // traceable author statement /// 8200 //  
ion channel inhibitor activity // traceable author statement  
228840\_at•gb:AW451115 /DB\_XREF=gi:6991891 /DB\_XREF=UI-H-BI3-alg-g-01-0-UI.s1  
/CLONE=IMAGE:2736936 /FEA=EST /CNT=18 /TID=Hs.101550.0 /TIER=Stack /STK=16  
/UG=Hs.101550 /UG\_TITLE=ESTs•0.46762636•0.360925221•angiomin like  
1•AMOTL1•Hs.503594•ENSG00000166025•••  
229735\_s\_at•gb:W15435 /DB\_XREF=gi:1289816 /DB\_XREF=zc19a07.s1  
/CLONE=IMAGE:322740 /FEA=EST /CNT=14 /TID=Hs.13804.0 /TIER=Stack /STK=10  
/UG=Hs.13804 /LL=57185 /UG\_GENE=DJ462023.2 /UG\_TITLE=hypothetical protein  
dJ462023.2•0.467190984•0.218331319•Hypothetical protein  
dJ462023.2•DJ462023.2•Hs.523442•ENSG00000001461•••  
223125\_s\_at•gb:AL563236 /DB\_XREF=gi:12912430 /DB\_XREF=AL563236  
/CLONE=CS0DD001YG18 (3 prime) /FEA=FLmRNA /CNT=166 /TID=Hs.12532.0  
/TIER=Stack /STK=33 /UG=Hs.12532 /LL=81563 /UG\_GENE=C1ORF21  
/UG\_TITLE=chromosome 1 open reading frame 21  
/FL=gb:AF312864.1•0.467049905•0.409739697•chromosome 1 open reading frame  
21•C1orf21•Hs.132369•ENSG00000116667•••  
210367\_s\_at•"gb:AF010316.1 /DB\_XREF=gi:2415307 /GEN=PIG12 /FEA=FLmRNA /CNT=21  
/TID=Hs.146688.1 /TIER=FL /STK=0 /UG=Hs.146688 /LL=9536 /DEF=Homo sapiens  
Pig12 (PIG12) mRNA, complete cds. /PROD=Pig12  
/FL=gb:AF010316.1"•0.466587336•0.152820105•prostaglandin E  
synthase•PTGES•Hs.146688•ENSG00000148344•6693 // prostaglandin metabolism //  
traceable author statement /// 7165 // signal transduction // non-traceable  
author statement /// 19735 // antimicrobial humoral response (sensu  
Vertebrata) // not recorded•5624 // membrane fraction // traceable author  
statement /// 16021 // integral to membrane // inferred from electronic  
annotation•16853 // isomerase activity // inferred from electronic annotation  
/// 50220 // prostaglandin-E synthase activity // inferred from electronic  
annotation  
218618\_s\_at•"gb:NM\_022763.1 /DB\_XREF=gi:12232434 /GEN=FLJ23399 /FEA=FLmRNA  
/CNT=82 /TID=Hs.299883.0 /TIER=FL /STK=2 /UG=Hs.299883 /LL=64778 /DEF=Homo  
sapiens hypothetical protein FLJ23399 (FLJ23399), mRNA. /PROD=hypothetical  
protein FLJ23399 /FL=gb:NM\_022763.1"•0.463063905•0.450217962•fibronectin type  
III domain containing 3B•FNDC3B•Hs.159430•ENSG00000075420•••  
224965\_at•"gb:AU118419 /DB\_XREF=gi:10933467 /DB\_XREF=AU118419  
/CLONE=HEMBA1003560 /FEA=mRNA /CNT=125 /TID=Hs.289026.1 /TIER=Stack /STK=8  
/UG=Hs.289026 /LL=54331 /UG\_GENE=GNG2 /UG\_TITLE=guanine nucleotide binding  
protein (G protein), gamma 2"•0.46107951•0.290642789•"guanine nucleotide  
binding protein (G protein), gamma 2"•GNG2•Hs.187772•ENSG00000186469•7165 //  
signal transduction // inferred from electronic annotation /// 7186 //  
G-protein coupled receptor protein signaling pathway // inferred from  
electronic annotation•5834 // heterotrimeric G-protein complex // inferred  
from electronic annotation•4871 // signal transducer activity // inferred  
from electronic annotation  
202859\_x\_at•"gb:NM\_000584.1 /DB\_XREF=gi:10834977 /GEN=IL8 /FEA=FLmRNA  
/CNT=368 /TID=Hs.624.0 /TIER=FL+Stack /STK=80 /UG=Hs.624 /LL=3576 /DEF=Homo  
sapiens interleukin 8 (IL8), mRNA. /PROD=interleukin 8 /FL=gb:M17017.1  
gb:M26383.1 gb:NM\_000584.1"•0.460623895•0.46690573•interleukin  
8•IL8•Hs.624•ENSG00000169429•1525 // angiogenesis // traceable author  
statement /// 6928 // cell motility // traceable author statement /// 6935 //  
chemotaxis // traceable author statement /// 7050 // cell cycle arrest //  
inferred from direct assay /// 7186 // G-protein coupled recep•5615 //  
extracellular space // traceable author statement /// 5625 // soluble  
fraction // traceable author statement•5153 // interleukin-8 receptor binding

// inferred from physical interaction /// 5515 // protein binding // inferred from physical interaction /// 8009 // chemokine activity // traceable author statement  
224212\_s\_at\*gb:AF169689.1 /DB\_XREF=gi:9587673 /GEN=PCDH-alpha10 /FEA=FLmRNA /CNT=1 /TID=Hs.247735.1 /TIER=FL /STK=0 /UG=Hs.247735 /LL=56139 /DEF=Homo sapiens protocadherin alpha 10 alternate isoform (PCDH-alpha10) mRNA, complete cds. /PROD=protocadherin alpha 10  
alte\*0.460514063\*0.484640652\*"protocadherin alpha 9 /// protocadherin alpha subfamily C, 2 /// protocadherin alpha subfamily C, 1 /// protocadherin alpha 13 /// protocadherin alpha 12 /// protocadherin alpha 11 /// protocadherin alpha 10 /// protocadherin alpha 8 /// protocadherin alp"\*PCDA9 /// PCDHAC2 /// PCDHAC1 /// PCDHA13 /// PCDHA12 /// PCDHA11 /// PCDHA10 /// PCDHA8 /// PCDHA7 /// PCDHA6 /// PCDHA5 /// PCDHA4 /// PCDHA3 /// PCDHA2 /// PCDHA1\*Hs.199343\*ENSG00000081842\*7155 // cell adhesion // inferred from electronic annotation /// 7156 // homophilic cell adhesion // inferred from electronic annotation /// 7155 // cell adhesion // traceable author statement /// 7399 // neurogenesis // traceable author statement\*16020 // membrane // inferred from electronic annotation /// 16021 // integral to membrane // inferred from electronic annotation /// 5887 // integral to plasma membrane // traceable author statement\*5509 // calcium ion binding // inferred from electronic annotation /// 5515 // protein binding // inferred from electronic annotation  
227176\_at\*gb:AL565362 /DB\_XREF=gi:12916662 /DB\_XREF=AL565362 /CLONE=CS0DF003YB20 (3 prime) /FEA=EST /CNT=32 /TID=Hs.90431.0 /TIER=Stack /STK=13 /UG=Hs.90431 /UG\_TITLE=ESTs\*0.458383734\*0.375322936\*"Solute carrier family 2 (facilitated glucose transporter), member 13"\*SLC2A13\*Hs.524341\*ENSG00000151229\*8643 // carbohydrate transport // inferred from electronic annotation\*16020 // membrane // inferred from electronic annotation /// 16021 // integral to membrane // inferred from electronic annotation\*5215 // transporter activity // inferred from electronic annotation /// 5351 // sugar porter activity // inferred from electronic annotation  
228164\_at\*gb:BE964704 /DB\_XREF=gi:11768297 /DB\_XREF=601658243R1 /CLONE=IMAGE:3885682 /FEA=EST /CNT=24 /TID=Hs.36250.0 /TIER=Stack /STK=14 /UG=Hs.36250 /UG\_TITLE=ESTs\*0.457695909\*0.392633932\*Transcribed locus\*\*Hs.552817\*\*\*\*  
233907\_s\_at\*gb:R81445 /DB\_XREF=gi:858048 /DB\_XREF=yj02d01.r1 /CLONE=IMAGE:147553 /FEA=DNA\_3 /CNT=3 /TID=Hs.21068.3 /TIER=ConsEnd /STK=1 /UG=Hs.21068 /LL=56256 /UG\_GENE=DJ667H12.2 /UG\_TITLE=hypothetical protein\*0.4571934\*0.276744273\*\*\*\*\*  
209539\_at\*"gb:D25304.1 /DB\_XREF=gi:435445 /GEN=KIAA0006 /FEA=FLmRNA /CNT=81 /TID=Hs.79307.0 /TIER=Stack /STK=21 /UG=Hs.79307 /LL=9459 /UG\_TITLE=RacCdc42 guanine exchange factor (GEF) 6 /DEF=Human mRNA for KIAA0006 gene, partial cds. /FL=gb:D13631.1"\*0.457093037\*0.231673061\*Rac/Cdc42 guanine nucleotide exchange factor (GEF) 6\*ARHGEF6\*Hs.522795\*ENSG00000129675\*6915 // apoptosis // non-traceable author statement /// 7254 // JNK cascade // non-traceable author statement\*5622 // intracellular // Unknown\*5089 // Rho guanyl-nucleotide exchange factor activity // non-traceable author statement /// 5096 // GTPase activator activity // non-traceable author statement  
227230\_s\_at\*gb:BE855799 /DB\_XREF=gi:10368049 /DB\_XREF=7g07a07.x1 /CLONE=IMAGE:3305748 /FEA=mRNA /CNT=37 /TID=Hs.205293.0 /TIER=Stack /STK=9 /UG=Hs.205293 /LL=57482 /UG\_GENE=KIAA1211 /UG\_TITLE=KIAA1211 protein\*0.456626231\*0.462494764\*KIAA1211  
protein\*KIAA1211\*Hs.479783\*ENSG00000109265\*\*\*  
203759\_at\*"gb:NM\_006278.1 /DB\_XREF=gi:5454057 /GEN=SIAT4C /FEA=FLmRNA /CNT=83 /TID=Hs.75268.0 /TIER=FL+Stack /STK=36 /UG=Hs.75268 /LL=6484 /DEF=Homo sapiens sialyltransferase 4C (beta-galactosidase alpha-2,3-sialyltransferase) (SIAT4C), mRNA. /PROD=sialyltransferase "0.455676391\*0.451294355\*"ST3 beta-galactoside alpha-2,3-sialyltransferase 4"\*ST3GAL4\*Hs.504251\*ENSG00000110080\*6486 // protein amino acid glycosylation // inferred from electronic annotation\*5794 // Golgi apparatus // inferred from electronic annotation /// 16020 // membrane // inferred from electronic annotation /// 16021 // integral to membrane // inferred from electronic annotation\*"3836 // beta-galactoside alpha-2,3-sialyltransferase activity // traceable author statement /// 16757 // transferase activity, transferring glycosyl groups // inferred from electronic annotation"  
214895\_s\_at\*gb:AU135154 /DB\_XREF=gi:10995693 /DB\_XREF=AU135154 /CLONE=PLACE1001348 /FEA=mRNA /CNT=11 /TID=Hs.172028.1 /TIER=ConsEnd /STK=0 /UG=Hs.172028 /LL=102 /UG\_GENE=ADAM10 /UG\_TITLE=a disintegrin and metalloproteinase domain 10\*0.455292361\*0.459375035\*a disintegrin and metalloproteinase domain 10\*ADAM10\*Hs.172028\*ENSG00000137845\*1701 // embryonic development (sensu Mammalia) // inferred from sequence or structural similarity /// 6468 // protein amino acid phosphorylation // inferred from sequence or structural similarity /// 6913 // nucleocytoplasmic transport // inferred from se\*5634 // nucleus // inferred from sequence or structural similarity /// 5798 // Golgi vesicle // inferred from direct assay /// 5887 // integral to plasma membrane // traceable author statement /// 9986 // cell surface // inferred from direct assay\*4222 // metalloendopeptidase activity // non-traceable author statement /// 5178 // integrin binding // non-traceable author statement /// 5515 // protein binding // inferred from sequence or structural similarity /// 8270 // zinc



ion binding // inferred  
212230\_at•"gb:AV725664 /DB\_XREF=gi:10831279 /DB\_XREF=AV725664 /CLONE=HTCAOD07 /FEA=EST /CNT=335 /TID=Hs.173717.0 /TIER=Stack /STK=123 /UG=Hs.173717 /UG\_TITLE=Homo sapiens phosphatidic acid phosphatase type 2B (PPAP2B), mRNA"•0.45458197•0.388316083•phosphatidic acid phosphatase type 2B•PPAP2B•Hs.405156•ENSG00000162407•6629 // lipid metabolism // non-traceable author statement /// 8354 // germ cell migration // traceable author statement•16020 // membrane // traceable author statement /// 16021 // integral to membrane // inferred from electronic annotation•4721 // phosphoprotein phosphatase activity // traceable author statement /// 8195 // phosphatidate phosphatase activity // inferred from electronic annotation /// 16787 // hydrolase activity // inferred from electronic annotation 1568633\_a\_at•"gb:BC009735.1 /DB\_XREF=gi:22800375 /TID=Hs2.126790.1 /CNT=7 /FEA=mRNA /TIER=ConsEnd /STK=5 /UG=Hs.126790 /UG\_TITLE=Homo sapiens, clone IMAGE:3878708, mRNA /DEF=Homo sapiens, clone IMAGE:3878708, mRNA."•0.45413377•0.168746911•"CDNA clone IMAGE:3878708, partial cds"••Hs.259498••••  
222111\_at•"gb:AU145293 /DB\_XREF=gi:11006814 /DB\_XREF=AU145293 /CLONE=HEMBA1004405 /FEA=mRNA /CNT=40 /TID=Hs.61773.0 /TIER=ConsEnd /STK=2 /UG=Hs.61773 /UG\_TITLE=Homo sapiens cDNA FLJ11648 fis, clone HEMBA1004405"•0.453782866•0.456399574•Hypothetical protein KIAA1164•KIAA1164•Hs.368548••••  
207086\_x\_at•"gb:NM\_001474.1 /DB\_XREF=gi:4503882 /GEN=GAGE4 /FEA=FLmRNA /CNT=6 /TID=Hs.183199.0 /TIER=FL /STK=1 /UG=Hs.183199 /LL=2576 /DEF=Homo sapiens G antigen 4 (GAGE4), mRNA. /PROD=G antigen 4 /FL=gb:U19145.1 gb:NM\_001474.1"•0.452435101•0.382594788•G antigen 2 /// G antigen 4 /// G antigen 5 /// G antigen 6 /// G antigen 7 /// G antigen 7B /// G antigen 8•GAGE2 /// GAGE4 /// GAGE5 /// GAGE6 /// GAGE7 /// GAGE7B /// GAGE8•Hs.278606•ENSG00000068990 /// ENSG00000189064 /// ENSG00000198716•6968 // cellular defense response // traceable author statement••  
204015\_s\_at•"gb:BC002671.1 /DB\_XREF=gi:12803670 /FEA=FLmRNA /CNT=105 /TID=Hs.2359.0 /TIER=FL+Stack /STK=9 /UG=Hs.2359 /LL=1846 /UG\_GENE=DUSP4 /DEF=Homo sapiens, dual specificity phosphatase 4, clone MGC:3713, mRNA, complete cds. /PROD=dual specificity phosphatase 4 /F"•0.450339761•0.480137266•dual specificity phosphatase 4•DUSP4•Hs.417962•ENSG00000120875•74 // regulation of cell cycle // non-traceable author statement /// 165 // MAPKKK cascade // traceable author statement /// 6470 // protein amino acid dephosphorylation // inferred from electronic annotation /// 6470 // protein amino acid dephosphorylati•5634 // nucleus // traceable author statement•4725 // protein tyrosine phosphatase activity // inferred from electronic annotation /// 8330 // protein tyrosine/threonine phosphatase activity // traceable author statement /// 16787 // hydrolase activity // inferred from electronic annotation /// 17017 203854\_at•"gb:NM\_000204.1 /DB\_XREF=gi:4504578 /GEN=IF /FEA=FLmRNA /CNT=232 /TID=Hs.36602.0 /TIER=FL+Stack /STK=47 /UG=Hs.36602 /LL=3426 /DEF=Homo sapiens I factor (complement) (IF), mRNA. /PROD=I factor (complement) /FL=gb:NM\_000204.1 gb:J02770.1"•0.449805411•0.263205608•I factor (complement)•IF•Hs.312485••"6508 // proteolysis and peptidolysis // inferred from electronic annotation /// 6955 // immune response // inferred from electronic annotation /// 6958 // complement activation, classical pathway // inferred from electronic annotation"•5576 // extracellular region // not recorded /// 16020 // membrane // inferred from electronic annotation•3818 // complement factor I activity // traceable author statement /// 4263 // chymotrypsin activity // inferred from electronic annotation /// 4295 // trypsin activity // inferred from electronic annotation /// 5044 // scavenger receptor activity // infe  
227578\_at•gb:H28597 /DB\_XREF=gi:898950 /DB\_XREF=y164e11.s1 /CLONE=IMAGE:163052 /FEA=EST /CNT=32 /TID=Hs.11355.3 /TIER=Stack /STK=10 /UG=Hs.11355 /LL=7112 /UG\_GENE=TMPO /UG\_TITLE=thymopoietin•0.449701374•0.390670884•Thymopoietin•TMPO•Hs.11355•ENSG00000120802••5635 // nuclear membrane // traceable author statement /// 5694 // chromosome // inferred from electronic annotation /// 16021 // integral to membrane // inferred from electronic annotation•3677 // DNA binding // inferred from electronic annotation /// 5521 // lamin binding // traceable author statement  
209184\_s\_at•gb:BF700086 /DB\_XREF=gi:11985494 /DB\_XREF=602127569F1 /CLONE=IMAGE:4284401 /FEA=FLmRNA /CNT=165 /TID=Hs.143648.0 /TIER=Stack /STK=12 /UG=Hs.143648 /LL=8660 /UG\_GENE=IRS2 /UG\_TITLE=insulin receptor substrate 2 /FL=gb:NM\_003749.1 gb:AF073310.1"•0.44941711•0.400164799•insulin receptor substrate 2•IRS2•Hs.442344•ENSG00000185950•6006 // glucose metabolism // traceable author statement /// 7165 // signal transduction // traceable author statement /// 8284 // positive regulation of cell proliferation // not recorded••4871 // signal transducer activity // traceable author statement /// 5158 // insulin receptor binding // inferred from electronic annotation  
225397\_at•"gb:AW575737 /DB\_XREF=gi:7247276 /DB\_XREF=UI-HF-BM0-adv-e-01-0-UI.s1 /CLONE=IMAGE:3062881 /FEA=mRNA /CNT=88 /TID=Hs.324127.0 /TIER=Stack /STK=50 /UG=Hs.324127 /UG\_TITLE=Homo sapiens, clone IMAGE:2823236, mRNA, partial cds"•0.449361867•0.483677388•hypothetical protein MGC20481•MGC20481•Hs.146520•ENSG00000128891•••  
221911\_at•gb:BE881590 /DB\_XREF=gi:10330366 /DB\_XREF=601490008F1

/CLONE=IMAGE:3892465 /FEA=mRNA /CNT=59 /TID=Hs.10684.0 /TIER=Stack /STK=19  
/UG=Hs.10684 /UG\_TITLE=Homo sapiens clone 24421 mRNA  
sequence\*0.447962681\*0.445952887\*ets variant gene 1 /// hypothetical protein  
LOC221810\*ETV1 /// LOC221810\*Hs.22634\*ENSG00000006468\*"6350 // transcription  
// inferred from electronic annotation /// 6355 // regulation of  
transcription, DNA-dependent // inferred from electronic annotation /// 6366  
// transcription from RNA polymerase II promoter // traceable author  
statement\*5634 // nucleus // inferred from electronic annotation\*3700 //  
transcription factor activity // traceable author statement  
203071\_at\*"gb:NM\_004636.1 /DB\_XREF=gi:4759091 /GEN=SEMA3B /FEA=FLmRNA  
/CNT=141 /TID=Hs.82222.0 /TIER=FL+Stack /STK=35 /UG=Hs.82222 /LL=7869  
/DEF=Homo sapiens sema domain, immunoglobulin domain (Ig), short basic  
domain, secreted, (semaphorin) 3B (SEMA3B), mRNA.  
/PROD\*"0.446794639\*0.24784767\*"sema domain, immunoglobulin domain (Ig), short  
basic domain, secreted, (semaphorin) 3B"\*SEMA3B\*Hs.82222\*ENSG00000012171\*7267  
// cell-cell signaling // traceable author statement /// 7275 // development  
// inferred from electronic annotation /// 7411 // axon guidance // traceable  
author statement\*5783 // endoplasmic reticulum // traceable author statement  
/// 16020 // membrane // inferred from electronic annotation /// 16021 //  
integral to membrane // inferred from electronic annotation\*4872 // receptor  
activity // inferred from electronic annotation  
236798\_at\*gb:AW268719 /DB\_XREF=gi:6655749 /DB\_XREF=xv35c04.x1  
/CLONE=IMAGE:2815110 /FEA=EST /CNT=5 /TID=Hs.122113.0 /TIER=ConsEnd /STK=5  
/UG=Hs.122113 /UG\_TITLE=ESTs\*0.445731252\*0.272020108\*"CDNA FLJ32438 fis,  
clone SKMUS2001402"\*Hs.552759\*  
212202\_s\_at\*gb:BG493972 /DB\_XREF=gi:13455486 /DB\_XREF=602542252F1  
/CLONE=IMAGE:4673316 /FEA=mRNA /CNT=222 /TID=Hs.16492.0 /TIER=Stack /STK=38  
/UG=Hs.16492 /LL=25963 /UG\_GENE=DKFZP564G2022 /UG\_TITLE=DKFZP564G2022  
protein\*0.445496874\*0.427154583\*DKFZP564G2022  
protein\*DKFZP564G2022\*Hs.511138\*ENSG00000103978\*16021 // integral to  
membrane // inferred from electronic annotation\*  
217904\_s\_at\*"gb:NM\_012104.1 /DB\_XREF=gi:6912265 /GEN=BACE /FEA=FLmRNA  
/CNT=280 /TID=Hs.49349.0 /TIER=FL /STK=1 /UG=Hs.49349 /LL=23621 /DEF=Homo  
sapiens beta-site APP-cleaving enzyme (BACE), mRNA. /PROD=beta-site  
APP-cleaving enzyme /FL=gb:AF200343.1 gb:AF204943.1  
gb:A\*"0.445463166\*0.284151707\*beta-site APP-cleaving enzyme  
1\*BACE1\*Hs.504003\*ENSG00000186318\*6508 // proteolysis and peptidolysis //  
inferred from electronic annotation /// 6509 // membrane protein ectodomain  
proteolysis // inferred from sequence or structural similarity /// 6509 //  
membrane protein ectodomain proteolysis // traceable author stat\*5768 //  
endosome // inferred from direct assay /// 5768 // endosome // inferred from  
sequence or structural similarity /// 5794 // Golgi apparatus // inferred  
from direct assay /// 5794 // Golgi apparatus // inferred from sequence or  
structural similarity\*4194 // pepsin A activity // inferred from electronic  
annotation /// 8233 // peptidase activity // inferred from electronic  
annotation /// 8798 // beta-aspartyl-peptidase activity // traceable author  
statement /// 9049 // aspartic-type signal peptidase ac  
204806\_x\_at\*"gb:NM\_018950.1 /DB\_XREF=gi:9665231 /GEN=HLA-F /FEA=FLmRNA  
/CNT=39 /TID=Hs.110309.0 /TIER=FL /STK=0 /UG=Hs.110309 /LL=3134 /DEF=Homo  
sapiens major histocompatibility complex, class I, F (HLA-F), mRNA.  
/PROD=major histocompatibility complex, class I, F  
/FL="\*0.445240623\*0.400234262\*"major histocompatibility complex, class I,  
F"\*HLA-F\*Hs.519972\*ENSG00000137403\*"19883 // antigen presentation, endogenous  
antigen // inferred from electronic annotation /// 19885 // antigen  
processing, endogenous antigen via MHC class I // inferred from electronic  
annotation\*16021 // integral to membrane // inferred from electronic  
annotation /// 42612 // MHC class I protein complex // inferred from  
electronic annotation\*30106 // MHC class I receptor activity // traceable  
author statement  
200706\_s\_at\*"gb:NM\_004862.1 /DB\_XREF=gi:4758913 /GEN=PIG7 /FEA=FLmRNA  
/CNT=435 /TID=Hs.76507.0 /TIER=FL+Stack /STK=72 /UG=Hs.76507 /LL=9516  
/DEF=Homo sapiens LPS-induced TNF-alpha factor (PIG7), mRNA.  
/PROD=LPS-induced TNF-alpha factor /FL=gb:AF010312.1 gb:U77396.1  
gb\*"0.443656488\*0.454063954\*lipopolysaccharide-induced TNF  
factor\*LITAF\*Hs.459940\*6350 // transcription // inferred from electronic  
annotation /// 6357 // regulation of transcription from RNA polymerase II  
promoter // traceable author statement /// 43123 // positive regulation of  
I-kappaB kinase/NF-kappaB cascade // inferred from mutan\*5634 // nucleus //  
inferred from electronic annotation\*3702 // RNA polymerase II transcription  
factor activity // traceable author statement /// 4871 // signal transducer  
activity // inferred from mutant phenotype  
213029\_at\*gb:BG478428 /DB\_XREF=gi:13410807 /DB\_XREF=602523839F1  
/CLONE=IMAGE:4642353 /FEA=mRNA /CNT=97 /TID=Hs.326416.0 /TIER=Stack /STK=53  
/UG=Hs.326416 /UG\_TITLE=Homo sapiens mRNA; cDNA DKFZp564H1916 (from clone  
DKFZp564H1916)\*0.442939501\*0.335978234\*Nuclear factor  
I/B\*NFIB\*Hs.370359\*ENSG00000147862\*"6260 // DNA replication // inferred from  
electronic annotation /// 6350 // transcription // inferred from electronic  
annotation /// 6355 // regulation of transcription, DNA-dependent // inferred  
from electronic annotation\*5634 // nucleus // inferred from electronic  
annotation /// 5634 // nucleus // traceable author statement\*3700 //  
transcription factor activity // inferred from electronic annotation /// 3700

// transcription factor activity // traceable author statement  
201826\_s\_at•"gb:NM\_016002.1 /DB\_XREF=gi:7705766 /GEN=LOC51097 /FEA=FLmRNA  
/CNT=244 /TID=Hs.238126.0 /TIER=FL+Stack /STK=10 /UG=Hs.238126 /LL=51097  
/DEF=Homo sapiens CGI-49 protein (LOC51097), mRNA. /PROD=CGI-49 protein  
/FL=gb:NM\_016002.1 gb:AF151807.1"•0.442750904•0.371922564•CGI-49  
protein•CGI-49•Hs.498397•ENSG00000143653•••  
223384\_s\_at•"gb:BE501464 /DB\_XREF=gi:9703872 /DB\_XREF=hw32d01.x1  
/CLONE=IMAGE:3184609 /FEA=FLmRNA /CNT=51 /TID=Hs.65736.0 /TIER=Stack /STK=8  
/UG=Hs.65736 /UG\_TITLE=Homo sapiens tripartite motif protein TRIM4 isoform  
beta (TRIM4) mRNA, complete cds; alternatively  
splic"•0.442118801•0.394898608•tripartite motif-containing  
4•TRIM4•Hs.50749•ENSG00000146833•16567 // protein ubiquitination // inferred  
from electronic annotation•151 // ubiquitin ligase complex // inferred from  
electronic annotation•4842 // ubiquitin-protein ligase activity // inferred  
from electronic annotation /// 8270 // zinc ion binding // inferred from  
electronic annotation  
235199\_at•gb:AI969697 /DB\_XREF=gi:5766515 /DB\_XREF=wz70e09.x1  
/CLONE=IMAGE:2563432 /FEA=EST /CNT=15 /TID=Hs.276860.0 /TIER=ConsEnd /STK=0  
/UG=Hs.276860 /UG\_TITLE=ESTs•0.440427072•0.377102724•"Transcribed locus,  
weakly similar to XP\_513408.1 similar to origin recognition complex, subunit  
1; origin recognition complex, subunit 1, S. cerevisiae, homolog-like; origin  
recognition complex 1; replication control protein 1; origin recognition  
complex,"••Hs.276860••••  
221486\_at•"gb:AF067170.1 /DB\_XREF=gi:4894373 /FEA=FLmRNA /CNT=217  
/TID=Hs.111680.1 /TIER=FL+Stack /STK=50 /UG=Hs.111680 /LL=2029 /UG\_GENE=ENSA  
/DEF=Homo sapiens alpha endosulfine mRNA, complete cds. /PROD=alpha  
endosulfine /FL=gb:AF067170.1  
gb:AF157510.1"•0.439724451•0.45448301•endosulfine  
alpha•ENSA•Hs.510087•ENSG00000143420•6810 // transport // traceable author  
statement /// 7584 // response to nutrients // traceable author  
statement••5102 // receptor binding // traceable author statement /// 8200 //  
ion channel inhibitor activity // traceable author statement  
239719\_at•gb:BF978262 /DB\_XREF=gi:12345477 /DB\_XREF=602148220F1  
/CLONE=IMAGE:4306996 /FEA=EST /CNT=7 /TID=Hs.134182.0 /TIER=ConsEnd /STK=3  
/UG=Hs.134182 /UG\_TITLE=ESTs•0.438485968•0.463478221•CD109 antigen (Gov  
platelet alloantigens)•CD109•Hs.399891•ENSG00000156535•••4867 // serine-type  
endopeptidase inhibitor activity // inferred from electronic annotation ///  
17114 // wide-spectrum protease inhibitor activity // inferred from  
electronic annotation  
204279\_at•"gb:NM\_002800.1 /DB\_XREF=gi:4506204 /GEN=PSMB9 /FEA=FLmRNA /CNT=70  
/TID=Hs.9280.0 /TIER=FL /STK=1 /UG=Hs.9280 /LL=5698 /DEF=Homo sapiens  
proteasome (prosome, macropain) subunit, beta type, 9 (large multifunctional  
protease 2) (PSMB9), mRNA.  
/PROD=proteasom"•0.437673706•0.194677748•"proteasome (prosome, macropain)  
subunit, beta type, 9 (large multifunctional protease  
2)"•PSMB9•Hs.381081•ENSG00000112082•6508 // proteolysis and peptidolysis //  
not recorded /// 6511 // ubiquitin-dependent protein catabolism // inferred  
from electronic annotation /// 6955 // immune response // inferred from  
electronic annotation•5839 // proteasome core complex (sensu Eukaryota) //  
inferred from electronic annotation•4298 // threonine endopeptidase activity  
// inferred from electronic annotation  
228478\_at•"gb:AA889954 /DB\_XREF=gi:3016833 /DB\_XREF=aj95e11.s1  
/CLONE=IMAGE:1404236 /FEA=EST /CNT=22 /TID=Hs.167619.0 /TIER=Stack /STK=16  
/UG=Hs.167619 /UG\_TITLE=ESTs, Moderately similar to ALUC\_HUMAN !!!! ALU CLASS  
C WARNING ENTRY !!! (H.sapiens)"•0.435053104•0.381280343•Full length insert  
cDNA YH99G08••Hs.167619••••  
213455\_at•gb:W87466 /DB\_XREF=gi:1401521 /DB\_XREF=zh67c05.s1  
/CLONE=IMAGE:417128 /FEA=EST /CNT=52 /TID=Hs.246885.1 /TIER=Stack /STK=38  
/UG=Hs.246885 /LL=55041 /UG\_GENE=FLJ20783 /UG\_TITLE=hypothetical protein  
FLJ20783•0.432537215•0.250840931•Hypothetical protein  
BC001096•LOC92689•Hs.476517•ENSG00000197712•••  
209032\_s\_at•"gb:AF132811.1 /DB\_XREF=gi:7767238 /GEN=NECL2 /FEA=FLmRNA  
/CNT=252 /TID=Hs.70337.0 /TIER=FL+Stack /STK=25 /UG=Hs.70337 /LL=23705  
/DEF=Homo sapiens nectin-like protein 2 (NECL2) mRNA, complete cds.  
/PROD=nectin-like protein 2 /FL=gb:NM\_014333.1  
gb:AF132811."•0.431220131•0.429637615•"immunoglobulin superfamily, member  
4"•IGSF4•Hs.370510•ENSG00000182985•••  
1553672\_at•"gb:NM\_145240.1 /DB\_XREF=gi:21687113 /TID=Hs.2.32399.1 /CNT=33  
/FEA=FLmRNA /TIER=FL /STK=0 /LL=113521 /UG\_GENE=LOC113521 /UG=Hs.32399  
/UG\_TITLE=similar to avenaII /DEF=Homo sapiens similar to avenaII  
(LOC113521), mRNA. /FL=gb:NM\_145240.1  
gb:BC010414.1"•0.430976756•0.342682395•enabled homolog  
(Drosophila)•ENAH•Hs.497893•ENSG00000154380•7399 // neurogenesis // inferred  
from electronic annotation /// 30154 // cell differentiation // inferred from  
electronic annotation••  
225524\_at•gb:AU152178 /DB\_XREF=gi:11013699 /DB\_XREF=AU152178  
/CLONE=NT2RP3000356 /FEA=mRNA /CNT=116 /TID=Hs.5897.0 /TIER=Stack /STK=67  
/UG=Hs.5897 /UG\_TITLE=Homo sapiens mRNA; cDNA DKFZp586P1622 (from clone  
DKFZp586P1622)•0.427750705•0.30863352•anthrax toxin receptor  
2•ANTXR2•Hs.162963•ENSG00000163297••16021 // integral to membrane // inferred  
from electronic annotation•4872 // receptor activity // inferred from

electronic annotation

229674\_at\*gb:AL035414 /DB\_XREF=gi:6822166 /FEA=FLmRNA /CNT=23 /TID=Hs.21068.0 /TIER=Stack /STK=8 /UG=Hs.21068 /LL=56256 /UG\_GENE=DJ667H12.2 /UG\_TITLE=hypothetical protein /DEF=Human DNA sequence from clone RP4-667H12 on chromosome 1q32.1-41. Contains up to two nove\*0.423759123\*0.379446071\*SERTA domain containing 4\*SERTAD4\*Hs.445835\*ENSG00000082497\*\*\*

209290\_s\_at\*"gb:BC001283.1 /DB\_XREF=gi:12654878 /FEA=FLmRNA /CNT=149 /TID=Hs.33287.1 /TIER=FL+Stack /STK=18 /UG=Hs.33287 /LL=4781 /UG\_GENE=NFIB /DEF=Homo sapiens, Similar to nuclear factor IB, clone MGC:5146, mRNA, complete cds. /PROD=Similar to nuclear factor IB /FL="\*0.423547584\*0.488681451\*nuclear factor I/B\*NFIB\*Hs.370359\*ENSG00000147862\*"6260 // DNA replication // inferred from electronic annotation /// 6350 // transcription // inferred from electronic annotation /// 6355 // regulation of transcription, DNA-dependent // inferred from electronic annotation\*"5634 // nucleus // inferred from electronic annotation /// 5634 // nucleus // traceable author statement\*3700 // transcription factor activity // inferred from electronic annotation /// 3700 // transcription factor activity // traceable author statement

204472\_at\*"gb:NM\_005261.1 /DB\_XREF=gi:4885262 /GEN=GEM /FEA=FLmRNA /CNT=81 /TID=Hs.79022.0 /TIER=FL+Stack /STK=35 /UG=Hs.79022 /LL=2669 /DEF=Homo sapiens GTP-binding protein overexpressed in skeletal muscle (GEM), mRNA. /PROD=GTP-binding protein overexpressed in ske\*"0.422467351\*0.495277457\*GTP binding protein overexpressed in skeletal muscle\*GEM\*Hs.345139\*ENSG00000164949\*6955 // immune response // traceable author statement /// 7166 // cell surface receptor linked signal transduction // traceable author statement /// 7264 // small GTPase mediated signal transduction // inferred from electronic annotation\*16020 // membrane // inferred from electronic annotation\*5516 // calmodulin binding // inferred from electronic annotation /// 5525 // GTP binding // traceable author statement

211991\_s\_at\*"gb:M27487.1 /DB\_XREF=gi:703088 /GEN=HLA-DPA1 /FEA=FLmRNA /CNT=358 /TID=Hs.914.0 /TIER=FL+Stack /STK=139 /UG=Hs.914 /DEF=Homo sapiens MHC class II DPw3-alpha-1 chain mRNA, complete cds. /PROD=MHC class II DP3-alpha /FL=gb:M27487.1\*"0.422275942\*0.291777219\*"major histocompatibility complex, class II, DP alpha 1"\*HLA-DPA1\*Hs.347270\*ENSG00000168384\*"6955 // immune response // non-traceable author statement /// 19884 // antigen presentation, exogenous antigen // inferred from electronic annotation /// 19886 // antigen processing, exogenous antigen via MHC class II // inferred from electronic annotation\*"5887 // integral to plasma membrane // non-traceable author statement /// 16020 // membrane // inferred from electronic annotation\*45012 // MHC class II receptor activity // non-traceable author statement

200897\_s\_at\*"gb:NM\_016081.1 /DB\_XREF=gi:7706354 /GEN=KIAA0992 /FEA=FLmRNA /CNT=425 /TID=Hs.194431.0 /TIER=FL+Stack /STK=152 /UG=Hs.194431 /LL=23022 /DEF=Homo sapiens palladin (KIAA0992), mRNA. /PROD=palladin /FL=gb:AF151909.1 gb:AF077041.1

gb:NM\_016081.1\*"0.418080218\*0.180618883\*palladin\*KIAA0992\*Hs.151220\*ENSG00000129116\*6468 // protein amino acid phosphorylation // inferred from electronic annotation\*\*5021 // vascular endothelial growth factor receptor activity // inferred from electronic annotation /// 5524 // ATP binding // inferred from electronic annotation

200920\_s\_at\*"gb:AL535380 /DB\_XREF=gi:12798873 /DB\_XREF=AL535380 /CLONE=CS0DF009YN13 (5 prime) /FEA=FLmRNA /CNT=488 /TID=Hs.77054.0 /TIER=Stack /STK=181 /UG=Hs.77054 /LL=694 /UG\_GENE=BTG1 /UG\_TITLE=B-cell translocation gene 1, anti-proliferative /FL=gb:NM\_001731.1\*"0.416782751\*0.452403802\*"B-cell translocation gene 1, anti-proliferative"\*BTG1\*Hs.255935\*ENSG00000133639\*7286 // spermatid cell development // inferred from sequence or structural similarity /// 8285 // negative regulation of cell proliferation // inferred from direct assay /// 16477 // cell migration // non-traceable author statement /// 30308 // negative r\*5634 // nucleus // inferred from expression pattern /// 5634 // nucleus // inferred from mutant phenotype /// 5737 // cytoplasm // inferred from mutant phenotype\*3712 // transcription cofactor activity // non-traceable author statement /// 19900 // kinase binding // non-traceable author statement

212226\_s\_at\*"gb:AA628586 /DB\_XREF=gi:2540973 /DB\_XREF=af39f12.s1 /CLONE=IMAGE:1034063 /FEA=EST /CNT=335 /TID=Hs.173717.0 /TIER=Stack /STK=14 /UG=Hs.173717 /UG\_TITLE=Homo sapiens phosphatidic acid phosphatase type 2B (PPAP2B), mRNA\*"0.416682244\*0.272031761\*phosphatidic acid phosphatase type 2B\*PPAP2B\*Hs.405156\*ENSG00000162407\*6629 // lipid metabolism // non-traceable author statement /// 8354 // germ cell migration // traceable author statement\*16020 // membrane // traceable author statement /// 16021 // integral to membrane // inferred from electronic annotation\*4721 // phosphoprotein phosphatase activity // traceable author statement /// 8195 // phosphatidate phosphatase activity // inferred from electronic annotation /// 16787 // hydrolase activity // inferred from electronic annotation

224443\_at\*"gb:BC005997.1 /DB\_XREF=gi:13543694 /FEA=FLmRNA /CNT=1 /TID=HsAffx.900821.625 /TIER=FL /STK=0 /DEF=Homo sapiens, clone MGC:14801, mRNA, complete cds. /PROD=Unknown (protein for MGC:14801) /FL=gb:BC005997.1\*"0.416577394\*0.388279839\*hypothetical protein MGC14801 ///

hypothetical protein MGC14801•MGC14801•Hs.523932•ENSG00000153363•••  
212848\_s\_at•gb:BG036668 /DB\_XREF=gi:12432092 /DB\_XREF=602326882F1  
/CLONE=IMAGE:4428237 /FEA=EST /CNT=91 /TID=Hs.18075.0 /TIER=Stack /STK=61  
/UG=Hs.18075 /LL=23733 /UG\_GENE=C9ORF3 /UG\_TITLE=chromosome 9 open reading  
frame 3•0.414757456•0.130419511•chromosome 9 open reading frame  
3•C9orf3•Hs.434253•ENSG00000148120•6508 // proteolysis and peptidolysis //  
inferred from direct assay••4177 // aminopeptidase activity // inferred from  
direct assay /// 4179 // membrane alanyl aminopeptidase activity // inferred  
from electronic annotation /// 8237 // metallopeptidase activity // inferred  
from direct assay  
1568592\_at•"gb:BM976092 /DB\_XREF=gi:19593683  
/DB\_XREF=UI-CF-EN1-acy-e-14-0-UI.s1 /CLONE=UI-CF-EN1-acy-e-14-0-UI  
/TID=Hs2.374986.1 /CNT=104 /FEA=mRNA /TIER=Stack /STK=14 /UG=Hs.374986  
/UG\_TITLE=Homo sapiens, clone IMAGE:5277162,  
mRNA"•0.414577198•0.43358534•hypothetical gene supported by  
BC031266•LOC400368•Hs.489254••••  
201506\_at•"gb:NM\_000358.1 /DB\_XREF=gi:4507466 /GEN=TGFBI /FEA=FLmRNA /CNT=491  
/TID=Hs.118787.0 /TIER=FL+Stack /STK=253 /UG=Hs.118787 /LL=7045 /DEF=Homo  
sapiens transforming growth factor, beta-induced, 68kD (TGFBI), mRNA.  
/PROD=transforming growth factor,  
beta-induc"•0.414357905•0.432139104•"transforming growth factor,  
beta-induced, 68kDa"•TGFBI•Hs.369397•ENSG00000120708•7155 // cell adhesion //  
inferred from electronic annotation /// 7162 // negative regulation of cell  
adhesion // traceable author statement /// 7600 // sensory perception //  
inferred from electronic annotation /// 7601 // visual perception //  
traceable au•5578 // extracellular matrix (sensu Metazoa) // inferred from  
electronic annotation /// 5615 // extracellular space // traceable author  
statement•5178 // integrin binding // traceable author statement /// 5515 //  
protein binding // inferred from electronic annotation  
229900\_at•"gb:AL576908 /DB\_XREF=gi:12939516 /DB\_XREF=AL576908  
/CLONE=CS0DI081YB18 (3 prime) /FEA=EST /CNT=24 /TID=Hs.55964.0 /TIER=Stack  
/STK=17 /UG=Hs.55964 /UG\_TITLE=ESTs, Weakly similar to C4HU complement C4A  
precursor (H.sapiens)"•0.413998325•0.283778354•CD109 antigen (Gov platelet  
alloantigens)•CD109•Hs.399891•ENSG00000156535•••4867 // serine-type  
endopeptidase inhibitor activity // inferred from electronic annotation ///  
17114 // wide-spectrum protease inhibitor activity // inferred from  
electronic annotation  
231307\_at•"gb:AW002915 /DB\_XREF=gi:5849831 /DB\_XREF=wr02h09.x1  
/CLONE=IMAGE:2480417 /FEA=EST /CNT=16 /TID=Hs.293317.0 /TIER=Stack /STK=16  
/UG=Hs.293317 /UG\_TITLE=ESTs, Weakly similar to JM27  
(H.sapiens)"•0.413900522•0.347153308•Hypothetical  
LOC389860•LOC389860•Hs.293317•ENSG00000187761•••  
226343\_at•gb:W74486 /DB\_XREF=gi:1384960 /DB\_XREF=zd56b07.s1  
/CLONE=IMAGE:344629 /FEA=EST /CNT=69 /TID=Hs.6119.0 /TIER=Stack /STK=40  
/UG=Hs.6119 /UG\_TITLE=ESTs•0.413106104•0.463482496•Dipeptidylpeptidase  
8•DPP8•Hs.458609•ENSG00000074603•6508 // proteolysis and peptidolysis //  
inferred from electronic annotation /// 6508 // proteolysis and peptidolysis  
// non-traceable author statement /// 6508 // proteolysis and peptidolysis //  
traceable author statement /// 6955 // immune response // tr•5737 //  
cytoplasm // non-traceable author statement /// 5737 // cytoplasm //  
traceable author statement /// 16020 // membrane // inferred from electronic  
annotation•3824 // catalytic activity // inferred from electronic annotation  
/// 4274 // dipeptidyl-peptidase IV activity // inferred from electronic  
annotation  
227174\_at•gb:Z98443 /DB\_XREF=gi:2326591 /DB\_XREF=HSZ98443  
/CLONE=DKFZphthml1\_1e10 /FEA=EST /CNT=39 /TID=Hs.86366.0 /TIER=Stack /STK=20  
/UG=Hs.86366 /UG\_TITLE=ESTs•0.412077545•0.344206873•hypothetical protein  
FLJ38736•FLJ38736•Hs.208067•ENSG00000166415•••  
201850\_at•"gb:NM\_001747.1 /DB\_XREF=gi:4502560 /GEN=CAPG /FEA=FLmRNA /CNT=265  
/TID=Hs.82422.0 /TIER=FL+Stack /STK=106 /UG=Hs.82422 /LL=822 /DEF=Homo  
sapiens capping protein (actin filament), gelsolin-like (CAPG), mRNA.  
/PROD=capping protein (actin filament),  
gelsolin"•0.412010411•0.441914366•"capping protein (actin filament),  
gelsolin-like"•CAPG•Hs.516155•ENSG00000042493•"6461 // protein complex  
assembly // non-traceable author statement /// 9613 // response to pest,  
pathogen or parasite // traceable author statement /// 51016 // barbed-end  
actin filament capping // traceable author statement"•5634 // nucleus //  
inferred from electronic annotation /// 8290 // F-actin capping protein  
complex // traceable author statement•3779 // actin binding // inferred from  
electronic annotation  
225116\_at•"gb:AW300045 /DB\_XREF=gi:6709722 /DB\_XREF=xs45a11.x1  
/CLONE=IMAGE:2772572 /FEA=EST /CNT=104 /TID=Hs.75354.1 /TIER=Stack /STK=8  
/UG=Hs.75354 /LL=10985 /UG\_GENE=GCN1L1 /UG\_TITLE=GCN1 (general control of  
amino-acid synthesis 1, yeast)-like 1"•0.411892932•0.411740456•Homeodomain  
interacting protein kinase 2•HIPK2•Hs.397465•ENSG00000064393•"74 //  
regulation of cell cycle // non-traceable author statement /// 6350 //  
transcription // inferred from electronic annotation /// 6355 // regulation  
of transcription, DNA-dependent // inferred from electronic annotation ///  
6468 // protein amino acid "•5634 // nucleus // inferred from direct assay  
/// 5737 // cytoplasm // inferred from sequence or structural similarity ///  
16604 // nuclear body // traceable author statement•3714 // transcription

corepressor activity // traceable author statement /// 4674 // protein serine/threonine kinase activity // inferred from electronic annotation /// 5515 // protein binding // inferred from physical interaction /// 5524 // ATP binding

224952\_at\*gb:BF115054 /DB\_XREF=gi:10984530 /DB\_XREF=hr73f11.x1 /CLONE=IMAGE:3134157 /FEA=mRNA /CNT=107 /TID=Hs.4996.1 /TIER=Stack /STK=28 /UG=Hs.4996 /LL=26115 /UG\_GENE=DKFZP564D166 /UG\_TITLE=putative ankyrin-repeat containing protein\*0.411477271\*0.455240951\*putative ankyrin-repeat containing protein\*DKFZP564D166\*Hs.410889\*ENSG00000170921\*\*\*5488 // binding // inferred from electronic annotation

202201\_at\*"gb:NM\_000713.1 /DB\_XREF=gi:4502418 /GEN=BLVRB /FEA=FLmRNA /CNT=192 /TID=Hs.76289.0 /TIER=FL+Stack /STK=82 /UG=Hs.76289 /LL=645 /DEF=Homo sapiens biliverdin reductase B (flavin reductase (NADPH)) (BLVRB), mRNA. /PROD=biliverdin reductase B (flavin reductas"\*0.410997386\*0.231592297\*biliverdin reductase B (flavin reductase (NADPH))\*BLVRB\*Hs.515785\*ENSG00000090013\*9225 // nucleotide-sugar metabolism // inferred from electronic annotation\*\*4074 // biliverdin reductase activity // traceable author statement /// 16491 // oxidoreductase activity // inferred from electronic annotation /// 42602 // flavin reductase activity // inferred from electronic annotation

204034\_at\*"gb:NM\_014297.1 /DB\_XREF=gi:7657686 /GEN=YF13H12 /FEA=FLmRNA /CNT=100 /TID=Hs.7486.0 /TIER=FL+Stack /STK=83 /UG=Hs.7486 /LL=23474 /DEF=Homo sapiens protein expressed in thyroid (YF13H12), mRNA. /PROD=protein expressed in thyroid /FL=gb:NM\_014297.1"\*0.410168094\*0.443419337\*ethylmalonic encephalopathy 1\*ETHE1\*Hs.7486\*ENSG00000105755\*\*\*16787 // hydrolase activity // inferred from electronic annotation

206172\_at\*"gb:NM\_000640.1 /DB\_XREF=gi:10834991 /GEN=IL13RA2 /FEA=FLmRNA /CNT=23 /TID=Hs.25954.0 /TIER=FL /STK=0 /UG=Hs.25954 /LL=3598 /DEF=Homo sapiens interleukin 13 receptor, alpha 2 (IL13RA2), mRNA. /PROD=interleukin 13 receptor, alpha 2 /FL=gb:U70981.1 gb:NM\_000"\*0.409209733\*0.444132952\*"interleukin 13 receptor, alpha 2"\*IL13RA2\*Hs.336046\*ENSG00000123496\*\*5615 // extracellular space // traceable author statement /// 5625 // soluble fraction // traceable author statement /// 16020 // membrane // inferred from electronic annotation /// 16021 // integral to membrane // inferred from electronic annotation\*4872 // receptor activity // inferred from electronic annotation /// 4907 // interleukin receptor activity // traceable author statement

203719\_at\*"gb:NM\_001983.1 /DB\_XREF=gi:4503598 /GEN=ERCC1 /FEA=FLmRNA /CNT=117 /TID=Hs.59544.0 /TIER=FL+Stack /STK=27 /UG=Hs.59544 /LL=2067 /DEF=Homo sapiens excision repair cross-complementing rodent repair deficiency, complementation group 1 (includes overlapping a"\*0.408765851\*0.418580394\*"excision repair cross-complementing rodent repair deficiency, complementation group 1 (includes overlapping antisense sequence)"\*ERCC1\*Hs.435981\*ENSG00000012061\*6281 // DNA repair // inferred from electronic annotation /// 6289 // nucleotide-excision repair // not recorded /// 9653 // morphogenesis // traceable author statement\*5634 // nucleus // inferred from electronic annotation /// 5634 // nucleus // traceable author statement\*3684 // damaged DNA binding // inferred from electronic annotation /// 4519 // endonuclease activity // inferred from electronic annotation /// 4520 // endodeoxyribonuclease activity // not recorded /// 16787 // hydrolase activity // inferred from electro

221875\_x\_at\*"gb:AW514210 /DB\_XREF=gi:7152378 /DB\_XREF=hd75b05.x1 /CLONE=IMAGE:2915313 /FEA=EST /CNT=43 /TID=Hs.110309.1 /TIER=Stack /STK=30 /UG=Hs.110309 /LL=3134 /UG\_GENE=HLA-F /UG\_TITLE=major histocompatibility complex, class I, F"\*0.408629326\*0.418756127\*"major histocompatibility complex, class I, F"\*HLA-F\*Hs.519972\*ENSG00000137403\*"19883 // antigen presentation, endogenous antigen // inferred from electronic annotation /// 19885 // antigen processing, endogenous antigen via MHC class I // inferred from electronic annotation"\*16021 // integral to membrane // inferred from electronic annotation /// 42612 // MHC class I protein complex // inferred from electronic annotation\*30106 // MHC class I receptor activity // traceable author statement

203313\_s\_at\*"gb:NM\_003244.1 /DB\_XREF=gi:4507472 /GEN=TGIF /FEA=FLmRNA /CNT=128 /TID=Hs.90077.0 /TIER=FL+Stack /STK=32 /UG=Hs.90077 /LL=7050 /DEF=Homo sapiens TG-interacting factor (TALE family homeobox) (TGIF), mRNA. /PROD=TG-interacting factor (TALE family homeobox) "\*0.408265837\*0.460226533\*TGFB-induced factor (TALE family homeobox)\*TGIF\*Hs.373550\*ENSG00000177426\*"122 // negative regulation of transcription from RNA polymerase II promoter // traceable author statement /// 6350 // transcription // inferred from electronic annotation /// 6355 // regulation of transcription, DNA-dependent // inferred from electronic a"\*5634 // nucleus // inferred from electronic annotation /// 5634 // nucleus // not recorded\*3700 // transcription factor activity // inferred from electronic annotation /// 3700 // transcription factor activity // traceable author statement /// 3714 // transcription corepressor activity // traceable author statement

203988\_s\_at\*"gb:NM\_004480.1 /DB\_XREF=gi:4758407 /GEN=FUT8 /FEA=FLmRNA /CNT=78 /TID=Hs.118722.0 /TIER=FL /STK=0 /UG=Hs.118722 /LL=2530 /DEF=Homo sapiens fucosyltransferase 8 (alpha (1,6) fucosyltransferase) (FUT8), mRNA. /PROD=fucosyltransferase 8 (alpha (1,6)fucosyltr"\*0.408163022\*0.388781721\*"fucosyltransferase 8 (alpha (1,6)

fucosyltransferase)"•FUT8•Hs.118722•ENSG00000033170•1701 // embryonic development (sensu Mammalia) // non-traceable author statement /// 6491 // N-glycan processing // traceable author statement /// 9312 // oligosaccharide biosynthesis // traceable author statement /// 42355 // L-fucose catabolism // non-t•5794 // Golgi apparatus // non-traceable author statement /// 16021 // integral to membrane // inferred from electronic annotation•"8424 // glycoprotein 6-alpha-L-fucosyltransferase activity // traceable author statement /// 16757 // transferase activity, transferring glycosyl groups // inferred from electronic annotation"

228038\_at•gb:AI669815 /DB\_XREF=gi:4834589 /DB\_XREF=tu31f07.x1 /CLONE=IMAGE:2252677 /FEA=EST /CNT=31 /TID=Hs.129911.0 /TIER=Stack /STK=25 /UG=Hs.129911 /UG\_TITLE=ESTs•0.406076844•0.461003072•SRY (sex determining region Y)-box 2•SOX2•Hs.518438•ENSG00000181449•"6325 // establishment and/or maintenance of chromatin architecture // non-traceable author statement /// 6350 // transcription // inferred from electronic annotation /// 6355 // regulation of transcription, DNA-dependent // non-traceable author statement"•5634 // nucleus // non-traceable author statement•3700 // transcription factor activity // non-traceable author statement

228293\_at•gb:AJ245600.1 /DB\_XREF=gi:5763726 /GEN=TR2D15 /FEA=mRNA /CNT=32 /TID=Hs.180545.0 /TIER=Stack /STK=18 /UG=Hs.180545 /DEF=Homo sapiens mRNA for hypothetical protein (TR2D15 gene). /PROD=hypothetical protein•0.405949363•0.300162246•novel 58.3 KDA protein•LOC91614•Hs.280990•ENSG00000121690•7242 // intracellular signaling cascade // inferred from electronic annotation•5634 // nucleus // inferred from electronic annotation•3677 // DNA binding // inferred from electronic annotation

222487\_s\_at•"gb:BC003667.1 /DB\_XREF=gi:13277527 /FEA=FLmRNA /CNT=230 /TID=Hs.108957.0 /TIER=ConsEnd /STK=0 /UG=Hs.108957 /LL=51065 /UG\_GENE=LOC51065 /DEF=Homo sapiens, Similar to 40S ribosomal protein S27 isoform, clone MGC:12175, mRNA, complete cds. /PROD=Similar to "•0.402423364•0.357800605•ribosomal protein S27-like•RPS27L•Hs.108957•ENSG00000185088•6412 // protein biosynthesis // inferred from electronic annotation•5840 // ribosome // inferred from electronic annotation•3735 // structural constituent of ribosome // inferred from electronic annotation

217080\_s\_at•"gb:Y19026.1 /DB\_XREF=gi:6996435 /GEN=Homer-2 /FEA=mRNA /CNT=1 /TID=Hs.93564.3 /TIER=ConsEnd /STK=0 /UG=Hs.93564 /LL=9455 /DEF=Homo sapiens mRNA for Homer-2 protein, Homer-2B splicing form. /PROD=Homer-2 protein, Homer-2B splicing form"•0.401726718•0.419772495•homer homolog 2 (Drosophila)•HOMER2•Hs.93564•ENSG00000103942•7216 // metabotropic glutamate receptor signaling pathway // traceable author statement••

238877\_at•gb:BE674583 /DB\_XREF=gi:10035124 /DB\_XREF=7e02h07.x1 /CLONE=IMAGE:3281341 /FEA=EST /CNT=7 /TID=Hs.102408.0 /TIER=ConsEnd /STK=4 /UG=Hs.102408 /UG\_TITLE=ESTs•0.401046982•0.378191097•Eyes absent homolog 4 (Drosophila)•EYA4•Hs.549032•ENSG00000112319•"6350 // transcription // inferred from electronic annotation /// 6355 // regulation of transcription, DNA-dependent // inferred from electronic annotation /// 7275 // development // inferred from electronic annotation /// 7601 // visual perception // trac"•5634 // nucleus // inferred from electronic annotation•287 // magnesium ion binding // inferred from electronic annotation /// 3824 // catalytic activity // inferred from electronic annotation /// 4725 // protein tyrosine phosphatase activity // inferred from electronic annotation /// 16787 // hydrolase activ

223614\_at•gb:AL136588.1 /DB\_XREF=gi:13276678 /GEN=DKFZp761D112 /FEA=FLmRNA /CNT=28 /TID=Hs.103849.0 /TIER=FL+Stack /STK=20 /UG=Hs.103849 /DEF=Homo sapiens mRNA; cDNA DKFZp761D112 (from clone DKFZp761D112); complete cds. /PROD=hypothetical protein /FL=gb:AL136588.1•0.399716625•0.479980677•hypothetical protein DKFZp761D112•DKFZp761D112•Hs.492187••••

222877\_at•"gb:AK024680.1 /DB\_XREF=gi:10437021 /FEA=FLmRNA /CNT=61 /TID=Hs.63382.0 /TIER=Stack /STK=32 /UG=Hs.63382 /LL=55403 /UG\_GENE=PRO2714 /UG\_TITLE=hypothetical protein PRO2714 /DEF=Homo sapiens cDNA: FLJ21027 fis, clone CAE07110. /FL=gb:NM\_018534.1"•0.398508487•0.412770677•Neuropilin 2•NRP2•Hs.471200•ENSG00000118257•1525 // angiogenesis // non-traceable author statement /// 6118 // electron transport // inferred from electronic annotation /// 7155 // cell adhesion // inferred from electronic annotation /// 7155 // cell adhesion // non-traceable author statement /// 7•5624 // membrane fraction // traceable author statement /// 16020 // membrane // inferred from electronic annotation /// 16021 // integral to membrane // inferred from electronic annotation /// 16021 // integral to membrane // non-traceable author stateme•4872 // receptor activity // traceable author statement /// 5021 // vascular endothelial growth factor receptor activity // non-traceable author statement /// 5021 // vascular endothelial growth factor receptor activity // traceable author statement /// 5

208894\_at•"gb:M60334.1 /DB\_XREF=gi:188255 /GEN=HLA-DRA /FEA=FLmRNA /CNT=470 /TID=Hs.76807.0 /TIER=FL /STK=0 /UG=Hs.76807 /LL=3122 /DEF=Human MHC class II HLA-DR-alpha mRNA, complete cds. /PROD=cell surface glycoprotein /FL=gb:M60334.1 gb:NM\_019111.1"•0.397295711•0.273340003"major histocompatibility complex, class II, DR alpha /// major histocompatibility complex, class II, DR alpha"•HLA-DRA•Hs.520048•ENSG00000168423 /// ENSG00000198334•"6955 // immune response // inferred from electronic

annotation /// 6955 // immune response // non-traceable author statement ///  
19884 // antigen presentation, exogenous antigen // inferred from electronic  
annotation /// 19886 // antigen processing, exoge"•5887 // integral to plasma  
membrane // non-traceable author statement /// 16020 // membrane // inferred  
from electronic annotation /// 16021 // integral to membrane // inferred from  
electronic annotation•45012 // MHC class II receptor activity //  
non-traceable author statement  
203060\_s\_at•"gb:AF074331.1 /DB\_XREF=gi:5052074 /GEN=PAPSS2 /FEA=FLmRNA  
/CNT=156 /TID=Hs.274230.0 /TIER=FL+Stack /STK=29 /UG=Hs.274230 /LL=9060  
/DEF=Homo sapiens PAPS synthetase-2 (PAPSS2) mRNA, complete cds. /PROD=PAPS  
synthetase-2 /FL=gb:AF313907.1 gb:AF173365.1  
gb:A"•0.397190655•0.420607315•3'-phosphoadenosine 5'-phosphosulfate synthase  
2•PAPSS2•Hs.524491•ENSG00000198682•"103 // sulfate assimilation // inferred  
from electronic annotation /// 1501 // skeletal development // inferred from  
sequence or structural similarity /// 6139 // nucleobase, nucleoside,  
nucleotide and nucleic acid metabolism // not recorded"•5622 // intracellular  
// inferred from sequence or structural similarity•4020 // adenylyl-sulfate  
kinase activity // inferred from electronic annotation /// 4781 // sulfate  
adenylyltransferase (ATP) activity // inferred from sequence or structural  
similarity /// 5524 // ATP binding // inferred from sequence or structural  
simil  
205567\_at•"gb:NM\_003654.1 /DB\_XREF=gi:4502840 /GEN=CHST1 /FEA=FLmRNA /CNT=52  
/TID=Hs.104576.0 /TIER=FL+Stack /STK=29 /UG=Hs.104576 /LL=8534 /DEF=Homo  
sapiens carbohydrate (chondroitin 6keratan) sulfotransferase 1 (CHST1), mRNA.  
/PROD=carbohydrate (chondroitin 6kerat"•0.396331704•0.400611059•carbohydrate  
(keratan sulfate Gal-6) sulfotransferase  
1•CHST1•Hs.104576•ENSG00000175264•5976 // polysaccharide metabolism //  
traceable author statement /// 6012 // galactose metabolism // inferred from  
direct assay /// 6954 // inflammatory response // inferred from electronic  
annotation /// 42339 // keratan sulfate metabolism // inferred fro•5794 //  
Golgi apparatus // inferred from electronic annotation /// 16021 // integral  
to membrane // non-traceable author statement /// 31228 // intrinsic to Golgi  
membrane // inferred from sequence or structural similarity•16740 //  
transferase activity // inferred from electronic annotation /// 45130 //  
keratan sulfotransferase activity // inferred from direct assay  
218162\_at•"gb:NM\_020190.1 /DB\_XREF=gi:9910269 /GEN=HNOEL-iso /FEA=FLmRNA  
/CNT=185 /TID=Hs.9315.0 /TIER=FL /STK=0 /UG=Hs.9315 /LL=56944 /DEF=Homo  
sapiens HNOEL-iso protein (HNOEL-iso), mRNA. /PROD=HNOEL-iso protein  
/FL=gb:NM\_020190.1 gb:AF201945.1"•0.395020558•0.286809714•olfactomedin-like  
3•OLFML3•Hs.9315•ENSG00000116774•••  
224455\_s\_at•"gb:BC006112.1 /DB\_XREF=gi:13543939 /FEA=FLmRNA /CNT=1  
/TID=HsAffx.900856.463 /TIER=FL /STK=0 /DEF=Homo sapiens, Similar to RIKEN  
cDNA 2610017G09 gene, clone MGC:12975, mRNA, complete cds. /PROD=Similar to  
RIKEN cDNA 2610017G09 gene  
/FL=gb:BC006112.1"•0.394881929•0.384062406•ADP-dependent glucokinase ///  
ADP-dependent glucokinase•ADPGK•Hs.513013•ENSG00000159322•5975 //  
carbohydrate metabolism // inferred from electronic annotation••"16773 //  
phosphotransferase activity, alcohol group as acceptor // inferred from  
electronic annotation"  
219641\_at•"gb:NM\_017996.1 /DB\_XREF=gi:8922230 /GEN=FLJ10103 /FEA=FLmRNA  
/CNT=27 /TID=Hs.42140.0 /TIER=FL+Stack /STK=12 /UG=Hs.42140 /LL=55070  
/DEF=Homo sapiens hypothetical protein FLJ10103 (FLJ10103), mRNA.  
/PROD=hypothetical protein FLJ10103 /FL=gb:BC001242.1  
gb:N"•0.393239993•0.247291887•de-etiolated homolog 1  
(Arabidopsis)•DET1•Hs.42140•ENSG00000140543•6512 // ubiquitin cycle //  
inferred from electronic annotation•5634 // nucleus // inferred from  
electronic annotation•  
201860\_s\_at•"gb:NM\_000930.1 /DB\_XREF=gi:4505860 /GEN=PLAT /FEA=FLmRNA  
/CNT=265 /TID=Hs.274404.0 /TIER=FL+Stack /STK=118 /UG=Hs.274404 /LL=5327  
/DEF=Homo sapiens plasminogen activator, tissue (PLAT), mRNA.  
/PROD=plasminogen activator, tissue /FL=gb:NM\_000930.1  
gb:NM\_00"•0.392603088•0.397742182•"plasminogen activator,  
tissue"•PLAT•Hs.491582•ENSG00000104368•6464 // protein modification //  
traceable author statement /// 6508 // proteolysis and peptidolysis //  
inferred from electronic annotation /// 6508 // proteolysis and peptidolysis  
// traceable author statement /// 7596 // blood coagulation // traceable  
au•5576 // extracellular region // inferred from electronic annotation•4263  
// chymotrypsin activity // inferred from electronic annotation /// 4295 //  
trypsin activity // inferred from electronic annotation /// 8233 // peptidase  
activity // inferred from electronic annotation /// 8243 // plasminogen  
activator activity // in  
217478\_s\_at•"gb:X76775 /DB\_XREF=gi:512468 /FEA=DNA\_1 /CNT=1 /TID=Hs.77522.1  
/TIER=ConsEnd /STK=0 /UG=Hs.77522 /LL=3108 /UG\_GENE=HLA-DMA /UG\_TITLE=major  
histocompatibility complex, class II, DM alpha /DEF=H.sapiens HLA-DMA  
gene"•0.392526553•0.176028156•"major histocompatibility complex, class II, DM  
alpha"•HLA-DMA•Hs.351279•ENSG00000124546•"6955 // immune response // inferred  
from electronic annotation /// 9596 // detection of pest, pathogen or  
parasite // traceable author statement /// 19884 // antigen presentation,  
exogenous antigen // inferred from electronic annotation /// 19886 //  
antig"•16020 // membrane // inferred from electronic annotation /// 16021 //  
integral to membrane // inferred from electronic annotation•5515 // protein



binding // traceable author statement /// 45012 // MHC class II receptor activity // inferred from electronic annotation /// 45012 // MHC class II receptor activity // non-traceable author statement  
206256\_at\*"gb:NM\_001308.1 /DB\_XREF=gi:4503010 /GEN=CPN1 /FEA=FLmRNA /CNT=22 /TID=Hs.2246.0 /TIER=FL+Stack /STK=14 /UG=Hs.2246 /LL=1369 /DEF=Homo sapiens carboxypeptidase N, polypeptide 1, 50kD (CPN1), mRNA. /PROD=carboxypeptidase N, polypeptide 1, 50kDprecursor  
/FL="\*0.392081707\*0.247931577\*"carboxypeptidase N, polypeptide 1, 50kD\*CPN1\*Hs.2246\*ENSG00000120054\*6508 // proteolysis and peptidolysis // inferred from electronic annotation\*5615 // extracellular space // traceable author statement\*4182 // carboxypeptidase A activity // inferred from electronic annotation /// 4184 // lysine carboxypeptidase activity // inferred from electronic annotation /// 8237 // metallopeptidase activity // inferred from electronic annotation  
202032\_s\_at\*"gb:NM\_006122.1 /DB\_XREF=gi:5540099 /GEN=MAN2A2 /FEA=FLmRNA /CNT=161 /TID=Hs.295605.0 /TIER=FL+Stack /STK=54 /UG=Hs.295605 /LL=4122 /DEF=Homo sapiens mannosidase, alpha, class 2A, member 2 (MAN2A2), mRNA. /PROD=mannosidase, alpha, class 2A, member 2  
/FL=gb\*"0.391527667\*0.389772804\*"mannosidase, alpha, class 2A, member 2"\*MAN2A2\*Hs.116459\*5975 // carbohydrate metabolism // non-traceable author statement /// 6013 // mannose metabolism // inferred from electronic annotation\*139 // Golgi membrane // non-traceable author statement /// 16021 // integral to membrane // inferred from electronic annotation\*"4559 // alpha-mannosidase activity // inferred from electronic annotation /// 4572 // mannosyl-oligosaccharide 1,3-1,6-alpha-mannosidase activity // non-traceable author statement /// 16798 // hydrolase activity, acting on glycosyl bonds // inferred from "  
201998\_at\*"gb:AI743792 /DB\_XREF=gi:5112080 /DB\_XREF=wg53h11.x1 /CLONE=IMAGE:2368869 /FEA=FLmRNA /CNT=240 /TID=Hs.2554.0 /TIER=Stack /STK=107 /UG=Hs.2554 /LL=6480 /UG\_GENE=SIAT1 /UG\_TITLE=sialyltransferase 1 (beta-galactoside alpha-2,6-sialyltransferase)  
/FL=gb:NM\_003\*"0.391063229\*0.331896825\*"ST6 beta-galactosamide alpha-2,6-sialyltransferase 1"\*ST6GAL1\*Hs.207459\*ENSG00000073849\*6486 // protein amino acid glycosylation // inferred from electronic annotation /// 6959 // humoral immune response // traceable author statement /// 9311 // oligosaccharide metabolism // inferred from sequence or structural similarity /// 40007 // growth\*5794 // Golgi apparatus // inferred from electronic annotation /// 16020 // membrane // inferred from electronic annotation /// 16021 // integral to membrane // inferred from sequence or structural similarity\*"3835 // beta-galactoside alpha-2,6-sialyltransferase activity // inferred from sequence or structural similarity"  
230493\_at\*"gb:AW664964 /DB\_XREF=gi:7457508 /DB\_XREF=hi98e03.x1 /CLONE=IMAGE:2980348 /FEA=EST /CNT=13 /TID=Hs.128899.0 /TIER=Stack /STK=10 /UG=Hs.128899 /UG\_TITLE=ESTs\*0.390452473\*0.461336168\*transmembrane protein 46\*TMEM46\*Hs.433791\*ENSG00000180730\*16021 // integral to membrane // inferred from electronic annotation\*  
204014\_at\*"gb:NM\_001394.2 /DB\_XREF=gi:12707552 /GEN=DUSP4 /FEA=FLmRNA /CNT=105 /TID=Hs.2359.0 /TIER=FL /STK=4 /UG=Hs.2359 /LL=1846 /DEF=Homo sapiens dual specificity phosphatase 4 (DUSP4), mRNA. /PROD=dual specificity phosphatase 4 /FL=gb:NM\_001394.2 gb:BC002671.1 g\*"0.388623967\*0.323797205\*dual specificity phosphatase 4\*DUSP4\*Hs.417962\*ENSG00000120875\*74 // regulation of cell cycle // non-traceable author statement /// 165 // MAPKKK cascade // traceable author statement /// 6470 // protein amino acid dephosphorylation // inferred from electronic annotation /// 6470 // protein amino acid dephosphorylating\*5634 // nucleus // traceable author statement\*4725 // protein tyrosine phosphatase activity // inferred from electronic annotation /// 8330 // protein tyrosine/threonine phosphatase activity // traceable author statement /// 16787 // hydrolase activity // inferred from electronic annotation /// 17017  
218007\_s\_at\*"gb:NM\_015920.1 /DB\_XREF=gi:7705705 /GEN=LOC51065 /FEA=FLmRNA /CNT=230 /TID=Hs.108957.0 /TIER=FL+Stack /STK=142 /UG=Hs.108957 /LL=51065 /DEF=Homo sapiens 40S ribosomal protein S27 isoform (LOC51065), mRNA. /PROD=40S ribosomal protein S27 isoform  
/FL=gb:NM\_\*"0.388044463\*0.488953891\*ribosomal protein S27-like\*RPS27L\*Hs.108957\*ENSG00000185088\*6412 // protein biosynthesis // inferred from electronic annotation\*5840 // ribosome // inferred from electronic annotation\*3735 // structural constituent of ribosome // inferred from electronic annotation  
204137\_at\*"gb:NM\_003272.1 /DB\_XREF=gi:4507544 /GEN=TM7SF1 /FEA=FLmRNA /CNT=93 /TID=Hs.15791.0 /TIER=FL+Stack /STK=43 /UG=Hs.15791 /LL=7107 /DEF=Homo sapiens transmembrane 7 superfamily member 1 (upregulated in kidney) (TM7SF1), mRNA. /PROD=transmembrane 7 superfamily member 1 (upregulated in kidney)\*TM7SF1\*Hs.498160\*ENSG00000077585\*5624 // membrane fraction // traceable author statement /// 5887 // integral to plasma membrane // traceable author statement\*  
202447\_at\*"gb:NM\_001359.1 /DB\_XREF=gi:4503300 /GEN=DEC1 /FEA=FLmRNA /CNT=168 /TID=Hs.81548.0 /TIER=FL+Stack /STK=60 /UG=Hs.81548 /LL=1666 /DEF=Homo sapiens 2,4-dienoyl CoA reductase 1, mitochondrial (DEC1), nuclear gene encoding mitochondrial protein, mRNA.  
/PROD="\*0.38616285\*0.431639712\*"2,4-dienoyl CoA reductase 1,

mitochondrial"•DECR1•Hs.492212•ENSG00000104325•8152 // metabolism // inferred from electronic annotation•5739 // mitochondrion // traceable author statement•"8670 // 2,4-dienoyl-CoA reductase (NADPH) activity // traceable author statement /// 16491 // oxidoreductase activity // inferred from electronic annotation"

203058\_s\_at•gb:AW299958 /DB\_XREF=gi:6709635 /DB\_XREF=xs44g05.x1 /CLONE=IMAGE:2772536 /FEA=FLmRNA /CNT=156 /TID=Hs.274230.0 /TIER=Stack /STK=31 /UG=Hs.274230 /LL=9060 /UG\_GENE=PAPSS2 /UG\_TITLE=3-phosphoadenosine 5-phosphosulfate synthase 2 /FL=gb:AF313907.1

gb:AF17336•0.385586063•0.419968482•3'-phosphoadenosine 5'-phosphosulfate synthase 2•PAPSS2•Hs.524491•ENSG00000198682•"103 // sulfate assimilation // inferred from electronic annotation /// 1501 // skeletal development // inferred from sequence or structural similarity /// 6139 // nucleobase, nucleoside, nucleotide and nucleic acid metabolism // not recorded"•5622 // intracellular // inferred from sequence or structural similarity•4020 // adenylyl-sulfate kinase activity // inferred from electronic annotation /// 4781 // sulfate adenylyltransferase (ATP) activity // inferred from sequence or structural similarity /// 5524 // ATP binding // inferred from sequence or structural simil

202187\_s\_at•"gb:NM\_006243.1 /DB\_XREF=gi:5453949 /GEN=PPP2R5A /FEA=FLmRNA /CNT=214 /TID=Hs.155079.0 /TIER=FL+Stack /STK=87 /UG=Hs.155079 /LL=5525 /DEF=Homo sapiens protein phosphatase 2, regulatory subunit B (B56), alpha isoform (PPP2R5A), mRNA. /PROD=protein phosphata"•0.385210751•0.356344664•"protein phosphatase 2, regulatory subunit B (B56), alpha isoform"•PPP2R5A•Hs.497684•ENSG00000066027•7165 // signal transduction // inferred from electronic annotation•159 // protein phosphatase type 2A complex // inferred from electronic annotation /// 5737 // cytoplasm // traceable author statement•4721 // phosphoprotein phosphatase activity // inferred from electronic annotation /// 5515 // protein binding // inferred from physical interaction /// 8601 // protein phosphatase type 2A regulator activity // traceable author statement /// 16787 // hydr

202598\_at•"gb:NM\_005979.1 /DB\_XREF=gi:5174658 /GEN=S100A13 /FEA=FLmRNA /CNT=149 /TID=Hs.14331.0 /TIER=FL+Stack /STK=81 /UG=Hs.14331 /LL=6284 /DEF=Homo sapiens S100 calcium-binding protein A13 (S100A13), mRNA. /PROD=S100 calcium-binding protein A13 /FL=gb:BC000632.1 "•0.384911001•0.329287525•S100 calcium binding protein A13•S100A13•Hs.516505•ENSG00000189171•30154 // cell differentiation // non-traceable author statement••5509 // calcium ion binding // traceable author statement

224959\_at•"gb:AI718385 /DB\_XREF=gi:5035641 /DB\_XREF=as59f10.x1 /CLONE=IMAGE:2333035 /FEA=mRNA /CNT=144 /TID=Hs.302738.0 /TIER=Stack /STK=34 /UG=Hs.302738 /UG\_TITLE=Homo sapiens cDNA: FLJ21425 fis, clone COL04162"•0.384136788•0.3751153•"solute carrier family 26 (sulfate transporter), member 2"•SLC26A2•Hs.302738•ENSG00000155850•6810 // transport // inferred from electronic annotation /// 8272 // sulfate transport // traceable author statement•5624 // membrane fraction // traceable author statement /// 5887 // integral to plasma membrane // traceable author statement /// 16020 // membrane // inferred from electronic annotation•8271 // sulfate porter activity // inferred from electronic annotation

235337\_at•gb:AI276403 /DB\_XREF=gi:3898677 /DB\_XREF=qw06b03.x1 /CLONE=IMAGE:1990253 /FEA=EST /CNT=14 /TID=Hs.88143.0 /TIER=ConsEnd /STK=2 /UG=Hs.88143 /UG\_TITLE=ESTs•0.380236771•0.333425224•SERTA domain containing 4•SERTAD4•Hs.445835•ENSG00000082497•••

225102\_at•gb:BG168471 /DB\_XREF=gi:12675184 /DB\_XREF=602339623F1 /CLONE=IMAGE:4447685 /FEA=mRNA /CNT=101 /TID=Hs.3964.0 /TIER=Stack /STK=31 /UG=Hs.3964 /UG\_TITLE=Homo sapiens clone 24877 mRNA sequence•0.37982234•0.360708155•monoglyceride lipase•MGLL•Hs.277035•ENSG00000074416•6629 // lipid metabolism // traceable author statement /// 6725 // aromatic compound metabolism // inferred from electronic annotation /// 6954 // inflammatory response // traceable author statement••4622 // lysophospholipase activity // traceable author statement /// 4759 // serine esterase activity // inferred from electronic annotation /// 16787 // hydrolase activity // inferred from electronic annotation /// 47372 // acylglycerol lipase activity /

228060\_at•gb:AI809083 /DB\_XREF=gi:5395649 /DB\_XREF=wf68b10.x1 /CLONE=IMAGE:2360731 /FEA=EST /CNT=30 /TID=Hs.20976.0 /TIER=Stack /STK=12 /UG=Hs.20976 /UG\_TITLE=ESTs•0.379195861•0.423854532•"solute carrier family 35, member F1"•SLC35F1•Hs.549284•ENSG00000196376•••

203408\_s\_at•"gb:NM\_002971.1 /DB\_XREF=gi:4506790 /GEN=SATB1 /FEA=FLmRNA /CNT=196 /TID=Hs.74592.0 /TIER=FL+Stack /STK=31 /UG=Hs.74592 /LL=6304 /DEF=Homo sapiens special AT-rich sequence binding protein 1 (binds to nuclear matrixscaffold-associating DNAs) (SATB1), mRNA. "•0.378378075•0.232377319•special AT-rich sequence binding protein 1 (binds to nuclear matrix/scaffold-associating DNA's)•SATB1•Hs.517717•ENSG00000182568•"6325 // establishment and/or maintenance of chromatin architecture // traceable author statement /// 6355 // regulation of transcription, DNA-dependent // inferred from electronic annotation"•5634 // nucleus // traceable author statement•3690 // double-stranded DNA binding // traceable author statement /// 3700 // transcription factor activity // inferred from electronic annotation

211000\_s\_at•"gb:AB015706.1 /DB\_XREF=gi:4972293 /GEN=gp130 /FEA=FLmRNA /CNT=2

/TID=Hs.82065.1 /TIER=FL /STK=0 /UG=Hs.82065 /LL=3572 /DEF=Homo sapiens mRNA for gp130 of the rheumatoid arthritis antigenic peptide-bearing soluble form (gp130-RAPS), complete cds. /PROD=gp1"•0.375248776•0.381619715•"interleukin 6 signal transducer (gp130, oncostatin M receptor)"•IL6ST•Hs.532082•ENSG00000134352•6955 // immune response // traceable author statement /// 7166 // cell surface receptor linked signal transduction // traceable author statement•5886 // plasma membrane // traceable author statement /// 5887 // integral to plasma membrane // traceable author statement•4872 // receptor activity // traceable author statement /// 4915 // interleukin-6 receptor activity // traceable author statement /// 4924 // oncostatin-M receptor activity // traceable author statement

232270\_at•gb:AL137535.1 /DB\_XREF=gi:6808211 /FEA=mRNA /CNT=11 /TID=Hs.15806.0 /TIER=ConsEnd /STK=0 /UG=Hs.15806 /UG\_TITLE=Homo sapiens mRNA; cDNA DKFZp434H2019 (from clone DKFZp434H2019) /DEF=Homo sapiens mRNA; cDNA DKFZp434H2019 (from clone DKFZp434H2019).•0.374375004•0.418956372•Chromosome 9 open reading frame 3•C9orf3•Hs.434253•ENSG00000148120•6508 // proteolysis and peptidolysis // inferred from direct assay••4177 // aminopeptidase activity // inferred from direct assay /// 4179 // membrane alanyl aminopeptidase activity // inferred from electronic annotation /// 8237 // metallopeptidase activity // inferred from direct assay

225685\_at•gb:AI801777 /DB\_XREF=gi:5367249 /DB\_XREF=to95d04.x1 /CLONE=IMAGE:2186023 /FEA=EST /CNT=92 /TID=Hs.6774.0 /TIER=Stack /STK=38 /UG=Hs.6774 /UG\_TITLE=ESTs•0.373518748•0.432762819•CDC42 effector protein (Rho GTPase binding) 3•CDC42EP3•Hs.369574•ENSG00000163171•7165 // signal transduction // traceable author statement••5519 // cytoskeletal regulatory protein binding // traceable author statement

203932\_at•"gb:NM\_002118.1 /DB\_XREF=gi:4504398 /GEN=HLA-DMB /FEA=FLmRNA /CNT=91 /TID=Hs.1162.0 /TIER=FL+Stack /STK=49 /UG=Hs.1162 /LL=3109 /DEF=Homo sapiens major histocompatibility complex, class II, DM beta (HLA-DMB), mRNA. /PROD=major histocompatibility complex, c"•0.37343969•0.301885343•"major histocompatibility complex, class II, DM beta /// major histocompatibility complex, class II, DM beta"•HLA-DMB•Hs.1162•ENSG00000112091•"6955 // immune response // inferred from electronic annotation /// 9596 // detection of pest, pathogen or parasite // traceable author statement /// 19884 // antigen presentation, exogenous antigen // inferred from electronic annotation /// 19886 // antig"•16020 // membrane // inferred from electronic annotation /// 16021 // integral to membrane // inferred from electronic annotation•45012 // MHC class II receptor activity // inferred from electronic annotation

203845\_at•gb:AV727449 /DB\_XREF=gi:10836870 /DB\_XREF=AV727449 /CLONE=HTCAYG01 /FEA=FLmRNA /CNT=86 /TID=Hs.199061.0 /TIER=Stack /STK=25 /UG=Hs.199061 /LL=8850 /UG\_GENE=PCAF /UG\_TITLE=p300CBP-associated factor /FL=gb:NM\_003884.2 gb:U57317.2•0.372691509•0.293167749•p300/CBP-associated factor•PCAF•Hs.533055•ENSG00000114166•"6338 // chromatin remodeling // non-traceable author statement /// 6350 // transcription // inferred from electronic annotation /// 6355 // regulation of transcription, DNA-dependent // inferred from electronic annotation /// 6473 // protein amino acid ac"•5634 // nucleus // traceable author statement•3712 // transcription cofactor activity // inferred from physical interaction /// 4402 // histone acetyltransferase activity // inferred from electronic annotation /// 8080 // N-acetyltransferase activity // inferred from electronic annotation /// 16740 /

218039\_at•"gb:NM\_016359.1 /DB\_XREF=gi:7705950 /GEN=LOC51203 /FEA=FLmRNA /CNT=141 /TID=Hs.279905.0 /TIER=FL+Stack /STK=29 /UG=Hs.279905 /LL=51203 /DEF=Homo sapiens clone HQ0310 PRO0310p1 (LOC51203), mRNA. /PROD=clone HQ0310 PRO0310p1 /FL=gb:NM\_016359.1 gb:AF305711.1 "•0.372505532•0.451181342•nucleolar and spindle associated protein 1•NUSAP1•Hs.511093•ENSG00000137804••5634 // nucleus // inferred from electronic annotation•

217787\_s\_at•gb:AL525086 /DB\_XREF=gi:12788579 /DB\_XREF=AL525086 /CLONE=CS0DC005YC04 (3 prime) /FEA=FLmRNA /CNT=282 /TID=Hs.130181.0 /TIER=Stack /STK=18 /UG=Hs.130181 /LL=2590 /UG\_GENE=GALNT2 /UG\_TITLE=UDP-N-acetyl-alpha-D-galactosamine:polypeptide N-acetylgalactosamin"•0.370598092•0.232286231•UDP-N-acetyl-alpha-D-galactosamine:polypeptide N-acetylgalactosaminyltransferase 2 (GalNAc-T2)•GALNT2•Hs.300834•ENSG00000143641•6493 // O-linked glycosylation // traceable author statement•5794 // Golgi apparatus // inferred from electronic annotation /// 16021 // integral to membrane // inferred from electronic annotation"•4653 // polypeptide N-acetylgalactosaminyltransferase activity // traceable author statement /// 5529 // sugar binding // inferred from electronic annotation /// 16757 // transferase activity, transferring glycosyl groups // inferred from electronic annot"

209822\_s\_at•"gb:L22431.1 /DB\_XREF=gi:437386 /FEA=FLmRNA /CNT=57 /TID=Hs.73729.1 /TIER=FL+Stack /STK=23 /UG=Hs.73729 /LL=7436 /UG\_GENE=VLDLR /DEF=Human very low density lipoprotein receptor, complete cds. /PROD=very low density lipoprotein receptor /FL=gb:D16493.1 gb:N"•0.370071816•0.327683806•very low density lipoprotein receptor•VLDLR•Hs.370422•ENSG00000147852•6629 // lipid metabolism // inferred from electronic annotation /// 6869 // lipid transport // inferred from electronic annotation /// 6897 // endocytosis // inferred from electronic annotation /// 7165 // signal transduction // traceable author statement•5905

// coated pit // inferred from electronic annotation /// 16020 // membrane //  
inferred from electronic annotation /// 16021 // integral to membrane //  
inferred from electronic annotation•4872 // receptor activity // inferred  
from electronic annotation /// 5041 // low-density lipoprotein receptor  
activity // traceable author statement /// 5319 // lipid transporter activity  
// inferred from electronic annotation /// 5509 // calcium ion bind  
209289\_at•gb:AI700518 /DB\_XREF=gi:4988418 /DB\_XREF=we37d09.x1  
/CLONE=IMAGE:2343281 /FEA=FLmRNA /CNT=149 /TID=Hs.33287.1 /TIER=Stack /STK=42  
/UG=Hs.33287 /LL=4781 /UG\_GENE=NFIB /UG\_TITLE=nuclear factor IB  
/FL=gb:BC001283.1 gb:NM\_005596.1 gb:U85193.1•0.369999233•0.403082808•Nuclear  
factor I/B•NFIB•Hs.370359•ENSG00000147862•"6260 // DNA replication //  
inferred from electronic annotation /// 6350 // transcription // inferred  
from electronic annotation /// 6355 // regulation of transcription,  
DNA-dependent // inferred from electronic annotation"•5634 // nucleus //  
inferred from electronic annotation /// 5634 // nucleus // traceable author  
statement•3700 // transcription factor activity // inferred from electronic  
annotation /// 3700 // transcription factor activity // traceable author  
statement  
204451\_at•"gb:NM\_003505.1 /DB\_XREF=gi:4503824 /GEN=FZD1 /FEA=FLmRNA /CNT=64  
/TID=Hs.94234.0 /TIER=FL /STK=0 /UG=Hs.94234 /LL=8321 /DEF=Homo sapiens  
frizzled (Drosophila) homolog 1 (FZD1), mRNA. /PROD=frizzled 1  
/FL=gb:AB017363.1 gb:NM\_003505.1  
gb:AF072872.1"•0.369881163•0.419885961•frizzled homolog 1  
(Drosophila)•FZD1•Hs.94234•ENSG00000157240•7186 // G-protein coupled receptor  
protein signaling pathway // inferred from electronic annotation /// 7275 //  
development // inferred from electronic annotation /// 16055 // Wnt receptor  
signaling pathway // inferred from electronic annotation•16020 // membrane //  
inferred from electronic annotation /// 16021 // integral to membrane //  
inferred from electronic annotation•4926 // non-G-protein coupled 7TM  
receptor activity // inferred from electronic annotation /// 4930 //  
G-protein coupled receptor activity // inferred from electronic annotation  
203627\_at•gb:AI830698 /DB\_XREF=gi:5451454 /DB\_XREF=wj52f06.x1  
/CLONE=IMAGE:2406467 /FEA=FLmRNA /CNT=95 /TID=Hs.239176.0 /TIER=Stack /STK=11  
/UG=Hs.239176 /LL=3480 /UG\_GENE=IGF1R /UG\_TITLE=insulin-like growth factor 1  
receptor /FL=gb:NM\_000875.2•0.366260543•0.332987729•Insulin-like growth  
factor 1 receptor•IGF1R•Hs.20573•ENSG00000140443•74 // regulation of cell  
cycle // traceable author statement /// 6468 // protein amino acid  
phosphorylation // inferred from electronic annotation /// 6916 //  
anti-apoptosis // traceable author statement /// 7165 // signal transduction  
// traceable author•16020 // membrane // inferred from electronic annotation  
/// 16021 // integral to membrane // inferred from electronic annotation•4872  
// receptor activity // inferred from electronic annotation /// 5006 //  
epidermal growth factor receptor activity // inferred from electronic  
annotation /// 5010 // insulin-like growth factor receptor activity //  
traceable author statement /// 5515 //  
210982\_s\_at•"gb:M60333.1 /DB\_XREF=gi:188268 /GEN=HLA-DRA /FEA=FLmRNA /CNT=2  
/TID=Hs.76807.1 /TIER=FL /STK=0 /UG=Hs.76807 /LL=3122 /DEF=Human MHC class II  
HLA-DRA mRNA, complete cds. /PROD=MHC cell surface glycoprotein  
/FL=gb:M60333.1"•0.366195799•0.272812144•"major histocompatibility complex,  
class II, DR alpha"•HLA-DRA•Hs.520048•ENSG00000168423 //  
ENSG00000198334•"6955 // immune response // inferred from electronic  
annotation /// 6955 // immune response // non-traceable author statement ///  
19884 // antigen presentation, exogenous antigen // inferred from electronic  
annotation /// 19886 // antigen processing, exoge"•5887 // integral to plasma  
membrane // non-traceable author statement /// 16020 // membrane // inferred  
from electronic annotation /// 16021 // integral to membrane // inferred from  
electronic annotation•45012 // MHC class II receptor activity //  
non-traceable author statement  
210951\_x\_at•"gb:AF125393.1 /DB\_XREF=gi:5410356 /FEA=FLmRNA /CNT=2  
/TID=Hs.50477.2 /TIER=FL /STK=0 /UG=Hs.50477 /LL=5873 /UG\_GENE=RAB27A  
/DEF=Homo sapiens Rab27 isoform mRNA, complete cds. /PROD=Rab27 isoform  
/FL=gb:AF125393.1"•0.365996259•0.336271768•"RAB27A, member RAS oncogene  
family"•RAB27A•Hs.298651•ENSG00000069974•7264 // small GTPase mediated signal  
transduction // inferred from electronic annotation••3924 // GTPase activity  
// traceable author statement /// 5525 // GTP binding // inferred from  
electronic annotation  
212906\_at•gb:BE044440 /DB\_XREF=gi:8361493 /DB\_XREF=ho45e07.x1  
/CLONE=IMAGE:3040356 /FEA=mRNA /CNT=91 /TID=Hs.251278.0 /TIER=Stack /STK=29  
/UG=Hs.251278 /LL=57476 /UG\_GENE=KIAA1201 /UG\_TITLE=KIAA1201  
protein•0.36571003•0.175366957•KIAA1201  
protein•KIAA1201•Hs.144725•ENSG00000023171•••  
209355\_s\_at•"gb:AB000889.1 /DB\_XREF=gi:2467299 /FEA=FLmRNA /CNT=126  
/TID=Hs.331371.1 /TIER=FL+Stack /STK=8 /UG=Hs.331371 /LL=8613 /UG\_GENE=PPAP2B  
/DEF=Homo sapiens mRNA for phosphatidic acid phosphatase 2b, complete cds.  
/PROD=phosphatidic acid phosphatase 2b  
/FL=gb:A"•0.365618269•0.200966532•phosphatidic acid phosphatase type  
2B•PPAP2B•Hs.405156•ENSG00000162407•6629 // lipid metabolism // non-traceable  
author statement /// 8354 // germ cell migration // traceable author  
statement•16020 // membrane // traceable author statement /// 16021 //  
integral to membrane // inferred from electronic annotation•4721 //  
phosphoprotein phosphatase activity // traceable author statement /// 8195 //

phosphatidate phosphatase activity // inferred from electronic annotation ///  
16787 // hydrolase activity // inferred from electronic annotation  
221916\_at\*gb:BF055311 /DB\_XREF=gi:10809207 /DB\_XREF=7j78a07.x1  
/CLONE=IMAGE:3392532 /FEA=EST /CNT=58 /TID=Hs.302689.1 /TIER=Stack /STK=36  
/UG=Hs.302689 /LL=29951 /UG\_GENE=DKFZp434B0417 /UG\_TITLE=hypothetical  
protein\*0.364237476\*0.330228323\*"Neurofilament, light polypeptide  
68kDa"\*NEFL\*Hs.521461\*ENSG00000104725\*\*5882 // intermediate filament //  
inferred from electronic annotation /// 5883 // neurofilament // traceable  
author statement /// 30424 // axon // inferred from direct assay\*5198 //  
structural molecule activity // inferred from electronic annotation /// 5200  
// structural constituent of cytoskeleton // traceable author statement ///  
5515 // protein binding // inferred from physical interaction  
210538\_s\_at\*"gb:U37546.1 /DB\_XREF=gi:1145290 /GEN=MIHC /FEA=FLmRNA /CNT=5  
/TID=Hs.127799.2 /TIER=FL /STK=0 /UG=Hs.127799 /LL=330 /DEF=Human IAP homolog  
C (MIHC) mRNA, complete cds. /PROD=MIHC  
/FL=gb:U37546.1"\*0.364204914\*0.185080104\*baculoviral IAP repeat-containing  
3\*BIRC3\*Hs.127799\*ENSG00000023445\*6916 // anti-apoptosis // traceable author  
statement /// 7166 // cell surface receptor linked signal transduction //  
traceable author statement /// 16567 // protein ubiquitination // inferred  
from electronic annotation /// 42981 // regulation of apoptosis\*151 //  
ubiquitin ligase complex // inferred from electronic annotation\*4842 //  
ubiquitin-protein ligase activity // inferred from electronic annotation ///  
5515 // protein binding // inferred from electronic annotation /// 5515 //  
protein binding // non-traceable author statement /// 8270 // zinc ion  
binding // inferred from  
204151\_x\_at\*"gb:NM\_001353.2 /DB\_XREF=gi:5453542 /GEN=AKR1C1 /FEA=FLmRNA  
/CNT=107 /TID=Hs.306098.0 /TIER=FL+Stack /STK=25 /UG=Hs.306098 /LL=1645  
/DEF=Homo sapiens aldo-keto reductase family 1, member C1 (dihydrodiol  
dehydrogenase 1; 20-alpha (3-alpha)-hydroxysteroid  
de\*0.362659638\*0.250531157\*"aldo-keto reductase family 1, member C1  
(dihydrodiol dehydrogenase 1; 20-alpha (3-alpha)-hydroxysteroid  
dehydrogenase)"\*AKR1C1\*Hs.460260\*ENSG00000187134\*6805 // xenobiotic  
metabolism // traceable author statement\*5737 // cytoplasm // not  
recorded\*4033 // aldo-keto reductase activity // traceable author statement  
/// 5488 // binding // traceable author statement /// 5489 // electron  
transporter activity // not recorded /// 15125 // bile acid transporter  
activity // traceable author statement /// 47  
225056\_at\*"gb:AB037810.1 /DB\_XREF=gi:7243158 /GEN=KIAA1389 /FEA=mRNA /CNT=143  
/TID=Hs.18760.0 /TIER=Stack /STK=40 /UG=Hs.18760 /LL=57568 /DEF=Homo sapiens  
mRNA for KIAA1389 protein, partial cds. /PROD=KIAA1389  
protein"\*0.361641438\*0.104449867\*signal-induced proliferation-associated 1  
like 2\*SIPAL1L2\*Hs.268774\*ENSG00000116991\*\*5096 // GTPase activator activity  
// inferred from electronic annotation /// 5515 // protein binding //  
inferred from electronic annotation  
203303\_at\*"gb:NM\_006520.1 /DB\_XREF=gi:5730086 /GEN=TCTE1L /FEA=FLmRNA  
/CNT=110 /TID=Hs.75307.0 /TIER=FL+Stack /STK=29 /UG=Hs.75307 /LL=6990  
/DEF=Homo sapiens t-complex-associated-testis-expressed 1-like (TCTE1L),  
mRNA. /PROD=t-complex-associated-testis-expressed  
1-1"\*0.36151872\*0.312690591\*t-complex-associated-testis-expressed  
1-like\*TCTE1L\*Hs.446392\*ENSG00000165169\*\*\*  
219634\_at\*"gb:NM\_018413.1 /DB\_XREF=gi:8923757 /GEN=C4ST /FEA=FLmRNA /CNT=28  
/TID=Hs.287402.0 /TIER=FL /STK=0 /UG=Hs.287402 /LL=50515 /DEF=Homo sapiens  
chondroitin 4-sulfotransferase (C4ST), mRNA. /PROD=chondroitin  
4-sulfotransferase /FL=gb:AB042326.1 gb:NM\_018413.1  
\*0.360620317\*0.18772636\*carbohydrate (chondroitin 4) sulfotransferase  
11\*CHST11\*Hs.546386\*ENSG00000171310\*5975 // carbohydrate metabolism //  
inferred from electronic annotation /// 30206 // chondroitin sulfate  
biosynthesis // inferred from direct assay\*5794 // Golgi apparatus //  
inferred from electronic annotation /// 16021 // integral to membrane //  
non-traceable author statement\*1537 // N-acetylgalactosamine  
4-O-sulfotransferase activity // inferred from direct assay /// 16740 //  
transferase activity // inferred from electronic annotation /// 47756 //  
chondroitin 4-sulfotransferase activity // inferred from direct assay  
211506\_s\_at\*"gb:AF043337.1 /DB\_XREF=gi:12641914 /GEN=IL8 /FEA=FLmRNA /CNT=1  
/TID=Hs.624.1 /TIER=FL /STK=0 /UG=Hs.624 /LL=3576 /DEF=Homo sapiens  
interleukin 8 C-terminal variant (IL8) mRNA, complete cds. /PROD=interleukin  
8 C-terminal variant /FL=gb:AF043337.1"\*0.3600904\*0.357918713\*interleukin  
8\*IL8\*Hs.624\*ENSG00000169429\*1525 // angiogenesis // traceable author  
statement /// 6928 // cell motility // traceable author statement /// 6935 //  
chemotaxis // traceable author statement /// 7050 // cell cycle arrest //  
inferred from direct assay /// 7186 // G-protein coupled recep\*5615 //  
extracellular space // traceable author statement /// 5625 // soluble  
fraction // traceable author statement\*5153 // interleukin-8 receptor binding  
// inferred from physical interaction /// 5515 // protein binding // inferred  
from physical interaction /// 8009 // chemokine activity // traceable author  
statement  
228523\_at\*gb:AW970089 /DB\_XREF=gi:8159934 /DB\_XREF=EST382170 /FEA=EST /CNT=36  
/TID=Hs.284136.6 /TIER=ConsEnd /STK=0 /UG=Hs.284136 /LL=29029  
/UG\_GENE=PRO2047 /UG\_TITLE=PRO2047 protein\*0.359505681\*0.324154224\*nanos  
homolog 1 (Drosophila)\*NANOS1\*Hs.351851\*ENSG00000188613\*6445 // regulation of  
translation // inferred from electronic annotation\*\*3723 // RNA binding //

inferred from electronic annotation /// 8270 // zinc ion binding // inferred from electronic annotation  
217744\_s\_at•"gb:NM\_022121.1 /DB\_XREF=gi:11545842 /GEN=PIGPC1 /FEA=FLmRNA /CNT=376 /TID=Hs.303125.0 /TIER=FL /STK=6 /UG=Hs.303125 /LL=64065 /DEF=Homo sapiens p53-induced protein PIGPC1 (PIGPC1), mRNA. /PROD=p53-induced protein PIGPC1 /FL=gb:AF317550.1 gb:NM\_022121.1"•0.359079846•0.450540062•"PERP, TP53 apoptosis effector"•PERP•Hs.520421•ENSG00000112378••16021 // integral to membrane // inferred from electronic annotation•  
220230\_s\_at•"gb:NM\_016229.1 /DB\_XREF=gi:7706442 /GEN=LOC51700 /FEA=FLmRNA /CNT=9 /TID=Hs.22142.0 /TIER=FL /STK=5 /UG=Hs.22142 /LL=51700 /DEF=Homo sapiens cytochrome b5 reductase b5R.2 (LOC51700), mRNA. /PROD=cytochrome b5 reductase b5R.2 /FL=gb:AF169802.1 gb:NM\_016229"•0.358765735•0.380932092•cytochrome b5 reductase b5R.2•CYB5R2•Hs.414362•ENSG00000166394•6118 // electron transport // inferred from direct assay /// 6118 // electron transport // inferred from electronic annotation /// 6695 // cholesterol biosynthesis // inferred from electronic annotation•5625 // soluble fraction // non-traceable author statement /// 5783 // endoplasmic reticulum // inferred from electronic annotation /// 16020 // membrane // inferred from direct assay•4128 // cytochrome-b5 reductase activity // inferred from direct assay /// 16491 // oxidoreductase activity // inferred from electronic annotation  
220425\_x\_at•"gb:NM\_017578.1 /DB\_XREF=gi:13487901 /GEN=DKFZp434B1222 /FEA=FLmRNA /CNT=6 /TID=Hs.194093.0 /TIER=FL /STK=2 /UG=Hs.194093 /LL=54763 /DEF=Homo sapiens AKAP-binding sperm protein ropporin (DKFZp434B1222), mRNA. /PROD=AKAP-binding sperm protein ropporin /FL=g"•0.355847735•0.147364415•"ropporin, rhophilin associated protein 1B"•ROPN1B•Hs.528203•ENSG00000114547•910 // cytokinesis // non-traceable author statement /// 7165 // signal transduction // inferred from electronic annotation /// 7266 // Rho protein signal transduction // traceable author statement /// 7283 // spermatogenesis // non-traceable author state•5737 // cytoplasm // inferred from direct assay /// 16021 // integral to membrane // inferred from electronic annotation /// 19861 // flagellum // inferred from direct assay /// 19867 // outer membrane // inferred from electronic annotation•8603 // cAMP-dependent protein kinase regulator activity // inferred from electronic annotation /// 15288 // porin activity // inferred from electronic annotation /// 30159 // receptor signaling complex scaffold activity // non-traceable author statement  
205190\_at•"gb:NM\_002670.1 /DB\_XREF=gi:4505896 /GEN=PLS1 /FEA=FLmRNA /CNT=45 /TID=Hs.430.0 /TIER=FL+Stack /STK=14 /UG=Hs.430 /LL=5357 /DEF=Homo sapiens plastin 1 (I isoform) (PLS1), mRNA. /PROD=plastin 1 /FL=gb:NM\_002670.1 gb:L20826.1"•0.355773112•0.457937763•plastin 1 (I isoform)•PLS1•Hs.203637•ENSG00000120756••5903 // brush border // not recorded /// 15629 // actin cytoskeleton // not recorded•5200 // structural constituent of cytoskeleton // traceable author statement /// 5509 // calcium ion binding // inferred from electronic annotation /// 51015 // actin filament binding // traceable author statement  
219073\_s\_at•"gb:NM\_017784.1 /DB\_XREF=gi:8923336 /GEN=FLJ20363 /FEA=FLmRNA /CNT=56 /TID=Hs.321622.0 /TIER=FL+Stack /STK=12 /UG=Hs.321622 /LL=54907 /DEF=Homo sapiens hypothetical protein FLJ20363 (FLJ20363), mRNA. /PROD=hypothetical protein FLJ20363 /FL=gb:NM\_017784.1 g"•0.355458045•0.331875791•oxysterol binding protein-like 10•OSBPL10•Hs.150122•ENSG00000144645•6869 // lipid transport // inferred from electronic annotation /// 8202 // steroid metabolism // inferred from electronic annotation••  
231808\_at•gb:AY007106.1 /DB\_XREF=gi:9955998 /FEA=mRNA /CNT=64 /TID=Hs.16773.2 /TIER=ConsEnd /STK=0 /UG=Hs.16773 /UG\_TITLE=Homo sapiens clone TCCCIA00427 mRNA sequence /DEF=Homo sapiens clone TCCCIA00427 mRNA sequence. •0.355034279•0.301639408•keratin associated protein 4-7•KRTAP4-7•Hs.380164•••45095 // keratin filament // inferred from electronic annotation•  
201309\_x\_at•"gb:U36189.1 /DB\_XREF=gi:1244509 /GEN=hP311 /FEA=FLmRNA /CNT=470 /TID=Hs.142827.0 /TIER=FL /STK=0 /UG=Hs.142827 /LL=9315 /DEF=Human p311 protein (hP311) mRNA, complete cds. /PROD=p311 protein /FL=gb:U30521.1 gb:NM\_004772.1 gb:U36189.1"•0.354112437•0.256627831•chromosome 5 open reading frame 13•C5orf13•Hs.483067•ENSG00000134986•••  
219521\_at•"gb:NM\_018644.1 /DB\_XREF=gi:12408651 /GEN=B3GAT1 /FEA=FLmRNA /CNT=55 /TID=Hs.3353.0 /TIER=FL+Stack /STK=15 /UG=Hs.3353 /LL=27087 /DEF=Homo sapiens beta-1,3-glucuronyltransferase 1 (glucuronosyltransferase P) (B3GAT1), mRNA. /PROD=beta-1,3-glucuronyltransfe"•0.352706643•0.290207334•"beta-1,3-glucuronyl transferase 1 (glucuronosyltransferase P)"•B3GAT1•Hs.381050•ENSG00000109956•5975 // carbohydrate metabolism // traceable author statement /// 6486 // protein amino acid glycosylation // not recorded•5794 // Golgi apparatus // inferred from electronic annotation /// 16020 // membrane // inferred from electronic annotation /// 16021 // integral to membrane // traceable author statement•15018 // galactosylgalactosylxylosylprotein 3-beta-glucuronosyltransferase activity // inferred from electronic annotation /// 16740 // transferase activity // inferred from electronic annotation /// 30145 // manganese ion binding // inferred from electro  
209493\_at•"gb:AF338650.1 /DB\_XREF=gi:12751451 /GEN=AIPC /FEA=FLmRNA /CNT=154

/TID=Hs.173035.0 /TIER=FL+Stack /STK=56 /UG=Hs.173035 /LL=23037 /DEF=Homo sapiens PDZ domain-containing protein AIPC (AIPC) mRNA, complete cds.  
/PROD=PDZ domain-containing protein AIPC /FL="\*0.351692658\*0.498600114\*PDZ domain containing 3\*PDZK3\*Hs.481819\*ENSG00000133401\*7155 // cell adhesion // inferred from electronic annotation\*5576 // extracellular region // inferred from sequence or structural similarity /// 5634 // nucleus // inferred from sequence or structural similarity /// 5783 // endoplasmic reticulum // inferred from sequence or structural similarity /// 5911 // interce\*5198 // structural molecule activity // inferred from electronic annotation /// 5515 // protein binding // inferred from sequence or structural similarity 216874\_at\*gb:U80770.1 /DB\_XREF=gi:2921608 /FEA=mRNA /CNT=1 /TID=Hs.42192.1 /TIER=ConsEnd /STK=0 /UG=Hs.42192 /UG\_TITLE=Human EST clone 251800 mariner transposon Hsmar1 sequence /DEF=Human EST clone 251800 mariner transposon Hsmar1 sequence.\*0.350547892\*0.347848143\*"Homo sapiens, clone IMAGE:5538654, mRNA"\*Hs.546989\*  
1554014\_at\*"gb:BC007347.1 /DB\_XREF=gi:13938415 /TID=Hs2.36787.2 /CNT=14 /FEA=FLmRNA /TIER=FL /STK=7 /LL=1106 /UG\_GENE=CHD2 /UG=Hs.36787 /DEF=Homo sapiens, clone MGC:1566 IMAGE:3050321, mRNA, complete cds. /PROD=Unknown (protein for MGC:1566) /FL=gb:BC007347.1  
gb:BC02"\*0.350414011\*0.477254353\*chromodomain helicase DNA binding protein 2\*CHD2\*Hs.546244\*ENSG00000173575\*6333 // chromatin assembly or disassembly // inferred from electronic annotation /// 6357 // regulation of transcription from RNA polymerase II promoter // traceable author statement /// 7001 // chromosome organization and biogenesis (sensu Eukaryota) // \*785 // chromatin // inferred from electronic annotation /// 5634 // nucleus // inferred from electronic annotation\*3682 // chromatin binding // inferred from electronic annotation /// 4003 // ATP-dependent DNA helicase activity // traceable author statement /// 4386 // helicase activity // inferred from electronic annotation /// 5524 // ATP binding // inferred from el  
204955\_at\*"gb:NM\_006307.1 /DB\_XREF=gi:5454085 /GEN=SRPX /FEA=FLmRNA /CNT=73 /TID=Hs.15154.0 /TIER=FL+Stack /STK=37 /UG=Hs.15154 /LL=8406 /DEF=Homo sapiens sushi-repeat-containing protein, X chromosome (SRPX), mRNA.  
/PROD=sushi-repeat-containing protein, X chromosome"\*0.349602813\*0.412023628\*"sushi-repeat-containing protein, X-linked"\*SRPX\*Hs.15154\*ENSG00000101955\*7155 // cell adhesion // inferred from electronic annotation\*16020 // membrane // traceable author statement\*5515 // protein binding // inferred from electronic annotation 209288\_s\_at\*gb:AL136842.1 /DB\_XREF=gi:6807668 /GEN=DKFZp434A0530 /FEA=FLmRNA /CNT=172 /TID=Hs.260024.0 /TIER=FL /STK=0 /UG=Hs.260024 /LL=10602 /DEF=Homo sapiens mRNA; cDNA DKFZp434A0530 (from clone DKFZp434A0530); complete cds. /PROD=hypothetical protein /FL=gb:AF164\*0.348909769\*0.326303541\*CDC42 effector protein (Rho GTPase binding)  
3\*CDC42EP3\*Hs.369574\*ENSG00000163171\*7165 // signal transduction // traceable author statement\*5519 // cytoskeletal regulatory protein binding // traceable author statement  
207739\_s\_at\*"gb:NM\_001472.1 /DB\_XREF=gi:4503878 /GEN=GAGE2 /FEA=FLmRNA /CNT=3 /TID=Hs.278444.0 /TIER=FL /STK=0 /UG=Hs.278444 /LL=2574 /DEF=Homo sapiens G antigen 2 (GAGE2), mRNA. /PROD=G antigen 2 /FL=gb:U19143.1  
gb:NM\_001472.1"\*0.348051267\*0.457391181\*G antigen 1 /// G antigen 2 /// G antigen 3 /// G antigen 4 /// G antigen 5 /// G antigen 6 /// G antigen 7 /// G antigen 7B /// G antigen 8\*GAGE1 /// GAGE2 /// GAGE3 /// GAGE4 /// GAGE5 /// GAGE6 /// GAGE7 /// GAGE7B /// GAGE8\*Hs.278606\*ENSG00000068990 /// ENSG00000189064 /// ENSG00000198716\*6968 // cellular defense response // traceable author statement /// 6968 // cellular defense response // traceable author statement\*  
205860\_x\_at\*"gb:NM\_004476.1 /DB\_XREF=gi:4758397 /GEN=FOLH1 /FEA=FLmRNA /CNT=34 /TID=Hs.1915.0 /TIER=FL+Stack /STK=16 /UG=Hs.1915 /LL=2346 /DEF=Homo sapiens folate hydrolase (prostate-specific membrane antigen) 1 (FOLH1), mRNA. /PROD=folate hydrolase (prostate-specific"\*0.347668243\*0.294365976\*folate hydrolase (prostate-specific membrane antigen) 1\*FOLH1\*Hs.380325\*ENSG00000086205\*6508 // proteolysis and peptidolysis // non-traceable author statement\*5624 // membrane fraction // traceable author statement /// 5887 // integral to plasma membrane // traceable author statement /// 16020 // membrane // non-traceable author statement\*4180 // carboxypeptidase activity // inferred from electronic annotation /// 8237 // metallopeptidase activity // inferred from electronic annotation /// 16805 // dipeptidase activity // inferred from electronic annotation /// 43275 // glutamate carboxype  
227059\_at\*gb:AI651255 /DB\_XREF=gi:4735234 /DB\_XREF=wa98e07.x1 /CLONE=IMAGE:2304228 /FEA=EST /CNT=45 /TID=Hs.75113.2 /TIER=Stack /STK=37 /UG=Hs.75113 /LL=2971 /UG\_GENE=GTF3A /UG\_TITLE=general transcription factor IIIA\*0.347276172\*0.478393655\*Glypican 6\*GPC6\*Hs.444329\*ENSG00000183098\*5578 // extracellular matrix (sensu Metazoa) // inferred from electronic annotation /// 5887 // integral to plasma membrane // traceable author statement /// 16020 // membrane // inferred from electronic annotation\* 235911\_at\*gb:AI885815 /DB\_XREF=gi:5590979 /DB\_XREF=wl61h04.x1 /CLONE=IMAGE:2429431 /FEA=EST /CNT=8 /TID=Hs.184727.0 /TIER=ConsEnd /STK=7 /UG=Hs.184727 /UG\_TITLE=ESTs\*0.346341717\*0.316212713\*Hypothetical gene supported by BC034933; BC068085\*Hs.552645\*  
204698\_at\*"gb:NM\_002201.2 /DB\_XREF=gi:6857799 /GEN=ISG20 /FEA=FLmRNA /CNT=51 /TID=Hs.183487.0 /TIER=FL+Stack /STK=21 /UG=Hs.183487 /LL=3669 /DEF=Homo

sapiens interferon stimulated gene (20kD) (ISG20), mRNA. /PROD=interferon stimulated gene (20kD) /FL=gb:U88964.1  
gb:"\*0.346247733\*0.324685004\*interferon stimulated gene  
20kDa\*ISG20\*Hs.459265\*ENSG00000172183\*"738 // DNA catabolism, exonucleolytic  
// inferred from direct assay /// 6401 // RNA catabolism // inferred from  
direct assay /// 8283 // cell proliferation // traceable author statement ///  
9615 // response to virus // inferred from direct assay"\*5654 // nucleoplasm  
// traceable author statement /// 16605 // PML body // inferred from direct  
assay\*175 // 3'-5'-exoribonuclease activity // inferred from direct assay ///  
3723 // RNA binding // inferred from electronic annotation /// 4527 //  
exonuclease activity // inferred from electronic annotation /// 8310 //  
single-stranded DNA specific 3'-5' exode  
218804\_at\*"gb:NM\_018043.1 /DB\_XREF=gi:8922319 /GEN=FLJ10261 /FEA=FLmRNA  
/CNT=83 /TID=Hs.26176.0 /TIER=FL /STK=5 /UG=Hs.26176 /LL=55107 /DEF=Homo  
sapiens hypothetical protein FLJ10261 (FLJ10261), mRNA. /PROD=hypothetical  
protein FLJ10261 /FL=gb:NM\_018043.1"\*0.345593338\*0.432629408\*transmembrane  
protein 16A\*TMEM16A\*Hs.503074\*ENSG00000131620\*\*\*  
201162\_at\*"gb:NM\_001553.1 /DB\_XREF=gi:4504618 /GEN=IGFBP7 /FEA=FLmRNA  
/CNT=409 /TID=Hs.119206.0 /TIER=FL+Stack /STK=157 /UG=Hs.119206 /LL=3490  
/DEF=Homo sapiens insulin-like growth factor binding protein 7 (IGFBP7),  
mRNA. /PROD=insulin-like growth factor binding  
pro"\*0.342326531\*0.499391894\*insulin-like growth factor binding protein  
7\*IGFBP7\*Hs.479808\*ENSG00000163453\*1558 // regulation of cell growth //  
inferred from electronic annotation /// 8285 // negative regulation of cell  
proliferation // traceable author statement\*5576 // extracellular region //  
inferred from electronic annotation\*5520 // insulin-like growth factor  
binding // inferred from electronic annotation  
207275\_s\_at\*"gb:NM\_001995.1 /DB\_XREF=gi:4503650 /GEN=FACL1 /FEA=FLmRNA /CNT=5  
/TID=Hs.278333.0 /TIER=FL /STK=0 /UG=Hs.278333 /LL=2179 /DEF=Homo sapiens  
fatty-acid-Coenzyme A ligase, long-chain 1 (FACL1), nuclear gene encoding  
mitochondrial protein, mRNA. /PROD=long-ch"\*0.34226572\*0.390259071\*acyl-CoA  
synthetase long-chain family member 1\*ACSL1\*Hs.406678\*ENSG00000151726\*6629 //  
lipid metabolism // inferred from electronic annotation /// 6631 // fatty  
acid metabolism // not recorded /// 7586 // digestion // traceable author  
statement /// 8152 // metabolism // inferred from electronic annotation\*16021  
// integral to membrane // inferred from electronic annotation\*287 //  
magnesium ion binding // inferred from electronic annotation /// 4467 //  
long-chain-fatty-acid-CoA ligase activity // traceable author statement ///  
16874 // ligase activity // inferred from electronic annotation  
228863\_at\*"gb:N69091 /DB\_XREF=gi:1225252 /DB\_XREF=yz60e11.s1  
/CLONE=IMAGE:287468 /FEA=EST /CNT=15 /TID=Hs.12268.0 /TIER=Stack /STK=12  
/UG=Hs.12268 /UG\_TITLE=ESTs\*0.341732229\*0.272482417\*Hypothetical protein  
LOC144997\*PCDH17\*Hs.106511\*ENSG00000118946\*7155 // cell adhesion // inferred  
from electronic annotation /// 7156 // homophilic cell adhesion // inferred  
from electronic annotation\*16020 // membrane // inferred from electronic  
annotation\*5509 // calcium ion binding // inferred from electronic annotation  
/// 5515 // protein binding // inferred from electronic annotation  
206026\_s\_at\*"gb:NM\_007115.1 /DB\_XREF=gi:6005905 /GEN=TNFAIP6 /FEA=FLmRNA  
/CNT=25 /TID=Hs.29352.0 /TIER=FL /STK=0 /UG=Hs.29352 /LL=7130 /DEF=Homo  
sapiens tumor necrosis factor, alpha-induced protein 6 (TNFAIP6), mRNA.  
/PROD=tumor necrosis factor, alpha-induced protein  
"\*0.34111468\*0.323464224\*"tumor necrosis factor, alpha-induced protein  
6"\*TNFAIP6\*Hs.437322\*ENSG00000123610\*6954 // inflammatory response //  
traceable author statement /// 7155 // cell adhesion // inferred from  
electronic annotation /// 7165 // signal transduction // traceable author  
statement /// 7267 // cell-cell signaling // traceable author statement\*5576  
// extracellular region // not recorded\*5515 // protein binding // inferred  
from electronic annotation /// 5540 // hyaluronic acid binding // traceable  
author statement  
202644\_s\_at\*"gb:NM\_006290.1 /DB\_XREF=gi:5454131 /GEN=TNFAIP3 /FEA=FLmRNA  
/CNT=151 /TID=Hs.211600.0 /TIER=FL+Stack /STK=55 /UG=Hs.211600 /LL=7128  
/DEF=Homo sapiens tumor necrosis factor, alpha-induced protein 3 (TNFAIP3),  
mRNA. /PROD=tumor necrosis factor,  
alpha-induce"\*0.341055608\*0.212819576\*"tumor necrosis factor, alpha-induced  
protein 3"\*TNFAIP3\*Hs.211600\*ENSG00000118503\*6512 // ubiquitin cycle //  
inferred from electronic annotation /// 6915 // apoptosis // non-traceable  
author statement /// 6916 // anti-apoptosis // non-traceable author statement  
/// 16481 // negative regulation of transcription // non-traceable author  
s\*5634 // nucleus // non-traceable author statement\*3677 // DNA binding //  
inferred from electronic annotation /// 5515 // protein binding //  
non-traceable author statement /// 8234 // cysteine-type peptidase activity  
// inferred from electronic annotation /// 8270 // zinc ion binding //  
inferred from elec  
218113\_at\*"gb:NM\_013390.1 /DB\_XREF=gi:7019554 /GEN=TMEM2 /FEA=FLmRNA /CNT=123  
/TID=Hs.160417.0 /TIER=FL+Stack /STK=11 /UG=Hs.160417 /LL=23670 /DEF=Homo  
sapiens transmembrane protein 2 (TMEM2), mRNA. /PROD=transmembrane protein 2  
/FL=gb:AF137030.1 gb:NM\_013390.1"\*0.340755884\*0.303198801\*transmembrane  
protein 2\*TMEM2\*Hs.494146\*ENSG00000135048\*\*16021 // integral to membrane //  
traceable author statement\*  
213032\_at\*"gb:AI186739 /DB\_XREF=gi:3737377 /DB\_XREF=qe79c01.x1  
/CLONE=IMAGE:1745184 /FEA=mRNA /CNT=97 /TID=Hs.326416.0 /TIER=Stack /STK=16



/UG=Hs.326416 /UG\_TITLE=Homo sapiens mRNA; cDNA DKFZp564H1916 (from clone DKFZp564H1916)•0.338828605•0.306483063•Nuclear factor I/B•NFIB•Hs.370359•ENSG00000147862•"6260 // DNA replication // inferred from electronic annotation /// 6350 // transcription // inferred from electronic annotation /// 6355 // regulation of transcription, DNA-dependent // inferred from electronic annotation"•5634 // nucleus // inferred from electronic annotation /// 5634 // nucleus // traceable author statement•3700 // transcription factor activity // inferred from electronic annotation /// 3700 // transcription factor activity // traceable author statement  
231738\_at•"gb:NM\_018940.1 /DB\_XREF=gi:11036655 /GEN=PCDHB7 /FEA=FLmRNA /CNT=7 /TID=Hs.203830.0 /TIER=FL /STK=3 /UG=Hs.203830 /LL=56129 /DEF=Homo sapiens protocadherin beta 7 (PCDHB7), mRNA. /PROD=protocadherin beta 7 /FL=gb:NM\_018940.1 gb:AF152500.1"•0.338366396•0.342126918•protocadherin beta 7•PCDHB7•Hs.203830•ENSG00000113212•7155 // cell adhesion // inferred from electronic annotation /// 7156 // homophilic cell adhesion // inferred from electronic annotation /// 16339 // calcium-dependent cell-cell adhesion // non-traceable author statement•16020 // membrane // inferred from electronic annotation /// 16021 // integral to membrane // Unknown•5509 // calcium ion binding // Unknown /// 5515 // protein binding // inferred from electronic annotation  
212956\_at•gb:AI348094 /DB\_XREF=gi:4085300 /DB\_XREF=qp61g12.x1 /CLONE=IMAGE:1927558 /FEA=mRNA /CNT=71 /TID=Hs.90419.0 /TIER=Stack /STK=21 /UG=Hs.90419 /LL=23158 /UG\_GENE=KIAA0882 /UG\_TITLE=KIAA0882 protein•0.33777808•0.469652941•KIAA0882 protein•KIAA0882•Hs.480819•ENSG00000109436•••5509 // calcium ion binding // inferred from electronic annotation  
235775\_at•gb:AI765006 /DB\_XREF=gi:5231515 /DB\_XREF=wh56a08.x1 /CLONE=IMAGE:2384726 /FEA=EST /CNT=9 /TID=Hs.145014.0 /TIER=ConsEnd /STK=5 /UG=Hs.145014 /UG\_TITLE=ESTs•0.337510372•0.347833519•hypothetical protein DKFZp762A217•DKFZp762A217•Hs.444240•ENSG00000179104•••5488 // binding // inferred from electronic annotation  
203607\_at•"gb:NM\_014937.1 /DB\_XREF=gi:7662413 /GEN=KIAA0966 /FEA=FLmRNA /CNT=103 /TID=Hs.52463.0 /TIER=FL+Stack /STK=37 /UG=Hs.52463 /LL=22876 /DEF=Homo sapiens KIAA0966 protein (KIAA0966), mRNA. /PROD=KIAA0966 protein /FL=gb:AB023183.1 gb:NM\_014937.1 gb:AF113227.1"•0.335320835•0.350032006•inositol polyphosphate-5-phosphatase F•INPP5F•Hs.369755•ENSG00000198825•••  
33304\_at•"Cluster Incl. U88964:Human HEM45 mRNA, complete cds /cds=(37,582) /gb=U88964 /gi=2062679 /ug=Hs.183487 /len=701"•0.335312814•0.35206473•interferon stimulated gene  
20kDa•ISG20•Hs.459265•ENSG00000172183•"738 // DNA catabolism, exonucleolytic // inferred from direct assay /// 6401 // RNA catabolism // inferred from direct assay /// 8283 // cell proliferation // traceable author statement /// 9615 // response to virus // inferred from direct assay"•5654 // nucleoplasm // traceable author statement /// 16605 // PML body // inferred from direct assay•175 // 3'-5'-exoribonuclease activity // inferred from direct assay /// 3723 // RNA binding // inferred from electronic annotation /// 4527 // exonuclease activity // inferred from electronic annotation /// 8310 // single-stranded DNA specific 3'-5' exode  
201666\_at•"gb:NM\_003254.1 /DB\_XREF=gi:4507508 /GEN=TIMP1 /FEA=FLmRNA /CNT=282 /TID=Hs.5831.0 /TIER=FL+Stack /STK=220 /UG=Hs.5831 /LL=7076 /DEF=Homo sapiens tissue inhibitor of metalloproteinase 1 (erythroid potentiating activity, collagenase inhibitor) (TIMP1), mRNA"•0.332816101•0.318693098•"tissue inhibitor of metalloproteinase 1 (erythroid potentiating activity, collagenase inhibitor)"•TIMP1•Hs.522632•ENSG00000102265•7275 // development // not recorded /// 8284 // positive regulation of cell proliferation // traceable author statement /// 51045 // negative regulation of membrane protein ectodomain proteolysis // inferred from direct assay•5578 // extracellular matrix (sensu Metazoa) // inferred from electronic annotation•4857 // enzyme inhibitor activity // inferred from electronic annotation /// 8191 // metalloendopeptidase inhibitor activity // inferred from direct assay  
208812\_x\_at•"gb:BC004489.1 /DB\_XREF=gi:13325360 /FEA=FLmRNA /CNT=490 /TID=Hs.277477.0 /TIER=FL+Stack /STK=335 /UG=Hs.277477 /LL=3107 /UG\_GENE=HLA-C /DEF=Homo sapiens, major histocompatibility complex, class I, C, clone MGC:11039, mRNA, complete cds. /PROD=major histoc"•0.331251899•0.320048567•"major histocompatibility complex, class I, C"•HLA-C•Hs.534125•ENSG00000198479•"19882 // antigen presentation // inferred from electronic annotation /// 19883 // antigen presentation, endogenous antigen // inferred from electronic annotation /// 19885 // antigen processing, endogenous antigen via MHC class I // inferred from electron"•5887 // integral to plasma membrane // non-traceable author statement /// 16020 // membrane // non-traceable author statement /// 16021 // integral to membrane // inferred from electronic annotation /// 42612 // MHC class I protein complex // inferred fro•30106 // MHC class I receptor activity // inferred from electronic annotation /// 30106 // MHC class I receptor activity // non-traceable author statement /// 45012 // MHC class II receptor activity // non-traceable author statement  
207281\_x\_at•"gb:NM\_016378.1 /DB\_XREF=gi:7706758 /GEN=VCX-2r /FEA=FLmRNA /CNT=13 /TID=Hs.279737.0 /TIER=FL+Stack /STK=10 /UG=Hs.279737 /LL=51480 /DEF=Homo sapiens variable charge protein on X with two repeats (VCX-2r),

mRNA. /PROD=variable charge protein on X with two  
"0.330924745\*0.184259314\*"variable charge, X-linked /// variable charge,  
X-linked 2 /// variable charge, X-linked 3A /// variably charged X-C"VCX ///  
VCX2 /// VCX3A /// VCX-C\*Hs.278906\*ENSG00000182583 /// ENSG00000177504 ///  
ENSG00000169059\*6325 // establishment and/or maintenance of chromatin  
architecture // traceable author statement /// 7283 // spermatogenesis //  
inferred from expression pattern /// 42255 // ribosome assembly //  
non-traceable author statement /// 6325 // establishment and\*5730 //  
nucleolus // inferred from expression pattern /// 5730 // nucleolus //  
inferred from sequence or structural similarity\*3682 // chromatin binding //  
traceable author statement /// 5515 // protein binding // non-traceable  
author statement /// 3682 // chromatin binding // inferred from sequence or  
structural similarity /// 5515 // protein binding // inferred from sequence  
or  
204749\_at\*"gb:NM\_004538.1 /DB\_XREF=gi:4758757 /GEN=NAP1L3 /FEA=FLmRNA /CNT=71  
/TID=Hs.21365.0 /TIER=FL+Stack /STK=32 /UG=Hs.21365 /LL=4675 /DEF=Homo  
sapiens nucleosome assembly protein 1-like 3 (NAP1L3), mRNA. /PROD=nucleosome  
assembly protein 1-like 3 /FL=gb:NM\_004"0.330293751\*0.350791122\*nucleosome  
assembly protein 1-like 3\*NAP1L3\*Hs.21365\*ENSG00000186310\*6334 // nucleosome  
assembly // traceable author statement\*5634 // nucleus // inferred from  
electronic annotation /// 5678 // chromatin assembly complex // traceable  
author statement\*  
229893\_at\*"gb:BF589413 /DB\_XREF=gi:11681737 /DB\_XREF=nab26b11.x1  
/CLONE=IMAGE:3267020 /FEA=EST /CNT=22 /TID=Hs.55501.0 /TIER=Stack /STK=17  
/UG=Hs.55501 /UG\_TITLE=ESTs\*0.330275529\*0.273880769\*FERM domain containing  
3\*FRMD3\*Hs.127535\*ENSG00000172159\*8152 // metabolism // inferred from  
electronic annotation\*5737 // cytoplasm // inferred from electronic  
annotation /// 5856 // cytoskeleton // inferred from electronic annotation  
/// 16020 // membrane // inferred from electronic annotation\*287 // magnesium  
ion binding // inferred from electronic annotation /// 5488 // binding //  
inferred from electronic annotation /// 8092 // cytoskeletal protein binding  
// inferred from electronic annotation /// 16462 // pyrophosphatase activity  
// inferre  
206508\_at\*"gb:NM\_001252.1 /DB\_XREF=gi:4507604 /GEN=TNFSF7 /FEA=FLmRNA /CNT=19  
/TID=Hs.99899.0 /TIER=FL /STK=1 /UG=Hs.99899 /LL=970 /DEF=Homo sapiens tumor  
necrosis factor (ligand) superfamily, member 7 (TNFSF7), mRNA. /PROD=CD70  
antigen (CD27 ligand) /FL=gb:NM\_00125"0.329885903\*0.347688001\*"tumor  
necrosis factor (ligand) superfamily, member  
7"\*TNFSF7\*Hs.501497\*ENSG00000125726\*6915 // apoptosis // not recorded ///  
6955 // immune response // inferred from electronic annotation /// 7165 //  
signal transduction // traceable author statement /// 7267 // cell-cell  
signaling // traceable author statement /// 8283 // cell proliferation\*5887  
// integral to plasma membrane // traceable author statement /// 16020 //  
membrane // inferred from electronic annotation\*5164 // tumor necrosis factor  
receptor binding // inferred from electronic annotation  
205334\_at\*"gb:NM\_006271.1 /DB\_XREF=gi:5454031 /GEN=S100A1 /FEA=FLmRNA /CNT=73  
/TID=Hs.292707.0 /TIER=FL+Stack /STK=14 /UG=Hs.292707 /LL=6271 /DEF=Homo  
sapiens S100 calcium-binding protein A1 (S100A1), mRNA. /PROD=S100  
calcium-binding protein A1 /FL=gb:NM\_006271.1"0.329447163\*0.126082802\*S100  
calcium binding protein A1\*S100A1\*Hs.515715\*ENSG00000160678\*7154 // cell  
communication // not recorded /// 7242 // intracellular signaling cascade //  
not recorded /// 7399 // neurogenesis // not recorded\*5509 // calcium ion  
binding // non-traceable author statement /// 5515 // protein binding //  
inferred from physical interaction /// 8270 // zinc ion binding //  
non-traceable author statement  
226189\_at\*"gb:BF513121 /DB\_XREF=gi:11598300  
/DB\_XREF=UI-H-BW1-amn-g-04-0-UI.s1 /CLONE=IMAGE:3070639 /FEA=EST /CNT=70  
/TID=Hs.52620.3 /TIER=Stack /STK=24 /UG=Hs.52620 /LL=3696 /UG\_GENE=ITGB8  
/UG\_TITLE=integrin, beta 8"0.329361311\*0.42903489\*"Homo sapiens, clone  
IMAGE:4794726, mRNA"\*Hs.367688\*  
221805\_at\*"gb:AL537457 /DB\_XREF=gi:12800950 /DB\_XREF=AL537457  
/CLONE=CS0DF025YH07 (3 prime) /FEA=FLmRNA /CNT=134 /TID=Hs.211584.0  
/TIER=Stack /STK=35 /UG=Hs.211584 /LL=4747 /UG\_GENE=NEFL  
/UG\_TITLE=neurofilament, light polypeptide (68kD)  
/FL=gb:NM\_006158.1"0.329140318\*0.250857103\*"neurofilament, light polypeptide  
68kDa"\*NEFL\*Hs.521461\*ENSG00000104725\*5882 // intermediate filament //  
inferred from electronic annotation /// 5883 // neurofilament // traceable  
author statement /// 30424 // axon // inferred from direct assay\*5198 //  
structural molecule activity // inferred from electronic annotation /// 5200  
// structural constituent of cytoskeleton // traceable author statement ///  
5515 // protein binding // inferred from physical interaction  
238009\_at\*"gb:AI446064 /DB\_XREF=gi:4292592 /DB\_XREF=tj33c10.x1  
/CLONE=IMAGE:2143314 /FEA=EST /CNT=20 /TID=Hs.28107.0 /TIER=ConsEnd /STK=5  
/UG=Hs.28107 /UG\_TITLE=ESTs\*0.328349811\*0.266495752\*SRY (sex determining  
region Y)-box 5\*SOX5\*Hs.505007\*ENSG00000134532\*"6350 // transcription //  
inferred from electronic annotation /// 6355 // regulation of transcription,  
DNA-dependent // inferred from electronic annotation /// 6366 //  
transcription from RNA polymerase II promoter // traceable author  
statement"5634 // nucleus // inferred from electronic annotation\*3700 //  
transcription factor activity // traceable author statement  
223279\_s\_at\*"gb:AF322916.1 /DB\_XREF=gi:12240160 /FEA=FLmRNA /CNT=78

/TID=Hs.49753.0 /TIER=FL+Stack /STK=8 /UG=Hs.49753 /LL=55075  
/UG\_GENE=FLJ10128 /DEF=Homo sapiens uveal autoantigen mRNA, complete cds.  
/PROD=uveal autoantigen /FL=gb:AF322916.1\*0.328077579\*0.456112333\*uveal  
autoantigen with coiled-coil domains and ankyrin  
repeats\*UACA\*Hs.108049\*ENSG00000137831\*16032 // viral life cycle // inferred  
from electronic annotation\*5576 // extracellular region // non-traceable  
author statement\*  
219221\_at\*gb:NM\_024724.1 /DB\_XREF=gi:13376033 /GEN=FLJ22332 /FEA=FLmRNA  
/CNT=45 /TID=Hs.111092.0 /TIER=FL+Stack /STK=18 /UG=Hs.111092 /LL=79779  
/DEF=Homo sapiens hypothetical protein FLJ22332 (FLJ22332), mRNA.  
/PROD=hypothetical protein FLJ22332  
/FL=gb:NM\_024724.1\*0.325495212\*0.475734725\*zinc finger and BTB domain  
containing 38\*ZBTB38\*Hs.518301\*\*\*5634 // nucleus // inferred from electronic  
annotation\*3676 // nucleic acid binding // inferred from electronic  
annotation /// 8270 // zinc ion binding // inferred from electronic  
annotation  
229839\_at\*gb:AI799784 /DB\_XREF=gi:5365256 /DB\_XREF=wc43b08.x1  
/CLONE=IMAGE:2321367 /FEA=EST /CNT=10 /TID=Hs.49696.0 /TIER=Stack /STK=9  
/UG=Hs.49696 /UG\_TITLE=ESTs\*0.325481945\*0.201093114\*Hypothetical protein  
MGC45780\*MGC45780\*Hs.146246\*ENSG00000168079\*6817 // phosphate transport //  
inferred from electronic annotation\*5737 // cytoplasm // inferred from  
electronic annotation /// 16020 // membrane // inferred from electronic  
annotation\*4872 // receptor activity // inferred from electronic annotation  
/// 5044 // scavenger receptor activity // inferred from electronic  
annotation  
213203\_at\*gb:AI633709 /DB\_XREF=gi:4685039 /DB\_XREF=th71f03.x1  
/CLONE=IMAGE:2124125 /FEA=mRNA /CNT=59 /TID=Hs.30174.0 /TIER=Stack /STK=35  
/UG=Hs.30174 /LL=10302 /UG\_GENE=SNAPC5 /UG\_TITLE=small nuclear RNA activating  
complex, polypeptide 5, 19kD\*0.322856093\*0.296966444\*"Small nuclear RNA  
activating complex, polypeptide 5,  
19kDa"\*SNAPC5\*Hs.30174\*ENSG00000174446\*6350 // transcription // inferred  
from electronic annotation /// 6355 // regulation of transcription,  
DNA-dependent // inferred from electronic annotation /// 6366 //  
transcription from RNA polymerase II promoter // traceable author statement  
/// 6384 // \*5634 // nucleus // traceable author statement\*3700 //  
transcription factor activity // traceable author statement  
201163\_s\_at\*gb:NM\_001553.1 /DB\_XREF=gi:4504618 /GEN=IGFBP7 /FEA=FLmRNA  
/CNT=409 /TID=Hs.119206.0 /TIER=FL+Stack /STK=157 /UG=Hs.119206 /LL=3490  
/DEF=Homo sapiens insulin-like growth factor binding protein 7 (IGFBP7),  
mRNA. /PROD=insulin-like growth factor binding  
pro\*0.322828653\*0.452974194\*insulin-like growth factor binding protein  
7\*IGFBP7\*Hs.479808\*ENSG00000163453\*1558 // regulation of cell growth //  
inferred from electronic annotation /// 8285 // negative regulation of cell  
proliferation // traceable author statement\*5576 // extracellular region //  
inferred from electronic annotation\*5520 // insulin-like growth factor  
binding // inferred from electronic annotation  
225876\_at\*gb:T84558 /DB\_XREF=gi:712910 /DB\_XREF=yd53d09.r1  
/CLONE=IMAGE:111953 /FEA=mRNA /CNT=68 /TID=Hs.13804.1 /TIER=Stack /STK=11  
/UG=Hs.13804 /LL=57185 /UG\_GENE=DJ462023.2 /UG\_TITLE=hypothetical protein  
dJ462023.2\*0.321922938\*0.327428899\*hypothetical protein  
dJ462023.2\*DJ462023.2\*Hs.523442\*ENSG00000001461\*\*\*  
221601\_s\_at\*gb:AI084226 /DB\_XREF=gi:3422649 /DB\_XREF=oy72g09.x1  
/CLONE=IMAGE:1671424 /FEA=FLmRNA /CNT=75 /TID=Hs.58831.0 /TIER=Stack /STK=27  
/UG=Hs.58831 /LL=9214 /UG\_GENE=TOSO /UG\_TITLE=regulator of Fas-induced  
apoptosis /FL=gb:NM\_005449.1 gb:AF057557.1\*0.321435111\*0.301615731\*Fas  
apoptotic inhibitory molecule /// Fas apoptotic inhibitory  
molecule\*FAIM3\*Hs.58831\*ENSG00000162894\*6916 // anti-apoptosis // traceable  
author statement /// 6968 // cellular defense response // traceable author  
statement\*\*  
235122\_at\*gb:AI800713 /DB\_XREF=gi:5366107 /DB\_XREF=tc13c06.x1  
/CLONE=IMAGE:2063722 /FEA=EST /CNT=30 /TID=Hs.16365.0 /TIER=ConsEnd /STK=3  
/UG=Hs.16365 /UG\_TITLE=ESTs\*0.321186607\*0.312179861\*CDNA clone  
IMAGE:6254031\*\*Hs.403972\*\*\*  
209287\_s\_at\*gb:AF104857.1 /DB\_XREF=gi:4324453 /FEA=FLmRNA /CNT=172  
/TID=Hs.260024.0 /TIER=FL /STK=0 /UG=Hs.260024 /LL=10602 /UG\_GENE=CEP3  
/DEF=Homo sapiens Cdc42 effector protein 3 mRNA, complete cds. /PROD=Cdc42  
effector protein 3 /FL=gb:AF164118.1 gb:NM\_006449.1  
gb\*0.320948255\*0.476620103\*CDC42 effector protein (Rho GTPase binding)  
3\*CDC42EP3\*Hs.369574\*ENSG00000163171\*7165 // signal transduction // traceable  
author statement\*\*5519 // cytoskeletal regulatory protein binding //  
traceable author statement  
224950\_at\*gb:BF476250 /DB\_XREF=gi:11547077 /DB\_XREF=naa19c02.x1  
/CLONE=IMAGE:3255170 /FEA=mRNA /CNT=164 /TID=Hs.300591.0 /TIER=Stack /STK=30  
/UG=Hs.300591 /LL=57174 /UG\_GENE=KIAA1436 /UG\_TITLE=KIAA1436  
protein\*0.320869397\*0.245895375\*prostaglandin F2 receptor negative  
regulator\*PTGFRN\*Hs.418093\*ENSG00000134247\*17148 // negative regulation of  
protein biosynthesis // inferred from sequence or structural similarity\*16021  
// integral to membrane // inferred from electronic annotation\*5515 //  
protein binding // inferred from sequence or structural similarity  
227193\_at\*gb:AI955713 /DB\_XREF=gi:5748023 /DB\_XREF=wt37f01.x1  
/CLONE=IMAGE:2509657 /FEA=EST /CNT=40 /TID=Hs.23023.0 /TIER=Stack /STK=15

/UG=Hs.23023 /UG\_TITLE=ESTs•0.320769132•0.442011579•"CDNA FLJ37631 fis, clone BRCOC2015944"••Hs.375762••••  
1553177\_at•"gb:BC022407.1 /DB\_XREF=gi:18490408 /TID=Hs2.350581.1 /CNT=11 /FEA=FLmRNA /TIER=FL /STK=1 /LL=117157 /UG\_GENE=EAT2 /UG=Hs.350581 /DEF=Homo sapiens, SH2 domain-containing molecule EAT2, clone MGC:24157 IMAGE:4717041, mRNA, complete cds. /PROD=SH2 domain-con"•0.319992164•0.140769287•SH2 domain-containing molecule EAT2•EAT2•Hs.350581•ENSG00000198574•7242 // intracellular signaling cascade // inferred from electronic annotation•• 214459\_x\_at•"gb:M12679.1 /DB\_XREF=gi:187911 /GEN=HLA-C /FEA=FLmRNA /CNT=13 /TID=Hs.274485.0 /TIER=FL /STK=1 /UG=Hs.274485 /LL=51353 /UG\_TITLE=Cw1 antigen /DEF=Human Cw1 antigen mRNA, complete cds. /FL=gb:M12679.1"•0.319863005•0.275255734•"major histocompatibility complex, class I, C"•HLA-C•Hs.534125•ENSG00000198479•"19882 // antigen presentation // inferred from electronic annotation /// 19883 // antigen presentation, endogenous antigen // inferred from electronic annotation /// 19885 // antigen processing, endogenous antigen via MHC class I // inferred from electron"•5887 // integral to plasma membrane // non-traceable author statement /// 16020 // membrane // non-traceable author statement /// 16021 // integral to membrane // inferred from electronic annotation /// 42612 // MHC class I protein complex // inferred fro•30106 // MHC class I receptor activity // inferred from electronic annotation /// 30106 // MHC class I receptor activity // non-traceable author statement /// 45012 // MHC class II receptor activity // non-traceable author statement 231944\_at•"gb:AL045717 /DB\_XREF=gi:5433833 /DB\_XREF=DKFZp434D186\_s1 /CLONE=DKFZp434D186 /FEA=mRNA /CNT=18 /TID=Hs.188228.0 /TIER=ConsEnd /STK=2 /UG=Hs.188228 /UG\_TITLE=Homo sapiens cDNA FLJ11003 fis, clone PLACE1002851"•0.318758994•0.09761486•ERO1-like beta (S. cerevisiae)•ERO1LB•Hs.424926•ENSG00000086619•6118 // electron transport // inferred from electronic annotation /// 6457 // protein folding // traceable author statement /// 6810 // transport // inferred from electronic annotation•5783 // endoplasmic reticulum // traceable author statement /// 16020 // membrane // inferred from electronic annotation•16491 // oxidoreductase activity // non-traceable author statement /// 51082 // unfolded protein binding // non-traceable author statement 224458\_at•"gb:BC006115.1 /DB\_XREF=gi:13543948 /FEA=FLmRNA /CNT=1 /TID=HsAffx.900859.640 /TIER=FL /STK=0 /DEF=Homo sapiens, Similar to RIKEN cDNA 2810432L12 gene, clone MGC:12992, mRNA, complete cds. /PROD=Similar to RIKEN cDNA 2810432L12 gene /FL=gb:BC006115.1"•0.318357825•0.332268609•chromosome 9 open reading frame 125 // chromosome 9 open reading frame 125•C9orf125•Hs.254609•ENSG00000165152••• 230831\_at•gb:AW294986 /DB\_XREF=gi:6701622 /DB\_XREF=UI-H-BI2-ahs-c-05-0-UI.s1 /CLONE=IMAGE:2727920 /FEA=EST /CNT=10 /TID=Hs.21439.0 /TIER=Stack /STK=10 /UG=Hs.21439 /UG\_TITLE=ESTs•0.318320445•0.234532512•Hypothetical protein MGC14161•MGC14161•Hs.368399•ENSG00000171877••5737 // cytoplasm // inferred from electronic annotation /// 5856 // cytoskeleton // inferred from electronic annotation /// 16020 // membrane // inferred from electronic annotation•5488 // binding // inferred from electronic annotation /// 8092 // cytoskeletal protein binding // inferred from electronic annotation 216526\_x\_at•"gb:AK024836.1 /DB\_XREF=gi:10437242 /FEA=mRNA /CNT=1 /TID=Hs.277477.2 /TIER=ConsEnd /STK=0 /UG=Hs.277477 /LL=3107 /UG\_GENE=HLA-C /UG\_TITLE=major histocompatibility complex, class I, C /DEF=Homo sapiens cDNA: FLJ21183 fis, clone CAS11634, highly similar to "•0.317720115•0.327962158•"major histocompatibility complex, class I, C"•HLA-C•Hs.534125•ENSG00000198479•"19882 // antigen presentation // inferred from electronic annotation /// 19883 // antigen presentation, endogenous antigen // inferred from electronic annotation /// 19885 // antigen processing, endogenous antigen via MHC class I // inferred from electron"•5887 // integral to plasma membrane // non-traceable author statement /// 16020 // membrane // non-traceable author statement /// 16021 // integral to membrane // inferred from electronic annotation /// 42612 // MHC class I protein complex // inferred fro•30106 // MHC class I receptor activity // inferred from electronic annotation /// 30106 // MHC class I receptor activity // non-traceable author statement /// 45012 // MHC class II receptor activity // non-traceable author statement 204780\_s\_at•"gb:AA164751 /DB\_XREF=gi:1740929 /DB\_XREF=zo93g12.s1 /CLONE=IMAGE:594502 /FEA=FLmRNA /CNT=60 /TID=Hs.82359.0 /TIER=Stack /STK=13 /UG=Hs.82359 /LL=355 /UG\_GENE=TNFRSF6 /UG\_TITLE=tumor necrosis factor receptor superfamily, member 6 /FL=gb:NM\_000043.1 gb:M674"•0.317225659•0.300139465•"Fas (TNF receptor superfamily, member 6)"•FAS•Hs.244139•ENSG00000026103•6461 // protein complex assembly // traceable author statement /// 6915 // apoptosis // inferred from electronic annotation /// 6916 // anti-apoptosis // traceable author statement /// 6917 // induction of apoptosis // traceable author statement /// 6955 •5625 // soluble fraction // traceable author statement /// 5829 // cytosol // non-traceable author statement /// 16020 // membrane // inferred from electronic annotation /// 16021 // integral to membrane // inferred from electronic annotation•4888 // transmembrane receptor activity // inferred from electronic annotation /// 5515 // protein binding // inferred from electronic annotation 1555471\_a\_at•"gb:BC014364.1 /DB\_XREF=gi:15680077 /TID=Hs2.24889.2 /CNT=1

/FEA=FLmRNA /TIER=FL /STK=1 /LL=56776 /UG\_GENE=FMN2 /UG=Hs.24889 /DEF=Homo sapiens, clone MGC:24252 IMAGE:3932604, mRNA, complete cds. /PROD=Unknown (protein for MGC:24252) /FL=gb:BC014364.1"0.31518639\*0.178515726\*formin 2\*FMN2\*Hs.24889\*\*7242 // intracellular signaling cascade // inferred from electronic annotation /// 7275 // development // inferred from electronic annotation /// 7275 // development // non-traceable author statement /// 16043 // cell organization and biogenesis // inferred\*5634 // nucleus // inferred from electronic annotation\*3779 // actin binding // inferred from electronic annotation

202481\_at\*"gb:NM\_004753.1 /DB\_XREF=gi:4759083 /GEN=SDR1 /FEA=FLmRNA /CNT=134 /TID=Hs.17144.0 /TIER=FL+Stack /STK=62 /UG=Hs.17144 /LL=9249 /DEF=Homo sapiens short-chain dehydrogenasereductase 1 (SDR1), mRNA. /PROD=short-chain dehydrogenasereductase 1

/FL=gb:BC002730."0.314932119\*0.241452785\*dehydrogenase/reductase (SDR family) member 3\*DHR3\*Hs.289347\*ENSG00000162496\*6631 // fatty acid metabolism // traceable author statement /// 7601 // visual perception // traceable author statement /// 8152 // metabolism // inferred from electronic annotation\*16021 // integral to membrane // inferred from electronic annotation\*166 // nucleotide binding // traceable author statement /// 4022 // alcohol dehydrogenase activity // inferred from electronic annotation /// 5489 // electron transporter activity // traceable author statement /// 16491 // oxidoreductase activity // infer

238513\_at\*gb:BF905445 /DB\_XREF=gi:12296904 /DB\_XREF=MR3-MT0329-261200-002-a08 /FEA=EST /CNT=13 /TID=Hs.25978.0 /TIER=ConsEnd /STK=0 /UG=Hs.25978 /UG\_TITLE=ESTs\*0.313951821\*0.441616491\*Proline rich Gla (G-carboxyglutamic acid) 4 (transmembrane)\*PRRG4\*Hs.471695\*ENSG00000135378\*\*5576 // extracellular region // inferred from electronic annotation /// 16021 // integral to membrane // non-traceable author statement\*5509 // calcium ion binding // inferred from electronic annotation

226051\_at\*gb:BF973568 /DB\_XREF=gi:12340783 /DB\_XREF=602242731F1 /CLONE=IMAGE:4331335 /FEA=EST /CNT=65 /TID=Hs.55940.0 /TIER=Stack /STK=31 /UG=Hs.55940 /UG\_TITLE=ESTs\*0.313462008\*0.473771578\*selenoprotein M\*SELM\*Hs.55940\*\*\*\*

209286\_at\*gb:AI754416 /DB\_XREF=gi:5132680 /DB\_XREF=cr25a08.xl /CLONE=HBMSC\_cr25a08 /FEA=FLmRNA /CNT=172 /TID=Hs.260024.0 /TIER=Stack /STK=26 /UG=Hs.260024 /LL=10602 /UG\_GENE=CEP3 /UG\_TITLE=Cdc42 effector protein 3 /FL=gb:AF164118.1 gb:NM\_006449.1 gb:AF094521.1 gb:A\*0.313215413\*0.364798852\*CDC42 effector protein (Rho GTPase binding) 3\*CDC42EP3\*Hs.369574\*ENSG00000163171\*7165 // signal transduction // traceable author statement\*\*5519 // cytoskeletal regulatory protein binding // traceable author statement

242997\_at\*gb:AW664311 /DB\_XREF=gi:7456852 /DB\_XREF=hi09f06.xl /CLONE=IMAGE:2971811 /FEA=EST /CNT=5 /TID=Hs.259498.0 /TIER=ConsEnd /STK=3 /UG=Hs.259498 /UG\_TITLE=ESTs\*0.313035013\*0.280343179\*"CDNA clone IMAGE:3878708, partial cds"\*Hs.259498\*\*\*\*

204627\_s\_at\*"gb:M35999.1 /DB\_XREF=gi:183532 /FEA=FLmRNA /CNT=66 /TID=Hs.87149.0 /TIER=FL /STK=0 /UG=Hs.87149 /LL=3690 /UG\_GENE=ITGB3 /UG\_TITLE=integrin, beta 3 (platelet glycoprotein IIIa, antigen CD61) /DEF=Human platelet glycoprotein IIIa (GPIIIa) mRNA, complete cds\*0.311760513\*0.308651659\*"integrin, beta 3 (platelet glycoprotein IIIa, antigen CD61)"\*ITGB3\*Hs.218040\*ENSG00000056345\*7160 // cell-matrix adhesion // inferred from electronic annotation /// 7229 // integrin-mediated signaling pathway // inferred from electronic annotation /// 7596 // blood coagulation // traceable author statement\*8305 // integrin complex // traceable author statement\*4872 // receptor activity // inferred from electronic annotation /// 5515 // protein binding // inferred from electronic annotation

221215\_s\_at\*"gb:NM\_020639.1 /DB\_XREF=gi:10190675 /GEN=ANKRD3 /FEA=FLmRNA /CNT=2 /TID=Hs.55565.0 /TIER=FL /STK=1 /UG=Hs.55565 /LL=54101 /DEF=Homo sapiens ankyrin repeat domain 3 (ANKRD3), mRNA. /PROD=ankyrin repeat domain 3 /FL=gb:NM\_020639.1"0.31105269\*0.327297024\*receptor-interacting serine-threonine kinase 4\*RIPK4\*Hs.517310\*ENSG00000183421\*6468 // protein amino acid phosphorylation // inferred from direct assay /// 6468 // protein amino acid phosphorylation // inferred from electronic annotation\*\*4674 // protein serine/threonine kinase activity // inferred from direct assay /// 4674 // protein serine/threonine kinase activity // inferred from electronic annotation /// 5515 // protein binding // inferred from physical interaction /// 5524 // ATP bi

218035\_s\_at\*"gb:NM\_019027.1 /DB\_XREF=gi:9506670 /GEN=FLJ20273 /FEA=FLmRNA /CNT=177 /TID=Hs.95549.0 /TIER=FL+Stack /STK=22 /UG=Hs.95549 /LL=54502 /DEF=Homo sapiens hypothetical protein (FLJ20273), mRNA. /PROD=hypothetical protein /FL=gb:NM\_019027.1"0.310521165\*0.283122316\*RNA-binding protein\*FLJ20273\*Hs.518727\*ENSG00000163694\*\*166 // nucleotide binding // inferred from electronic annotation /// 3676 // nucleic acid binding // inferred from electronic annotation

217362\_x\_at\*"gb:AF005487.1 /DB\_XREF=gi:5915893 /FEA=mRNA /CNT=2 /TID=Hs.167385.0 /TIER=ConsEnd /STK=0 /UG=Hs.167385 /UG\_TITLE=Homo sapiens MHC class II antigen HLA-DRB6 mRNA, partial cds /DEF=Homo sapiens MHC class II antigen (DRB6) mRNA, HLA-DRB6\*0201 allele, sequenc\*0.310278639\*0.248200861\*"major histocompatibility complex, class II, DR beta 6 (pseudogene)"\*HLA-DRB6\*Hs.545653\*\*\*\*

1554093\_a\_at\*"gb:BC014315.1 /DB\_XREF=gi:15680008 /TID=Hs2.30174.2 /CNT=12 /FEA=FLmRNA /TIER=FL /STK=4 /LL=10302 /UG\_GENE=SNAPC5 /UG=Hs.30174 /DEF=Homo sapiens, Similar to small nuclear RNA activating complex, polypeptide 5, 19kD, clone MGC:22700 IMAGE:3997264, mRNA, co"\*0.309358042\*0.371366591\*"small nuclear RNA activating complex, polypeptide 5, 19kDa"\*SNAPC5\*Hs.30174\*ENSG00000174446\*"6350 // transcription // inferred from electronic annotation /// 6355 // regulation of transcription, DNA-dependent // inferred from electronic annotation /// 6366 // transcription from RNA polymerase II promoter // traceable author statement /// 6384 // "\*5634 // nucleus // traceable author statement\*3700 // transcription factor activity // traceable author statement

214838\_at\*gb:AL035297.1 /DB\_XREF=gi:4200248 /FEA=mRNA /CNT=12 /TID=Hs.119254.0 /TIER=ConsEnd /STK=0 /UG=Hs.119254 /DEF=H.sapiens gene from PAC 747L4. /PROD=hypothetical protein\*0.308202256\*0.303020022\*hypothetical protein LOC375035\*LOC375035\*Hs.546557\*ENSG00000184197\*\*\*

209514\_s\_at\*"gb:BE502030 /DB\_XREF=gi:9704438 /DB\_XREF=hy11d05.x1 /CLONE=IMAGE:3197001 /FEA=FLmRNA /CNT=83 /TID=Hs.50477.1 /TIER=Stack /STK=12 /UG=Hs.50477 /LL=5873 /UG\_GENE=RAB27A /UG\_TITLE=RAB27A, member RAS oncogene family /FL=gb:U38654.3"\*0.308099948\*0.223938749\*"RAB27A, member RAS oncogene family"\*RAB27A\*Hs.298651\*ENSG00000069974\*7264 // small GTPase mediated signal transduction // inferred from electronic annotation\*\*3924 // GTPase activity // traceable author statement /// 5525 // GTP binding // inferred from electronic annotation

1554049\_s\_at\*"gb:BC013107.1 /DB\_XREF=gi:15341858 /TID=Hs2.110707.2 /CNT=29 /FEA=FLmRNA /TIER=FL /STK=5 /LL=50717 /UG\_GENE=H326 /UG=Hs.110707 /DEF=Homo sapiens, clone MGC:9478 IMAGE:3918647, mRNA, complete cds. /PROD=Unknown (protein for MGC:9478) /FL=gb:BC013107.1"\*0.306339094\*0.333325774\*WD repeat domain 42A\*WDR42A\*Hs.492236\*ENSG00000132716\*\*\*

213599\_at\*gb:BE045993 /DB\_XREF=gi:8363046 /DB\_XREF=hd91c08.x4 /CLONE=IMAGE:2916878 /FEA=mRNA /CNT=31 /TID=Hs.116206.0 /TIER=Stack /STK=12 /UG=Hs.116206 /LL=11339 /UG\_GENE=OIP5 /UG\_TITLE=Opa-interacting protein 5\*0.304903478\*0.266589565\*Opa interacting protein 5\*OIP5\*Hs.511092\*ENSG00000104147\*7154 // cell communication // non-traceable author statement\*\*5515 // protein binding // traceable author statement

201825\_s\_at\*gb:AL572542 /DB\_XREF=gi:12930912 /DB\_XREF=AL572542 /CLONE=CS0DI008YC09 (3 prime) /FEA=FLmRNA /CNT=244 /TID=Hs.238126.0 /TIER=Stack /STK=69 /UG=Hs.238126 /LL=51097 /UG\_GENE=LOC51097 /UG\_TITLE=CGI-49 protein /FL=gb:NM\_016002.1 gb:AF151807.1\*0.304714068\*0.322588409\*CGI-49 protein\*CGI-49\*Hs.498397\*ENSG00000143653\*\*\*

201925\_s\_at\*"gb:NM\_000574.1 /DB\_XREF=gi:10835142 /GEN=DAF /FEA=FLmRNA /CNT=314 /TID=Hs.1369.0 /TIER=FL+Stack /STK=84 /UG=Hs.1369 /LL=1604 /DEF=Homo sapiens decay accelerating factor for complement (CD55, Cromer blood group system) (DAF), mRNA. /PROD=decay accelerating"\*0.303353317\*0.210470539\*"decay accelerating factor for complement (CD55, Cromer blood group system)"\*DAF\*Hs.527653\*ENSG00000196352\*"6955 // immune response // inferred from electronic annotation /// 6958 // complement activation, classical pathway // inferred from electronic annotation\*\*5625 // soluble fraction // traceable author statement /// 5887 // integral to plasma membrane // traceable author statement /// 16020 // membrane // inferred from electronic annotation\*

204268\_at\*"gb:NM\_005978.2 /DB\_XREF=gi:9845513 /GEN=S100A2 /FEA=FLmRNA /CNT=73 /TID=Hs.38991.0 /TIER=FL+Stack /STK=32 /UG=Hs.38991 /LL=6273 /DEF=Homo sapiens S100 calcium-binding protein A2 (S100A2), mRNA. /PROD=S100 calcium-binding protein A2 /FL=gb:NM\_005978.2 gb:B"\*0.302570694\*0.273671908\*S100 calcium binding protein A2\*S100A2\*Hs.516484\*ENSG00000196754\*\*\*5509 // calcium ion binding // non-traceable author statement

203921\_at\*"gb:NM\_004267.1 /DB\_XREF=gi:4757983 /GEN=CHST2 /FEA=FLmRNA /CNT=82 /TID=Hs.8786.0 /TIER=FL+Stack /STK=43 /UG=Hs.8786 /LL=9435 /DEF=Homo sapiens carbohydrate (chondroitin 6keratan) sulfotransferase 2 (CHST2), mRNA. /PROD=carbohydrate (chondroitin 6keratan)s"\*0.300448341\*0.306711863\*carbohydrate (N-acetylglucosamine-6-O) sulfotransferase 2\*CHST2\*Hs.8786\*ENSG00000175040\*5975 // carbohydrate metabolism // inferred from electronic annotation /// 6044 // N-acetylglucosamine metabolism // inferred from direct assay /// 6790 // sulfur metabolism // inferred from direct assay /// 6954 // inflammatory response // inferred from \*5802 // Golgi trans face // inferred from direct assay /// 16021 // integral to membrane // inferred from electronic annotation /// 31228 // intrinsic to Golgi membrane // non-traceable author statement\*1517 // N-acetylglucosamine 6-O-sulfotransferase activity // inferred from direct assay /// 16740 // transferase activity // inferred from electronic annotation

226991\_at\*"gb:AA489681 /DB\_XREF=gi:2219283 /DB\_XREF=aa50c04.s1 /CLONE=IMAGE:824358 /FEA=mRNA /CNT=51 /TID=Hs.102248.0 /TIER=Stack /STK=30 /UG=Hs.102248 /UG\_TITLE=Homo sapiens cDNA: FLJ22105 fis, clone HEP17660"\*0.300143304\*0.180361942\*"Nuclear factor of activated T-cells, cytoplasmic, calcineurin-dependent 2"\*NFATC2\*Hs.356321\*ENSG00000101096\*"6355 // regulation of transcription, DNA-dependent // inferred from electronic annotation /// 6355 // regulation of transcription, DNA-dependent // traceable author statement"\*5634 // nucleus // inferred from electronic

annotation /// 5634 // nucleus // traceable author statement /// 5737 // cytoplasm // traceable author statement•3700 // transcription factor activity // inferred from electronic annotation /// 3700 // transcription factor activity // traceable author statement  
227827\_at•gb:AW138143 /DB\_XREF=gi:6142543 /DB\_XREF=UI-H-BI1-acy-b-09-0-UI.s1 /CLONE=IMAGE:2715976 /FEA=EST /CNT=32 /TID=Hs.71721.0 /TIER=Stack /STK=16 /UG=Hs.71721 /UG\_TITLE=ESTs•0.299211701•0.283903787•Arg/Abl-interacting protein ArgBP2•ARGBP2•Hs.481342•ENSG00000154556••5634 // nucleus // inferred from electronic annotation /// 5634 // nucleus // non-traceable author statement /// 5634 // nucleus // traceable author statement /// 5856 // cytoskeleton // inferred from electronic annotation /// 15629 // actin cytoskeleton •3676 // nucleic acid binding // inferred from electronic annotation /// 5200 // structural constituent of cytoskeleton // traceable author statement /// 5515 // protein binding // non-traceable author statement /// 8093 // cytoskeletal adaptor activity //  
202488\_s\_at•"gb:NM\_005971.2 /DB\_XREF=gi:11612675 /GEN=FXVD3 /FEA=FLmRNA /CNT=217 /TID=Hs.301350.0 /TIER=FL+Stack /STK=18 /UG=Hs.301350 /LL=5349 /DEF=Homo sapiens FXVD domain-containing ion transport regulator 3 (FXVD3), transcript variant 1, mRNA. /PROD=MAT-8 protein,"•0.298821164•0.078494809•FXVD domain containing ion transport regulator 3•FXVD3•Hs.301350•ENSG00000089356•6811 // ion transport // inferred from electronic annotation /// 6821 // chloride transport // traceable author statement•5887 // integral to plasma membrane // traceable author statement /// 16020 // membrane // inferred from electronic annotation•5216 // ion channel activity // inferred from electronic annotation /// 5254 // chloride channel activity // traceable author statement  
204628\_s\_at•"gb:NM\_000212.1 /DB\_XREF=gi:4557676 /GEN=ITGB3 /FEA=FLmRNA /CNT=66 /TID=Hs.87149.0 /TIER=FL /STK=0 /UG=Hs.87149 /LL=3690 /DEF=Homo sapiens integrin, beta 3 (platelet glycoprotein IIIa, antigen CD61) (ITGB3), mRNA. /PROD=integrin beta chain, beta 3 precursor"•0.298712975•0.260757517•"integrin, beta 3 (platelet glycoprotein IIIa, antigen CD61)"•ITGB3•Hs.218040•ENSG00000056345•7160 // cell-matrix adhesion // inferred from electronic annotation /// 7229 // integrin-mediated signaling pathway // inferred from electronic annotation /// 7596 // blood coagulation // traceable author statement•8305 // integrin complex // traceable author statement•4872 // receptor activity // inferred from electronic annotation /// 5515 // protein binding // inferred from electronic annotation  
205097\_at•"gb:AI025519 /DB\_XREF=gi:3241132 /DB\_XREF=ov75c04.x1 /CLONE=IMAGE:1643142 /FEA=FLmRNA /CNT=44 /TID=Hs.29981.0 /TIER=Stack /STK=19 /UG=Hs.29981 /LL=1836 /UG\_GENE=SLC26A2 /UG\_TITLE=solute carrier family 26 (sulfate transporter), member 2 /FL=gb:U14528.1 gb:N"•0.29748411•0.303042601•"solute carrier family 26 (sulfate transporter), member 2"•SLC26A2•Hs.302738•ENSG00000155850•6810 // transport // inferred from electronic annotation /// 8272 // sulfate transport // traceable author statement•5624 // membrane fraction // traceable author statement /// 5887 // integral to plasma membrane // traceable author statement /// 16020 // membrane // inferred from electronic annotation•8271 // sulfate porter activity // inferred from electronic annotation  
205101\_at•"gb:NM\_000246.1 /DB\_XREF=gi:4557748 /GEN=MHC2TA /FEA=FLmRNA /CNT=54 /TID=Hs.3076.0 /TIER=FL /STK=0 /UG=Hs.3076 /LL=4261 /DEF=Homo sapiens MHC class II transactivator (MHC2TA), mRNA. /PROD=MHC class II transactivator /FL=gb:U18259.1 gb:NM\_000246.1"•0.295373757•0.428976164•MHC class II transactivator•MHC2TA•Hs.126714•ENSG00000179583•"6355 // regulation of transcription, DNA-dependent // inferred from electronic annotation /// 6955 // immune response // traceable author statement /// 9596 // detection of pest, pathogen or parasite // traceable author statement /// 42829 // defense resp"•5634 // nucleus // inferred from electronic annotation•3677 // DNA binding // traceable author statement /// 3702 // RNA polymerase II transcription factor activity // traceable author statement /// 3713 // transcription coactivator activity // traceable author statement /// 5524 // ATP binding // inferred fr  
203973\_s\_at•"gb:NM\_005195.1 /DB\_XREF=gi:4885130 /GEN=CEBPD /FEA=FLmRNA /CNT=116 /TID=Hs.76722.0 /TIER=FL+Stack /STK=69 /UG=Hs.76722 /LL=1052 /DEF=Homo sapiens CCAATenhancer binding protein (CEBP), delta (CEBPD), mRNA. /PROD=CCAATenhancer binding protein (CEBP), delta "•0.294973117•0.255817514•"CCAAT/enhancer binding protein (C/EBP), delta"•CEBPD•Hs.440829•ENSG00000180733•"6350 // transcription // inferred from electronic annotation /// 6355 // regulation of transcription, DNA-dependent // inferred from electronic annotation /// 6366 // transcription from RNA polymerase II promoter // traceable author statement"•5634 // nucleus // inferred from electronic annotation•3677 // DNA binding // inferred from electronic annotation  
218404\_at•"gb:NM\_013322.1 /DB\_XREF=gi:7019536 /GEN=SNX10 /FEA=FLmRNA /CNT=110 /TID=Hs.106260.0 /TIER=FL+Stack /STK=23 /UG=Hs.106260 /LL=29887 /DEF=Homo sapiens sorting nexin 10 (SNX10), mRNA. /PROD=sorting nexin 10 /FL=gb:AF121860.1 gb:NM\_013322.1"•0.294837401•0.282136589•sorting nexin 10•SNX10•Hs.520714•ENSG00000086300•7242 // intracellular signaling cascade // inferred from electronic annotation /// 15031 // protein transport // inferred from electronic annotation••  
230645\_at•"gb:BF110588 /DB\_XREF=gi:10940278 /DB\_XREF=7n39e12.x1

/CLONE=IMAGE:3567071 /FEA=EST /CNT=10 /TID=Hs.150478.0 /TIER=Stack /STK=9  
/UG=Hs.150478 /UG\_TITLE=ESTs, Weakly similar to KIAA0987 protein  
(H.sapiens)"\*0.294088466\*0.227629134\*FERM domain containing  
3\*FRMD3\*Hs.127535\*ENSG00000172159\*8152 // metabolism // inferred from  
electronic annotation\*5737 // cytoplasm // inferred from electronic  
annotation /// 5856 // cytoskeleton // inferred from electronic annotation  
/// 16020 // membrane // inferred from electronic annotation\*287 // magnesium  
ion binding // inferred from electronic annotation /// 5488 // binding //  
inferred from electronic annotation /// 8092 // cytoskeletal protein binding  
// inferred from electronic annotation /// 16462 // pyrophosphatase activity  
// inferre  
219377\_at\*"gb:NM\_022751.1 /DB\_XREF=gi:12232414 /GEN=FLJ21610 /FEA=FLmRNA  
/CNT=44 /TID=Hs.12727.0 /TIER=FL /STK=2 /UG=Hs.12727 /LL=64762 /DEF=Homo  
sapiens hypothetical protein FLJ21610 (FLJ21610), mRNA. /PROD=hypothetical  
protein FLJ21610 /FL=gb:NM\_022751.1"\*0.294063071\*0.465847214\*"family with  
sequence similarity 59, member A"\*FAM59A\*Hs.444314\*ENSG00000141441\*5529 //  
sugar binding // inferred from electronic annotation  
235944\_at\*"gb:BF446673 /DB\_XREF=gi:11511811 /DB\_XREF=7q90e09.x1  
/CLONE=IMAGE:3705689 /FEA=EST /CNT=10 /TID=Hs.150042.0 /TIER=ConsEnd /STK=1  
/UG=Hs.150042  
/UG\_TITLE=ESTs\*0.293530078\*0.34247325\*hemicentin\*FIBL-6\*Hs.58877\*ENSG000001433  
41\*6468 // protein amino acid phosphorylation // inferred from electronic  
annotation /// 7155 // cell adhesion // inferred from electronic annotation  
/// 7156 // homophilic cell adhesion // inferred from electronic annotation  
/// 7596 // blood coagulation // \*16020 // membrane // inferred from  
electronic annotation\*4888 // transmembrane receptor activity // inferred  
from electronic annotation /// 5021 // vascular endothelial growth factor  
receptor activity // inferred from electronic annotation /// 5509 // calcium  
ion binding // inferred from electronic annotation /  
209728\_at\*"gb:BC005312.1 /DB\_XREF=gi:13529055 /FEA=FLmRNA /CNT=84  
/TID=Hs.318720.0 /TIER=FL+Stack /STK=31 /UG=Hs.318720 /DEF=Homo sapiens,  
clone MGC:12387, mRNA, complete cds. /PROD=Unknown (protein for MGC:12387)  
/FL=gb:M16942.1 gb:BC005312.1"\*0.293224614\*0.180698512\*"major  
histocompatibility complex, class II, DR beta 4 /// major histocompatibility  
complex, class II, DR beta 4"\*HLA-DRB4\*Hs.534321\*ENSG00000196915\*"6955 //  
immune response // inferred from electronic annotation /// 7165 // signal  
transduction // non-traceable author statement /// 9405 // pathogenesis //  
traceable author statement /// 19884 // antigen presentation, exogenous  
antigen // inferred from e"\*5887 // integral to plasma membrane // not  
recorded /// 16020 // membrane // inferred from electronic annotation ///  
16021 // integral to membrane // inferred from electronic annotation\*45012 //  
MHC class II receptor activity // inferred from electronic annotation ///  
45012 // MHC class II receptor activity // traceable author statement  
203561\_at\*"gb:NM\_021642.1 /DB\_XREF=gi:11056051 /GEN=FCGR2A /FEA=FLmRNA  
/CNT=142 /TID=Hs.78864.0 /TIER=FL+Stack /STK=8 /UG=Hs.78864 /LL=2212  
/DEF=Homo sapiens Fc fragment of IgG, low affinity IIa, receptor for (CD32)  
(FCGR2A), mRNA. /PROD=Fc fragment of IgG, low  
affi"\*0.291275903\*0.243931508\*"Fc fragment of IgG, low affinity IIa, receptor  
(CD32)"\*FCGR2A\*Hs.352642\*ENSG00000143226\*6955 // immune response // not  
recorded\*5886 // plasma membrane // non-traceable author statement /// 16021  
// integral to membrane // inferred from electronic annotation\*4872 //  
receptor activity // inferred from electronic annotation /// 5057 // receptor  
signaling protein activity // not recorded /// 19864 // IgG binding //  
inferred from electronic annotation  
223991\_s\_at\*"gb:AF130059.1 /DB\_XREF=gi:11493424 /FEA=FLmRNA /CNT=3  
/TID=Hs.99858.1 /TIER=FL /STK=0 /UG=Hs.99858 /LL=6130 /UG\_GENE=RPL7A  
/DEF=Homo sapiens clone FLB5634 PRO1477 mRNA, complete cds. /PROD=PRO1477  
/FL=gb:AF130059.1"\*0.291120475\*0.219294329\*UDP-N-acetyl-alpha-D-galactosamine:  
polypeptide N-acetylgalactosaminyltransferase 2  
(GalNAc-T2)\*GALNT2\*Hs.300834\*ENSG00000143641\*6493 // O-linked glycosylation  
// traceable author statement\*5794 // Golgi apparatus // inferred from  
electronic annotation /// 16021 // integral to membrane // inferred from  
electronic annotation\*"4653 // polypeptide N-acetylgalactosaminyltransferase  
activity // traceable author statement /// 5529 // sugar binding // inferred  
from electronic annotation /// 16757 // transferase activity, transferring  
glycosyl groups // inferred from electronic annot"  
227998\_at\*"gb:AA045184 /DB\_XREF=gi:1523386 /DB\_XREF=zk66c01.s1  
/CLONE=IMAGE:487776 /FEA=EST /CNT=23 /TID=Hs.738.3 /TIER=Stack /STK=16  
/UG=Hs.738 /LL=9045 /UG\_GENE=RPL14 /UG\_TITLE=ribosomal protein  
L14\*0.290239401\*0.355984084\*S100 calcium binding protein  
A16\*S100A16\*Hs.515714\*ENSG00000188643\*5509 // calcium ion binding //  
inferred from electronic annotation  
225681\_at\*"gb:AA584310 /DB\_XREF=gi:2368919 /DB\_XREF=nn79g01.s1  
/CLONE=IMAGE:1090128 /FEA=EST /CNT=87 /TID=Hs.283713.0 /TIER=Stack /STK=54  
/UG=Hs.283713 /UG\_TITLE=ESTs, Weakly similar to ORF YGL050w  
(S.cerevisiae)"\*0.288349646\*0.23214703\*collagen triple helix repeat  
containing 1\*CTHRC1\*Hs.405614\*ENSG00000164932\*6817 // phosphate transport //  
inferred from electronic annotation /// 7155 // cell adhesion // inferred  
from electronic annotation\*5737 // cytoplasm // inferred from electronic  
annotation\*5198 // structural molecule activity // inferred from electronic  
annotation /// 5515 // protein binding // inferred from electronic



annotation

204527\_at•"gb:NM\_000259.1 /DB\_XREF=gi:10835118 /GEN=MYO5A /FEA=FLmRNA /CNT=65 /TID=Hs.170157.0 /TIER=FL /STK=7 /UG=Hs.170157 /LL=4644 /DEF=Homo sapiens myosin VA (heavy polypeptide 12, myoxin) (MYO5A), mRNA. /PROD=myosin VA (heavy polypeptide 12, myoxin) /FL=gb:U909"•0.288078303•0.357998865•"myosin VA (heavy polypeptide 12, myoxin)"•MYO5A•Hs.21213•ENSG00000197535•6810 // transport // non-traceable author statement /// 30048 // actin filament-based movement // non-traceable author statement•16459 // myosin // inferred from electronic annotation /// 30426 // growth cone // non-traceable author statement /// 43005 // neuronal cell projection // non-traceable author statement•146 // microfilament motor activity // non-traceable author statement /// 3779 // actin binding // inferred from electronic annotation /// 5516 // calmodulin binding // inferred from electronic annotation /// 5524 // ATP binding // inferred from electronic annotation

203263\_s\_at•gb:AI625739 /DB\_XREF=gi:4650670 /DB\_XREF=ty65g05.x1 /CLONE=IMAGE:2283992 /FEA=FLmRNA /CNT=119 /TID=Hs.54697.0 /TIER=Stack /STK=12 /UG=Hs.54697 /LL=23229 /UG\_GENE=ARHGEF9 /UG\_TITLE=Cdc42 guanine exchange factor (GEF) 9 /FL=gb:NM\_015185.1•0.287807239•0.222283704•Cdc42 guanine nucleotide exchange factor (GEF) 9•ARHGEF9•Hs.54697•ENSG00000131089••• 229285\_at•gb:AI669749 /DB\_XREF=gi:4834523 /DB\_XREF=tul2f11.x1 /CLONE=IMAGE:2250861 /FEA=EST /CNT=12 /TID=Hs.56156.0 /TIER=Stack /STK=11 /UG=Hs.56156 /UG\_TITLE=ESTs•0.287376276•0.254177171•"ribonuclease L (2',5'-oligoadenylate synthetase-dependent)"•RNASEL•Hs.518545•ENSG00000135828•6397 // mRNA processing // inferred from electronic annotation /// 6468 // protein amino acid phosphorylation // non-traceable author statement••3723 // RNA binding // inferred from direct assay /// 4672 // protein kinase activity // inferred from electronic annotation /// 5524 // ATP binding // inferred from electronic annotation /// 16787 // hydrolase activity // inferred from electronic annotation

227067\_x\_at•gb:AW024960 /DB\_XREF=gi:5878490 /DB\_XREF=wu70c08.x1 /CLONE=IMAGE:2525390 /FEA=EST /CNT=32 /TID=Hs.8121.2 /TIER=Stack /STK=26 /UG=Hs.8121 /LL=4853 /UG\_GENE=NOTCH2 /UG\_TITLE=Notch (Drosophila) homolog 2•0.287266534•0.259946741•Notch homolog 2 (Drosophila) N-terminal like•NOTCH2NL•Hs.502564•ENSG00000163386•••5509 // calcium ion binding // inferred from electronic annotation

228442\_at•gb:AI770171 /DB\_XREF=gi:5236626 /DB\_XREF=wi79b10.x1 /CLONE=IMAGE:2399515 /FEA=EST /CNT=23 /TID=Hs.112157.0 /TIER=Stack /STK=23 /UG=Hs.112157 /UG\_TITLE=ESTs•0.286310597•0.224929837•"Nuclear factor of activated T-cells, cytoplasmic, calcineurin-dependent 2"•NFATC2•Hs.356321•ENSG00000101096•"6355 // regulation of transcription, DNA-dependent // inferred from electronic annotation /// 6355 // regulation of transcription, DNA-dependent // traceable author statement"•5634 // nucleus // inferred from electronic annotation /// 5634 // nucleus // traceable author statement /// 5737 // cytoplasm // traceable author statement•3700 // transcription factor activity // inferred from electronic annotation /// 3700 // transcription factor activity // traceable author statement

1561691\_at•"gb:BC039371.1 /DB\_XREF=gi:24659793 /TID=Hs2.407549.1 /CNT=1 /FEA=mRNA /TIER=ConsEnd /STK=1 /LL=285735 /UG\_GENE=LOC285735 /UG=Hs.407549 /UG\_TITLE=hypothetical protein LOC285735 /DEF=Homo sapiens, clone IMAGE:5271214, mRNA."•0.285653768•0.206420453•hypothetical protein LOC285735•LOC285735•Hs.407549••••

203455\_s\_at•"gb:NM\_002970.1 /DB\_XREF=gi:4506788 /GEN=SAT /FEA=FLmRNA /CNT=192 /TID=Hs.28491.0 /TIER=FL+Stack /STK=183 /UG=Hs.28491 /LL=6303 /DEF=Homo sapiens spermidinespermine N1-acetyltransferase (SAT), mRNA. /PROD=spermidinespermine N1-acetyltransferase /FL=gb:M776"•0.285561654•0.275182508•spermidine/spermine N1-acetyltransferase•SAT•Hs.28491•ENSG00000130066•••4145 // diamine N-acetyltransferase activity // traceable author statement /// 8415 // acyltransferase activity // inferred from electronic annotation /// 16740 // transferase activity // inferred from electronic annotation

228247\_at•"gb:H43637 /DB\_XREF=gi:919689 /DB\_XREF=yp24b06.s1 /CLONE=IMAGE:188339 /FEA=EST /CNT=28 /TID=Hs.10726.0 /TIER=Stack /STK=11 /UG=Hs.10726 /UG\_TITLE=ESTs, Weakly similar to ALU1\_HUMAN ALU SUBFAMILY J SEQUENCE CONTAMINATION WARNING ENTRY (H.sapiens)"•0.285303228•0.254259418•Similar to FRG1 protein (FSHD region gene 1 protein)•MGC72104•Hs.529357•ENSG00000149531•••

229327\_s\_at•gb:BE674528 /DB\_XREF=gi:10035069 /DB\_XREF=7e02b02.x1 /CLONE=IMAGE:3281259 /FEA=EST /CNT=33 /TID=Hs.30250.2 /TIER=Stack /STK=13 /UG=Hs.30250 /LL=4094 /UG\_GENE=MAF /UG\_TITLE=v-maf musculoaponeurotic fibrosarcoma (avian) oncogene homolog•0.284643464•0.16928561•V-maf musculoaponeurotic fibrosarcoma oncogene homolog (avian)•MAF•Hs.134859•ENSG00000178573•"6350 // transcription // inferred from electronic annotation /// 6355 // regulation of transcription, DNA-dependent // inferred from electronic annotation /// 6366 // transcription from RNA polymerase II promoter // traceable author statement"•785 // chromatin // traceable author statement /// 5634 // nucleus // inferred from electronic annotation•3677 // DNA binding // inferred from electronic annotation /// 3702 // RNA polymerase II transcription factor activity // traceable author statement

219049\_at\*gb:NM\_018371.1 /DB\_XREF=gi:8922959 /GEN=FLJ11264 /FEA=FLmRNA /CNT=52 /TID=Hs.11260.0 /TIER=FL /STK=1 /UG=Hs.11260 /LL=55790 /DEF=Homo sapiens hypothetical protein FLJ11264 (FLJ11264), mRNA. /PROD=hypothetical protein FLJ11264 /FL=gb:NM\_018371.1"0.284049643\*0.175014499\*"chondroitin beta1,4 N-acetylgalactosaminyltransferase"\*ChGn\*Hs.387794\*ENSG00000147408\*7399 // neurogenesis // non-traceable author statement /// 8037 // cell recognition // non-traceable author statement /// 8283 // cell proliferation // non-traceable author statement /// 9653 // morphogenesis // non-traceable author statement /// 15014 // \*5622 // intracellular // inferred from sequence or structural similarity /// 5625 // soluble fraction // inferred from direct assay /// 5794 // Golgi apparatus // inferred from electronic annotation /// 16021 // integral to membrane // inferred from elect\*5515 // protein binding // inferred from sequence or structural similarity /// 8955 // peptidoglycan glycosyltransferase activity // inferred from direct assay /// 15020 // glucuronosyltransferase activity // inferred from direct assay /// 16740 // transf

207012\_at\*gb:U79292.1 /DB\_XREF=gi:1710273 /FEA=FLmRNA /CNT=23 /TID=Hs.90800.1 /TIER=Stack /STK=8 /UG=Hs.90800 /LL=4325 /UG\_GENE=MMP16 /UG\_TITLE=matrix metalloproteinase 16 (membrane-inserted) /DEF=Human clone 23734 mRNA sequence. /FL=gb:AB009303.1 gb:D83646.1 gb:D8\*0.283333623\*0.332531645\*..... 223704\_s\_at\*"gb:AF284225.1 /DB\_XREF=gi:9247124 /GEN=DMRT2 /FEA=FLmRNA /CNT=16 /TID=Hs.59506.0 /TIER=FL+Stack /STK=12 /UG=Hs.59506 /LL=10655 /DEF=Homo sapiens DMRT2terra-like protein (DMRT2) mRNA, complete cds, alternatively spliced. /PROD=DMRT2terra-like protein /FL=g"0.283042143\*0.245295245\*doublesex and mab-3 related transcription factor 2\*DMRT2\*Hs.59506\*ENSG00000173253\*"6350 // transcription // inferred from electronic annotation /// 6355 // regulation of transcription, DNA-dependent // inferred from electronic annotation /// 7530 // sex determination // traceable author statement /// 7548 // sex differentiation // infer"\*5634 // nucleus // inferred from electronic annotation\*3700 // transcription factor activity // inferred from electronic annotation /// 3700 // transcription factor activity // traceable author statement

229310\_at\*"gb:BE465475 /DB\_XREF=gi:9511250 /DB\_XREF=hw20g02.x1 /CLONE=IMAGE:3183506 /FEA=EST /CNT=20 /TID=Hs.272572.1 /TIER=Stack /STK=13 /UG=Hs.272572 /LL=3040 /UG\_GENE=HBA2 /UG\_TITLE=hemoglobin, alpha 2"\*0.282951148\*0.19812354\*kelch repeat and BTB (POZ) domain containing 9\*KBTBD9\*Hs.130593\*ENSG00000119771\*\*5634 // nucleus // inferred from electronic annotation\*5515 // protein binding // inferred from electronic annotation

203140\_at\*"gb:NM\_001706.1 /DB\_XREF=gi:4502382 /GEN=BCL6 /FEA=FLmRNA /CNT=123 /TID=Hs.155024.0 /TIER=FL+Stack /STK=54 /UG=Hs.155024 /LL=604 /DEF=Homo sapiens B-cell CLLlymphoma 6 (zinc finger protein 51) (BCL6), mRNA. /PROD=B-cell CLLlymphoma 6 (zinc finger protein 51)\*0.282179286\*0.351701201\*B-cell CLL/lymphoma 6 (zinc finger protein 51) /// B-cell CLL/lymphoma 6 (zinc finger protein 51)\*BCL6\*Hs.478588\*ENSG00000113916\*"122 // negative regulation of transcription from RNA polymerase II promoter // not recorded /// 6350 // transcription // inferred from electronic annotation /// 6355 // regulation of transcription, DNA-dependent // traceable author statement /// 6954 // i"\*119 // mediator complex // not recorded /// 5634 // nucleus // inferred from direct assay\*3700 // transcription factor activity // non-traceable author statement /// 5515 // protein binding // inferred from physical interaction /// 8270 // zinc ion binding // inferred from electronic annotation

204612\_at\*"gb:NM\_006823.1 /DB\_XREF=gi:5803126 /GEN=PKIA /FEA=FLmRNA /CNT=91 /TID=Hs.75209.0 /TIER=FL+Stack /STK=22 /UG=Hs.75209 /LL=5569 /DEF=Homo sapiens protein kinase (cAMP-dependent, catalytic) inhibitor alpha (PKIA), mRNA. /PROD=protein kinase, cAMP-dependent, "0.282028802\*0.313447206\*"protein kinase (cAMP-dependent, catalytic) inhibitor alpha"\*PKIA\*Hs.433700\*ENSG00000171033\*6469 // negative regulation of protein kinase activity // inferred from electronic annotation\*\*4862 // cAMP-dependent protein kinase inhibitor activity // inferred from electronic annotation

238432\_at\*gb:AI275162 /DB\_XREF=gi:3897436 /DB\_XREF=qw08b10.x1 /CLONE=IMAGE:1990459 /FEA=EST /CNT=14 /TID=Hs.93714.0 /TIER=ConsEnd /STK=0 /UG=Hs.93714 /UG\_TITLE=ESTs\*0.281777012\*0.293101967\*"CDNA FLJ35776 fis, clone TESTI2005326"\*Hs.19872\*.....

239492\_at\*gb:R12499 /DB\_XREF=gi:765575 /DB\_XREF=yf29g05.s1 /CLONE=IMAGE:128312 /FEA=EST /CNT=7 /TID=Hs.20468.0 /TIER=ConsEnd /STK=4 /UG=Hs.20468 /UG\_TITLE=ESTs\*0.280897327\*0.244814895\*SEC14-like 4 (S. cerevisiae)\*SEC14L4\*Hs.517541\*ENSG00000133488\*6810 // transport // inferred from electronic annotation /// 6886 // intracellular protein transport // inferred from electronic annotation\*5622 // intracellular // inferred from electronic annotation /// 16020 // membrane // inferred from electronic annotation\*5215 // transporter activity // inferred from electronic annotation /// 8289 // lipid binding // inferred from electronic annotation /// 8320 // protein carrier activity // inferred from electronic annotation

228245\_s\_at\*"gb:AW594320 /DB\_XREF=gi:7281578 /DB\_XREF=hg59d01.x1 /CLONE=IMAGE:2949889 /FEA=EST /CNT=39 /TID=Hs.110080.0 /TIER=Stack /STK=25 /UG=Hs.110080 /UG\_TITLE=ESTs, Weakly similar to S13495 pregnancy zone protein

(H.sapiens)"\*0.280756135\*0.281887755\*ovostatin  
2\*OVOS2\*Hs.524331\*ENSG00000177359\*\*\*4866 // endopeptidase inhibitor activity  
// inferred from electronic annotation  
225337\_at\*gb:AI346910 /DB\_XREF=gi:4084116 /DB\_XREF=qp59b12.x1  
/CLONE=IMAGE:1927295 /FEA=EST /CNT=101 /TID=Hs.9006.1 /TIER=Stack /STK=52  
/UG=Hs.9006 /LL=9218 /UG\_GENE=VAPA /UG\_TITLE=VAMP (vesicle-associated  
membrane protein)-associated protein A  
(33kD)\*0.280271993\*0.248267708\*Abhydrolase domain containing  
2\*ABHD2\*Hs.122337\*ENSG00000140526\*\*16021 // integral to membrane //  
non-traceable author statement\*3824 // catalytic activity // inferred from  
electronic annotation  
215501\_s\_at\*"gb:AK022513.1 /DB\_XREF=gi:10433943 /FEA=mRNA /CNT=3  
/TID=Hs.177534.1 /TIER=ConsEnd /STK=0 /UG=Hs.177534 /LL=11221 /UG\_GENE=DUSP10  
/UG\_TITLE=dual specificity phosphatase 10 /DEF=Homo sapiens cDNA FLJ12451  
fis, clone NT2RM1000377, highly similar to Homo  
sap"\*0.279882432\*0.290143771\*dual specificity phosphatase  
10\*DUSP10\*Hs.497822\*ENSG00000143507\*6470 // protein amino acid  
dephosphorylation // inferred from electronic annotation /// 6470 // protein  
amino acid dephosphorylation // traceable author statement /// 6950 //  
response to stress // traceable author statement /// 7254 // JNK cascade //  
trac\*5634 // nucleus // traceable author statement /// 5737 // cytoplasm //  
traceable author statement\*16787 // hydrolase activity // inferred from  
electronic annotation /// 17017 // MAP kinase phosphatase activity //  
inferred from electronic annotation  
228653\_at\*gb:AI700341 /DB\_XREF=gi:4988241 /DB\_XREF=wd06e10.x1  
/CLONE=IMAGE:2327370 /FEA=EST /CNT=23 /TID=Hs.110406.0 /TIER=Stack /STK=14  
/UG=Hs.110406 /UG\_TITLE=ESTs\*0.279784309\*0.146477606\*Similar to RIKEN cDNA  
E130306M17 gene\*\*Hs.269122\*\*\*\*  
227055\_at\*"gb:AI827972 /DB\_XREF=gi:5448730 /DB\_XREF=wk31c11.x1  
/CLONE=IMAGE:2413940 /FEA=EST /CNT=33 /TID=Hs.51483.0 /TIER=Stack /STK=18  
/UG=Hs.51483 /UG\_TITLE=ESTs, Weakly similar to hypothetical protein  
(H.sapiens)"\*0.279646268\*0.395524054\*hypothetical protein  
MGC17301\*MGC17301\*Hs.51483\*ENSG00000170439\*\*\*8757 //  
S-adenosylmethionine-dependent methyltransferase activity // inferred from  
electronic annotation /// 16740 // transferase activity // inferred from  
electronic annotation  
209312\_x\_at\*"gb:U65585.1 /DB\_XREF=gi:5478215 /GEN=HLA-DRB1 /FEA=FLmRNA  
/CNT=126 /TID=Hs.180255.0 /TIER=FL /STK=0 /UG=Hs.180255 /LL=3123 /DEF=Homo  
sapiens MHC class II antigen (HLA-DRB1) mRNA, HLA-DRB1\*PBL allele, complete  
cds. /PROD=MHC class II antigen  
/FL=gb:NM\_0021"\*0.279297569\*0.198766104\*"major histocompatibility complex,  
class II, DR beta 1 /// major histocompatibility complex, class II, DR beta  
1"\*HLA-DRB1\*Hs.520049\*ENSG00000196126\*"6955 // immune response // inferred  
from electronic annotation /// 19884 // antigen presentation, exogenous  
antigen // inferred from electronic annotation /// 19886 // antigen  
processing, exogenous antigen via MHC class II // inferred from electronic  
anno"\*16020 // membrane // inferred from electronic annotation /// 16021 //  
integral to membrane // inferred from electronic annotation\*45012 // MHC  
class II receptor activity // inferred from electronic annotation  
214770\_at\*gb:AI299239 /DB\_XREF=gi:3958893 /DB\_XREF=qn33g02.x1  
/CLONE=IMAGE:1900082 /FEA=mRNA /CNT=18 /TID=Hs.49.2 /TIER=ConsEnd /STK=1  
/UG=Hs.49 /LL=4481 /UG\_GENE=MSR1 /UG\_TITLE=macrophage scavenger receptor  
1\*0.278856486\*0.282990929\*macrophage scavenger receptor  
1\*MSR1\*Hs.446291\*ENSG00000038945\*6817 // phosphate transport // inferred from  
electronic annotation /// 6898 // receptor mediated endocytosis // inferred  
from electronic annotation /// 6898 // receptor mediated endocytosis //  
traceable author statement\*5737 // cytoplasm // inferred from electronic  
annotation /// 5887 // integral to plasma membrane // traceable author  
statement /// 16020 // membrane // inferred from electronic annotation\*4872  
// receptor activity // inferred from electronic annotation /// 5044 //  
scavenger receptor activity // inferred from electronic annotation /// 5044  
// scavenger receptor activity // traceable author statement /// 5319 //  
lipid transporter activity //  
205266\_at\*"gb:NM\_002309.2 /DB\_XREF=gi:6006018 /GEN=LIF /FEA=FLmRNA /CNT=44  
/TID=Hs.2250.0 /TIER=FL+Stack /STK=14 /UG=Hs.2250 /LL=3976 /DEF=Homo sapiens  
leukemia inhibitory factor (cholinergic differentiation factor) (LIF), mRNA.  
/PROD=leukemia inhibitory factor (cho"\*0.278067299\*0.278755455\*leukemia  
inhibitory factor (cholinergic differentiation  
factor)\*LIF\*Hs.2250\*ENSG00000128342\*6955 // immune response // inferred from  
electronic annotation /// 7166 // cell surface receptor linked signal  
transduction // not recorded /// 7267 // cell-cell signaling // not recorded  
/// 7275 // development // traceable author statement /// 8284 // p\*5615 //  
extracellular space // not recorded\*5125 // cytokine activity // inferred  
from electronic annotation /// 5146 // leukemia inhibitory factor receptor  
binding // not recorded /// 5147 // oncostatin-M receptor binding // not  
recorded /// 8083 // growth factor activity // inferred from electron  
231727\_s\_at\*"gb:NM\_020679.1 /DB\_XREF=gi:10190723 /GEN=AD023 /FEA=FLmRNA  
/CNT=9 /TID=Hs.325631.1 /TIER=FL /STK=1 /UG=Hs.325631 /LL=57409 /DEF=Homo  
sapiens AD023 protein (AD023), mRNA. /PROD=AD023 protein  
/FL=gb:NM\_020679.1"\*0.277366017\*0.26942769\*AD023  
protein\*AD023\*Hs.325631\*ENSG00000125457\*\*\*3723 // RNA binding // inferred

from electronic annotation  
244825\_at\*gb:AI005420 /DB\_XREF=gi:3214930 /DB\_XREF=ou08b08.x1  
/CLONE=IMAGE:1625655 /FEA=EST /CNT=4 /TID=Hs.130650.0 /TIER=ConsEnd /STK=3  
/UG=Hs.130650 /UG\_TITLE=ESTs\*0.275643018\*0.191345388\*KIAA1202  
protein\*KIAA1202\*Hs.420541\*ENSG00000158352\*\*\*5515 // protein binding //  
inferred from electronic annotation  
226777\_at\*gb:AA147933 /DB\_XREF=gi:1717306 /DB\_XREF=z150d02.s1  
/CLONE=IMAGE:505347 /FEA=EST /CNT=76 /TID=Hs.8895.0 /TIER=Stack /STK=28  
/UG=Hs.8895 /UG\_TITLE=ESTs\*0.27472012\*0.471959434\*A disintegrin and  
metalloproteinase domain 12 (meltrin  
alpha)\*ADAM12\*Hs.386283\*ENSG00000148848\*6508 // proteolysis and peptidolysis  
// inferred from electronic annotation /// 7155 // cell adhesion // inferred  
from electronic annotation /// 7520 // myoblast fusion // traceable author  
statement\*5886 // plasma membrane // traceable author statement /// 16021 //  
integral to membrane // inferred from electronic annotation\*4222 //  
metalloendopeptidase activity // inferred from electronic annotation /// 5515  
// protein binding // inferred from electronic annotation /// 8270 // zinc  
ion binding // inferred from electronic annotation  
214596\_at\*gb:T15991 /DB\_XREF=gi:518153 /DB\_XREF=IB2413 /FEA=FLmRNA /CNT=18  
/TID=Hs.7138.0 /TIER=ConsEnd /STK=1 /UG=Hs.7138 /LL=1131 /UG\_GENE=CHRM3  
/UG\_TITLE=cholinergic receptor, muscarinic 3  
/FL=gb:NM\_000740.1\*0.273789427\*0.396855444\*"cholinergic receptor, muscarinic  
3"\*CHRM3\*Hs.7138\*ENSG00000133019\*6464 // protein modification // traceable  
author statement /// 7165 // signal transduction // traceable author  
statement /// 7186 // G-protein coupled receptor protein signaling pathway //  
traceable author statement /// 7268 // synaptic transmission // in\*5886 //  
plasma membrane // traceable author statement /// 5887 // integral to plasma  
membrane // traceable author statement\*1584 // rhodopsin-like receptor  
activity // inferred from electronic annotation /// 4435 // phosphoinositide  
phospholipase C activity // traceable author statement /// 4872 // receptor  
activity // traceable author statement /// 4981 // muscarinic acetylch  
213988\_s\_at\*gb:BE971383 /DB\_XREF=gi:10584719 /DB\_XREF=601651561F1  
/CLONE=IMAGE:3934935 /FEA=EST /CNT=19 /TID=Hs.28491.3 /TIER=Stack /STK=17  
/UG=Hs.28491 /LL=6303 /UG\_GENE=SAT /UG\_TITLE=spermidinespermine  
N1-acetyltransferase\*0.273626687\*0.39933789\*spermidine/spermine  
N1-acetyltransferase\*SAT\*Hs.28491\*ENSG00000130066\*\*\*4145 // diamine  
N-acetyltransferase activity // traceable author statement /// 8415 //  
acyltransferase activity // inferred from electronic annotation /// 16740 //  
transferase activity // inferred from electronic annotation  
214787\_at\*gb:BE268538 /DB\_XREF=gi:9142145 /DB\_XREF=601125471F1  
/CLONE=IMAGE:3345232 /FEA=mRNA /CNT=18 /TID=Hs.135202.0 /TIER=ConsEnd /STK=0  
/UG=Hs.135202 /LL=10260 /UG\_GENE=IRLB /UG\_TITLE=c-myc promoter-binding  
protein\*0.273286293\*0.349535021\*c-myc promoter binding  
protein\*MYCPBP\*Hs.513817\*ENSG00000174485\*"6355 // regulation of  
transcription, DNA-dependent // non-traceable author statement"\*5634 //  
nucleus // non-traceable author statement\*3677 // DNA binding //  
non-traceable author statement  
204781\_s\_at\*gb:NM\_000043.1 /DB\_XREF=gi:4507582 /GEN=TNFRSF6 /FEA=FLmRNA  
/CNT=60 /TID=Hs.82359.0 /TIER=FL+Stack /STK=15 /UG=Hs.82359 /LL=355 /DEF=Homo  
sapiens tumor necrosis factor receptor superfamily, member 6 (TNFRSF6), mRNA.  
/PROD=apoptosis (APO-1) antigen 1 /FL=g\*"0.272839486\*0.290458845\*"Fas (TNF  
receptor superfamily, member 6)"\*FAS\*Hs.244139\*ENSG00000026103\*6461 //  
protein complex assembly // traceable author statement /// 6915 // apoptosis  
// inferred from electronic annotation /// 6916 // anti-apoptosis //  
traceable author statement /// 6917 // induction of apoptosis // traceable  
author statement /// 6955 \*5625 // soluble fraction // traceable author  
statement /// 5829 // cytosol // non-traceable author statement /// 16020 //  
membrane // inferred from electronic annotation /// 16021 // integral to  
membrane // inferred from electronic annotation\*4888 // transmembrane  
receptor activity // inferred from electronic annotation /// 5515 // protein  
binding // inferred from electronic annotation  
213142\_x\_at\*gb:AV700415 /DB\_XREF=gi:10302386 /DB\_XREF=AV700415  
/CLONE=GKCDGA04 /FEA=mRNA /CNT=62 /TID=Hs.12969.0 /TIER=Stack /STK=37  
/UG=Hs.12969 /LL=54103 /UG\_GENE=LOC54103 /UG\_TITLE=hypothetical  
protein\*0.272736215\*0.232942401\*hypothetical protein  
LOC54103\*LOC54103\*Hs.186649\*ENSG00000135174\*\*\*  
204364\_s\_at\*gb:BE535746 /DB\_XREF=gi:9764391 /DB\_XREF=601060419F1  
/CLONE=IMAGE:3446788 /FEA=FLmRNA /CNT=132 /TID=Hs.7358.0 /TIER=Stack /STK=31  
/UG=Hs.7358 /LL=65055 /UG\_GENE=FLJ13110 /UG\_TITLE=hypothetical protein  
FLJ13110 /FL=gb:NM\_022912.1\*0.272308449\*0.17901772\*chromosome 2 open reading  
frame 23\*C2orf23\*Hs.368884\*ENSG00000068615\*\*\*4872 // receptor activity //  
inferred from electronic annotation  
204670\_x\_at\*gb:NM\_002125.1 /DB\_XREF=gi:4504412 /GEN=HLA-DRB5 /FEA=FLmRNA  
/CNT=62 /TID=Hs.308026.0 /TIER=FL /STK=1 /UG=Hs.308026 /LL=3127 /DEF=Homo  
sapiens major histocompatibility complex, class II, DR beta 5 (HLA-DRB5),  
mRNA. /PROD=major histocompatibility complex,  
\*"0.271462746\*0.167047497\*"major histocompatibility complex, class II, DR  
beta 1"\*HLA-DRB1\*Hs.520049\*ENSG00000196126\*"6955 // immune response //  
inferred from electronic annotation /// 19884 // antigen presentation,  
exogenous antigen // inferred from electronic annotation /// 19886 // antigen  
processing, exogenous antigen via MHC class II // inferred from electronic

anno"•16020 // membrane // inferred from electronic annotation /// 16021 // integral to membrane // inferred from electronic annotation•45012 // MHC class II receptor activity // inferred from electronic annotation  
221815\_at•"gb:BE671816 /DB\_XREF=gi:10032446 /DB\_XREF=7a47d01.x1 /CLONE=IMAGE:3221857 /FEA=EST /CNT=71 /TID=Hs.21921.0 /TIER=Stack /STK=26 /UG=Hs.21921 /UG\_TITLE=ESTs, Moderately similar to AF119917 63 PRO2831 (H.sapiens)"•0.271109117•0.300796333•abhydrolase domain containing 2•ABHD2•Hs.122337•ENSG00000140526••16021 // integral to membrane // non-traceable author statement•3824 // catalytic activity // inferred from electronic annotation  
205743\_at•"gb:NM\_003149.1 /DB\_XREF=gi:4507246 /GEN=STAC /FEA=FLmRNA /CNT=30 /TID=Hs.56045.0 /TIER=FL+Stack /STK=12 /UG=Hs.56045 /LL=6769 /DEF=Homo sapiens src homology three (SH3) and cysteine rich domain (STAC), mRNA. /PROD=src homology three (SH3) and cysteine ric"•0.270141137•0.270483148•SH3 and cysteine rich domain•STAC•Hs.56045•ENSG00000144681•7242 // intracellular signaling cascade // inferred from electronic annotation•5625 // soluble fraction // traceable author statement•19992 // diacylglycerol binding // inferred from electronic annotation  
230363\_s\_at•gb:BE858808 /DB\_XREF=gi:10374225 /DB\_XREF=7f95h05.x1 /CLONE=IMAGE:3304761 /FEA=EST /CNT=15 /TID=Hs.52463.1 /TIER=Stack /STK=14 /UG=Hs.52463 /LL=22876 /UG\_GENE=KIAA0966 /UG\_TITLE=KIAA0966 protein•0.269685135•0.254600018•inositol polyphosphate-5-phosphatase F•INPP5F•Hs.369755•ENSG00000198825•••  
201744\_s\_at•"gb:NM\_002345.1 /DB\_XREF=gi:4505046 /GEN=LUM /FEA=FLmRNA /CNT=472 /TID=Hs.79914.0 /TIER=FL+Stack /STK=235 /UG=Hs.79914 /LL=4060 /DEF=Homo sapiens lumican (LUM), mRNA. /PROD=lumican /FL=gb:NM\_002345.1 gb:U18728.1 gb:U21128.1"•0.268363516•0.169181764•lumican•LUM•Hs.406475•ENSG00000139329•760 1 // visual perception // traceable author statement /// 30199 // collagen fibril organization // non-traceable author statement•5578 // extracellular matrix (sensu Metazoa) // traceable author statement /// 5583 // fibrillar collagen // inferred from direct assay•5201 // extracellular matrix structural constituent // non-traceable author statement /// 5518 // collagen binding // inferred from direct assay  
221802\_s\_at•gb:AU157109 /DB\_XREF=gi:11018630 /DB\_XREF=AU157109 /CLONE=PLACE1006159 /FEA=mRNA /CNT=94 /TID=Hs.23740.1 /TIER=Stack /STK=26 /UG=Hs.23740 /LL=57698 /UG\_GENE=KIAA1598 /UG\_TITLE=KIAA1598 protein•0.267646189•0.253759738•KIAA1598•KIAA1598•Hs.501140•ENSG00000187164•••  
211959\_at•gb:AW007532 /DB\_XREF=gi:5856310 /DB\_XREF=ws52h07.x1 /CLONE=IMAGE:2500861 /FEA=mRNA /CNT=430 /TID=Hs.103391.0 /TIER=Stack /STK=15 /UG=Hs.103391 /UG\_TITLE=Human insulin-like growth factor binding protein 5 (IGFBP5) mRNA•0.267225029•0.269734046•insulin-like growth factor binding protein 5•IGFBP5•Hs.369982•ENSG00000115461•1558 // regulation of cell growth // inferred from electronic annotation /// 7165 // signal transduction // non-traceable author statement•5576 // extracellular region // non-traceable author statement•5520 // insulin-like growth factor binding // inferred from electronic annotation  
205234\_at•"gb:NM\_004696.1 /DB\_XREF=gi:4759113 /GEN=SLC16A4 /FEA=FLmRNA /CNT=60 /TID=Hs.23590.0 /TIER=FL /STK=4 /UG=Hs.23590 /LL=9122 /DEF=Homo sapiens solute carrier family 16 (monocarboxylic acid transporters), member 4 (SLC16A4), mRNA. /PROD=solute carrier family "•0.266339873•0.353127336•"solute carrier family 16 (monocarboxylic acid transporters), member 4"•SLC16A4•Hs.351306•ENSG00000168679•6810 // transport // inferred from electronic annotation /// 15718 // monocarboxylic acid transport // traceable author statement•5624 // membrane fraction // traceable author statement /// 5887 // integral to plasma membrane // traceable author statement /// 16021 // integral to membrane // inferred from electronic annotation•5215 // transporter activity // inferred from electronic annotation /// 8028 // monocarboxylic acid transporter activity // traceable author statement /// 15293 // symporter activity // inferred from electronic annotation  
208306\_x\_at•"gb:NM\_021983.2 /DB\_XREF=gi:11875206 /GEN=HLA-DRB4 /FEA=FLmRNA /CNT=2 /TID=Hs.293934.0 /TIER=FL /STK=0 /UG=Hs.293934 /LL=3126 /DEF=Homo sapiens major histocompatibility complex, class II, DR beta 4 (HLA-DRB4), mRNA. /PROD=major histocompatibility complex, "•0.266282328•0.171698177•"Major histocompatibility complex, class II, DR beta 4"•HLA-DRB1•Hs.520049•ENSG00000196126•"6955 // immune response // inferred from electronic annotation /// 19884 // antigen presentation, exogenous antigen // inferred from electronic annotation /// 19886 // antigen processing, exogenous antigen via MHC class II // inferred from electronic anno"•16020 // membrane // inferred from electronic annotation /// 16021 // integral to membrane // inferred from electronic annotation•45012 // MHC class II receptor activity // inferred from electronic annotation  
230333\_at•gb:BE326919 /DB\_XREF=gi:9200695 /DB\_XREF=hr67f02.x1 /CLONE=IMAGE:3133563 /FEA=EST /CNT=14 /TID=Hs.28491.4 /TIER=Stack /STK=14 /UG=Hs.28491 /LL=6303 /UG\_GENE=SAT /UG\_TITLE=spermidinespermine N1-acetyltransferase•0.265287619•0.407840509•Spermidine/spermine N1-acetyltransferase•SAT•Hs.28491•ENSG00000130066•••4145 // diamine N-acetyltransferase activity // traceable author statement /// 8415 // acyltransferase activity // inferred from electronic annotation /// 16740 // transferase activity // inferred from electronic annotation  
219922\_s\_at•"gb:NM\_021070.1 /DB\_XREF=gi:10835104 /GEN=LTBP3 /FEA=FLmRNA

/CNT=18 /TID=Hs.289019.0 /TIER=FL /STK=0 /UG=Hs.289019 /LL=4054 /DEF=Homo sapiens latent transforming growth factor beta binding protein 3 (LTBP3), mRNA. /PROD=latent transforming growth factor be"0.265152268\*0.38770538\*latent transforming growth factor beta binding protein 3\*LTBP3\*Hs.289019\*ENSG00000168056\*\*\*5509 // calcium ion binding // inferred from electronic annotation /// 19838 // growth factor binding // inferred from electronic annotation

204836\_at\*"gb:NM\_000170.1 /DB\_XREF=gi:4504012 /GEN=GLDC /FEA=FLmRNA /CNT=59 /TID=Hs.27.0 /TIER=FL+Stack /STK=26 /UG=Hs.27 /LL=2731 /DEF=Homo sapiens glycine dehydrogenase (decarboxylating; glycine decarboxylase, glycine cleavage system protein P) (GLDC), mRNA. /PROD"0.264783188\*0.230959896\*"glycine dehydrogenase (decarboxylating; glycine decarboxylase, glycine cleavage system protein P)"\*GLDC\*Hs.149156\*\*6546 // glycine catabolism // traceable author statement\*5739 // mitochondrion // inferred from electronic annotation /// 5961 // glycine dehydrogenase complex (decarboxylating) // inferred from electronic annotation\*4375 // glycine dehydrogenase (decarboxylating) activity // traceable author statement /// 5489 // electron transporter activity // traceable author statement /// 16491 // oxidoreductase activity // inferred from electronic annotation

208729\_x\_at\*"gb:D83043.1 /DB\_XREF=gi:1871135 /GEN=HLA-B /FEA=FLmRNA /CNT=488 /TID=Hs.77961.1 /TIER=FL /STK=0 /UG=Hs.77961 /LL=3106 /UG\_TITLE=major histocompatibility complex, class I, B /DEF=Human HLA-B mRNA, allele A\*2711, complete cds. /FL=gb:U50710.1 gb:U01848.1 gb"0.263802283\*0.241195431\*"major histocompatibility complex, class I, B"\*HLA-B\*Hs.77961\*ENSG00000198638\*"19883 // antigen presentation, endogenous antigen // inferred from electronic annotation /// 19885 // antigen processing, endogenous antigen via MHC class I // inferred from electronic annotation"\*5887 // integral to plasma membrane // non-traceable author statement /// 16021 // integral to membrane // inferred from electronic annotation /// 42612 // MHC class I protein complex // inferred from electronic annotation\*30106 // MHC class I receptor activity // inferred from electronic annotation /// 30106 // MHC class I receptor activity // non-traceable author statement

230538\_at\*gb:AI027957 /DB\_XREF=gi:3245266 /DB\_XREF=ov84c05.x1 /CLONE=IMAGE:1644008 /FEA=EST /CNT=16 /TID=Hs.121005.0 /TIER=Stack /STK=12 /UG=Hs.121005 /UG\_TITLE=ESTs\*0.261721578\*0.3877819\*rai-like protein\*RaLP\*Hs.552630\*ENSG00000185634\*7242 // intracellular signaling cascade // inferred from electronic annotation\*\*

226925\_at\*gb:AW069729 /DB\_XREF=gi:6024727 /DB\_XREF=cr51d05.x1 /CLONE=HBMSC\_cr51d05 /FEA=mRNA /CNT=35 /TID=Hs.37443.0 /TIER=Stack /STK=17 /UG=Hs.37443 /UG\_TITLE=Homo sapiens mRNA; cDNA DKFZp434B2119 (from clone DKFZp434B2119); partial cds\*0.261433584\*0.241512563\*acid phosphatase-like 2\*ACPL2\*Hs.255491\*ENSG00000155893\*\*\*3993 // acid phosphatase activity // inferred from electronic annotation

202340\_x\_at\*"gb:NM\_002135.1 /DB\_XREF=gi:4504440 /GEN=NR4A1 /FEA=FLmRNA /CNT=145 /TID=Hs.1119.0 /TIER=FL+Stack /STK=57 /UG=Hs.1119 /LL=3164 /DEF=Homo sapiens nuclear receptor subfamily 4, group A, member 1 (NR4A1), mRNA. /PROD=nuclear receptor subfamily 4, group A, mem"0.260119832\*0.237116468\*"nuclear receptor subfamily 4, group A, member 1"\*NR4A1\*Hs.524430\*ENSG00000123358\*"6350 // transcription // inferred from electronic annotation /// 6355 // regulation of transcription, DNA-dependent // inferred from electronic annotation /// 7165 // signal transduction // traceable author statement"\*5634 // nucleus // inferred from electronic annotation\*3700 // transcription factor activity // inferred from electronic annotation /// 3707 // steroid hormone receptor activity // inferred from electronic annotation /// 4879 // ligand-dependent nuclear receptor activity // inferred from electronic annotation

225327\_at\*"gb:AB037791.1 /DB\_XREF=gi:7243120 /GEN=KIAA1370 /FEA=mRNA /CNT=93 /TID=Hs.29716.0 /TIER=Stack /STK=15 /UG=Hs.29716 /LL=56204 /DEF=Homo sapiens mRNA for KIAA1370 protein, partial cds. /PROD=KIAA1370 protein"0.259214141\*0.407698922\*hypothetical protein FLJ10980\*FLJ10980\*Hs.152385\*ENSG00000047346\*\*\*

215193\_x\_at\*"gb:AJ297586.1 /DB\_XREF=gi:10185079 /GEN=HLA-DRB1 /FEA=mRNA /CNT=7 /TID=Hs.279930.1 /TIER=ConsEnd /STK=0 /UG=Hs.279930 /LL=3125 /DEF=Homo sapiens mRNA for MHC class II antigen (HLA-DRB1 gene), DRB1\*0402 allele. /PROD=MHC class II antigen"0.257766347\*0.170593997\*"major histocompatibility complex, class II, DR beta 1"\*HLA-DRB1\*Hs.520049\*ENSG00000196126\*"6955 // immune response // inferred from electronic annotation /// 19884 // antigen presentation, exogenous antigen // inferred from electronic annotation /// 19886 // antigen processing, exogenous antigen via MHC class II // inferred from electronic anno"\*16020 // membrane // inferred from electronic annotation /// 16021 // integral to membrane // inferred from electronic annotation\*45012 // MHC class II receptor activity // inferred from electronic annotation

238935\_at\*"gb:AW958475 /DB\_XREF=gi:8148159 /DB\_XREF=EST370545 /FEA=EST /CNT=7 /TID=Hs.293947.0 /TIER=ConsEnd /STK=0 /UG=Hs.293947 /UG\_TITLE=ESTs, Weakly similar to I38022 hypothetical protein (H.sapiens)"0.257176254\*0.286609611\*Ribosomal protein S27-like\*RPS27L\*Hs.108957\*ENSG00000185088\*6412 // protein biosynthesis // inferred from electronic annotation\*5840 // ribosome // inferred from electronic annotation\*3735 // structural constituent of ribosome // inferred

from electronic annotation  
1563498\_s\_at\*gb:AK090434.1 /DB\_XREF=gi:21748555 /TID=Hs2.407102.1 /CNT=1  
/FEA=mRNA /TIER=ConsEnd /STK=0 /UG=Hs.407102 /UG\_TITLE=Homo sapiens mRNA for  
FLJ00351 protein. /DEF=Homo sapiens mRNA for FLJ00351  
protein.\*0.253759538\*0.438626825\*hypothetical protein  
LOC283130\*LOC283130\*Hs.435510\*ENSG00000162241\*6810 // transport // inferred  
from electronic annotation\*5743 // mitochondrial inner membrane // inferred  
from electronic annotation /// 16020 // membrane // inferred from electronic  
annotation\*5215 // transporter activity // inferred from electronic  
annotation /// 5488 // binding // inferred from electronic annotation  
203628\_at\*gb:H05812 /DB\_XREF=gi:869364 /DB\_XREF=y177f04.s1 /CLONE=IMAGE:44149  
/FEA=FLmRNA /CNT=95 /TID=Hs.239176.0 /TIER=Stack /STK=24 /UG=Hs.239176  
/LL=3480 /UG\_GENE=IGF1R /UG\_TITLE=insulin-like growth factor 1 receptor  
/FL=gb:NM\_000875.2\*0.25302582\*0.247385627\*insulin-like growth factor 1  
receptor\*IGF1R\*Hs.20573\*ENSG00000140443\*74 // regulation of cell cycle //  
traceable author statement /// 6468 // protein amino acid phosphorylation //  
inferred from electronic annotation /// 6916 // anti-apoptosis // traceable  
author statement /// 7165 // signal transduction // traceable author\*16020 //  
membrane // inferred from electronic annotation /// 16021 // integral to  
membrane // inferred from electronic annotation\*4872 // receptor activity //  
inferred from electronic annotation /// 5006 // epidermal growth factor  
receptor activity // inferred from electronic annotation /// 5010 //  
insulin-like growth factor receptor activity // traceable author statement  
/// 5515 /  
205428\_s\_at\*"gb:NM\_001740.2 /DB\_XREF=gi:6031158 /GEN=CALB2 /FEA=FLmRNA  
/CNT=36 /TID=Hs.106857.0 /TIER=FL+Stack /STK=15 /UG=Hs.106857 /LL=794  
/DEF=Homo sapiens calbindin 2, (29kD, calretinin) (CALB2), transcript variant  
CALB2, mRNA. /PROD=calbindin 2, full length  
prote"\*0.250640444\*0.245213116\*"calbindin 2, 29kDa  
(calretinin)"\*CALB2\*Hs.106857\*ENSG00000172137\*5509 // calcium ion binding  
// inferred from electronic annotation /// 5509 // calcium ion binding // not  
recorded  
226731\_at\*gb:AA156873 /DB\_XREF=gi:1728488 /DB\_XREF=z120h08.s1  
/CLONE=IMAGE:502527 /FEA=EST /CNT=65 /TID=Hs.184411.5 /TIER=Stack /STK=43  
/UG=Hs.184411 /LL=213 /UG\_GENE=ALB  
/UG\_TITLE=albumin\*0.250567439\*0.307572375\*"Integrin, alpha  
1"\*PELO\*Hs.519304\*ENSG00000152684\*6412 // protein biosynthesis // inferred  
from electronic annotation\*5634 // nucleus // inferred from electronic  
annotation\*  
211799\_x\_at\*"gb:U62824.1 /DB\_XREF=gi:1575443 /GEN=HLA-Cw\*1701 /FEA=FLmRNA  
/CNT=5 /TID=Hs.287811.0 /TIER=FL /STK=0 /UG=Hs.287811 /DEF=Homo sapiens HLA  
class I heavy chain (HLA-Cw\*1701) mRNA, complete cds. /PROD=HLA class I heavy  
chain /FL=gb:U62824.1\*0.249968844\*0.338861617\*"Major histocompatibility  
complex, class I, C"\*HLA-C\*Hs.534125\*ENSG00000198479\*19882 // antigen  
presentation // inferred from electronic annotation /// 19883 // antigen  
presentation, endogenous antigen // inferred from electronic annotation ///  
19885 // antigen processing, endogenous antigen via MHC class I // inferred  
from electron\*5887 // integral to plasma membrane // non-traceable author  
statement /// 16020 // membrane // non-traceable author statement /// 16021  
// integral to membrane // inferred from electronic annotation /// 42612 //  
MHC class I protein complex // inferred fro\*30106 // MHC class I receptor  
activity // inferred from electronic annotation /// 30106 // MHC class I  
receptor activity // non-traceable author statement /// 45012 // MHC class II  
receptor activity // non-traceable author statement  
201926\_s\_at\*"gb:BC001288.1 /DB\_XREF=gi:12654888 /FEA=FLmRNA /CNT=314  
/TID=Hs.1369.0 /TIER=FL /STK=0 /UG=Hs.1369 /LL=1604 /UG\_GENE=DAF /DEF=Homo  
sapiens, Similar to decay accelerating factor for complement (CD55, Cromer  
blood group system), clone MGC:5192, mRNA,  
comple"\*0.249576464\*0.15250219\*"decay accelerating factor for complement  
(CD55, Cromer blood group system)"\*DAF\*Hs.527653\*ENSG00000196352\*6955 //  
immune response // inferred from electronic annotation /// 6958 // complement  
activation, classical pathway // inferred from electronic annotation\*5625 //  
soluble fraction // traceable author statement /// 5887 // integral to plasma  
membrane // traceable author statement /// 16020 // membrane // inferred from  
electronic annotation\*  
1554352\_s\_at\*"gb:BC041706.1 /DB\_XREF=gi:27469518 /TID=Hs2.145631.1 /CNT=3  
/FEA=FLmRNA /TIER=FL /STK=2 /LL=10260 /UG\_GENE=IRLB /UG=Hs.145631 /DEF=Homo  
sapiens, Similar to KIAA0476 gene product, clone MGC:48955 IMAGE:5530033,  
mRNA, complete cds. /PROD=Similar to KIAA0476\*0.249388797\*0.304021065\*c-myc  
promoter binding protein\*MYCPBP\*Hs.513817\*ENSG00000174485\*6355 // regulation  
of transcription, DNA-dependent // non-traceable author statement\*5634 //  
nucleus // non-traceable author statement\*3677 // DNA binding //  
non-traceable author statement  
212158\_at\*"gb:AL577322 /DB\_XREF=gi:12940338 /DB\_XREF=AL577322  
/CLONE=CS0DI085YI06 (3 prime) /FEA=mRNA /CNT=306 /TID=Hs.1501.0 /TIER=Stack  
/STK=61 /UG=Hs.1501 /LL=6383 /UG\_GENE=SDC2 /UG\_TITLE=syndecan 2 (heparan  
sulfate proteoglycan 1, cell surface-associated,  
fibrog"\*0.249284714\*0.158688429\*"syndecan 2 (heparan sulfate proteoglycan 1,  
cell surface-associated, fibroglycan)"\*SDC2\*Hs.1501\*ENSG00000169439\*5887 //  
integral to plasma membrane // non-traceable author statement /// 16020 //  
membrane // inferred from electronic annotation\*8092 // cytoskeletal protein

binding // inferred from electronic annotation  
1561757\_a\_at\*"gb:BC035922.1 /DB\_XREF=gi:23273119 /TID=Hs2.123542.1 /CNT=1  
/FEA=mRNA /TIER=ConsEnd /STK=1 /UG=Hs.123542 /UG\_TITLE=Homo sapiens, clone  
IMAGE:4639114, mRNA /DEF=Homo sapiens, clone IMAGE:5398658,  
mRNA."\*0.2492339\*0.345535048\*hypothetical protein  
LOC283352\*LOC283352\*Hs.507268\*\*\*\*  
219978\_s\_at\*"gb:NM\_018454.1 /DB\_XREF=gi:8922094 /GEN=BM037 /FEA=FLmRNA  
/CNT=12 /TID=Hs.283649.0 /TIER=FL /STK=1 /UG=Hs.283649 /LL=55838 /DEF=Homo  
sapiens uncharacterized bone marrow protein BM037 (BM037), mRNA.  
/PROD=uncharacterized bone marrow protein BM037  
/FL=gb:AF"\*0.248857912\*0.214940836\*nucleolar and spindle associated protein  
1\*NUSAP1\*Hs.511093\*ENSG00000137804\*\*5634 // nucleus // inferred from  
electronic annotation\*  
203072\_at\*"gb:NM\_004998.1 /DB\_XREF=gi:4826843 /GEN=MYO1C /FEA=FLmRNA /CNT=121  
/TID=Hs.82251.0 /TIER=FL /STK=2 /UG=Hs.82251 /LL=4641 /DEF=Homo sapiens  
myosin IC (MYO1C), mRNA. /PROD=myosin IC /FL=gb:U14391.1  
gb:NM\_004998.1"\*0.2481883\*0.300960432\*myosin  
IE\*MYO1E\*Hs.370392\*ENSG00000157483\*30048 // actin filament-based movement //  
traceable author statement\*16459 // myosin // inferred from electronic  
annotation\*146 // microfilament motor activity // traceable author statement  
/// 3779 // actin binding // inferred from electronic annotation /// 5516 //  
calmodulin binding // inferred from electronic annotation /// 5524 // ATP  
binding // inferred from electronic an  
223524\_s\_at\*"gb:BC000568.1 /DB\_XREF=gi:12653584 /FEA=FLmRNA /CNT=57  
/TID=Hs.280740.0 /TIER=FL /STK=0 /UG=Hs.280740 /LL=66000 /UG\_GENE=MGC3040  
/DEF=Homo sapiens, clone MGC:3040, mRNA, complete cds. /PROD=Unknown (protein  
for MGC:3040) /FL=gb:BC000568.1"\*0.247286627\*0.129843044\*hypothetical protein  
MGC3040\*MGC3040\*Hs.191616\*ENSG00000144868\*\*\*\*  
216252\_x\_at\*gb:Z70519.1 /DB\_XREF=gi:1418817 /FEA=mRNA /CNT=3 /TID=Hs.82359.1  
/TIER=ConsEnd /STK=0 /UG=Hs.82359 /LL=355 /UG\_GENE=TNFRSF6 /DEF=H.sapiens  
FASAp0 1 mRNA for FAS soluble protein (clone FAS Exo4Del). /PROD=FAS soluble  
protein\*0.246726829\*0.184439289\*"Fas (TNF receptor superfamily, member  
6)"\*FAS\*Hs.244139\*ENSG00000026103\*6461 // protein complex assembly //  
traceable author statement /// 6915 // apoptosis // inferred from electronic  
annotation /// 6916 // anti-apoptosis // traceable author statement /// 6917  
// induction of apoptosis // traceable author statement /// 6955 \*5625 //  
soluble fraction // traceable author statement /// 5829 // cytosol //  
non-traceable author statement /// 16020 // membrane // inferred from  
electronic annotation /// 16021 // integral to membrane // inferred from  
electronic annotation\*4888 // transmembrane receptor activity // inferred  
from electronic annotation /// 5515 // protein binding // inferred from  
electronic annotation  
230362\_at\*gb:BE858808 /DB\_XREF=gi:10374225 /DB\_XREF=7f95h05.x1  
/CLONE=IMAGE:3304761 /FEA=EST /CNT=15 /TID=Hs.52463.1 /TIER=Stack /STK=14  
/UG=Hs.52463 /LL=22876 /UG\_GENE=KIAA0966 /UG\_TITLE=KIAA0966  
protein\*0.246346175\*0.072948165\*inositol polyphosphate-5-phosphatase  
F\*INPP5F\*Hs.369755\*ENSG00000198825\*\*\*\*  
224963\_at\*"gb:AK025078.1 /DB\_XREF=gi:10437520 /FEA=mRNA /CNT=144  
/TID=Hs.302738.0 /TIER=Stack /STK=39 /UG=Hs.302738 /UG\_TITLE=Homo sapiens  
cDNA: FLJ21425 fis, clone COL04162 /DEF=Homo sapiens cDNA: FLJ21425 fis,  
clone COL04162."\*0.246098241\*0.257535484\*"solute carrier family 26 (sulfate  
transporter), member 2"\*SLC26A2\*Hs.302738\*ENSG00000155850\*6810 // transport  
// inferred from electronic annotation /// 8272 // sulfate transport //  
traceable author statement\*5624 // membrane fraction // traceable author  
statement /// 5887 // integral to plasma membrane // traceable author  
statement /// 16020 // membrane // inferred from electronic annotation\*8271  
// sulfate porter activity // inferred from electronic annotation  
235275\_at\*gb:AA610122 /DB\_XREF=gi:2458550 /DB\_XREF=af19h06.s1  
/CLONE=IMAGE:1032155 /FEA=EST /CNT=13 /TID=Hs.112819.0 /TIER=ConsEnd /STK=6  
/UG=Hs.112819 /UG\_TITLE=ESTs\*0.244472238\*0.183719027\*Bone morphogenetic  
protein 8b (osteogenic protein 2)\*BMP8B\*Hs.409964\*ENSG00000116985\*1501 //  
skeletal development // traceable author statement /// 30154 // cell  
differentiation // inferred from electronic annotation /// 40007 // growth //  
inferred from electronic annotation\*5576 // extracellular region // inferred  
from electronic annotation\*5125 // cytokine activity // inferred from  
electronic annotation /// 8083 // growth factor activity // inferred from  
electronic annotation  
40560\_at\*"Cluster Incl. U28049:Human TBX2 (TXB2) mRNA, complete cds  
/cds=(47,2155) /gb=U28049 /gi=924927 /ug=Hs.168357  
/len=2279"\*0.24444769\*0.190152728\*T-box  
2\*TBX2\*Hs.531085\*ENSG00000121068\*"6350 // transcription // inferred from  
electronic annotation /// 6355 // regulation of transcription, DNA-dependent  
// inferred from electronic annotation /// 7275 // development // inferred  
from electronic annotation"\*5634 // nucleus // inferred from electronic  
annotation\*3700 // transcription factor activity // inferred from electronic  
annotation  
209417\_s\_at\*"gb:BC001356.1 /DB\_XREF=gi:12655016 /FEA=FLmRNA /CNT=99  
/TID=Hs.50842.0 /TIER=FL+Stack /STK=52 /UG=Hs.50842 /LL=3430 /UG\_GENE=IFI35  
/DEF=Homo sapiens, Similar to interferon-induced protein 35, clone MGC:2935,  
mRNA, complete cds. /PROD=Similar to  
interferon"\*0.243990589\*0.123884812\*interferon-induced protein



35•IFI35•Hs.50842•ENSG00000068079•6955 // immune response // non-traceable  
author statement /// 9615 // response to virus // non-traceable author  
statement•5634 // nucleus // inferred from direct assay•5515 // protein  
binding // inferred from physical interaction  
211026\_s\_at•"gb:BC006230.1 /DB\_XREF=gi:13623260 /FEA=FLmRNA /CNT=1  
/TID=HsAffx.900931.246 /TIER=FL /STK=0 /DEF=Homo sapiens,  
lysophospholipase-like, clone MGC:10338, mRNA, complete cds.  
/PROD=lysophospholipase-like  
/FL=gb:BC006230.1"•0.243837876•0.435641148•monoglyceride lipase ///  
monoglyceride lipase•MGLL•Hs.277035•ENSG00000074416•6629 // lipid metabolism  
// traceable author statement /// 6725 // aromatic compound metabolism //  
inferred from electronic annotation /// 6954 // inflammatory response //  
traceable author statement••4622 // lysophospholipase activity // traceable  
author statement /// 4759 // serine esterase activity // inferred from  
electronic annotation /// 16787 // hydrolase activity // inferred from  
electronic annotation /// 47372 // acylglycerol lipase activity /  
64942\_at•"Cluster Incl. AI937160:wp73h02.x1 Homo sapiens cDNA, 3 end  
/clone=IMAGE-2467443 /clone\_end=3 /gb=AI937160 /gi=5676030 /ug=Hs.7967  
/len=552"•0.242757074•0.210976831•G protein-coupled receptor  
153•GPR153•Hs.531581•ENSG00000158292•7186 // G-protein coupled receptor  
protein signaling pathway // inferred from electronic annotation•16021 //  
integral to membrane // inferred from electronic annotation•1584 //  
rhodopsin-like receptor activity // inferred from electronic annotation ///  
4872 // receptor activity // inferred from electronic annotation  
211911\_x\_at•"gb:L07950.1 /DB\_XREF=gi:307236 /GEN=HLA-B /FEA=FLmRNA /CNT=1  
/TID=HsAffx.900418.1142 /TIER=FL /STK=0 /DEF=Homo sapiens MHC class I HLA B71  
mRNA, complete cds. /PROD=MHC HLA B71  
/FL=gb:L07950.1"•0.242419029•0.237105221•"major histocompatibility complex,  
class I, B /// major histocompatibility complex, class I,  
B"•HLA-B•Hs.77961•ENSG00000198638"19883 // antigen presentation, endogenous  
antigen // inferred from electronic annotation /// 19885 // antigen  
processing, endogenous antigen via MHC class I // inferred from electronic  
annotation"•5887 // integral to plasma membrane // non-traceable author  
statement /// 16021 // integral to membrane // inferred from electronic  
annotation /// 42612 // MHC class I protein complex // inferred from  
electronic annotation•30106 // MHC class I receptor activity // inferred from  
electronic annotation /// 30106 // MHC class I receptor activity //  
non-traceable author statement  
210145\_at•"gb:M68874.1 /DB\_XREF=gi:190003 /GEN=cPLA2 /FEA=FLmRNA /CNT=23  
/TID=Hs.211587.0 /TIER=FL+Stack /STK=10 /UG=Hs.211587 /LL=5321 /DEF=Homo  
sapiens phosphatidylcholine 2-acylhydrolase (cPLA2) mRNA, complete cds.  
/PROD=phosphatidylcholine 2-acylhydrolase  
/FL=gb"•0.241909878•0.382865424•"phospholipase A2, group IVA (cytosolic,  
calcium-dependent)"•PLA2G4A•Hs.497200•ENSG00000116711•6663 // platelet  
activating factor biosynthesis // non-traceable author statement /// 6690 //  
icosanoid metabolism // non-traceable author statement /// 9395 //  
phospholipid catabolism // inferred from electronic annotation /// 16042 //  
lipid catabolism /•5829 // cytosol // non-traceable author statement ///  
16021 // integral to membrane // non-traceable author statement•4622 //  
lysophospholipase activity // inferred from electronic annotation /// 4623 //  
phospholipase A2 activity // non-traceable author statement /// 16787 //  
hydrolase activity // inferred from electronic annotation  
202489\_s\_at•"gb:BC005238.1 /DB\_XREF=gi:13528881 /FEA=FLmRNA /CNT=217  
/TID=Hs.301350.0 /TIER=FL+Stack /STK=76 /UG=Hs.301350 /LL=5349 /UG\_GENE=FXVD3  
/DEF=Homo sapiens, FXVD domain-containing ion transport regulator 3, clone  
MGC:12265, mRNA, complete cds. /PROD=FXVD doma"•0.240405886•0.140433152•FXVD  
domain containing ion transport regulator  
3•FXVD3•Hs.301350•ENSG00000089356•6811 // ion transport // inferred from  
electronic annotation /// 6821 // chloride transport // traceable author  
statement•5887 // integral to plasma membrane // traceable author statement  
/// 16020 // membrane // inferred from electronic annotation•5216 // ion  
channel activity // inferred from electronic annotation /// 5254 // chloride  
channel activity // traceable author statement  
202718\_at•"gb:NM\_000597.1 /DB\_XREF=gi:10835156 /GEN=IGFBP2 /FEA=FLmRNA  
/CNT=257 /TID=Hs.162.0 /TIER=FL+Stack /STK=153 /UG=Hs.162 /LL=3485 /DEF=Homo  
sapiens insulin-like growth factor binding protein 2 (36kD) (IGFBP2), mRNA.  
/PROD=insulin-like growth factor binding  
p"•0.23997716•0.144312147•"insulin-like growth factor binding protein 2,  
36kDa"•IGFBP2•Hs.438102•ENSG00000115457•1558 // regulation of cell growth //  
inferred from electronic annotation•5615 // extracellular space // not  
recorded•5520 // insulin-like growth factor binding // inferred from  
electronic annotation  
222150\_s\_at•"gb:AK026747.1 /DB\_XREF=gi:10439670 /FEA=mRNA /CNT=9  
/TID=Hs.12969.1 /TIER=ConsEnd /STK=0 /UG=Hs.12969 /LL=54103 /UG\_GENE=LOC54103  
/UG\_TITLE=hypothetical protein /DEF=Homo sapiens cDNA: FLJ23094 fis, clone  
LNG07379, highly similar to HST000007 Homo  
sapiens"•0.239901361•0.183441665•hypothetical protein  
LOC54103•LOC54103•Hs.186649•ENSG00000135174•••  
63825\_at•"Cluster Incl. AI557319:PT2.1\_16\_F08.r Homo sapiens cDNA, 3 end  
/clone\_end=3 /gb=AI557319 /gi=4489682 /ug=Hs.21921  
/len=876"•0.239812714•0.375049527•abhydrolase domain containing

2•ABHD2•Hs.122337•ENSG00000140526••16021 // integral to membrane // non-traceable author statement•3824 // catalytic activity // inferred from electronic annotation  
226939\_at•gb:AI202327 /DB\_XREF=gi:3754933 /DB\_XREF=qs66a07.x1 /CLONE=IMAGE:1943028 /FEA=EST /CNT=33 /TID=Hs.44833.0 /TIER=Stack /STK=12 /UG=Hs.44833 /UG\_TITLE=ESTs•0.237638829•0.162475906•cytoplasmic polyadenylation element binding protein  
2•CPEB2•Hs.374216•ENSG00000137449•••166 // nucleotide binding // inferred from electronic annotation /// 3676 // nucleic acid binding // inferred from electronic annotation  
235534\_at•"gb:AI624156 /DB\_XREF=gi:4649087 /DB\_XREF=ts26f03.x1 /CLONE=IMAGE:2229725 /FEA=EST /CNT=10 /TID=Hs.153944.0 /TIER=ConsEnd /STK=1 /UG=Hs.153944 /UG\_TITLE=ESTs, Weakly similar to ALUA\_HUMAN !!!! ALU CLASS A WARNING ENTRY !!! (H.sapiens)"•0.237428661•0.243041341•"Transcribed locus, weakly similar to NP\_872301.1 hypothetical protein FLJ25224 [Homo sapiens]"••Hs.153944••••  
208235\_x\_at•"gb:NM\_021123.1 /DB\_XREF=gi:11024640 /GEN=GAGE7 /FEA=FLmRNA /CNT=2 /TID=Hs.278606.0 /TIER=FL /STK=0 /UG=Hs.278606 /LL=2579 /DEF=Homo sapiens G antigen 7 (GAGE7), mRNA. /PROD=G antigen 7 /FL=gb:NM\_021123.1 gb:AF058988.1"•0.236529938•0.305737003•G antigen 5 /// G antigen 7 /// G antigen 7B•GAGE5 /// GAGE7 /// GAGE7B•Hs.278606•ENSG00000189064 /// ENSG00000198716••••  
232504\_at•gb:AL389942.1 /DB\_XREF=gi:9367848 /FEA=mRNA /CNT=6 /TID=Hs.157752.0 /TIER=ConsEnd /STK=3 /UG=Hs.157752 /UG\_TITLE=Homo sapiens mRNA full length insert cDNA clone EUROIMAGE 2005635 /DEF=Homo sapiens mRNA full length insert cDNA clone EUROIMAGE 2005635.0.235807027•0.197553642•hypothetical protein LOC285628•LOC285628•Hs.406790••••  
212154\_at•"gb:AI380298 /DB\_XREF=gi:4190151 /DB\_XREF=tf99h06.x1 /CLONE=IMAGE:2107451 /FEA=mRNA /CNT=306 /TID=Hs.1501.0 /TIER=Stack /STK=12 /UG=Hs.1501 /LL=6383 /UG\_GENE=SDC2 /UG\_TITLE=syndecan 2 (heparan sulfate proteoglycan 1, cell surface-associated, fibroglycan)"•0.23434024•0.162969885•"syndecan 2 (heparan sulfate proteoglycan 1, cell surface-associated, fibroglycan)"•SDC2•Hs.1501•ENSG00000169439••5887 // integral to plasma membrane // non-traceable author statement /// 16020 // membrane // inferred from electronic annotation•8092 // cytoskeletal protein binding // inferred from electronic annotation  
210592\_s\_at•"gb:M55580.1 /DB\_XREF=gi:338335 /GEN=spermidinespermine N1-acetyltransferase /FEA=FLmRNA /CNT=8 /TID=Hs.28491.1 /TIER=FL /STK=0 /UG=Hs.28491 /LL=6303 /DEF=Human spermidinespermine N1-acetyltransferase mRNA, complete cds. /PROD=spermidinespermine N1-acetyltransferase /SAT•Hs.28491•ENSG00000130066•••4145 // diamine N-acetyltransferase activity // traceable author statement /// 8415 // acyltransferase activity // inferred from electronic annotation /// 16740 // transferase activity // inferred from electronic annotation  
213164\_at•"gb:AI867198 /DB\_XREF=gi:5540214 /DB\_XREF=wa01c11.x1 /CLONE=IMAGE:2296820 /FEA=FLmRNA /CNT=70 /TID=Hs.324787.0 /TIER=Stack /STK=17 /UG=Hs.324787 /LL=6526 /UG\_GENE=SLC5A3 /UG\_TITLE=solute carrier family 5 (inositol transporters), member 3 /FL=gb:NM\_006933.1"•0.233398586•0.271867791•"solute carrier family 5 (inositol transporters), member 3"•SLC5A3•Hs.534348••6811 // ion transport // inferred from electronic annotation /// 6814 // sodium ion transport // inferred from electronic annotation•5887 // integral to plasma membrane // traceable author statement /// 16020 // membrane // inferred from electronic annotation•5215 // transporter activity // inferred from electronic annotation /// 5367 // myo-inositol:sodium symporter activity // traceable author statement /// 15293 // symporter activity // inferred from electronic annotation  
228006\_at•gb:BG403361 /DB\_XREF=gi:13296809 /DB\_XREF=602419035F1 /CLONE=IMAGE:4526192 /FEA=EST /CNT=24 /TID=Hs.98267.0 /TIER=Stack /STK=9 /UG=Hs.98267 /UG\_TITLE=ESTs•0.232152538•0.285909512•Phosphatase and tensin homolog (mutated in multiple advanced cancers 1)•PTEN•Hs.500466•ENSG00000171862•6470 // protein amino acid dephosphorylation // inferred from electronic annotation /// 7049 // cell cycle // inferred from electronic annotation /// 45786 // negative regulation of cell cycle // inferred from electronic annotation••"4725 // protein tyrosine phosphatase activity // inferred from electronic annotation /// 8138 // protein tyrosine/serine/threonine phosphatase activity // inferred from electronic annotation /// 16314 // phosphatidylinositol-3,4,5-trisphosphate 3-phosphat"  
225875\_s\_at•gb:T84558 /DB\_XREF=gi:712910 /DB\_XREF=yd53d09.r1 /CLONE=IMAGE:111953 /FEA=mRNA /CNT=68 /TID=Hs.13804.1 /TIER=Stack /STK=11 /UG=Hs.13804 /LL=57185 /UG\_GENE=DJ462023.2 /UG\_TITLE=hypothetical protein dJ462023.2•0.228721902•0.197495354•hypothetical protein dJ462023.2•DJ462023.2•Hs.523442•ENSG00000001461••••  
208949\_s\_at•"gb:BC001120.1 /DB\_XREF=gi:12654570 /FEA=FLmRNA /CNT=324 /TID=Hs.621.0 /TIER=FL+Stack /STK=37 /UG=Hs.621 /LL=3958 /UG\_GENE=LGALS3 /DEF=Homo sapiens, lectin, galactoside-binding, soluble, 3 (galectin 3), clone MGC:2058, mRNA, complete cds. /PROD=lectin, gal"•0.228116479•0.20884008•"lectin, galactoside-binding, soluble, 3

(galectin 3) /// galectin-3 internal gene"•LGALS3 ///  
GALIG•Hs.531081•ENSG00000131981••5576 // extracellular region // not recorded  
/// 5634 // nucleus // inferred from electronic annotation /// 5886 // plasma  
membrane // traceable author statement•5529 // sugar binding // traceable  
author statement /// 19863 // IgE binding // inferred from electronic  
annotation  
229865\_at•gb:AW058617 /DB\_XREF=gi:5934256 /DB\_XREF=wy59b06.x1  
/CLONE=IMAGE:2552819 /FEA=EST /CNT=13 /TID=Hs.58217.0 /TIER=Stack /STK=11  
/UG=Hs.58217 /UG\_TITLE=ESTs•0.225935406•0.275568133•fibronectin type III  
domain containing 3B•FNDC3B•Hs.159430•ENSG00000075420•••  
212944\_at•"gb:AK024896.1 /DB\_XREF=gi:10437310 /FEA=mRNA /CNT=106  
/TID=Hs.268016.0 /TIER=Stack /STK=54 /UG=Hs.268016 /UG\_TITLE=Homo sapiens  
cDNA: FLJ21243 fis, clone COL01164 /DEF=Homo sapiens cDNA: FLJ21243 fis,  
clone COL01164."•0.224349691•0.273541852•Mitochondrial ribosomal protein  
S6•MRPS6•Hs.302742•ENSG00000198743•6412 // protein biosynthesis //  
non-traceable author statement•5739 // mitochondrion // inferred from  
electronic annotation /// 15935 // small ribosomal subunit // non-traceable  
author statement•3735 // structural constituent of ribosome // non-traceable  
author statement  
212730\_at•"gb:AK026420.1 /DB\_XREF=gi:10439281 /FEA=mRNA /CNT=111  
/TID=Hs.10587.0 /TIER=Stack /STK=26 /UG=Hs.10587 /LL=23336 /UG\_GENE=KIAA0353  
/UG\_TITLE=KIAA0353 protein /DEF=Homo sapiens cDNA: FLJ22767 fis, clone  
KAIA1191."•0.223472847•0.155521574•desmuslin•DMN•Hs.207106•ENSG00000182253••58  
82 // intermediate filament // non-traceable author statement•5515 // protein  
binding // inferred from physical interaction /// 8307 // structural  
constituent of muscle // non-traceable author statement  
214297\_at•gb:BE857703 /DB\_XREF=gi:10371993 /DB\_XREF=7g46a02.x1  
/CLONE=IMAGE:3309482 /FEA=EST /CNT=11 /TID=Hs.9004.1 /TIER=Stack /STK=10  
/UG=Hs.9004 /LL=1464 /UG\_GENE=CSPG4 /UG\_TITLE=chondroitin sulfate  
proteoglycan 4 (melanoma-associated)•0.222993715•0.14912628•Chondroitin  
sulfate proteoglycan 4  
(melanoma-associated)•CSPG4•Hs.513044•ENSG00000173546•6928 // cell motility  
// not recorded /// 7155 // cell adhesion // inferred from electronic  
annotation•5887 // integral to plasma membrane // traceable author  
statement•5198 // structural molecule activity // inferred from electronic  
annotation  
1555950\_a at•"gb:CA448665 /DB\_XREF=gi:24813085  
/DB\_XREF=UI-H-EI0-ayo-p-15-0-UI.s1 /CLONE=UI-H-EI0-ayo-p-15-0-UI  
/TID=Hs2.1369.3 /CNT=31 /FEA=mRNA /TIER=Stack /STK=9 /LL=1604 /UG\_GENE=DAF  
/UG=Hs.1369 /UG\_TITLE=decay accelerating factor for complement (CD55, Cromer  
blood"•0.22238023•0.20763166•"decay accelerating factor for complement (CD55,  
Cromer blood group system)"•DAF•Hs.527653•ENSG00000196352•"6955 // immune  
response // inferred from electronic annotation /// 6958 // complement  
activation, classical pathway // inferred from electronic annotation"•5625 //  
soluble fraction // traceable author statement /// 5887 // integral to plasma  
membrane // traceable author statement /// 16020 // membrane // inferred from  
electronic annotation•  
203543\_s at•"gb:NM\_001206.1 /DB\_XREF=gi:4557374 /GEN=BTEB1 /FEA=FLmRNA  
/CNT=168 /TID=Hs.150557.0 /TIER=FL /STK=0 /UG=Hs.150557 /LL=687 /DEF=Homo  
sapiens basic transcription element binding protein 1 (BTEB1), mRNA.  
/PROD=basic transcription element binding protein 1  
/F"•0.222260429•0.164241615•Kruppel-like factor  
9•KLF9•Hs.150557•ENSG00000119138•6350 // transcription // inferred from  
electronic annotation /// 6357 // regulation of transcription from RNA  
polymerase II promoter // traceable author statement•5634 // nucleus //  
inferred from electronic annotation•3700 // transcription factor activity //  
traceable author statement /// 8270 // zinc ion binding // inferred from  
electronic annotation  
221563\_at•gb:N36770 /DB\_XREF=gi:1157912 /DB\_XREF=yy34c02.s1  
/CLONE=IMAGE:273122 /FEA=FLmRNA /CNT=68 /TID=Hs.177534.0 /TIER=Stack /STK=12  
/UG=Hs.177534 /LL=11221 /UG\_GENE=DUSP10 /UG\_TITLE=dual specificity  
phosphatase 10 /FL=gb:AB026436.1 gb:NM\_007207.2  
gb:AF179212.1•0.222082631•0.187312882•dual specificity phosphatase  
10•DUSP10•Hs.497822•ENSG00000143507•6470 // protein amino acid  
dephosphorylation // inferred from electronic annotation /// 6470 // protein  
amino acid dephosphorylation // traceable author statement /// 6950 //  
response to stress // traceable author statement /// 7254 // JNK cascade //  
trac•5634 // nucleus // traceable author statement /// 5737 // cytoplasm //  
traceable author statement•16787 // hydrolase activity // inferred from  
electronic annotation /// 17017 // MAP kinase phosphatase activity //  
inferred from electronic annotation  
203304\_at•"gb:NM\_012342.1 /DB\_XREF=gi:6912533 /GEN=NMA /FEA=FLmRNA /CNT=150  
/TID=Hs.78776.0 /TIER=FL+Stack /STK=41 /UG=Hs.78776 /LL=25805 /DEF=Homo  
sapiens putative transmembrane protein (NMA), mRNA. /PROD=putative  
transmembrane protein /FL=gb:NM\_012342.1  
gb:U23070."•0.221866345•0.149735718•BMP and activin membrane-bound  
inhibitor•BAMBI•Hs.533336•ENSG00000095739••16021 // integral to membrane //  
traceable author statement•  
230204\_at•gb:AU144114 /DB\_XREF=gi:11005635 /DB\_XREF=AU144114  
/CLONE=HEMBA1000915 /FEA=EST /CNT=17 /TID=Hs.2799.1 /TIER=Stack /STK=8  
/UG=Hs.2799 /LL=1404 /UG\_GENE=CRTL1 /UG\_TITLE=cartilage linking protein

1•0.220595103•0.166744438•Hyaluronan and proteoglycan link protein  
1•HAPLN1•Hs.2799•ENSG00000145681•7155 // cell adhesion // inferred from  
electronic annotation•5578 // extracellular matrix (sensu Metazoa) //  
traceable author statement•5540 // hyaluronic acid binding // inferred from  
electronic annotation  
213107\_at•gb:R59093 /DB\_XREF=gi:829788 /DB\_XREF=yh03e12.s1 /CLONE=IMAGE:41943  
/FEA=FLmRNA /CNT=70 /TID=Hs.170204.0 /TIER=ConsEnd /STK=4 /UG=Hs.170204  
/LL=23043 /UG\_GENE=KIAA0551 /UG\_TITLE=KIAA0551 protein  
/FL=gb:AF172264.1•0.220275857•0.173028337•TRAF2 and NCK interacting  
kinase•TNIK•Hs.34024•ENSG00000154310•6445 // regulation of translation //  
inferred from direct assay /// 6468 // protein amino acid phosphorylation //  
non-traceable author statement /// 6950 // response to stress // inferred  
from direct assay /// 7243 // protein kinase cascade // inferred fr••4674 //  
protein serine/threonine kinase activity // inferred from direct assay ///  
4674 // protein serine/threonine kinase activity // non-traceable author  
statement /// 5083 // small GTPase regulator activity // inferred from  
electronic annotation /// 55  
230090\_at•gb:AW296078 /DB\_XREF=gi:6702714 /DB\_XREF=UI-H-BW0-aiu-h-11-0-UI.s1  
/CLONE=IMAGE:2730860 /FEA=EST /CNT=14 /TID=Hs.29590.0 /TIER=Stack /STK=9  
/UG=Hs.29590 /UG\_TITLE=ESTs•0.215320298•0.186208596•"Homo sapiens, clone  
IMAGE:4179986, mRNA, partial cds"••Hs.271721••••  
204679\_at•"gb:NM\_002245.1 /DB\_XREF=gi:4504846 /GEN=KCNK1 /FEA=FLmRNA /CNT=59  
/TID=Hs.79351.0 /TIER=FL+Stack /STK=9 /UG=Hs.79351 /LL=3775 /DEF=Homo sapiens  
potassium channel, subfamily K, member 1 (TWIK-1) (KCNK1), mRNA.  
/PROD=potassium channel, subfamily K, member  
1"•0.214530602•0.21539831•"potassium channel, subfamily K, member  
1"•KCNK1•Hs.208544•ENSG00000135750•6811 // ion transport // inferred from  
electronic annotation /// 6813 // potassium ion transport // traceable author  
statement•5624 // membrane fraction // not recorded /// 8076 // voltage-gated  
potassium channel complex // traceable author statement /// 16020 // membrane  
// inferred from electronic annotation /// 16021 // integral to membrane //  
inferred from electronic annotati•5242 // inward rectifier potassium channel  
activity // traceable author statement /// 5244 // voltage-gated ion channel  
activity // inferred from electronic annotation /// 5267 // potassium channel  
activity // inferred from electronic annotation  
205603\_s\_at•"gb:NM\_007309.1 /DB\_XREF=gi:6382070 /GEN=DIAPH2 /FEA=FLmRNA  
/CNT=40 /TID=Hs.226483.1 /TIER=FL+Stack /STK=27 /UG=Hs.226483 /LL=1730  
/DEF=Homo sapiens diaphanous (Drosophila, homolog) 2 (DIAPH2), transcript  
variant 12C, mRNA. /PROD=diaphanous 2 isoform 12C  
/"•0.212036263•0.256900237•diaphanous homolog 2  
(Drosophila)•DIAPH2•Hs.226483•ENSG00000147202•910 // cytokinesis // traceable  
author statement /// 7292 // female gamete generation // traceable author  
statement /// 16043 // cell organization and biogenesis // inferred from  
electronic annotation /// 30036 // actin cytoskeleton organization and  
bioge•16020 // membrane // inferred from electronic annotation•3779 // actin  
binding // inferred from electronic annotation /// 5102 // receptor binding  
// traceable author statement /// 17048 // Rho GTPase binding // inferred  
from electronic annotation  
210233\_at•"gb:AF167343.1 /DB\_XREF=gi:8050486 /GEN=IL1RAP /FEA=FLmRNA /CNT=16  
/TID=Hs.173880.1 /TIER=FL /STK=0 /UG=Hs.173880 /LL=3556 /DEF=Homo sapiens  
soluble interleukin-1 receptor accessory protein (IL1RAP) mRNA, complete cds.  
/PROD=soluble interleukin-1 receptor "•0.211395454•0.238383796•interleukin 1  
receptor accessory protein•IL1RAP•Hs.478673•ENSG00000196083•6461 // protein  
complex assembly // traceable author statement /// 6954 // inflammatory  
response // traceable author statement•5887 // integral to plasma membrane //  
traceable author statement /// 16020 // membrane // inferred from electronic  
annotation•4888 // transmembrane receptor activity // inferred from  
electronic annotation /// 4908 // interleukin-1 receptor activity // inferred  
from electronic annotation  
205968\_at•"gb:NM\_002252.1 /DB\_XREF=gi:4504862 /GEN=KCNS3 /FEA=FLmRNA /CNT=38  
/TID=Hs.47584.0 /TIER=FL+Stack /STK=11 /UG=Hs.47584 /LL=3790 /DEF=Homo  
sapiens potassium voltage-gated channel, delayed-rectifier, subfamily S,  
member 3 (KCNS3), mRNA. /PROD=potassium  
volta"•0.211030769•0.123167263•"potassium voltage-gated channel,  
delayed-rectifier, subfamily S, member  
3"•KCNS3•Hs.414489•ENSG00000170745•6812 // cation transport // inferred from  
electronic annotation /// 6813 // potassium ion transport // traceable author  
statement•5624 // membrane fraction // not recorded /// 8076 // voltage-gated  
potassium channel complex // inferred from electronic annotation /// 16020 //  
membrane // inferred from electronic annotation•5251 // delayed rectifier  
potassium channel activity // traceable author statement /// 5515 // protein  
binding // inferred from electronic annotation /// 15459 // potassium channel  
regulator activity // traceable author statement  
202284\_s\_at•"gb:NM\_000389.1 /DB\_XREF=gi:11386202 /GEN=CDKN1A /FEA=FLmRNA  
/CNT=215 /TID=Hs.179665.0 /TIER=FL+Stack /STK=131 /UG=Hs.179665 /LL=1026  
/DEF=Homo sapiens cyclin-dependent kinase inhibitor 1A (p21, Cip1) (CDKN1A),  
mRNA. /PROD=cyclin-dependent kinase  
inhibitor"•0.208915608•0.37047057•"cyclin-dependent kinase inhibitor 1A (p21,  
Cip1)"•CDKN1A•Hs.370771•ENSG00000124762•79 // regulation of cyclin dependent  
protein kinase activity // traceable author statement /// 7050 // cell cycle  
arrest // inferred from electronic annotation /// 7050 // cell cycle arrest

// traceable author statement /// 8285 // negative regulation of •5634 // nucleus // inferred from electronic annotation /// 5634 // nucleus // traceable author statement•4672 // protein kinase activity // not recorded /// 4861 // cyclin-dependent protein kinase inhibitor activity // inferred from electronic annotation /// 4861 // cyclin-dependent protein kinase inhibitor activity // traceable author statement /// 16301 // 230251\_at•gb:AA041523 /DB\_XREF=gi:1517776 /DB\_XREF=zk44d03.s1 /CLONE=IMAGE:485669 /FEA=EST /CNT=16 /TID=Hs.31917.0 /TIER=Stack /STK=8 /UG=Hs.31917 /UG\_TITLE=ESTs•0.206369719•0.052321588•Chromosome 6 open reading frame 176•C6orf176•Hs.31917••••

227410\_at•gb:AW264102 /DB\_XREF=gi:6640918 /DB\_XREF=xq83g09.x1 /CLONE=IMAGE:2757280 /FEA=EST /CNT=31 /TID=Hs.39168.0 /TIER=Stack /STK=11 /UG=Hs.39168 /UG\_TITLE=ESTs•0.204776315•0.283266368•"family with sequence similarity 43, member A"•FAM43A•Hs.435080••••

223618\_at•"gb:AF225426.1 /DB\_XREF=gi:9963854 /FEA=FLmRNA /CNT=28 /TID=Hs.24889.0 /TIER=FL+Stack /STK=17 /UG=Hs.24889 /LL=56776 /UG\_GENE=FMN2 /DEF=Homo sapiens HT016 mRNA, complete cds. /PROD=HT016 /FL=gb:AF225426.1"•0.204002973•0.271179281•formin 2•FMN2•Hs.24889••7242 // intracellular signaling cascade // inferred from electronic annotation /// 7275 // development // inferred from electronic annotation /// 7275 // development // non-traceable author statement /// 16043 // cell organization and biogenesis // inferr•5634 // nucleus // inferred from electronic annotation•3779 // actin binding // inferred from electronic annotation 203562\_at•"gb:NM\_005103.2 /DB\_XREF=gi:12025681 /GEN=FEZ1 /FEA=FLmRNA /CNT=101 /TID=Hs.79226.1 /TIER=FL+Stack /STK=49 /UG=Hs.79226 /LL=9638 /DEF=Homo sapiens fasciculation and elongation protein zeta 1 (zygin I) (FEZ1), transcript variant 1, mRNA. /PROD=zygin 1, isof"•0.203986334•0.221956099•fasciculation and elongation protein zeta 1 (zygin I)•FEZ1•Hs.224008•ENSG00000149557•7155 // cell adhesion // traceable author statement /// 7399 // neurogenesis // traceable author statement /// 7411 // axon guidance // traceable author statement••

212573\_at•gb:AF131747.1 /DB\_XREF=gi:4406562 /FEA=mRNA /CNT=133 /TID=Hs.167115.0 /TIER=Stack /STK=59 /UG=Hs.167115/LL=23052 /UG\_GENE=KIAA0830 /UG\_TITLE=KIAA0830 protein /DEF=Homo sapiens clone 24951 mRNA sequence. •0.202250552•0.088891883•KIAA0830 protein•KIAA0830•Hs.167115•ENSG00000149218•••3676 // nucleic acid binding // inferred from electronic annotation /// 4519 // endonuclease activity // inferred from electronic annotation /// 16787 // hydrolase activity // inferred from electronic annotation

242093\_at•gb:AW263497 /DB\_XREF=gi:6640313 /DB\_XREF=xn80a06.x1 /CLONE=IMAGE:2700754 /FEA=EST /CNT=6 /TID=Hs.97774.0 /TIER=ConsEnd /STK=3 /UG=Hs.97774 /UG\_TITLE=ESTs•0.20152607•0.221353997••••••••

207336\_at•"gb:NM\_006940.1 /DB\_XREF=gi:5902113 /GEN=SOX5 /FEA=FLmRNA /CNT=6 /TID=Hs.87224.0 /TIER=FL /STK=3 /UG=Hs.87224 /LL=6660 /DEF=Homo sapiens SRY (sex determining region Y)-box 5 (SOX5), mRNA. /PROD=SRY (sex determining region Y)-box 5 /FL=gb:NM\_006940.1"•0.201156907•0.079515232•SRY (sex determining region Y)-box 5•SOX5•Hs.505007•ENSG00000134532•"6350 // transcription // inferred from electronic annotation /// 6355 // regulation of transcription, DNA-dependent // inferred from electronic annotation /// 6366 // transcription from RNA polymerase II promoter // traceable author statement"•5634 // nucleus // inferred from electronic annotation•3700 // transcription factor activity // traceable author statement 39248\_at•"Cluster Incl. N74607:za55a01.s1 Homo sapiens cDNA, 3 end /clone=IMAGE-296424 /clone\_end=3 /gb=N74607 /gi=1231892 /ug=Hs.234642 /len=487"•0.200713145•0.141677221•aquaporin 3•AQP3•Hs.234642•ENSG00000165272•6810 // transport // non-traceable author statement /// 7588 // excretion // traceable author statement•5624 // membrane fraction // not recorded /// 5887 // integral to plasma membrane // not recorded /// 16020 // membrane // inferred from electronic annotation•5215 // transporter activity // non-traceable author statement 229649\_at•gb:AI129949 /DB\_XREF=gi:3598463 /DB\_XREF=qc45g07.x1 /CLONE=IMAGE:1712604 /FEA=EST /CNT=27 /TID=Hs.22269.1 /TIER=Stack /STK=9 /UG=Hs.22269 /LL=9369 /UG\_GENE=NRXN3 /UG\_TITLE=neurexin 3•0.200644278•0.236405695•neurexin 3•NRXN3•Hs.368307•ENSG00000021645•7155 // cell adhesion // inferred from electronic annotation /// 7411 // axon guidance // traceable author statement•5887 // integral to plasma membrane // traceable author statement /// 16021 // integral to membrane // inferred from electronic annotation•4872 // receptor activity // traceable author statement /// 5198 // structural molecule activity // inferred from electronic annotation /// 5515 // protein binding // inferred from electronic annotation

200907\_s\_at•gb:AU157932 /DB\_XREF=gi:11019453 /DB\_XREF=AU157932 /CLONE=PLACE1010217 /FEA=FLmRNA /CNT=425 /TID=Hs.194431.0 /TIER=Stack /STK=12 /UG=Hs.194431 /LL=23022 /UG\_GENE=KIAA0992 /UG\_TITLE=palladin /FL=gb:AF151909.1 gb:AF077041.1 gb:NM\_016081.1•0.200102893•0.174446508•palladin•KIAA0992•Hs.151220•ENSG00000129116•6468 // protein amino acid phosphorylation // inferred from electronic annotation•5021 // vascular endothelial growth factor receptor activity // inferred from electronic annotation /// 5524 // ATP binding // inferred from electronic annotation 201694\_s\_at•"gb:NM\_001964.1 /DB\_XREF=gi:4503492 /GEN=EGR1 /FEA=FLmRNA



inferred from electronic annotation /// 6355 // regulation of transcription, DNA-dependent // non-traceable author statement"•5634 // nucleus // non-traceable author statement•3700 // transcription factor activity // non-traceable author statement  
204736\_s\_at•"gb:NM\_001897.1 /DB\_XREF=gi:4503098 /GEN=CSPG4 /FEA=FLmRNA /CNT=51 /TID=Hs.9004.0 /TIER=FL /STK=1 /UG=Hs.9004 /LL=1464 /DEF=Homo sapiens chondroitin sulfate proteoglycan 4 (melanoma-associated) (CSPG4), mRNA. /PROD=melanoma-associated chondroitin sulfatepr"•0.19312958•0.244159942•chondroitin sulfate proteoglycan 4 (melanoma-associated)•CSPG4•Hs.513044•ENSG00000173546•6928 // cell motility // not recorded /// 7155 // cell adhesion // inferred from electronic annotation•5887 // integral to plasma membrane // traceable author statement•5198 // structural molecule activity // inferred from electronic annotation  
227140\_at•"gb:AI343467 /DB\_XREF=gi:4080673 /DB\_XREF=tb97a02.x1 /CLONE=IMAGE:2062250 /FEA=mRNA /CNT=47 /TID=Hs.28792.0 /TIER=Stack /STK=17 /UG=Hs.28792 /UG\_TITLE=Homo sapiens cDNA FLJ11041 fis, clone PLACE1004405"•0.192529138•0.283206274•"Inhibin, beta A (activin A, activin AB alpha polypeptide)"•INHBA•Hs.28792•ENSG00000122641•1501 // skeletal development // traceable author statement /// 1541 // ovarian follicle development // non-traceable author statement /// 6917 // induction of apoptosis // inferred from direct assay /// 6952 // defense response // traceable author stateme•5576 // extracellular region // traceable author statement•5125 // cytokine activity // traceable author statement /// 5160 // transforming growth factor beta receptor binding // not recorded /// 5179 // hormone activity // traceable author statement /// 5515 // protein binding // inferred from physical interacti  
203476\_at•"gb:NM\_006670.1 /DB\_XREF=gi:5729717 /GEN=5T4 /FEA=FLmRNA /CNT=119 /TID=Hs.82128.0 /TIER=FL /STK=5 /UG=Hs.82128 /LL=10860 /DEF=Homo sapiens 5T4 oncofetal trophoblast glycoprotein (5T4), mRNA. /PROD=5T4 oncofetal trophoblast glycoprotein /FL=gb:NM\_006670.1"•0.192481902•0.384555701•trophoblast glycoprotein•TPBG•Hs.82128•ENSG00000146242•6928 // cell motility // not recorded /// 7155 // cell adhesion // non-traceable author statement•5578 // extracellular matrix (sensu Metazoa) // inferred from electronic annotation /// 5887 // integral to plasma membrane // traceable author statement•219806\_s\_at•"gb:NM\_020179.1 /DB\_XREF=gi:9910225 /GEN=FN5 /FEA=FLmRNA /CNT=16 /TID=Hs.259737.0 /TIER=FL /STK=0 /UG=Hs.259737 /LL=56935 /DEF=Homo sapiens FN5 protein (FN5), mRNA. /PROD=FN5 protein /FL=gb:NM\_020179.1 gb:AF197137.1"•0.192178648•0.254224076•FN5 protein•FN5•Hs.438064•ENSG00000166002•••  
241355\_at•gb:BF528433 /DB\_XREF=gi:11615796 /DB\_XREF=602043786F1 /CLONE=IMAGE:4181517 /FEA=EST /CNT=7 /TID=Hs.165565.0 /TIER=ConsEnd /STK=0 /UG=Hs.165565 /UG\_TITLE=ESTs•0.191982014•0.126237877•hairless homolog (mouse)•HR•Hs.272367•ENSG00000168453"•6350 // transcription // inferred from electronic annotation /// 6355 // regulation of transcription, DNA-dependent // non-traceable author statement"•5634 // nucleus // non-traceable author statement•3700 // transcription factor activity // non-traceable author statement  
212135\_s\_at•"gb:AW517686 /DB\_XREF=gi:7155768 /DB\_XREF=xs86d05.x1 /CLONE=IMAGE:2776521 /FEA=EST /CNT=223 /TID=Hs.305923.2 /TIER=Stack /STK=12 /UG=Hs.305923 /LL=493 /UG\_GENE=ATP2B4 /UG\_TITLE=ATPase, Ca++ transporting, plasma membrane 4"•0.19057487•0.146824421•"ATPase, Ca++ transporting, plasma membrane 4"•ATP2B4•Hs.343522•ENSG00000058668•6812 // cation transport // inferred from electronic annotation /// 6816 // calcium ion transport // inferred from electronic annotation /// 8152 // metabolism // inferred from electronic annotation•5886 // plasma membrane // traceable author statement /// 5887 // integral to plasma membrane // traceable author statement•287 // magnesium ion binding // inferred from electronic annotation /// 5388 // calcium-transporting ATPase activity // traceable author statement /// 5509 // calcium ion binding // inferred from electronic annotation /// 5516 // calmodulin binding // inf  
209277\_at•gb:AL574096 /DB\_XREF=gi:12933969 /DB\_XREF=AL574096 /CLONE=CS0DI040YI17 (3 prime) /FEA=FLmRNA /CNT=478 /TID=Hs.295944.0 /TIER=Stack /STK=16 /UG=Hs.295944 /LL=7980 /UG\_GENE=TFPI2 /UG\_TITLE=tissue factor pathway inhibitor 2 /FL=gb:D29992.1 gb:L27624.1 gb:NM\_0.189184296•0.141693333•Tissue factor pathway inhibitor 2•TFPI2•Hs.438231•ENSG00000105825•7596 // blood coagulation // inferred from electronic annotation•5578 // extracellular matrix (sensu Metazoa) // traceable author statement•4867 // serine-type endopeptidase inhibitor activity // not recorded /// 5201 // extracellular matrix structural constituent // traceable author statement  
215719\_x\_at•"gb:X83493.1 /DB\_XREF=gi:971457 /FEA=mRNA /CNT=4 /TID=Hs.82359.2 /TIER=ConsEnd /STK=0 /UG=Hs.82359 /LL=355 /UG\_GENE=TNFRSF6 /UG\_TITLE=tumor necrosis factor receptor superfamily, member 6 /DEF=H.sapiens mRNA for FasApo-1 (clone pCRTM11-FasdeltaTM)."•0.186964957•0.189284893"•Fas (TNF receptor superfamily, member 6)"•FAS•Hs.244139•ENSG00000026103•6461 // receptor complex assembly // traceable author statement /// 6915 // apoptosis // inferred from electronic annotation /// 6916 // anti-apoptosis // traceable author statement /// 6917 // induction of apoptosis // traceable author statement /// 6955 •5625 // soluble fraction // traceable author

statement /// 5829 // cytosol // non-traceable author statement /// 16020 // membrane // inferred from electronic annotation /// 16021 // integral to membrane // inferred from electronic annotation\*4888 // transmembrane receptor activity // inferred from electronic annotation /// 5515 // protein binding // inferred from electronic annotation  
1560448\_at\*"gb:BC041422.1 /DB\_XREF=gi:27371084 /TID=Hs2.434427.1 /CNT=3 /FEA=mRNA /TIER=ConsEnd /STK=0 /UG=Hs.434427 /UG\_TITLE=Homo sapiens, clone IMAGE:3878345, mRNA /DEF=Homo sapiens, clone IMAGE:3878345, mRNA."\*0.185715214\*0.193108595\*hypothetical protein LOC340037\*LOC340037\*.....  
241456\_at\*"gb:AI147384 /DB\_XREF=gi:3675066 /DB\_XREF=qg64d06.s1 /CLONE=IMAGE:1839947 /FEA=EST /CNT=5 /TID=Hs.133029.0 /TIER=ConsEnd /STK=4 /UG=Hs.133029 /UG\_TITLE=ESTs\*0.182855241\*0.200712044\*"CDNA FLJ30785 fis, clone FEBRA2000901"\*..Hs.133029\*.....  
209278\_s\_at\*"gb:L27624.1 /DB\_XREF=gi:441149 /FEA=FLmRNA /CNT=478 /TID=Hs.295944.0 /TIER=FL+Stack /STK=17 /UG=Hs.295944 /LL=7980 /UG\_GENE=TFPI2 /DEF=Homo sapiens tissue factor pathway inhibitor-2 mRNA, complete cds. /PROD=tissue factor pathway inhibitor-2 /FL=gb:D29992"\*0.181924103\*0.177328684\*tissue factor pathway inhibitor 2\*TFPI2\*Hs.438231\*ENSG00000105825\*7596 // blood coagulation // inferred from electronic annotation\*5578 // extracellular matrix (sensu Metazoa) // traceable author statement\*4867 // serine-type endopeptidase inhibitor activity // not recorded /// 5201 // extracellular matrix structural constituent // traceable author statement  
225436\_at\*"gb:AI339710 /DB\_XREF=gi:4076637 /DB\_XREF=qk68d02.x1 /CLONE=IMAGE:1874115 /FEA=mRNA /CNT=111 /TID=Hs.26765.0 /TIER=Stack /STK=8 /UG=Hs.26765 /LL=58489 /UG\_GENE=LOC58489 /UG\_TITLE=hypothetical protein from EUROIMAGE 588495\*0.179320865\*0.191219193\*hypothetical protein from EUROIMAGE 588495\*LOC58489\*Hs.459072\*ENSG00000136379\*..3824 // catalytic activity // inferred from electronic annotation  
218980\_at\*"gb:NM\_025135.1 /DB\_XREF=gi:13399325 /GEN=KIAA1695 /FEA=FLmRNA /CNT=64 /TID=Hs.288841.0 /TIER=FL+Stack /STK=31 /UG=Hs.288841 /LL=80206 /DEF=Homo sapiens hypothetical protein FLJ22297 (KIAA1695), mRNA. /PROD=hypothetical protein KIAA1695 /FL=gb:NM\_025135.1"\*0.178325954\*0.176536193\*formin homology 2 domain containing 3\*FHOD3\*Hs.436636\*..16043 // cell organization and biogenesis // inferred from electronic annotation\*3779 // actin binding // inferred from electronic annotation  
226497\_s\_at\*"gb:AA149648 /DB\_XREF=gi:1720449 /DB\_XREF=z139e08.s1 /CLONE=IMAGE:504326 /FEA=mRNA /CNT=78 /TID=Hs.22968.0 /TIER=Stack /STK=25 /UG=Hs.22968 /UG\_TITLE=Homo sapiens clone IMAGE:451939, mRNA sequence"\*0.177557363\*0.168380946\*Fms-related tyrosine kinase 1 (vascular endothelial growth factor/vascular permeability factor receptor)\*FLT1\*Hs.507621\*ENSG00000102755\*1525 // angiogenesis // inferred from electronic annotation /// 6468 // protein amino acid phosphorylation // inferred from electronic annotation /// 7169 // transmembrane receptor protein tyrosine kinase signaling pathway // traceable author statement ///\*5615 // extracellular space // traceable author statement /// 5887 // integral to plasma membrane // traceable author statement /// 16020 // membrane // inferred from electronic annotation\*4872 // receptor activity // traceable author statement /// 5021 // vascular endothelial growth factor receptor activity // traceable author statement /// 5524 // ATP binding // inferred from electronic annotation /// 16740 // transferase activity // infe  
210511\_s\_at\*"gb:M13436.1 /DB\_XREF=gi:186414 /GEN=INHBA /FEA=FLmRNA /CNT=5 /TID=Hs.727.1 /TIER=FL /STK=0 /UG=Hs.727 /LL=3624 /UG\_TITLE=inhibin, beta A (activin A, activin AB alpha polypeptide) /DEF=Human ovarian beta-A inhibin mRNA, complete cds. /FL=gb:M13436.1"\*0.176481031\*0.242267706\*"inhibin, beta A (activin A, activin AB alpha polypeptide)"\*INHBA\*Hs.28792\*ENSG00000122641\*1501 // skeletal development // traceable author statement /// 1541 // ovarian follicle development // non-traceable author statement /// 6917 // induction of apoptosis // inferred from direct assay /// 6952 // defense response // traceable author stateme\*5576 // extracellular region // traceable author statement\*5125 // cytokine activity // traceable author statement /// 5160 // transforming growth factor beta receptor binding // not recorded /// 5179 // hormone activity // traceable author statement /// 5515 // protein binding // inferred from physical interacti  
202202\_s\_at\*"gb:NM\_002290.2 /DB\_XREF=gi:9845494 /GEN=LAMA4 /FEA=FLmRNA /CNT=195 /TID=Hs.78672.0 /TIER=FL /STK=3 /UG=Hs.78672 /LL=3910 /DEF=Homo sapiens laminin, alpha 4 (LAMA4), mRNA. /PROD=laminin, alpha 4 precursor /FL=gb:NM\_002290.2"\*0.176115214\*0.197296847\*"laminin, alpha 4"\*LAMA4\*Hs.213861\*ENSG00000112769\*30155 // regulation of cell adhesion // inferred from electronic annotation /// 30334 // regulation of cell migration // inferred from electronic annotation /// 45995 // regulation of embryonic development // inferred from electronic annotation\*5605 // basal lamina // traceable author statement /// 5606 // laminin-1 // inferred from electronic annotation\*5102 // receptor binding // inferred from electronic annotation /// 5201 // extracellular matrix structural constituent // traceable author statement /// 5515 // protein binding // inferred from electronic annotation  
209351\_at\*"gb:BC002690.1 /DB\_XREF=gi:12803708 /FEA=FLmRNA /CNT=212 /TID=Hs.117729.0 /TIER=FL+Stack /STK=53 /UG=Hs.117729 /LL=3861 /UG\_GENE=KRT14



/DEF=Homo sapiens, keratin 14 (epidermolysis bullosa simplex, Dowling-Meara, Koebner), clone MGC:3944, mRNA, complete  
cds"•0.174257423•0.159066152•"keratin 14 (epidermolysis bullosa simplex, Dowling-Meara, Koebner)"•KRT14•Hs.355214•ENSG00000186847•8544 // epidermis development // traceable author statement•5882 // intermediate filament // not recorded•5200 // structural constituent of cytoskeleton // traceable author statement  
222496\_s\_at•gb:AW241742 /DB\_XREF=gi:6575496 /DB\_XREF=xn74e04.x1  
/CLONE=IMAGE:2700222 /FEA=FLmRNA /CNT=177 /TID=Hs.95549.0 /TIER=Stack /STK=13 /UG=Hs.95549 /LL=54502 /UG\_GENE=FLJ20273 /UG\_TITLE=hypothetical protein /FL=gb:NM\_019027.1•0.172735708•0.402146781•RNA-binding protein•FLJ20273•Hs.518727•ENSG00000163694•••166 // nucleotide binding // inferred from electronic annotation /// 3676 // nucleic acid binding // inferred from electronic annotation  
1569470\_a\_at•"gb:BC020191.1 /DB\_XREF=gi:22507482 /TID=Hs2.161134.3 /CNT=5 /FEA=mRNA /TIER=ConsEnd /STK=0 /LL=84978 /UG\_GENE=MGC14161 /UG=Hs.161134 /UG\_TITLE=hypothetical protein MGC14161 /DEF=Homo sapiens, Similar to hypothetical protein MGC14161, clone IMAGE:4844595, "•0.172114079•0.17525004•hypothetical protein MGC14161•MGC14161•Hs.368399•ENSG00000171877••5737 // cytoplasm // inferred from electronic annotation /// 5856 // cytoskeleton // inferred from electronic annotation /// 16020 // membrane // inferred from electronic annotation•5488 // binding // inferred from electronic annotation /// 8092 // cytoskeletal protein binding // inferred from electronic annotation  
202295\_s\_at•"gb:NM\_004390.1 /DB\_XREF=gi:4758095 /GEN=CTSH /FEA=FLmRNA /CNT=216 /TID=Hs.288181.0 /TIER=FL+Stack /STK=108 /UG=Hs.288181 /LL=1512 /DEF=Homo sapiens cathepsin H (CTSH), mRNA. /PROD=cathepsin H /FL=gb:BC002479.1 gb:NM\_004390.1"•0.170765162•0.296606172•cathepsin H•CTSH•Hs.148641•ENSG00000103811•6508 // proteolysis and peptidolysis // inferred from electronic annotation /// 6508 // proteolysis and peptidolysis // traceable author statement•5764 // lysosome // not recorded•4197 // cysteine-type endopeptidase activity // inferred from electronic annotation /// 4215 // cathepsin H activity // traceable author statement  
221766\_s\_at•gb:AW246673 /DB\_XREF=gi:6589666 /DB\_XREF=2821951.3prime /CLONE=IMAGE:2821951 /FEA=DNA /CNT=155 /TID=Hs.10784.3 /TIER=Stack /STK=12 /UG=Hs.10784 /LL=55603 /UG\_GENE=FLJ20037 /UG\_TITLE=hypothetical protein FLJ20037•0.169340918•0.076494733•"family with sequence similarity 46, member A"•FAM46A•Hs.10784•ENSG00000112773•••  
203917\_at•"gb:NM\_001338.1 /DB\_XREF=gi:4503172 /GEN=CXADR /FEA=FLmRNA /CNT=84 /TID=Hs.79187.0 /TIER=FL+Stack /STK=40 /UG=Hs.79187 /LL=1525 /DEF=Homo sapiens coxsackie virus and adenovirus receptor (CXADR), mRNA. /PROD=coxsackie virus and adenovirus receptor /FL=gb:U9"•0.167831428•0.191532504•coxsackie virus and adenovirus receptor•CXADR•Hs.473417•ENSG00000154639••5886 // plasma membrane // non-traceable author statement /// 5887 // integral to plasma membrane // traceable author statement•4872 // receptor activity // inferred from electronic annotation /// 4872 // receptor activity // traceable author statement  
210086\_at•"gb:AF039196.2 /DB\_XREF=gi:5042382 /GEN=hairless /FEA=FLmRNA /CNT=27 /TID=Hs.284126.0 /TIER=FL+Stack /STK=13 /UG=Hs.284126 /LL=3264 /DEF=Homo sapiens putative single zinc finger transcription factor protein (hairless) mRNA, complete cds. /PROD=putative sin"•0.167110596•0.272093836•hairless homolog (mouse)•HR•Hs.272367•ENSG00000168453•"6350 // transcription // inferred from electronic annotation /// 6355 // regulation of transcription, DNA-dependent // non-traceable author statement"•5634 // nucleus // non-traceable author statement•3700 // transcription factor activity // non-traceable author statement  
205227\_at•"gb:NM\_002182.1 /DB\_XREF=gi:4504660 /GEN=IL1RAP /FEA=FLmRNA /CNT=48 /TID=Hs.173880.0 /TIER=FL+Stack /STK=8 /UG=Hs.173880 /LL=3556 /DEF=Homo sapiens interleukin 1 receptor accessory protein (IL1RAP), mRNA. /PROD=interleukin 1 receptor accessory protein /FL="•0.166793019•0.143264878•interleukin 1 receptor accessory protein•IL1RAP•Hs.478673•ENSG00000196083•6461 // protein complex assembly // traceable author statement /// 6954 // inflammatory response // traceable author statement•5887 // integral to plasma membrane // traceable author statement /// 16020 // membrane // inferred from electronic annotation•4888 // transmembrane receptor activity // inferred from electronic annotation /// 4908 // interleukin-1 receptor activity // inferred from electronic annotation  
242447\_at•gb:AI656180 /DB\_XREF=gi:4740159 /DB\_XREF=tt38e08.x1 /CLONE=IMAGE:2243078 /FEA=EST /CNT=5 /TID=Hs.196284.0 /TIER=ConsEnd /STK=0 /UG=Hs.196284 /UG\_TITLE=ESTs•0.165824249•0.090425015•Transcribed locus••Hs.551039••••  
231656\_x\_at•gb:AW593467 /DB\_XREF=gi:7280725 /DB\_XREF=hg16f07.x1 /CLONE=IMAGE:2945797 /FEA=EST /CNT=8 /TID=Hs.321622.1 /TIER=Stack /STK=8 /UG=Hs.321622 /LL=54907 /UG\_GENE=FLJ20363 /UG\_TITLE=hypothetical protein FLJ20363•0.164525098•0.384486555••••••••  
203542\_s\_at•gb:AI690205 /DB\_XREF=gi:4901499 /DB\_XREF=tx33d02.x1 /CLONE=IMAGE:2271363 /FEA=FLmRNA /CNT=168 /TID=Hs.150557.0 /TIER=Stack /STK=33 /UG=Hs.150557 /LL=687 /UG\_GENE=BTEB1 /UG\_TITLE=basic transcription

element binding protein 1 /FL=gb:D31716.1  
gb:NM\_001206.1\*0.16397893\*0.098308083\*Kruppel-like factor  
9\*KLF9\*Hs.150557\*ENSG00000119138\*6350 // transcription // inferred from  
electronic annotation /// 6357 // regulation of transcription from RNA  
polymerase II promoter // traceable author statement\*5634 // nucleus //  
inferred from electronic annotation\*3700 // transcription factor activity //  
traceable author statement /// 8270 // zinc ion binding // inferred from  
electronic annotation  
205893\_at\*"gb:NM\_014932.1 /DB\_XREF=gi:7662469 /GEN=NLGN1 /FEA=FLmRNA /CNT=23  
/TID=Hs.71132.0 /TIER=FL /STK=0 /UG=Hs.71132 /LL=22871 /DEF=Homo sapiens  
neuroigin 1 (NLGN1), mRNA. /PROD=neuroigin 1 /FL=gb:AB028993.1  
gb:NM\_014932.1"\*0.163365335\*0.134433846\*neuroigin  
1\*NLGN1\*Hs.549114\*ENSG00000169760\*6605 // protein targeting // inferred from  
sequence or structural similarity /// 7155 // cell adhesion // inferred from  
electronic annotation /// 7416 // synaptogenesis // inferred from sequence or  
structural similarity /// 16080 // synaptic vesicle target\*5887 // integral to  
plasma membrane // inferred from sequence or structural similarity /// 16020  
// membrane // inferred from electronic annotation /// 45202 // synapse //  
inferred from sequence or structural similarity\*3824 // catalytic activity //  
inferred from electronic annotation /// 16789 // carboxylic ester hydrolase  
activity // inferred from sequence or structural similarity /// 42043 //  
neurexin binding // inferred from sequence or structural similarity  
210089\_s\_at\*"gb:BC004241.1 /DB\_XREF=gi:13278992 /FEA=FLmRNA /CNT=34  
/TID=Hs.327703.0 /TIER=FL+Stack /STK=27 /UG=Hs.327703 /DEF=Homo sapiens,  
Similar to laminin, alpha 4, clone MGC:10389, mRNA, complete cds.  
/PROD=Similar to laminin, alpha 4  
/FL=gb:BC004241.1"\*0.161854899\*0.331978575\*"laminin, alpha  
4"\*LAMA4\*Hs.213861\*ENSG00000112769\*30155 // regulation of cell adhesion //  
inferred from electronic annotation /// 30334 // regulation of cell migration  
// inferred from electronic annotation /// 45995 // regulation of embryonic  
development // inferred from electronic annotation\*5605 // basal lamina //  
traceable author statement /// 5606 // laminin-1 // inferred from electronic  
annotation\*5102 // receptor binding // inferred from electronic annotation  
/// 5201 // extracellular matrix structural constituent // traceable author  
statement /// 5515 // protein binding // inferred from electronic annotation  
210118\_s\_at\*"gb:M15329.1 /DB\_XREF=gi:186277 /GEN=IL1A /FEA=FLmRNA /CNT=29  
/TID=Hs.1722.1 /TIER=FL /STK=0 /UG=Hs.1722 /LL=3552 /DEF=Human interleukin  
1-alpha (IL1A) mRNA, complete cds. /PROD=interleukin 1-alpha  
/FL=gb:M15329.1"\*0.157934634\*0.105944702\*"interleukin 1,  
alpha"\*IL1A\*Hs.1722\*ENSG00000115008\*74 // regulation of cell cycle //  
inferred from electronic annotation /// 6915 // apoptosis // traceable author  
statement /// 6916 // anti-apoptosis // traceable author statement /// 6935  
// chemotaxis // not recorded /// 6954 // inflammatory response // \*5615 //  
extracellular space // traceable author statement /// 5737 // cytoplasm //  
not recorded\*4871 // signal transducer activity // traceable author statement  
/// 5149 // interleukin-1 receptor binding // inferred from electronic  
annotation /// 5515 // protein binding // inferred from physical interaction  
205130\_at\*"gb:NM\_014226.1 /DB\_XREF=gi:7657497 /GEN=RAGE /FEA=FLmRNA /CNT=52  
/TID=Hs.104119.0 /TIER=FL+Stack /STK=38 /UG=Hs.104119 /LL=5891 /DEF=Homo  
sapiens renal tumor antigen (RAGE), mRNA. /PROD=renal tumor antigen  
/FL=gb:NM\_014226.1 gb:AB022694.1"\*0.157224305\*0.14094359\*renal tumor  
antigen\*RAGE\*Hs.104119\*ENSG00000080823\*6468 // protein amino acid  
phosphorylation // traceable author statement /// 7165 // signal transduction  
// traceable author statement\*5737 // cytoplasm // traceable author  
statement\*4674 // protein serine/threonine kinase activity // traceable  
author statement /// 5524 // ATP binding // inferred from electronic  
annotation /// 16740 // transferase activity // inferred from electronic  
annotation  
226829\_at\*gb:AW138743 /DB\_XREF=gi:6143061 /DB\_XREF=UI-H-BI1-add-g-07-0-UI.s1  
/CLONE=IMAGE:2716597 /FEA=EST /CNT=41 /TID=Hs.23972.0 /TIER=Stack /STK=12  
/UG=Hs.23972  
/UG\_TITLE=ESTs\*0.156814729\*0.203148975\*KIAA1914\*KIAA1914\*Hs.501106\*ENSG0000016  
9129\*\*\*  
212136\_at\*"gb:AW517686 /DB\_XREF=gi:7155768 /DB\_XREF=xs86d05.x1  
/CLONE=IMAGE:2776521 /FEA=EST /CNT=223 /TID=Hs.305923.2 /TIER=Stack /STK=12  
/UG=Hs.305923 /LL=493 /UG\_GENE=ATP2B4 /UG\_TITLE=ATPase, Ca++ transporting,  
plasma membrane 4"\*0.156768888\*0.192823064\*"ATPase, Ca++ transporting, plasma  
membrane 4"\*ATP2B4\*Hs.343522\*ENSG00000058668\*6812 // cation transport //  
inferred from electronic annotation /// 6816 // calcium ion transport //  
inferred from electronic annotation /// 8152 // metabolism // inferred from  
electronic annotation\*5886 // plasma membrane // traceable author statement  
/// 5887 // integral to plasma membrane // traceable author statement\*287 //  
magnesium ion binding // inferred from electronic annotation /// 5388 //  
calcium-transporting ATPase activity // traceable author statement /// 5509  
// calcium ion binding // inferred from electronic annotation /// 5516 //  
calmodulin binding // inf  
205016\_at\*"gb:NM\_003236.1 /DB\_XREF=gi:4507460 /GEN=TGFA /FEA=FLmRNA /CNT=49  
/TID=Hs.170009.0 /TIER=FL /STK=0 /UG=Hs.170009 /LL=7039 /DEF=Homo sapiens  
transforming growth factor, alpha (TGFA), mRNA. /PROD=transforming growth  
factor, alpha /FL=gb:NM\_003236.1  
gb:K03222"\*0.155673887\*0.129539894\*"transforming growth factor,

alpha"•TGFA•Hs.170009•ENSG00000163235•74 // regulation of cell cycle // inferred from electronic annotation /// 7267 // cell-cell signaling // not recorded /// 8283 // cell proliferation // traceable author statement•5615 // extracellular space // not recorded /// 5625 // soluble fraction // not recorded /// 5886 // plasma membrane // non-traceable author statement /// 5887 // integral to plasma membrane // not recorded•4713 // protein-tyrosine kinase activity // traceable author statement /// 4871 // signal transducer activity // traceable author statement /// 5155 // epidermal growth factor receptor activating ligand activity // not recorded /// 5515 // protein binding

209424\_s\_at•gb:AI796120 /DB\_XREF=gi:5361583 /DB\_XREF=wh42f03.x1 /CLONE=IMAGE:2383421 /FEA=FLmRNA /CNT=163 /TID=Hs.128749.0 /TIER=Stack /STK=9 /UG=Hs.128749 /LL=23600 /UG\_GENE=AMACR /UG\_TITLE=alpha-methylacyl-CoA racemase /FL=gb:NM\_014324.1 gb:AF047020.1 gb:AF158378.1•0.152725718•0.123105673•alpha-methylacyl-CoA racemase•AMACR•Hs.508343•ENSG00000082196•8152 // metabolism // inferred from electronic annotation•5739 // mitochondrion // traceable author statement /// 5777 // peroxisome // traceable author statement•3824 // catalytic activity // inferred from electronic annotation /// 8111 // alpha-methylacyl-CoA racemase activity // inferred from electronic annotation /// 16853 // isomerase activity // inferred from electronic annotation

206027\_at•"gb:NM\_002960.1 /DB\_XREF=gi:4506762 /GEN=S100A3 /FEA=FLmRNA /CNT=26 /TID=Hs.2961.0 /TIER=FL+Stack /STK=11 /UG=Hs.2961 /LL=6274 /DEF=Homo sapiens S100 calcium-binding protein A3 (S100A3), mRNA. /PROD=S100 calcium-binding protein A3 /FL=gb:NM\_002960.1"•0.152032253•0.123073833•S100 calcium binding protein A3•S100A3•Hs.433168•ENSG00000188015•••5509 // calcium ion binding // not recorded

203143\_s\_at•gb:T79953 /DB\_XREF=gi:698462 /DB\_XREF=yd85c11.s1 /CLONE=IMAGE:115028 /FEA=FLmRNA /CNT=111 /TID=Hs.158282.0 /TIER=Stack /STK=32 /UG=Hs.158282 /LL=9674 /UG\_GENE=KIAA0040 /UG\_TITLE=KIAA0040 gene product /FL=gb:D25539.1 gb:NM\_014656.1•0.151362667•0.130342222•KIAA0040•KIAA0040•Hs.518138•ENSG00000162666•••

226424\_at•gb:AI683754 /DB\_XREF=gi:4893936 /DB\_XREF=tw53f02.x1 /CLONE=IMAGE:2263419 /FEA=EST /CNT=66 /TID=Hs.26685.0 /TIER=Stack /STK=26 /UG=Hs.26685 /LL=828 /UG\_GENE=CAPS /UG\_TITLE=calcyphosine•0.149313947•0.178546824•calcyphosine•CAPS•Hs.549024•ENSG00000105519•7242 // intracellular signaling cascade // traceable author statement••5509 // calcium ion binding // inferred from electronic annotation /// 5509 // calcium ion binding // traceable author statement

206070\_s\_at•"gb:AF213459.1 /DB\_XREF=gi:12003434 /GEN=EPHA3 /FEA=FLmRNA /CNT=20 /TID=Hs.123642.0 /TIER=FL /STK=0 /UG=Hs.123642 /LL=2042 /DEF=Homo sapiens ephrin receptor EPHA3 complete form (EPHA3) mRNA, complete cds. /PROD=ephrin receptor EPHA3 complete form /FL=gb:NM"•0.148807676•0.09370497•EPH receptor A3•EPHA3•Hs.123642•ENSG00000044524•6468 // protein amino acid phosphorylation // inferred from electronic annotation /// 7165 // signal transduction // traceable author statement /// 7169 // transmembrane receptor protein tyrosine kinase signaling pathway // inferred from electronic annota•5887 // integral to plasma membrane // traceable author statement /// 16020 // membrane // inferred from electronic annotation•4674 // protein serine/threonine kinase activity // inferred from electronic annotation /// 4713 // protein-tyrosine kinase activity // inferred from electronic annotation /// 4872 // receptor activity // inferred from electronic annotation /// 5003 // ep

227404\_s\_at•gb:AI459194 /DB\_XREF=gi:4311773 /DB\_XREF=tj54g06.x1 /CLONE=IMAGE:2145370 /FEA=EST /CNT=42 /TID=Hs.326035.1 /TIER=Stack /STK=26 /UG=Hs.326035 /LL=1958 /UG\_GENE=EGR1 /UG\_TITLE=early growth response 1•0.147997489•0.272497284•Early growth response 1•EGR1•Hs.326035•ENSG00000120738•"6350 // transcription // inferred from electronic annotation /// 6355 // regulation of transcription, DNA-dependent // inferred from electronic annotation"•5634 // nucleus // inferred from electronic annotation•3700 // transcription factor activity // traceable author statement /// 8270 // zinc ion binding // inferred from electronic annotation

224973\_at•gb:AL078599 /DB\_XREF=gi:5804908 /FEA=DNA /CNT=155 /TID=Hs.10784.3 /TIER=Stack /STK=60 /UG=Hs.10784 /LL=55603 /UG\_GENE=FLJ20037 /UG\_TITLE=hypothetical protein FLJ20037 /DEF=Human DNA sequence from clone RP5-991C6 on chromosome 6q14.1-15. Contains the gene •0.147743838•0.260987778•"family with sequence similarity 46, member A"•FAM46A•Hs.10784•ENSG00000112773•••

233329\_s\_at•"gb:AK025986.1 /DB\_XREF=gi:10438677 /FEA=mRNA /CNT=3 /TID=Hs.5721.1 /TIER=ConsEnd /STK=0 /UG=Hs.5721 /LL=51315 /UG\_GENE=LOC51315 /UG\_TITLE=hypothetical protein /DEF=Homo sapiens cDNA: FLJ22333 fis, clone HRC05801, highly similar to AF217520 Homo sapiens un"•0.147674822•0.170536723•hypothetical protein LOC51315•LOC51315•Hs.469254•ENSG00000172086•••

218303\_x\_at•"gb:NM\_016618.1 /DB\_XREF=gi:7706155 /GEN=LOC51315 /FEA=FLmRNA /CNT=127 /TID=Hs.5721.0 /TIER=FL+Stack /STK=35 /UG=Hs.5721 /LL=51315 /DEF=Homo sapiens hypothetical protein (LOC51315), mRNA. /PROD=hypothetical protein /FL=gb:AF217520.1 gb:NM\_016618.1

gb:AF208"•0.146342337•0.066109514•hypothetical protein  
LOC51315•LOC51315•Hs.469254•ENSG00000172086•••  
210095\_s\_at•gb:M31159.1 /DB\_XREF=gi:183115 /GEN=IGFBP1 /FEA=FLmRNA /CNT=41  
/TID=Hs.77326.0 /TIER=FL /STK=0 /UG=Hs.77326 /LL=3486 /UG\_TITLE=insulin-like  
growth factor binding protein 3 /DEF=Human growth hormone-dependent  
insulin-like growth factor-binding protein  
mRNA•0.145254545•0.245586144•insulin-like growth factor binding protein  
3•IGFBP3•Hs.450230•ENSG00000146674•1558 // regulation of cell growth //  
inferred from electronic annotation /// 9968 // negative regulation of signal  
transduction // non-traceable author statement /// 43065 // positive  
regulation of apoptosis // inferred from mutant phenotype /// 45663 // •5576  
// extracellular region // inferred from electronic annotation /// 5576 //  
extracellular region // non-traceable author statement•5520 // insulin-like  
growth factor binding // inferred from electronic annotation /// 5520 //  
insulin-like growth factor binding // non-traceable author statement /// 8160  
// protein tyrosine phosphatase activator activity // inferred from direct  
assay //  
216268\_s\_at•"gb:U77914.1 /DB\_XREF=gi:1684889 /FEA=mRNA /CNT=2 /TID=Hs.91143.3  
/TIER=ConsEnd /STK=0 /UG=Hs.91143 /LL=182 /UG\_GENE=JAG1 /DEF=Human soluble  
protein Jagged mRNA, partial cds. /PROD=soluble protein  
Jagged"•0.141987241•0.125527815•jagged 1 (Alagille  
syndrome)•JAG1•Hs.224012•ENSG00000101384•1525 // angiogenesis //  
non-traceable author statement /// 1709 // cell fate determination //  
non-traceable author statement /// 7154 // cell communication // inferred  
from electronic annotation /// 7219 // Notch signaling pathway //  
non-traceable author •5576 // extracellular region // non-traceable author  
statement /// 5887 // integral to plasma membrane // non-traceable author  
statement /// 16020 // membrane // traceable author statement•5112 // Notch  
binding // non-traceable author statement /// 5198 // structural molecule  
activity // non-traceable author statement /// 5509 // calcium ion binding //  
inferred from electronic annotation /// 5509 // calcium ion binding //  
non-traceable auth  
235372\_at•"gb:AW575245 /DB\_XREF=gi:7246784  
/DB\_XREF=UI-HF-BK0-aaw-h-09-0-UI.s1 /CLONE=IMAGE:3055360 /FEA=EST /CNT=12  
/TID=Hs.266331.1 /TIER=ConsEnd /STK=7 /UG=Hs.266331 /UG\_TITLE=ESTs, Weakly  
similar to A39878 Fc gamma (H.sapiens)"•0.141671217•0.079722431•Fc receptor  
homolog expressed in B cells•FREB•Hs.266331•ENSG00000132185•••4872 //  
receptor activity // inferred from electronic annotation  
205110\_s\_at•"gb:NM\_004114.1 /DB\_XREF=gi:4758365 /GEN=FGF13 /FEA=FLmRNA  
/CNT=55 /TID=Hs.6540.0 /TIER=FL+Stack /STK=30 /UG=Hs.6540 /LL=2258 /DEF=Homo  
sapiens fibroblast growth factor 13 (FGF13), mRNA. /PROD=fibroblast growth  
factor 13 /FL=gb:AF100143.1 gb:NM\_004114.1  
gb"•0.140677277•0.08270913•fibroblast growth factor  
13•FGF13•Hs.6540•ENSG00000129682•7165 // signal transduction // traceable  
author statement /// 7267 // cell-cell signaling // traceable author  
statement /// 7399 // neurogenesis // traceable author statement•5615 //  
extracellular space // not recorded•8083 // growth factor activity //  
traceable author statement  
209348\_s\_at•"gb:AF055376.1 /DB\_XREF=gi:3335147 /GEN=c-maf /FEA=FLmRNA  
/CNT=175 /TID=Hs.30250.1 /TIER=FL+Stack /STK=20 /UG=Hs.30250 /LL=4094  
/DEF=Homo sapiens short form transcription factor C-MAF (c-maf) mRNA,  
complete cds. /PROD=short form transcription factor C-MAF  
"•0.136001137•0.195376072•v-maf musculoaponeurotic fibrosarcoma oncogene  
homolog (avian)•MAF•Hs.134859•ENSG00000178573•"6350 // transcription //  
inferred from electronic annotation /// 6355 // regulation of transcription,  
DNA-dependent // inferred from electronic annotation /// 6366 //  
transcription from RNA polymerase II promoter // traceable author  
statement"•785 // chromatin // traceable author statement /// 5634 // nucleus  
// inferred from electronic annotation•3677 // DNA binding // inferred from  
electronic annotation /// 3702 // RNA polymerase II transcription factor  
activity // traceable author statement  
204916\_at•"gb:NM\_005855.1 /DB\_XREF=gi:5032018 /GEN=RAMP1 /FEA=FLmRNA /CNT=71  
/TID=Hs.32989.0 /TIER=FL+Stack /STK=27 /UG=Hs.32989 /LL=10267 /DEF=Homo  
sapiens receptor (calcitonin) activity modifying protein 1 (RAMP1), mRNA.  
/PROD=receptor (calcitonin) activity modify"•0.13566716•0.17045588•receptor  
(calcitonin) activity modifying protein  
1•RAMP1•Hs.471783•ENSG00000132329•6810 // transport // inferred from  
electronic annotation /// 6886 // intracellular protein transport // inferred  
from electronic annotation /// 8277 // regulation of G-protein coupled  
receptor protein signaling pathway // traceable author statement•5886 //  
plasma membrane // traceable author statement /// 5887 // integral to plasma  
membrane // traceable author statement•4872 // receptor activity // inferred  
from electronic annotation /// 8565 // protein transporter activity //  
traceable author statement  
204743\_at•"gb:NM\_013259.1 /DB\_XREF=gi:10047091 /GEN=NP25 /FEA=FLmRNA /CNT=59  
/TID=Hs.169330.0 /TIER=FL+Stack /STK=28 /UG=Hs.169330 /LL=29114 /DEF=Homo  
sapiens neuronal protein (NP25), mRNA. /PROD=neuronal protein  
/FL=gb:NM\_013259.1 gb:AF112201.1"•0.134255511•0.093989165•transgelin  
3•TAGLN3•Hs.169330•ENSG00000144834•7417 // central nervous system development  
// traceable author statement /// 7517 // muscle development // inferred from  
electronic annotation••

228490\_at\*"gb:AW292816 /DB\_XREF=gi:6699452 /DB\_XREF=UI-H-BW0-aij-h-04-0-UI.s1 /CLONE=IMAGE:2729695 /FEA=EST /CNT=25 /TID=Hs.18948.0 /TIER=Stack /STK=18 /UG=Hs.18948 /UG\_TITLE=ESTs, Highly similar to A31026 probable membrane receptor protein (H.sapiens)"\*0.132610356\*0.387854506\*abhydrolase domain containing 2\*ABHD2\*Hs.122337\*ENSG00000140526\*\*16021 // integral to membrane // non-traceable author statement\*3824 // catalytic activity // inferred from electronic annotation

221042\_s\_at\*"gb:NM\_024734.1 /DB\_XREF=gi:13376053 /GEN=FLJ12383 /FEA=FLmRNA /CNT=2 /TID=Hs.118164.0 /TIER=FL /STK=0 /UG=Hs.118164 /LL=79789 /DEF=Homo sapiens hypothetical protein FLJ12383 (FLJ12383), mRNA. /PROD=hypothetical protein FLJ12383 /FL=gb:NM\_024734.1"\*0.128960122\*0.347822935\*"calmin (calponin-like, transmembrane)"\*CLMN\*Hs.301478\*ENSG00000165959\*\*16021 // integral to membrane // inferred from electronic annotation\*3779 // actin binding // inferred from electronic annotation

227826\_s\_at\*"gb:AW138143 /DB\_XREF=gi:6142543 /DB\_XREF=UI-H-BI1-acy-b-09-0-UI.s1 /CLONE=IMAGE:2715976 /FEA=EST /CNT=32 /TID=Hs.71721.0 /TIER=Stack /STK=16 /UG=Hs.71721 /UG\_TITLE=ESTs\*0.128402204\*0.141862433\*Arg/Abl-interacting protein ArgBP2\*ARGBP2\*Hs.481342\*ENSG00000154556\*\*5634 // nucleus // inferred from electronic annotation /// 5634 // nucleus // non-traceable author statement /// 5634 // nucleus // traceable author statement /// 5856 // cytoskeleton // inferred from electronic annotation /// 15629 // actin cytoskeleton \*3676 // nucleic acid binding // inferred from electronic annotation /// 5200 // structural constituent of cytoskeleton // traceable author statement /// 5515 // protein binding // non-traceable author statement /// 8093 // cytoskeletal adaptor activity //

236277\_at\*"gb:H23551 /DB\_XREF=gi:892246 /DB\_XREF=ym53e01.s1 /CLONE=IMAGE:51798 /FEA=EST /CNT=10 /TID=Hs.30974.0 /TIER=ConsEnd /STK=7 /UG=Hs.30974 /UG\_TITLE=ESTs\*0.126201227\*0.349790115\*P21 (CDKN1A)-activated kinase 3\*PAK3\*Hs.390616\*ENSG00000077264\*6468 // protein amino acid phosphorylation // not recorded\*\*4674 // protein serine/threonine kinase activity // not recorded /// 4713 // protein-tyrosine kinase activity // inferred from electronic annotation /// 5524 // ATP binding // inferred from electronic annotation /// 16740 // transferase activity // inferr

205523\_at\*"gb:U43328.1 /DB\_XREF=gi:1151008 /FEA=FLmRNA /CNT=44 /TID=Hs.2799.0 /TIER=FL+Stack /STK=19 /UG=Hs.2799 /LL=1404 /UG\_GENE=CRTL1 /DEF=Human link protein mRNA, complete cds. /PROD=link protein /FL=gb:NM\_001884.1 gb:U43328.1"\*0.125689477\*0.138332887\*hyaluronan and proteoglycan link protein 1\*HAPLN1\*Hs.2799\*ENSG00000145681\*7155 // cell adhesion // inferred from electronic annotation\*5578 // extracellular matrix (sensu Metazoa) // traceable author statement\*5540 // hyaluronic acid binding // inferred from electronic annotation

209686\_at\*"gb:BC001766.1 /DB\_XREF=gi:12804680 /FEA=FLmRNA /CNT=139 /TID=Hs.83384.0 /TIER=FL+Stack /STK=47 /UG=Hs.83384 /LL=6285 /UG\_GENE=S100B /DEF=Homo sapiens, S100 calcium-binding protein, beta (neural), clone MGC:1323, mRNA, complete cds. /PROD=S100 calcium-bind"\*0.125238465\*0.099309785\*"S100 calcium binding protein, beta (neural)"\*S100B\*Hs.422181\*ENSG00000160307\*6112 // energy reserve metabolism // inferred from sequence or structural similarity /// 6874 // calcium ion homeostasis // inferred from sequence or structural similarity /// 6917 // induction of apoptosis // inferred from sequence or structural similarity\*5576 // extracellular region // inferred from sequence or structural similarity /// 5634 // nucleus // inferred from electronic annotation /// 5737 // cytoplasm // inferred from sequence or structural similarity\*5509 // calcium ion binding // inferred from sequence or structural similarity /// 5509 // calcium ion binding // non-traceable author statement /// 8270 // zinc ion binding // inferred from sequence or structural similarity /// 19210 // kinase inhibitor

206513\_at\*"gb:NM\_004833.1 /DB\_XREF=gi:4757733 /GEN=AIM2 /FEA=FLmRNA /CNT=15 /TID=Hs.105115.0 /TIER=FL /STK=7 /UG=Hs.105115 /LL=9447 /DEF=Homo sapiens absent in melanoma 2 (AIM2), mRNA. /PROD=absent in melanoma 2 /FL=gb:AF024714.1 gb:NM\_004833.1"\*0.124209322\*0.078612815\*absent in melanoma 2\*AIM2\*Hs.281898\*ENSG00000163568\*6955 // immune response // traceable author statement\*\*

230895\_at\*"gb:AI760252 /DB\_XREF=gi:5175919 /DB\_XREF=wg59b07.x1 /CLONE=IMAGE:2369365 /FEA=EST /CNT=10 /TID=Hs.43227.0 /TIER=Stack /STK=8 /UG=Hs.43227 /UG\_TITLE=ESTs\*0.123969626\*0.073142275\*Hyaluronan and proteoglycan link protein 1\*HAPLN1\*Hs.2799\*ENSG00000145681\*7155 // cell adhesion // inferred from electronic annotation\*5578 // extracellular matrix (sensu Metazoa) // traceable author statement\*5540 // hyaluronic acid binding // inferred from electronic annotation

242488\_at\*"gb:R55784 /DB\_XREF=gi:825859 /DB\_XREF=yg89g05.s1 /CLONE=IMAGE:40842 /FEA=EST /CNT=5 /TID=Hs.140942.0 /TIER=ConsEnd /STK=2 /UG=Hs.140942 /UG\_TITLE=ESTs\*0.123399634\*0.168928224\*"CDNA FLJ38396 fis, clone FEBRA2007957"\*\*Hs.155736\*\*\*\*

205524\_s\_at\*"gb:NM\_001884.1 /DB\_XREF=gi:4503052 /GEN=CRTL1 /FEA=FLmRNA /CNT=44 /TID=Hs.2799.0 /TIER=FL /STK=1 /UG=Hs.2799 /LL=1404 /DEF=Homo sapiens cartilage linking protein 1 (CRTL1), mRNA. /PROD=cartilage linking protein 1 /FL=gb:NM\_001884.1 gb:U43328.1"\*0.122111364\*0.086582551\*hyaluronan and proteoglycan link protein 1\*HAPLN1\*Hs.2799\*ENSG00000145681\*7155 // cell adhesion // inferred from electronic annotation\*5578 // extracellular matrix

(sensu Metazoa) // traceable author statement•5540 // hyaluronic acid binding  
// inferred from electronic annotation  
214660\_at•"gb:X68742.1 /DB\_XREF=gi:33949 /FEA=mRNA /CNT=96 /TID=Hs.116774.0  
/TIER=ConsEnd /STK=0 /UG=Hs.116774 /LL=3672 /UG\_GENE=ITGA1  
/UG\_TITLE=integrin, alpha 1 /DEF=H.sapiens mRNA for integrin, alpha  
subunit."•0.121832295•0.147977257•"Integrin, alpha  
1"•PELO•Hs.519304•ENSG00000152684•6412 // protein biosynthesis // inferred  
from electronic annotation•5634 // nucleus // inferred from electronic  
annotation•  
1554332\_a\_at•"gb:BC025345.1 /DB\_XREF=gi:19263726 /TID=Hs2.211250.1 /CNT=4  
/FEA=FLmRNA /TIER=FL /STK=2 /UG=Hs.211250 /DEF=Homo sapiens, Similar to  
LOC149651, clone MGC:39393 IMAGE:4862156, mRNA, complete cds. /PROD=Similar  
to LOC149651 /FL=gb:BC025345.1"•0.120354021•0.083533171•"Solute carrier  
organic anion transporter family, member  
4A1"•SLCO4A1•Hs.235782•ENSG00000101187•6811 // ion transport // inferred from  
electronic annotation•16020 // membrane // inferred from electronic  
annotation /// 16021 // integral to membrane // inferred from electronic  
annotation•5215 // transporter activity // inferred from electronic  
annotation  
209425\_at•gb:AA888589 /DB\_XREF=gi:3004264 /DB\_XREF=oe68e10.s1  
/CLONE=IMAGE:1416810 /FEA=FLmRNA /CNT=163 /TID=Hs.128749.0 /TIER=ConsEnd  
/STK=5 /UG=Hs.128749 /LL=23600 /UG\_GENE=AMACR /UG\_TITLE=alpha-methylacyl-CoA  
racemase /FL=gb:NM\_014324.1 gb:AF047020.1  
gb:AF158378•0.120167777•0.100646725••••••••  
217875\_s\_at•"gb:NM\_020182.1 /DB\_XREF=gi:9910497 /GEN=TMPEAI /FEA=FLmRNA  
/CNT=273 /TID=Hs.83883.0 /TIER=FL /STK=0 /UG=Hs.83883 /LL=56937 /DEF=Homo  
sapiens transmembrane, prostate androgen induced RNA (TMPEAI), mRNA.  
/PROD=transmembrane, prostate androgen induced RNA  
/F"•0.119388873•0.131898635•"transmembrane, prostate androgen induced  
RNA"•TMPEAI•Hs.517155•ENSG00000124225•30521 // androgen receptor signaling  
pathway // non-traceable author statement•16021 // integral to membrane //  
non-traceable author statement•  
209610\_s\_at•"gb:BF340083 /DB\_XREF=gi:11286545 /DB\_XREF=602037236F1  
/CLONE=IMAGE:4185248 /FEA=FLmRNA /CNT=59 /TID=Hs.323878.0 /TIER=ConsEnd  
/STK=0 /UG=Hs.323878 /LL=6509 /UG\_GENE=SLC1A4 /UG\_TITLE=solute carrier family  
1 (glutamate/neutral amino acid transporter),  
member"•0.117962009•0.131483292•"solute carrier family 1 (glutamate/neutral  
amino acid transporter), member 4"•SLC1A4•Hs.323878•ENSG00000115902•6810 //  
transport // inferred from electronic annotation /// 6835 // dicarboxylic  
acid transport // inferred from electronic annotation /// 15804 // neutral  
amino acid transport // traceable author statement•5624 // membrane fraction  
// traceable author statement /// 5887 // integral to plasma membrane //  
traceable author statement /// 16020 // membrane // inferred from electronic  
annotation•15175 // neutral amino acid transporter activity // traceable  
author statement /// 15293 // symporter activity // inferred from electronic  
annotation /// 17153 // sodium:dicarboxylate symporter activity // inferred  
from electronic annotation  
1569469\_a\_at•"gb:BC040321.1 /DB\_XREF=gi:26007890 /TID=Hs2.403934.1 /CNT=5  
/FEA=mRNA /TIER=ConsEnd /STK=0 /UG=Hs.403934 /UG\_TITLE=Homo sapiens, Similar  
to LIM homeobox protein 8, clone IMAGE:4797854, mRNA /DEF=Homo sapiens,  
Similar to LIM homeobox protein 8, clone IMAGE"•0.116936614•0.433121038•LIM  
homeobox 8•LHX8•Hs.403934•ENSG00000162624•"6355 // regulation of  
transcription, DNA-dependent // inferred from electronic annotation"•5634 //  
nucleus // inferred from electronic annotation•3700 // transcription factor  
activity // inferred from electronic annotation /// 8270 // zinc ion binding  
// inferred from electronic annotation  
231935\_at•gb:AL133109.1 /DB\_XREF=gi:6453595 /GEN=DKFZp566N1047 /FEA=mRNA  
/CNT=24 /TID=Hs.21333.0 /TIER=ConsEnd /STK=0 /UG=Hs.21333 /DEF=Homo sapiens  
mRNA; cDNA DKFZp566N1047 (from clone DKFZp566N1047); partial cds.  
/PROD=hypothetical protein•0.116889062•0.074991137•"cyclic AMP-regulated  
phosphoprotein, 21 kD"•ARPP-21•Hs.475902•ENSG00000172995••••3676 // nucleic  
acid binding // inferred from electronic annotation  
213338\_at•gb:BF062629 /DB\_XREF=gi:10821539 /DB\_XREF=7h62h07.x1  
/CLONE=IMAGE:3320605 /FEA=mRNA /CNT=52 /TID=Hs.35861.0 /TIER=Stack /STK=26  
/UG=Hs.35861 /LL=25907 /UG\_GENE=DKFZP586E1621 /UG\_TITLE=DKFZP586E1621  
protein•0.116878858•0.132585705•Ras-induced senescence 1•RIS1•Hs.35861••••  
215363\_x\_at•"gb:AW168915 /DB\_XREF=gi:6400440 /DB\_XREF=xj15b10.x1  
/CLONE=IMAGE:2657275 /FEA=mRNA /CNT=4 /TID=Hs.283946.0 /TIER=ConsEnd /STK=3  
/UG=Hs.283946 /UG\_TITLE=Homo sapiens prostate-specific membrane antigen PSM  
mRNA, exon 18 alternative splice variant, partial  
c"•0.116240554•0.066948898•folate hydrolase (prostate-specific membrane  
antigen) 1•FOLH1•Hs.380325•ENSG00000086205•6508 // proteolysis and  
peptidolysis // non-traceable author statement•5624 // membrane fraction //  
traceable author statement /// 5887 // integral to plasma membrane //  
traceable author statement /// 16020 // membrane // non-traceable author  
statement•4180 // carboxypeptidase activity // inferred from electronic  
annotation /// 8237 // metalloproteinase activity // inferred from electronic  
annotation /// 16805 // dipeptidase activity // inferred from electronic  
annotation /// 43275 // glutamate carboxype  
206640\_x\_at•"gb:NM\_001477.1 /DB\_XREF=gi:4503888 /GEN=GAGE7B /FEA=FLmRNA  
/CNT=12 /TID=Hs.251677.0 /TIER=FL /STK=0 /UG=Hs.251677 /LL=26748 /DEF=Homo



/UG=Hs.77326 /LL=3486 /UG\_GENE=IGFBP3 /UG\_TITLE=insulin-like growth factor binding protein 3 /FL=gb:NM\_000598.1\*0.109697262\*0.221369249\*insulin-like growth factor binding protein 3\*IGFBP3\*Hs.450230\*ENSG00000146674\*1558 // regulation of cell growth // inferred from electronic annotation /// 9968 // negative regulation of signal transduction // non-traceable author statement /// 43065 // positive regulation of apoptosis // inferred from mutant phenotype /// 45663 // \*5576 // extracellular region // inferred from electronic annotation /// 5576 // extracellular region // non-traceable author statement\*5520 // insulin-like growth factor binding // inferred from electronic annotation /// 5520 // insulin-like growth factor binding // non-traceable author statement /// 8160 // protein tyrosine phosphatase activator activity // inferred from direct assay // 238689\_at\*"gb:BG426455 /DB\_XREF=gi:13332961 /DB\_XREF=602492853F1 /CLONE=IMAGE:4606932 /FEA=EST /CNT=9 /TID=Hs.256897.0 /TIER=ConsEnd /STK=0 /UG=Hs.256897 /UG\_TITLE=ESTs, Weakly similar to dJ365012.1 (H.sapiens)"\*0.108025082\*0.393579478\*G protein-coupled receptor 110\*GPR110\*Hs.256897\*ENSG00000153292\*7165 // signal transduction // inferred from electronic annotation /// 7218 // neuropeptide signaling pathway // inferred from electronic annotation\*16020 // membrane // inferred from electronic annotation /// 16021 // integral to membrane // inferred from electronic annotation\*4872 // receptor activity // inferred from electronic annotation /// 4930 // G-protein coupled receptor activity // inferred from electronic annotation 231040\_at\*"gb:AW512988 /DB\_XREF=gi:7151066 /DB\_XREF=xt76b02.x1 /CLONE=IMAGE:2792331 /FEA=EST /CNT=9 /TID=Hs.184780.0 /TIER=Stack /STK=9 /UG=Hs.184780 /UG\_TITLE=ESTs\*0.107947505\*0.2027467\*"CDNA FLJ43172 fis, clone FCBBF3007242"\*Hs.446660\* 205816\_at\*"gb:NM\_002214.1 /DB\_XREF=gi:4504778 /GEN=ITGB8 /FEA=FLmRNA /CNT=26 /TID=Hs.52620.0 /TIER=FL /STK=0 /UG=Hs.52620 /LL=3696 /DEF=Homo sapiens integrin, beta 8 (ITGB8), mRNA. /PROD=integrin, beta 8 /FL=gb:NM\_002214.1 gb:M73780.1"\*0.107837992\*0.187497338\*"integrin, beta 8"\*ITGB8\*Hs.285724\*ENSG00000105855\*7160 // cell-matrix adhesion // inferred from electronic annotation /// 7229 // integrin-mediated signaling pathway // inferred from electronic annotation\*8305 // integrin complex // traceable author statement /// 16021 // integral to membrane // inferred from electronic annotation\*4872 // receptor activity // inferred from electronic annotation /// 5515 // protein binding // inferred from electronic annotation 229831\_at\*"gb:BE221817 /DB\_XREF=gi:8909135 /DB\_XREF=hr59h08.x1 /CLONE=IMAGE:3132831 /FEA=mRNA /CNT=17 /TID=Hs.35089.0 /TIER=Stack /STK=8 /UG=Hs.35089 /LL=5067 /UG\_GENE=CNTN3 /UG\_TITLE=contactin 3 (plasmacytoma associated)\*0.107103389\*0.079832617\*contactin 3 (plasmacytoma associated)\*CNTN3\*Hs.12723\*ENSG00000113805\*7155 // cell adhesion // inferred from electronic annotation\*16020 // membrane // inferred from electronic annotation\*5515 // protein binding // inferred from electronic annotation 1553033\_at\*"gb:NM\_138780.1 /DB\_XREF=gi:20270304 /GEN=SYTL5 /TID=Hs2.367758.1 /CNT=2 /FEA=FLmRNA /TIER=FL /STK=2 /LL=94122 /UG=Hs.367758 /DEF=Homo sapiens synaptotagmin-like 5 (SYTL5), mRNA. /PROD=synaptotagmin-like 5 /FL=gb:NM\_138780.1 gb:AB080222.1"\*0.106382071\*0.228294406\*synaptotagmin-like 5\*SYTL5\*Hs.97774\*ENSG00000147041\*6886 // intracellular protein transport // inferred from electronic annotation\*5515 // protein binding // inferred from electronic annotation /// 17137 // Rab GTPase binding // inferred from electronic annotation 209459\_s\_at\*"gb:AF237813.1 /DB\_XREF=gi:9963907 /FEA=FLmRNA /CNT=144 /TID=Hs.283675.0 /TIER=FL+Stack /STK=50 /UG=Hs.283675 /LL=57416 /UG\_GENE=NPD009 /DEF=Homo sapiens NPD009 mRNA, complete cds. /PROD=NPD009 /FL=gb:NM\_020686.1 gb:AF237813.1"\*0.105606686\*0.35370866\*4-aminobutyrate aminotransferase\*ABAT\*Hs.336768\*ENSG00000183044\*7268 // synaptic transmission // non-traceable author statement /// 9448 // gamma-aminobutyric acid metabolism // inferred from electronic annotation /// 42135 // neurotransmitter catabolism // inferred from electronic annotation\*5759 // mitochondrial matrix // non-traceable author statement\*3867 // 4-aminobutyrate transaminase activity // non-traceable author statement /// 16740 // transferase activity // inferred from electronic annotation /// 30170 // pyridoxal phosphate binding // inferred from electronic annotation /// 47298 // (S)-3-ami 231729\_s\_at\*"gb:NM\_004058.1 /DB\_XREF=gi:4757907 /GEN=CAPS /FEA=FLmRNA /CNT=10 /TID=Hs.26685.1 /TIER=FL /STK=0 /UG=Hs.26685 /LL=828 /DEF=Homo sapiens calcyphosine (CAPS), mRNA. /PROD=calcyphosine /FL=gb:NM\_004058.1"\*0.105054705\*0.121922884\*calcyphosine\*CAPS\*Hs.549024\*ENSG00000105519\*7242 // intracellular signaling cascade // traceable author statement\*5509 // calcium ion binding // inferred from electronic annotation /// 5509 // calcium ion binding // traceable author statement 206214\_at\*"gb:NM\_005084.1 /DB\_XREF=gi:4826883 /GEN=PLA2G7 /FEA=FLmRNA /CNT=21 /TID=Hs.93304.0 /TIER=FL+Stack /STK=8 /UG=Hs.93304 /LL=7941 /DEF=Homo sapiens phospholipase A2, group VII (platelet-activating factor acetylhydrolase, plasma) (PLA2G7), mRNA. /PROD=phospho"\*0.103817825\*0.293810062\*"phospholipase A2, group VII (platelet-activating factor acetylhydrolase, plasma) /// phospholipase A2, group VII (platelet-activating factor acetylhydrolase, plasma)"\*PLA2G7\*Hs.93304\*ENSG00000146070\*6954 // inflammatory response // traceable author statement /// 16042 // lipid catabolism // inferred from



electronic annotation•5576 // extracellular region // traceable author statement /// 8247 // 2-acetyl-1-alkylglycerophosphocholine esterase complex // inferred from electronic annotation•3847 // 1-alkyl-2-acetyl-glycerophosphocholine esterase activity // inferred from electronic annotation /// 5543 // phospholipid binding // traceable author statement /// 16787 // hydrolase activity // inferred from electronic annotation  
212811\_x\_at•gb:AI889380 /DB\_XREF=gi:5594544 /DB\_XREF=wm98e02.x1 /CLONE=IMAGE:2443994 /FEA=EST /CNT=108 /TID=Hs.286049.2 /TIER=Stack /STK=22 /UG=Hs.286049 /LL=29968 /UG\_GENE=PSA /UG\_TITLE=phosphoserine aminotransferase•0.103652418•0.105139694•"solute carrier family 1 (glutamate/neutral amino acid transporter), member 4"•SLC1A4•Hs.323878•ENSG00000115902•6810 // transport // inferred from electronic annotation /// 6835 // dicarboxylic acid transport // inferred from electronic annotation /// 15804 // neutral amino acid transport // traceable author statement•5624 // membrane fraction // traceable author statement /// 5887 // integral to plasma membrane // traceable author statement /// 16020 // membrane // inferred from electronic annotation•15175 // neutral amino acid transporter activity // traceable author statement /// 15293 // symporter activity // inferred from electronic annotation /// 17153 // sodium:dicarboxylate symporter activity // inferred from electronic annotation  
228635\_at•gb:AI640307 /DB\_XREF=gi:4703416 /DB\_XREF=wa16f11.x1 /CLONE=IMAGE:2298285 /FEA=mRNA /CNT=26 /TID=Hs.146858.0 /TIER=Stack /STK=8 /UG=Hs.146858 /LL=57575 /UG\_GENE=PCDH10 /UG\_TITLE=protocadherin 10•0.101703829•0.124060607•protocadherin 10•PCDH10•Hs.192859•ENSG00000138650•7155 // cell adhesion // inferred from electronic annotation /// 7156 // homophilic cell adhesion // inferred from electronic annotation•16020 // membrane // inferred from electronic annotation /// 16021 // integral to membrane // inferred from electronic annotation•5509 // calcium ion binding // inferred from electronic annotation /// 5515 // protein binding // inferred from electronic annotation 205899\_at•"gb:NM\_003914.1 /DB\_XREF=gi:4502610 /GEN=CCNA1 /FEA=FLmRNA /CNT=39 /TID=Hs.79378.0 /TIER=FL+Stack /STK=23 /UG=Hs.79378 /LL=8900 /DEF=Homo sapiens cyclin A1 (CCNA1), mRNA. /PROD=cyclin A1 /FL=gb:NM\_003914.1 gb:U66838.1"•0.100625716•0.079106949•cyclin A1•CCNA1•Hs.417050•ENSG00000133101•79 // regulation of cyclin dependent protein kinase activity // not recorded /// 910 // cytokinesis // inferred from electronic annotation /// 7067 // mitosis // inferred from electronic annotation /// 7126 // meiosis // inferred from electronic annotation•5634 // nucleus // inferred from electronic annotation /// 5829 // cytosol // traceable author statement•  
235401\_s\_at•"gb:AL560266 /DB\_XREF=gi:12906564 /DB\_XREF=AL560266 /CLONE=CS0DG007YG20 (5 prime) /FEA=EST /CNT=29 /TID=Hs.266331.0 /TIER=ConsEnd /STK=0 /UG=Hs.266331 /UG\_TITLE=ESTs, Weakly similar to A39878 Fc gamma (H.sapiens)"•0.100208492•0.167202032•Fc receptor homolog expressed in B cells•FREB•Hs.266331•ENSG00000132185•••4872 // receptor activity // inferred from electronic annotation  
203186\_s\_at•"gb:NM\_002961.2 /DB\_XREF=gi:9845514 /GEN=S100A4 /FEA=FLmRNA /CNT=158 /TID=Hs.81256.0 /TIER=FL+Stack /STK=85 /UG=Hs.81256 /LL=6275 /DEF=Homo sapiens S100 calcium-binding protein A4 (calcium protein, calvasculin, metastasin, murine placental homolog) (S100A4"•0.10002544•0.091204395•"S100 calcium binding protein A4 (calcium protein, calvasculin, metastasin, murine placental homolog)"•S100A4•Hs.81256•ENSG00000196154•••5509 // calcium ion binding // traceable author statement  
205566\_at•"gb:NM\_007011.1 /DB\_XREF=gi:5901977 /GEN=HS1-2 /FEA=FLmRNA /CNT=30 /TID=Hs.99364.0 /TIER=FL+Stack /STK=16 /UG=Hs.99364 /LL=11057 /DEF=Homo sapiens putative transmembrane protein (HS1-2), mRNA. /PROD=putative transmembrane protein /FL=gb:NM\_007011.1"•0.097176989•0.391731358•abhydrolase domain containing 2•ABHD2•Hs.122337•ENSG00000140526••16021 // integral to membrane // non-traceable author statement•3824 // catalytic activity // inferred from electronic annotation  
231728\_at•"gb:NM\_004058.1 /DB\_XREF=gi:4757907 /GEN=CAPS /FEA=FLmRNA /CNT=10 /TID=Hs.26685.1 /TIER=FL /STK=0 /UG=Hs.26685 /LL=828 /DEF=Homo sapiens calcyphosine (CAPS), mRNA. /PROD=calcyphosine /FL=gb:NM\_004058.1"•0.094848677•0.203588093•calcyphosine•CAPS•Hs.549024•ENSG00000105519•7242 // intracellular signaling cascade // traceable author statement•5509 // calcium ion binding // inferred from electronic annotation /// 5509 // calcium ion binding // traceable author statement  
202986\_at•"gb:NM\_014862.1 /DB\_XREF=gi:7662049 /GEN=KIAA0307 /FEA=FLmRNA /CNT=136 /TID=Hs.6111.0 /TIER=FL+Stack /STK=60 /UG=Hs.6111 /LL=9915 /DEF=Homo sapiens KIAA0307 gene product (KIAA0307), mRNA. /PROD=KIAA0307 gene product /FL=gb:AB002305.1 gb:NM\_014862.1"•0.094604796•0.068925702•aryl-hydrocarbon receptor nuclear translocator 2•ARNT2•Hs.459070•ENSG00000172379•1666 // response to hypoxia // inferred from direct assay /// 1701 // embryonic development (sensu Mammalia) // inferred from sequence or structural similarity /// 6350 // transcription // inferred from electronic annotation /// 6355 // regulation of tran•5634 // nucleus // inferred from direct assay /// 5634 // nucleus // inferred from electronic annotation•3700 // transcription factor activity // inferred from electronic annotation /// 3700

// transcription factor activity // inferred from sequence or structural similarity /// 4871 // signal transducer activity // inferred from electronic annotation /// 506  
226695\_at\*gb:AA775472 /DB\_XREF=gi:2834806 /DB\_XREF=zf29b06.s1 /CLONE=IMAGE:378323 /FEA=EST /CNT=60 /TID=Hs.9071.2 /TIER=Stack /STK=47 /UG=Hs.9071 /LL=10424 /UG\_GENE=PMBP /UG\_TITLE=progesterone membrane binding protein\*0.094502012\*0.100223241\*paired related homeobox 1\*PRRX1\*Hs.283416\*ENSG00000116132\*6355 // regulation of transcription, DNA-dependent // inferred from electronic annotation /// 7275 // development // inferred from electronic annotation\*5634 // nucleus // inferred from electronic annotation\*3700 // transcription factor activity // inferred from electronic annotation /// 3713 // transcription coactivator activity // traceable author statement  
206363\_at\*"gb:NM\_005360.2 /DB\_XREF=gi:5453735 /GEN=MAF /FEA=FLmRNA /CNT=15 /TID=Hs.30250.0 /TIER=FL /STK=5 /UG=Hs.30250 /LL=4094 /DEF=Homo sapiens v-maf musculoaponeurotic fibrosarcoma (avian) oncogene homolog (MAF), mRNA. /PROD=v-maf musculoaponeurotic fibrosarcoma"\*0.091295455\*0.101234751\*v-maf musculoaponeurotic fibrosarcoma oncogene homolog (avian)\*MAF\*Hs.134859\*ENSG00000178573\*6350 // transcription // inferred from electronic annotation /// 6355 // regulation of transcription, DNA-dependent // inferred from electronic annotation /// 6366 // transcription from RNA polymerase II promoter // traceable author statement\*785 // chromatin // traceable author statement /// 5634 // nucleus // inferred from electronic annotation\*3677 // DNA binding // inferred from electronic annotation /// 3702 // RNA polymerase II transcription factor activity // traceable author statement  
222450\_at\*"gb:AL035541 /DB\_XREF=gi:11546043 /FEA=FLmRNA /CNT=273 /TID=Hs.83883.0 /TIER=Stack /STK=85 /UG=Hs.83883 /LL=56937 /UG\_GENE=TMPEAI /UG\_TITLE=transmembrane, prostate androgen induced RNA /DEF=Human DNA sequence from clone RP4-718J7 on chromosome 20q13.31-13.33."\*0.09036371\*0.119402112\*transmembrane, prostate androgen induced RNA\*TMPEAI\*Hs.517155\*ENSG00000124225\*30521 // androgen receptor signaling pathway // non-traceable author statement\*16021 // integral to membrane // non-traceable author statement\*  
1556200\_a\_at\*"gb:BC021140.1 /DB\_XREF=gi:18088969 /TID=Hs2.129481.1 /CNT=11 /FEA=mRNA /TIER=ConsEnd /STK=4 /LL=118611 /UG\_GENE=FLJ32938 /UG=Hs.129481 /UG\_TITLE=hypothetical protein FLJ32938 /DEF=Homo sapiens, Similar to RIKEN cDNA 4933400E14 gene, clone IMAGE:4871932, m"\*0.089976297\*0.122790807\*chromosome 10 open reading frame 90\*C10orf90\*Hs.44939\*ENSG00000154493\*  
222449\_at\*"gb:AL035541 /DB\_XREF=gi:10198628 /FEA=FLmRNA /CNT=273 /TID=Hs.83883.0 /TIER=Stack /STK=21 /UG=Hs.83883 /LL=56937 /UG\_GENE=TMPEAI /UG\_TITLE=transmembrane, prostate androgen induced RNA /DEF=Human DNA sequence from clone 718J7 on chromosome 20q13.31-13.33. "\*0.0842706\*0.124374955\*transmembrane, prostate androgen induced RNA\*TMPEAI\*Hs.517155\*ENSG00000124225\*30521 // androgen receptor signaling pathway // non-traceable author statement\*16021 // integral to membrane // non-traceable author statement\*  
206046\_at\*"gb:NM\_003812.1 /DB\_XREF=gi:4501912 /GEN=ADAM23 /FEA=FLmRNA /CNT=26 /TID=Hs.7164.0 /TIER=FL+Stack /STK=11 /UG=Hs.7164 /LL=8745 /DEF=Homo sapiens a disintegrin and metalloproteinase domain 23 (ADAM23), mRNA. /PROD=a disintegrin and metalloproteinase domain "\*0.084204157\*0.102485831\*a disintegrin and metalloproteinase domain 23\*ADAM23\*Hs.370287\*ENSG00000114948\*6508 // proteolysis and peptidolysis // inferred from electronic annotation /// 7155 // cell adhesion // inferred from electronic annotation /// 7417 // central nervous system development // traceable author statement\*5887 // integral to plasma membrane // traceable author statement\*4222 // metalloendopeptidase activity // inferred from electronic annotation /// 5178 // integrin binding // traceable author statement /// 5515 // protein binding // inferred from electronic annotation 215001\_s\_at\*gb:AL161952.1 /DB\_XREF=gi:7328002 /GEN=DKFZp434M0813 /FEA=mRNA /CNT=10 /TID=Hs.170171.1 /TIER=ConsEnd /STK=0 /UG=Hs.170171 /LL=2752 /DEF=Homo sapiens mRNA; cDNA DKFZp434M0813 (from clone DKFZp434M0813); partial cds. /PROD=hypothetical protein\*0.082418868\*0.462450308\*glutamate-ammonia ligase (glutamine synthase)\*GLUL\*Hs.518525\*ENSG00000135821\*1505 // regulation of neurotransmitter levels // not recorded /// 6542 // glutamine biosynthesis // inferred from electronic annotation /// 6542 // glutamine biosynthesis // not recorded /// 6807 // nitrogen compound metabolism // inferred from electronic annotation\*4356 // glutamate-ammonia ligase activity // inferred from electronic annotation /// 16874 // ligase activity // inferred from electronic annotation  
228827\_at\*gb:AI217416 /DB\_XREF=gi:3797231 /DB\_XREF=qh22h01.x1 /CLONE=IMAGE:1845457 /FEA=mRNA /CNT=28 /TID=Hs.90858.0 /TIER=Stack /STK=12 /UG=Hs.90858 /UG\_TITLE=Homo sapiens clone 25023 mRNA sequence\*0.079814977\*0.09407927\*"Runt-related transcription factor 1; translocated to, 1 (cyclin D-related)\*RUNX1T1\*Hs.368431\*ENSG00000079102\*6091 // generation of precursor metabolites and energy // traceable author statement /// 6350 // transcription // inferred from electronic annotation /// 6355 // regulation of transcription, DNA-dependent // inferred from electronic annotation\*5634

// nucleus // inferred from electronic annotation•3700 // transcription factor activity // inferred from electronic annotation /// 3700 // transcription factor activity // traceable author statement  
212942\_s\_at•"gb:AB033025.1 /DB\_XREF=gi:6330400 /GEN=KIAA1199 /FEA=mRNA /CNT=110 /TID=Hs.50081.1 /TIER=Stack /STK=30 /UG=Hs.50081 /LL=57214 /DEF=Homo sapiens mRNA for KIAA1199 protein, partial cds. /PROD=KIAA1199 protein"•0.078064868•0.056895906•KIAA1199•KIAA1199•Hs.459088•ENSG00000103888•7605 // perception of sound // inferred from electronic annotation••  
218872\_at•"gb:NM\_017899.1 /DB\_XREF=gi:8923562 /GEN=FLJ20607 /FEA=FLmRNA /CNT=78 /TID=Hs.18791.0 /TIER=FL /STK=0 /UG=Hs.18791 /LL=54997 /DEF=Homo sapiens hypothetical protein FLJ20607 (FLJ20607), mRNA. /PROD=hypothetical protein FLJ20607 /FL=gb:NM\_017899.1"•0.076566756•0.118094084•hypothetical protein FLJ20607•TSC•Hs.525709•ENSG00000088992•••5509 // calcium ion binding // inferred from electronic annotation  
202016\_at•"gb:NM\_002402.1 /DB\_XREF=gi:4505154 /GEN=MEST /FEA=FLmRNA /CNT=338 /TID=Hs.79284.0 /TIER=FL+Stack /STK=133 /UG=Hs.79284 /LL=4232 /DEF=Homo sapiens mesoderm specific transcript (mouse) homolog (MEST), mRNA. /PROD=mesoderm specific transcript (mouse) homolog"•0.076289883•0.424846248•mesoderm specific transcript homolog (mouse)•MEST•Hs.270978•ENSG00000106484•6805 // xenobiotic metabolism // inferred from electronic annotation /// 7498 // mesoderm development // traceable author statement /// 9636 // response to toxin // inferred from electronic annotation••3824 // catalytic activity // inferred from electronic annotation /// 16787 // hydrolase activity // inferred from electronic annotation  
202450\_s\_at•"gb:NM\_000396.1 /DB\_XREF=gi:4503150 /GEN=CTSK /FEA=FLmRNA /CNT=288 /TID=Hs.83942.0 /TIER=FL+Stack /STK=163 /UG=Hs.83942 /LL=1513 /DEF=Homo sapiens cathepsin K (pseudodeficiency) (CTSK), mRNA. /PROD=cathepsin K (pseudodeficiency) /FL=gb:NM\_000396.1  
gb:U13665."•0.075433961•0.099812796•cathepsin K (pseudodeficiency)•CTSK•Hs.523594•ENSG00000143387•6508 // proteolysis and peptidolysis // traceable author statement•5764 // lysosome // not recorded•4216 // cathepsin K activity // traceable author statement  
209823\_x\_at•"gb:M17955.1 /DB\_XREF=gi:188178 /FEA=FLmRNA /CNT=88 /TID=Hs.73931.2 /TIER=FL /STK=0 /UG=Hs.73931 /LL=3119 /UG\_GENE=HLA-DQB1 /UG\_TITLE=major histocompatibility complex, class II, DQ beta 1 /DEF=Human MHC class II HLA-DQ-beta mRNA, complete cds. /FL=gb:M3390"•0.074002214•0.053890145•"major histocompatibility complex, class II, DQ beta 1"•HLA-DQB1•Hs.409934••"6955 // immune response // inferred from electronic annotation /// 6955 // immune response // non-traceable author statement /// 19884 // antigen presentation, exogenous antigen // inferred from electronic annotation /// 19886 // antigen processing, exoge"•16020 // membrane // inferred from electronic annotation /// 16020 // membrane // non-traceable author statement /// 16021 // integral to membrane // inferred from electronic annotation•45012 // MHC class II receptor activity // inferred from electronic annotation /// 45012 // MHC class II receptor activity // non-traceable author statement  
238852\_at•gb:AA424567 /DB\_XREF=gi:2103537 /DB\_XREF=zv91f03.s1 /CLONE=IMAGE:767165 /FEA=EST /CNT=7 /TID=Hs.283549.0 /TIER=ConsEnd /STK=3 /UG=Hs.283549 /UG\_TITLE=ESTs•0.07382592•0.062747688•Paired related homeobox 1•PRRX1•Hs.283416•ENSG00000116132•"6355 // regulation of transcription, DNA-dependent // inferred from electronic annotation /// 7275 // development // inferred from electronic annotation"•5634 // nucleus // inferred from electronic annotation•3700 // transcription factor activity // inferred from electronic annotation /// 3713 // transcription coactivator activity // traceable author statement  
236044\_at•gb:BF130943 /DB\_XREF=gi:10969983 /DB\_XREF=601819760F1 /CLONE=IMAGE:4051623 /FEA=EST /CNT=9 /TID=Hs.40479.0 /TIER=ConsEnd /STK=0 /UG=Hs.40479 /UG\_TITLE=ESTs•0.073438667•0.065126078•phosphatidic acid phosphatase type 2 domain containing 1•PPAPDC1•Hs.40479••••  
209550\_at•"gb:U35139.1 /DB\_XREF=gi:1754970 /FEA=FLmRNA /CNT=122 /TID=Hs.50130.0 /TIER=FL+Stack /STK=51 /UG=Hs.50130 /LL=4692 /UG\_GENE=NDN /DEF=Human NECDIN related protein mRNA, complete cds. /PROD=NECDIN related protein /FL=gb:U35139.1 gb:NM\_002487.2"•0.073287067•0.087249588•necdin homolog (mouse)•NDN•Hs.50130•ENSG00000182636•"74 // regulation of cell cycle // non-traceable author statement /// 1558 // regulation of cell growth // inferred from electronic annotation /// 6350 // transcription // inferred from electronic annotation /// 6355 // regulation of transcription, DNA-dep"•5634 // nucleus // inferred from electronic annotation•3677 // DNA binding // inferred from electronic annotation  
225996\_at•gb:AV709727 /DB\_XREF=gi:10727657 /DB\_XREF=AV709727 /CLONE=ADCAZA04 /FEA=mRNA /CNT=62 /TID=Hs.21380.0 /TIER=Stack /STK=19 /UG=Hs.21380 /UG\_TITLE=Homo sapiens mRNA; cDNA DKFZp586P1124 (from clone DKFZp586P1124)•0.072656787•0.180565831•"CDNA FLJ36725 fis, clone UTERU2012230"••Hs.21380••••  
204513\_s\_at•"gb:NM\_014800.1 /DB\_XREF=gi:7662037 /GEN=KIAA0281 /FEA=FLmRNA /CNT=73 /TID=Hs.31463.0 /TIER=FL+Stack /STK=27 /UG=Hs.31463 /LL=9844 /DEF=Homo sapiens KIAA0281 gene product (KIAA0281), mRNA. /PROD=KIAA0281 gene product /FL=gb:BC003051.1 gb:NM\_014800.1  
gb:D87"•0.071908125•0.117363161•"engulfment and cell motility 1 (ced-12 homolog, C. elegans)"•ELMO1•Hs.304578•ENSG00000155849•"6911 // phagocytosis,

engulfment // inferred from genetic interaction /// 6915 // apoptosis // non-traceable author statement /// 6928 // cell motility // inferred from genetic interaction /// 16601 // Rac protein signal transduction // inferred from gene"•5737 // cytoplasm // inferred from direct assay /// 5856 // cytoskeleton // inferred from electronic annotation /// 5886 // plasma membrane // inferred from direct assay•17124 // SH3 domain binding // inferred from physical interaction

201185\_at•"gb:NM\_002775.1 /DB\_XREF=gi:4506140 /GEN=PRSS11 /FEA=FLmRNA /CNT=347 /TID=Hs.75111.0 /TIER=FL+Stack /STK=154 /UG=Hs.75111 /LL=5654 /DEF=Homo sapiens protease, serine, 11 (IGF binding) (PRSS11), mRNA. /PROD=protease, serine, 11 (IGF binding) /FL=gb:D87258.1"•0.071838285•0.039448213•"protease, serine, 11 (IGF binding)"•PRSS11•Hs.501280•ENSG00000166033•1558 // regulation of cell growth // inferred from electronic annotation /// 6508 // proteolysis and peptidolysis // inferred from electronic annotation•5615 // extracellular space // traceable author statement•4295 // trypsin activity // inferred from electronic annotation /// 5520 // insulin-like growth factor binding // inferred from electronic annotation /// 8233 // peptidase activity // inferred from electronic annotation

211258\_s\_at•"gb:AF149096.1 /DB\_XREF=gi:6175597 /FEA=FLmRNA /CNT=2 /TID=Hs.170009.1 /TIER=FL /STK=0 /UG=Hs.170009 /LL=7039 /UG\_GENE=TGFA /DEF=Homo sapiens transforming growth factor-alpha variant I mRNA, alternatively spliced product, complete cds. /PROD=transforming g"•0.070410046•0.345628682•"transforming growth factor, alpha"•TGFA•Hs.170009•ENSG00000163235•74 // regulation of cell cycle // inferred from electronic annotation /// 7267 // cell-cell signaling // not recorded /// 8283 // cell proliferation // traceable author statement•5615 // extracellular space // not recorded /// 5625 // soluble fraction // not recorded /// 5886 // plasma membrane // non-traceable author statement /// 5887 // integral to plasma membrane // not recorded•4713 // protein-tyrosine kinase activity // traceable author statement /// 4871 // signal transducer activity // traceable author statement /// 5155 // epidermal growth factor receptor activating ligand activity // not recorded /// 5515 // protein binding

205576\_at•"gb:NM\_000185.2 /DB\_XREF=gi:7262380 /GEN=SERPIND1 /FEA=FLmRNA /CNT=83 /TID=Hs.1478.0 /TIER=FL+Stack /STK=30 /UG=Hs.1478 /LL=3053 /DEF=Homo sapiens serine (or cysteine) proteinase inhibitor, clade D (heparin cofactor), member 1 (SERPIND1), mRNA. /PROD=hepar"•0.06902562•0.071191392•"serine (or cysteine) proteinase inhibitor, clade D (heparin cofactor), member 1"•SERPIND1•Hs.474270•ENSG00000099937•6935 // chemotaxis // inferred from electronic annotation /// 7596 // blood coagulation // inferred from electronic annotation /// 7600 // sensory perception // inferred from electronic annotation•5576 // extracellular region // non-traceable author statement•4867 // serine-type endopeptidase inhibitor activity // inferred from electronic annotation /// 8201 // heparin binding // inferred from electronic annotation

205991\_s\_at•"gb:NM\_006902.2 /DB\_XREF=gi:12707578 /GEN=PMX1 /FEA=FLmRNA /CNT=27 /TID=Hs.155606.0 /TIER=FL /STK=0 /UG=Hs.155606 /LL=5396 /DEF=Homo sapiens paired mesoderm homeo box 1 (PMX1), transcript variant pmx-1a, mRNA. /PROD=paired mesoderm homeobox 1, isoform pmx-"•0.068980332•0.041073178•paired related homeobox 1•PRRX1•Hs.283416•ENSG00000116132•"6355 // regulation of transcription, DNA-dependent // inferred from electronic annotation /// 7275 // development // inferred from electronic annotation"•5634 // nucleus // inferred from electronic annotation•3700 // transcription factor activity // inferred from electronic annotation /// 3713 // transcription coactivator activity // traceable author statement

206115\_at•"gb:NM\_004430.1 /DB\_XREF=gi:4758251 /GEN=EGR3 /FEA=FLmRNA /CNT=33 /TID=Hs.74088.0 /TIER=FL+Stack /STK=20 /UG=Hs.74088 /LL=1960 /DEF=Homo sapiens early growth response 3 (EGR3), mRNA. /PROD=early growth response 3 /FL=gb:NM\_004430.1"•0.06857129•0.115488468•early growth response 3•EGR3•Hs.534313•ENSG00000179388•"6350 // transcription // inferred from electronic annotation /// 6355 // regulation of transcription, DNA-dependent // inferred from electronic annotation /// 7517 // muscle development // traceable author statement /// 7623 // circadian rhythm // traceab"•5634 // nucleus // inferred from electronic annotation•3700 // transcription factor activity // traceable author statement /// 8270 // zinc ion binding // inferred from electronic annotation

225619\_at•gb:AV730849 /DB\_XREF=gi:10840270 /DB\_XREF=AV730849 /CLONE=HTFAHH11 /FEA=EST /CNT=70 /TID=Hs.173438.2 /TIER=Stack /STK=9 /UG=Hs.173438 /LL=55179 /UG\_GENE=FLJ10582 /UG\_TITLE=hypothetical protein FLJ10582•0.068549648•0.082131058•hypothetical protein FLJ30046•FLJ30046•Hs.349955•ENSG00000139737•••

230746\_s\_at•gb:AW003173 /DB\_XREF=gi:5850089 /DB\_XREF=wq63e07.x1 /CLONE=IMAGE:2475972 /FEA=EST /CNT=17 /TID=Hs.25590.1 /TIER=Stack /STK=17 /UG=Hs.25590 /LL=6781 /UG\_GENE=STC1 /UG\_TITLE=stanniocalcin 1•0.06450052•0.228403612•Stanniocalcin 1•STC1•Hs.25590•ENSG00000159167•6874 // calcium ion homeostasis // traceable author statement /// 7166 // cell surface receptor linked signal transduction // traceable author statement /// 7267 // cell-cell signaling // traceable author statement /// 7584 //

response to nutrients // tra•5576 // extracellular region // inferred from electronic annotation•5179 // hormone activity // traceable author statement 226415\_at•gb:AA156723 /DB\_XREF=gi:1728337 /DB\_XREF=z118c02.s1 /CLONE=IMAGE:502274 /FEA=mRNA /CNT=54 /TID=Hs.22975.0 /TIER=Stack /STK=19 /UG=Hs.22975 /LL=57687 /UG\_GENE=KIAA1576 /UG\_TITLE=KIAA1576

protein•0.062264316•0.07620782•KIAA1576

protein•KIAA1576•Hs.461405•ENSG00000171724•••8270 // zinc ion binding // inferred from electronic annotation /// 16491 // oxidoreductase activity // inferred from electronic annotation

206569\_at•"gb:NM\_006850.1 /DB\_XREF=gi:5803085 /GEN=ST16 /FEA=FLmRNA /CNT=12 /TID=Hs.315463.0 /TIER=FL /STK=2 /UG=Hs.315463 /LL=11009 /DEF=Homo sapiens suppression of tumorigenicity 16 (melanoma differentiation) (ST16), mRNA. /PROD=suppression of tumorigenicity 16 (m"•0.059773452•0.06970569•interleukin 24•IL24•Hs.411311•ENSG00000162892•6915 // apoptosis // traceable author statement /// 6955 // immune response // inferred from electronic annotation•5576 // extracellular region // inferred from electronic annotation•5125 // cytokine activity // inferred from electronic annotation 209765\_at•gb:Y13786.2 /DB\_XREF=gi:12053590 /FEA=FLmRNA /CNT=58 /TID=Hs.278679.1 /TIER=Stack /STK=24 /UG=Hs.278679 /LL=8728 /UG\_GENE=ADAM19 /DEF=Homo sapiens mRNA for meltrin-betaADAM 19 homologue. /PROD=meltrin-betaADAM 19 homologue /FL=gb:AF311317.1•0.056639445•0.094997402•a disintegrin and metalloproteinase domain 19 (meltrin beta)•ADAM19•Hs.483944•ENSG00000135074•6508 // proteolysis and peptidolysis // inferred from electronic annotation•16021 // integral to membrane // inferred from electronic annotation•4222 // metalloendopeptidase activity // inferred from electronic annotation /// 8270 // zinc ion binding // inferred from electronic annotation

214451\_at•"gb:NM\_003221.1 /DB\_XREF=gi:4507442 /GEN=TFAP2B /FEA=FLmRNA /CNT=25 /TID=Hs.33102.0 /TIER=FL /STK=0 /UG=Hs.33102 /LL=7021 /DEF=Homo sapiens transcription factor AP-2 beta (activating enhancer-binding protein 2 beta) (TFAP2B), mRNA. /PROD=transcription fact"•0.055867128•0.06089434•transcription factor AP-2 beta (activating enhancer binding protein 2 beta)•TFAP2B•Hs.33102•ENSG00000008196•6350 // transcription // inferred from electronic annotation /// 6357 // regulation of transcription from RNA polymerase II promoter // traceable author statement /// 7399 // neurogenesis // traceable author statement•5634 // nucleus // inferred from electronic annotation•3700 // transcription factor activity // non-traceable author statement /// 3713 // transcription coactivator activity // traceable author statement

241399\_at•gb:AI142028 /DB\_XREF=gi:3649485 /DB\_XREF=oo21g02.x1 /CLONE=IMAGE:1566866 /FEA=EST /CNT=7 /TID=Hs.143399.0 /TIER=ConsEnd /STK=4 /UG=Hs.143399 /UG\_TITLE=ESTs•0.054322261•0.093902186•"family with sequence similarity 19 (chemokine (C-C motif)-like), member A2"•FAM19A2•Hs.269745•ENSG00000198673•••

206163\_at•"gb:NM\_005584.1 /DB\_XREF=gi:5031896 /GEN=MAB21L1 /FEA=FLmRNA /CNT=27 /TID=Hs.239506.0 /TIER=FL /STK=0 /UG=Hs.239506 /LL=4081 /DEF=Homo sapiens mab-21 (C. elegans)-like 1 (MAB21L1), mRNA. /PROD=mab-21 (C. elegans)-like 1 /FL=gb:U38810.1

gb:NM\_005584.1"•0.054052943•0.071607292•mab-21-like 1 (C. elegans)•MAB21L1•Hs.532575•ENSG00000180660•9653 // morphogenesis // traceable author statement••

204288\_s\_at•"gb:NM\_021069.1 /DB\_XREF=gi:10947117 /GEN=ARGBP2 /FEA=FLmRNA /CNT=71 /TID=Hs.278626.0 /TIER=FL+Stack /STK=33 /UG=Hs.278626 /LL=8470 /DEF=Homo sapiens ArgAbl-interacting protein ArgBP2 (ARGBP2), transcript variant 2, mRNA. /PROD=ArgAbl-interacting protein 2"•0.053929572•0.098492168•Arg/Abl-interacting protein ArgBP2•ARGBP2•Hs.481342•ENSG00000154556••5634 // nucleus // inferred from electronic annotation /// 5634 // nucleus // non-traceable author statement /// 5634 // nucleus // traceable author statement /// 5856 // cytoskeleton // inferred from electronic annotation /// 15629 // actin cytoskeleton •3676 // nucleic acid binding // inferred from electronic annotation /// 5200 // structural constituent of cytoskeleton // traceable author statement /// 5515 // protein binding // non-traceable author statement /// 8093 // cytoskeletal adaptor activity //

223975\_at•"gb:BC005014.1 /DB\_XREF=gi:13477118 /FEA=FLmRNA /CNT=3 /TID=Hs.326734.0 /TIER=FL /STK=0 /UG=Hs.326734 /DEF=Homo sapiens, Similar to ring finger protein 18, clone MGC:10977, mRNA, complete cds. /PROD=Similar to ring finger protein 18 /FL=gb:BC005014.1"•0.053363868•0.049276935•tripartite motif-containing 51•TRIM51•Hs.326734•ENSG00000124900•••

219895\_at•"gb:NM\_017938.1 /DB\_XREF=gi:8923642 /GEN=FLJ20716 /FEA=FLmRNA /CNT=17 /TID=Hs.144517.0 /TIER=FL+Stack /STK=9 /UG=Hs.144517 /LL=55026 /DEF=Homo sapiens hypothetical protein FLJ20716 (FLJ20716), mRNA. /PROD=hypothetical protein FLJ20716 /FL=gb:NM\_017938.1"•0.052413734•0.183582594•hypothetical protein FLJ20716•FLJ20716•Hs.437563•ENSG00000125355•••

212998\_x\_at•"gb:AI583173 /DB\_XREF=gi:4569070 /DB\_XREF=tq64e04.x1 /CLONE=IMAGE:2213598 /FEA=EST /CNT=76 /TID=Hs.73931.3 /TIER=Stack /STK=32 /UG=Hs.73931 /LL=3119 /UG\_GENE=HLA-DQB1 /UG\_TITLE=major histocompatibility complex, class II, DQ beta 1"•0.051703705•0.054883427•"major histocompatibility complex, class II, DQ beta 1 /// major histocompatibility complex, class II, DQ beta 1"•HLA-DQB1•Hs.409934••"6955 // immune response //

inferred from electronic annotation /// 6955 // immune response //  
non-traceable author statement /// 19884 // antigen presentation, exogenous  
antigen // inferred from electronic annotation /// 19886 // antigen  
processing, exoge"•16020 // membrane // inferred from electronic annotation  
/// 16020 // membrane // non-traceable author statement /// 16021 // integral  
to membrane // inferred from electronic annotation•45012 // MHC class II  
receptor activity // inferred from electronic annotation /// 45012 // MHC  
class II receptor activity // non-traceable author statement  
235400\_at•"gb:AL560266 /DB\_XREF=gi:12906564 /DB\_XREF=AL560266  
/CLONE=CS0DG007YG20 (5 prime) /FEA=EST /CNT=29 /TID=Hs.266331.0 /TIER=ConsEnd  
/STK=0 /UG=Hs.266331 /UG\_TITLE=ESTs, Weakly similar to A39878 Fc gamma  
(H.sapiens)"•0.051478987•0.063396799•Fc receptor homolog expressed in B  
cells•FREB•Hs.266331•ENSG00000132185•••4872 // receptor activity // inferred  
from electronic annotation  
226498\_at•"gb:AA149648 /DB\_XREF=gi:1720449 /DB\_XREF=z139e08.s1  
/CLONE=IMAGE:504326 /FEA=mRNA /CNT=78 /TID=Hs.22968.0 /TIER=Stack /STK=25  
/UG=Hs.22968 /UG\_TITLE=Homo sapiens clone IMAGE:451939, mRNA  
sequence"•0.050457437•0.073344291•Fms-related tyrosine kinase 1 (vascular  
endothelial growth factor/vascular permeability factor  
receptor)•FLT1•Hs.507621•ENSG00000102755•1525 // angiogenesis // inferred  
from electronic annotation /// 6468 // protein amino acid phosphorylation //  
inferred from electronic annotation /// 7169 // transmembrane receptor  
protein tyrosine kinase signaling pathway // traceable author statement  
//•5615 // extracellular space // traceable author statement /// 5887 //  
integral to plasma membrane // traceable author statement /// 16020 //  
membrane // inferred from electronic annotation•4872 // receptor activity //  
traceable author statement /// 5021 // vascular endothelial growth factor  
receptor activity // traceable author statement /// 5524 // ATP binding //  
inferred from electronic annotation /// 16740 // transferase activity //  
infe  
216598\_s\_at•"gb:S69738.1 /DB\_XREF=gi:545464 /GEN=MCP-1 /FEA=mRNA /CNT=1  
/TID=Hs.303649.1 /TIER=ConsEnd /STK=0 /UG=Hs.303649 /LL=6347  
/DEF=MCP-1=monocyte chemotactic protein (human, aortic endothelial cells,  
mRNA, 661 nt). /PROD=MCP-1"•0.050357144•0.010537452•chemokine (C-C motif)  
ligand 2•CCL2•Hs.303649•ENSG00000108691•6468 // protein amino acid  
phosphorylation // traceable author statement /// 6874 // calcium ion  
homeostasis // traceable author statement /// 6916 // anti-apoptosis //  
inferred from direct assay /// 6935 // chemotaxis // traceable author  
statement /// 69•5615 // extracellular space // traceable author statement  
/// 16020 // membrane // inferred from electronic annotation•4672 // protein  
kinase activity // traceable author statement /// 8009 // chemokine activity  
// traceable author statement  
206897\_at•"gb:NM\_003785.2 /DB\_XREF=gi:9558760 /GEN=GAGEB1 /FEA=FLmRNA /CNT=11  
/TID=Hs.128231.0 /TIER=FL /STK=0 /UG=Hs.128231 /LL=8712 /DEF=Homo sapiens G  
antigen, family B, 1 (prostate associated) (GAGEB1), mRNA. /PROD=G antigen B1  
/FL=gb:BC004861.1 gb:NM\_003785.2 g"•0.050148587•0.052580123•"P antigen  
family, member 1 (prostate associated)"•PAGE1•Hs.128231•ENSG00000068985•6968  
// cellular defense response // traceable author statement••  
202376\_at•"gb:NM\_001085.2 /DB\_XREF=gi:9665246 /GEN=SERPINA3 /FEA=FLmRNA  
/CNT=230 /TID=Hs.234726.0 /TIER=FL+Stack /STK=128 /UG=Hs.234726 /LL=12  
/DEF=Homo sapiens serine (or cysteine) proteinase inhibitor, clade A (alpha-1  
antiproteinase, antitrypsin), member 3  
(SERPI"•0.047946601•0.038105515•"serine (or cysteine) proteinase inhibitor,  
clade A (alpha-1 antiproteinase, antitrypsin), member  
3"•SERPINA3•Hs.534293•ENSG00000196136•6953 // acute-phase response //  
inferred from electronic annotation /// 6954 // inflammatory response //  
non-traceable author statement /// 19216 // regulation of lipid metabolism //  
non-traceable author statement•5576 // extracellular region // non-traceable  
author statement /// 5622 // intracellular // non-traceable author  
statement•3677 // DNA binding // Unknown /// 4867 // serine-type  
endopeptidase inhibitor activity // inferred from electronic annotation ///  
5515 // protein binding // inferred from physical interaction /// 30569 //  
chymotrypsin inhibitor activity // non-traceable  
206953\_s\_at•"gb:NM\_012302.1 /DB\_XREF=gi:6912463 /GEN=KIAA0786 /FEA=FLmRNA  
/CNT=8 /TID=Hs.24212.0 /TIER=FL /STK=0 /UG=Hs.24212 /LL=23266 /DEF=Homo  
sapiens latrophilin (KIAA0786), mRNA. /PROD=latrophilin /FL=gb:NM\_012302.1  
gb:AF104939.1"•0.047748569•0.142770243•latrophilin  
2•LPHN2•Hs.24212•ENSG00000117114•7165 // signal transduction // inferred from  
electronic annotation /// 7218 // neuropeptide signaling pathway // inferred  
from electronic annotation•16020 // membrane // inferred from electronic  
annotation /// 16021 // integral to membrane // inferred from electronic  
annotation /// 16021 // integral to membrane // non-traceable author  
statement•4872 // receptor activity // inferred from electronic annotation  
/// 4930 // G-protein coupled receptor activity // inferred from electronic  
annotation /// 5529 // sugar binding // inferred from electronic annotation  
/// 16524 // latrotoxin receptor activ  
1559258\_a\_at•"gb:AK026566.1 /DB\_XREF=gi:10439448 /TID=Hs2.97892.1 /CNT=6  
/FEA=mRNA /TIER=ConsEnd /STK=0 /UG=Hs.97892 /UG\_TITLE=Homo sapiens cDNA:  
FLJ22913 fis, clone KAT06142. /DEF=Homo sapiens cDNA: FLJ22913 fis, clone  
KAT06142."•0.040963869•0.035241604•Hypothetical  
LOC203413•LOC203413•Hs.97892••••

227145\_at\*"gb:AW190565 /DB\_XREF=gi:6465045 /DB\_XREF=xl40b02.x1  
/CLONE=IMAGE:2677131 /FEA=mRNA /CNT=39 /TID=Hs.306814.0 /TIER=Stack /STK=15  
/UG=Hs.306814 /UG\_TITLE=Homo sapiens cDNA: FLJ21889 fis, clone  
HEP03178"0.0367853130.07990465\*lysyl oxidase-like  
4\*LOXL4\*Hs.306814\*ENSG00000138131\*16020 // membrane // inferred from  
electronic annotation\*4720 // protein-lysine 6-oxidase activity // inferred  
from electronic annotation /// 5044 // scavenger receptor activity //  
inferred from electronic annotation /// 5507 // copper ion binding //  
inferred from electronic annotation /// 16491 // oxidoreducta  
205681\_at\*"gb:NM\_004049.1 /DB\_XREF=gi:4757839 /GEN=BCL2A1 /FEA=FLmRNA /CNT=32  
/TID=Hs.227817.0 /TIER=FL+Stack /STK=11 /UG=Hs.227817 /LL=597 /DEF=Homo  
sapiens BCL2-related protein A1 (BCL2A1), mRNA. /PROD=BCL2-related protein A1  
/FL=gb:U27467.1 gb:U29680.1 gb:NM\_0040"0.0367066980.04872355\*BCL2-related  
protein A1\*BCL2A1\*Hs.227817\*ENSG00000140379\*6916 // anti-apoptosis //  
traceable author statement /// 42981 // regulation of apoptosis // inferred  
from electronic annotation\*5622 // intracellular // non-traceable author  
statement\*  
225728\_at\*"gb:AI659533 /DB\_XREF=gi:4763103 /DB\_XREF=tu12a12.x1  
/CLONE=IMAGE:2250814 /FEA=EST /CNT=103 /TID=Hs.278626.2 /TIER=Stack /STK=28  
/UG=Hs.278626 /LL=8470 /UG\_GENE=ARGBP2 /UG\_TITLE=ArgAbl-interacting protein  
ArgBP2\*0.0361578460.043453452\*importin 9\*IPO9\*Hs.497384\*ENSG00000198700\*"59  
// protein-nucleus import, docking // inferred from electronic annotation ///  
15031 // protein transport // inferred from electronic annotation"\*5634 //  
nucleus // inferred from electronic annotation /// 5643 // nuclear pore //  
inferred from electronic annotation /// 5737 // cytoplasm // inferred from  
electronic annotation\*5488 // binding // inferred from electronic annotation  
/// 8565 // protein transporter activity // inferred from electronic  
annotation  
231265\_at\*"gb:AI126453 /DB\_XREF=gi:3594967 /DB\_XREF=qd78d05.x1  
/CLONE=IMAGE:1735593 /FEA=EST /CNT=22 /TID=Hs.98701.0 /TIER=Stack /STK=19  
/UG=Hs.98701 /UG\_TITLE=ESTs, Weakly similar to OSHU7B cytochrome-c oxidase  
(H.sapiens)"0.0344179650.105513294\*cytochrome c oxidase subunit  
VIIb2\*COX7B2\*Hs.479656\*ENSG00000170516\*6118 // electron transport // inferred  
from electronic annotation\*5739 // mitochondrion // inferred from electronic  
annotation /// 5746 // mitochondrial electron transport chain // inferred  
from electronic annotation /// 16021 // integral to membrane // inferred from  
electronic annotation /// 19866 // inner membrane // \*4129 // cytochrome-c  
oxidase activity // inferred from electronic annotation /// 16491 //  
oxidoreductase activity // inferred from electronic annotation  
205015\_s\_at\*"gb:M31172.1 /DB\_XREF=gi:339537 /GEN=TGFA /FEA=FLmRNA /CNT=49  
/TID=Hs.170009.0 /TIER=FL /STK=0 /UG=Hs.170009 /LL=7039  
/UG\_TITLE=transforming growth factor, alpha /DEF=Human transforming growth  
factor-alpha mRNA, complete cds. /FL=gb:NM\_003236.1  
gb:K03222.1"0.0342678530.038435149\*"transforming growth factor,  
alpha"\*TGFA\*Hs.170009\*ENSG00000163235\*74 // regulation of cell cycle //  
inferred from electronic annotation /// 7267 // cell-cell signaling // not  
recorded /// 8283 // cell proliferation // traceable author statement\*5615 //  
extracellular space // not recorded /// 5625 // soluble fraction // not  
recorded /// 5886 // plasma membrane // non-traceable author statement ///  
5887 // integral to plasma membrane // not recorded\*4713 // protein-tyrosine  
kinase activity // traceable author statement /// 4871 // signal transducer  
activity // traceable author statement /// 5155 // epidermal growth factor  
receptor activating ligand activity // not recorded /// 5515 // protein  
binding  
212671\_s\_at\*"gb:BG397856 /DB\_XREF=gi:13291304 /DB\_XREF=602438950F1  
/CLONE=IMAGE:4564956 /FEA=mRNA /CNT=167 /TID=Hs.198253.2 /TIER=Stack /STK=59  
/UG=Hs.198253 /LL=3117 /UG\_GENE=HLA-DQA1 /UG\_TITLE=major histocompatibility  
complex, class II, DQ alpha 1"0.0315421410.006992358\*"major  
histocompatibility complex, class II, DQ alpha 1 /// major histocompatibility  
complex, class II, DQ alpha 2"\*HLA-DQA1 ///  
HLA-DQA2\*Hs.550475\*ENSG00000196735 /// ENSG00000166623\*"6955 // immune  
response // inferred from electronic annotation /// 19884 // antigen  
presentation, exogenous antigen // inferred from electronic annotation ///  
19886 // antigen processing, exogenous antigen via MHC class II // inferred  
from electronic anno"\*16020 // membrane // inferred from electronic  
annotation /// 16021 // integral to membrane // inferred from electronic  
annotation /// 5887 // integral to plasma membrane // non-traceable author  
statement\*45012 // MHC class II receptor activity // inferred from electronic  
annotation /// 45012 // MHC class II receptor activity // traceable author  
statement /// 45012 // MHC class II receptor activity // non-traceable author  
statement  
219263\_at\*"gb:NM\_024539.1 /DB\_XREF=gi:13375696 /GEN=FLJ23516 /FEA=FLmRNA  
/CNT=88 /TID=Hs.9238.0 /TIER=FL /STK=0 /UG=Hs.9238 /LL=79589 /DEF=Homo  
sapiens hypothetical protein FLJ23516 (FLJ23516), mRNA. /PROD=hypothetical  
protein FLJ23516 /FL=gb:NM\_024539.1"0.025901770.027373242\*ring finger  
protein 128\*RNFI28\*Hs.496542\*ENSG00000133135\*6508 // proteolysis and  
peptidolysis // inferred from electronic annotation /// 6915 // apoptosis //  
inferred from electronic annotation /// 16567 // protein ubiquitination //  
inferred from electronic annotation\*151 // ubiquitin ligase complex //  
inferred from electronic annotation /// 16021 // integral to membrane //  
inferred from electronic annotation\*4842 // ubiquitin-protein ligase activity

// inferred from electronic annotation /// 8233 // peptidase activity //  
inferred from electronic annotation /// 8270 // zinc ion binding // inferred  
from electronic annotation  
229352\_at•gb:AA885360 /DB\_XREF=gi:2994437 /DB\_XREF=al45h12.s1  
/CLONE=IMAGE:1460327 /FEA=EST /CNT=31 /TID=Hs.236676.0 /TIER=Stack /STK=21  
/UG=Hs.236676 /UG\_TITLE=ESTs•0.025546236•0.037112446•sperm equatorial segment  
protein 1•SPESP1••ENSG00000175374•••  
203708\_at•"gb:NM\_002600.1 /DB\_XREF=gi:4505662 /GEN=PDE4B /FEA=FLmRNA /CNT=100  
/TID=Hs.188.0 /TIER=FL /STK=2 /UG=Hs.188 /LL=5142 /DEF=Homo sapiens  
phosphodiesterase 4B, cAMP-specific (dunce (Drosophila)-homolog  
phosphodiesterase E4) (PDE4B), mRNA.  
/PROD=phosphodiesterase"•0.024942238•0.059199279•"phosphodiesterase 4B,  
cAMP-specific (phosphodiesterase E4 dunce homolog,  
Drosophila)"•PDE4B•Hs.198072•ENSG00000184588•7165 // signal transduction //  
inferred from electronic annotation•5625 // soluble fraction // traceable  
author statement /// 5626 // insoluble fraction // traceable author  
statement•4115 // cAMP-specific phosphodiesterase activity // traceable  
author statement /// 16787 // hydrolase activity // inferred from electronic  
annotation  
206552\_s\_at•"gb:NM\_003182.1 /DB\_XREF=gi:4507340 /GEN=TAC1 /FEA=FLmRNA /CNT=13  
/TID=Hs.2563.2 /TIER=FL /STK=6 /UG=Hs.2563 /LL=6863 /DEF=Homo sapiens  
tachykinin, precursor 1 (substance K, substance P, neurokinin 1, neurokinin  
2, neuromedin L, neurokinin alpha,  
neuropept"•0.022413749•0.014922364•"tachykinin, precursor 1 (substance K,  
substance P, neurokinin 1, neurokinin 2, neuromedin L, neurokinin alpha,  
neuropeptide K, neuropeptide gamma)"•TAC1•Hs.2563•ENSG00000006128•7217 //  
tachykinin signaling pathway // inferred from electronic annotation /// 7218  
// neuropeptide signaling pathway // inferred from electronic annotation ///  
7267 // cell-cell signaling // traceable author statement /// 7268 //  
synaptic transmission //•5615 // extracellular space // traceable author  
statement•5102 // receptor binding // traceable author statement /// 5184 //  
neuropeptide hormone activity // not recorded



**Supplementary Methods***Quantitative RT-PCR probes and oligonucleotides*

TaqMan® probes (Applied Biosystems) were used to detect mRNA levels of *PEDF* (Hs00171467\_m1), *IL8* (Hs00174103\_m1) and *GAPDH* (Hs99999905\_m1).

Universal Probe Library (UPL) (Roche, Basel, Switzerland) probes and oligonucleotides used to detect mRNA levels of *COL4A2*, *FGF13*, *FNI*, *GAPDH*, *IL8*, *JAG1*, *LGALS3*, *MIA*, *MLPH*, *RAB27A*, *S100B* and *TGFA* are listed in Supplementary Table 1.

**Supplementary Table 1.** List of probes and oligonucleotides for quantitative RT-PCR

| Gene          | UPL probe | Forward oligonucleotide 5'-3' | Reverse oligonucleotide 5'-3' |
|---------------|-----------|-------------------------------|-------------------------------|
| <i>COL4A2</i> | #81       | gggatatttgccctgaaagg          | caggaagagcagcagaacct          |
| <i>FGF13</i>  | #56       | ccattgatggcaccaaagat          | ccacagggatgaggtaaaca          |
| <i>FNI</i>    | #15       | ctttggtgcagcacaacttc          | cctcctcagatctgaaccaa          |
| <i>GAPDH</i>  | #60       | agccacatcgctcagacac           | gccaatacagaccaaatcc           |
| <i>IGFBP3</i> | #4        | agaagggattttataagaaaaagcagt   | cttatccacacaccagcagaag        |
| <i>IL8</i>    | #72       | agacagcagagcacacaagc          | cacagtgagatggttcctcc          |
| <i>JAG1</i>   | #42       | gaatggcaacaaaacttgcat         | agccttgcggcaaatagc            |
| <i>LGALS3</i> | #59       | cttctggacagccaagtgc           | aaaggcaggtataaggcacia         |
| <i>MIA</i>    | #16       | gggccaagtgggtgatgtct          | cagatctccatagtaatctcctga      |
| <i>MLPH</i>   | #67       | cacagttgtgcctcccttg           | ggcctcctcctctacatcg           |
| <i>RAB27A</i> | #51       | aggccagagaatccacctg           | cgctgtcgttaagctacgaa          |
| <i>S100B</i>  | #78       | ggaaggggtgagacaagga           | ggtggaaaacgtgatgag            |
| <i>TGFA</i>   | #63       | tgctgccactcagaacagct          | atctgccacagtccacctg           |
